# Supplementary material for: Safety, health improvement and well-being during a 4 to 21-day fasting period in an observational study including 1422 subjects
Source: PubMed Central journal article supplement (PMC6314618; doi:10.1371/journal.pone.0209353), 2019-01-02
Supplement: pone.0209353.s002.pdf [file pone.0209353.s002.pdf]

**S2 Table: Effect of fasting on lipid parameters and glycaemia.**

|                    | All<br>(n= 1422) |          | F5d<br>5±2 d |          | F10d<br>10±2 d |          | F15d<br>15±2 d |          | F20d<br>20±2 d |          | p-values                |                              |        |                                                             |                                    |
|--------------------|------------------|----------|--------------|----------|----------------|----------|----------------|----------|----------------|----------|-------------------------|------------------------------|--------|-------------------------------------------------------------|------------------------------------|
|                    | pre              | post     | pre          | post     | pre            | post     | pre            | post     | pre            | post     | fasting<br>intervention | fasting<br>duration<br>group | sex    | fasting<br>duration<br>group-by-<br>fasting<br>intervention | fasting<br>intervention<br>-by-sex |
| TG, mmol/l         | 1.5±0.0          | 1.1±0.0  | 1.5±0.0      | 1.1±0.0  | 1.6±0.0        | 1.1±0.0  | 1.6±0.1        | 1.1±0.0  | 1.5±0.1        | 1.2±0.0  | <0.001                  | 0.004                        | 0.72   | 0.001                                                       | <0.001                             |
| TC, mmol/l         | 5.6±0.0          | 4.9±0.0  | 5.5±0.0      | 5.2±0.0  | 5.6±0.0        | 4.9±0.0  | 5.6±0.1        | 4.4±0.1  | 5.7±0.2        | 4.5±0.2  | <0.001                  | <0.001                       | 0.67   | <0.001                                                      | –                                  |
| HDL-C, mmol/l      | 1.5±0.0          | 1.3±0.0  | 1.6±0.0      | 1.4±0.0  | 1.5±0.0        | 1.3±0.0  | 1.5±0.0        | 1.2±0.0  | 1.5±0.1        | 1.1±0.0  | <0.001                  | <0.001                       | 0.36   | <0.001                                                      | <0.001                             |
| LDL-C, mmol/l      | 3.5±0.0          | 3.2±0.0  | 3.4±0.0      | 3.4±0.0  | 3.5±0.0        | 3.1±0.0  | 3.6±0.1        | 2.7±0.1  | 3.8±0.2        | 2.8±0.2  | <0.001                  | <0.001                       | 0.19   | <0.001                                                      | –                                  |
| LDL/HDL ratio      | 2.6±0.1          | 2.6±0.0  | 2.7±0.3      | 2.7±0.0  | 2.5±0.0        | 2.6±0.1  | 2.5±0.1        | 2.4±0.1  | 2.7±0.1        | 2.6±0.2  | 0.66                    | 0.003                        | <0.001 | –                                                           | –                                  |
| Glucose,<br>mmol/l | 5.4±0.0          | 4.7±0.0  | 5.3±0.0      | 4.6±0.0  | 5.4±0.1        | 4.7±0.1  | 5.6±0.1        | 4.7±0.1  | 5.5±0.2        | 4.9±0.2  | <0.001                  | 0.68                         | 0.12   | 0.03                                                        | <0.001                             |
| HbA1c,<br>mmol/mol | 36.0±0.2         | 34.3±0.2 | 35.5±0.3     | 34.2±0.3 | 36.1±0.3       | 34.4±0.3 | 36.7±0.4       | 34.5±0.4 | 37.6±1.3       | 34.9±1.0 | <0.001                  | <0.001                       | 0.67   | <0.001                                                      | 0.03                               |

Values are shown as mean±SEM for all of the groups with different fasting lengths. P-values were calculated for the effects of fasting intervention as well as the effects of the fasting length (fasting duration group) and gender (sex). Interactions between fasting intervention by fasting duration group (fasting duration group-by-fasting intervention) and fasting intervention by gender (fasting intervention-by-sex) are shown.

TG, triglyceride; TC, total cholesterol; HDL-C, high-density-lipoprotein; LDL-C, low-density-lipoprotein; HbA1c, glycated haemoglobin.
