# Supplementary material for: Safety, health improvement and well-being during a 4 to 21-day fasting period in an observational study including 1422 subjects
Source: PubMed Central journal article supplement (PMC6314618; doi:10.1371/journal.pone.0209353), 2019-01-02
Supplement: pone.0209353.s017.pdf [file pone.0209353.s017.pdf]

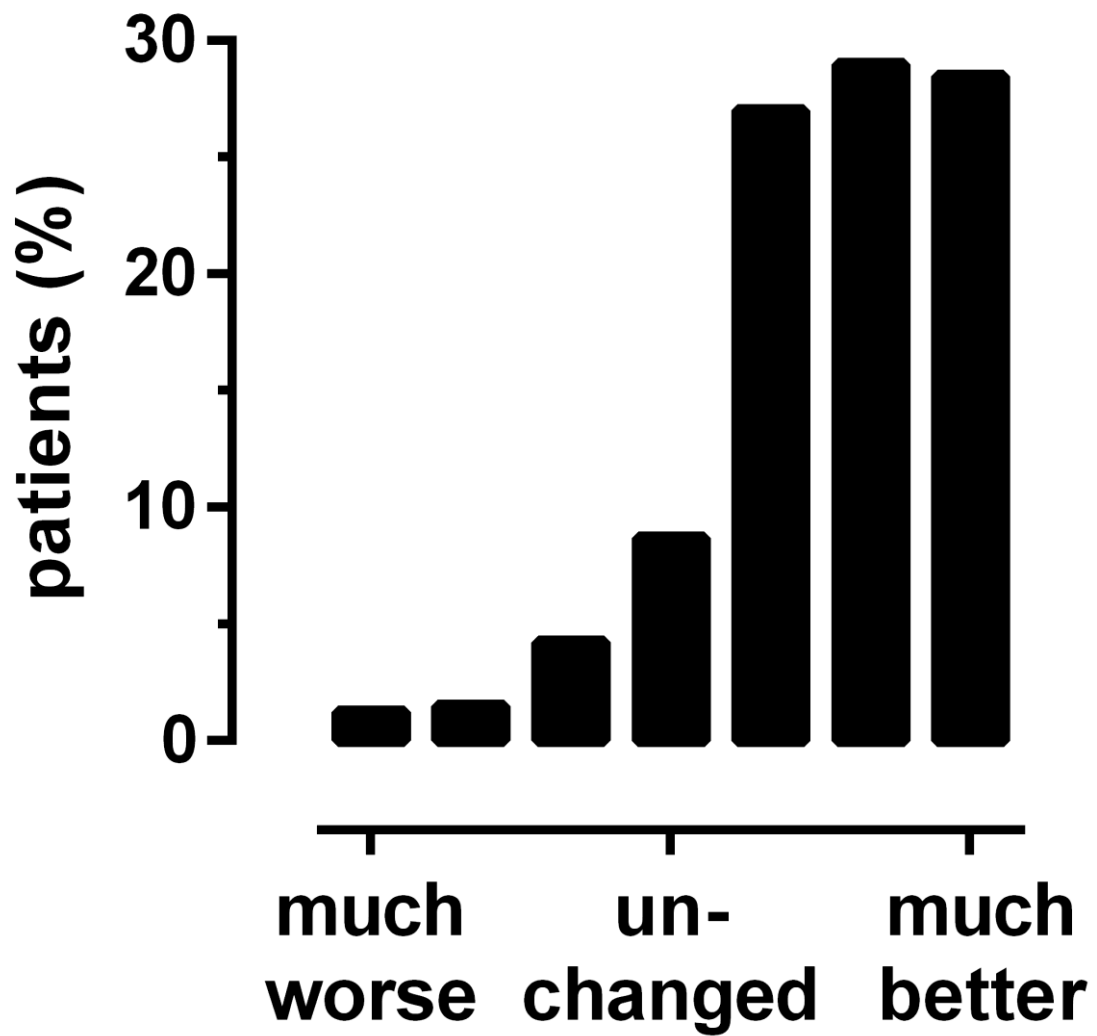

**S2\_Fig. Evolution of a pre-existing health complaint.** A subgroup of 404 subjects indicated to have a major health complaint previous to the fasting.
