# Supplementary material for: Safety, health improvement and well-being during a 4 to 21-day fasting period in an observational study including 1422 subjects
Source: PubMed Central journal article supplement (PMC6314618; doi:10.1371/journal.pone.0209353), 2019-01-02
Supplement: pone.0209353.s021.pdf [file pone.0209353.s021.pdf]

# S4 Text. Questionnaires in German.

## Tagebuch zur Selbstbeobachtung

Name: \_\_\_\_\_

Zimmernummer: \_\_\_\_\_

Aufenthalt von: \_\_\_\_\_ bis: \_\_\_\_\_

Liebe Patientinnen und Patienten,  
liebe Gäste,

die Umstellung des Stoffwechsels durch das Fasten oder eine kalorienreduzierte vegetarische Diät kann sich auf das persönliche Befinden auswirken. Mit Hilfe dieses Tagebuchs können die Wirkungen erfasst und besser verstanden werden. Außerdem kann es dazu dienen, die Therapieempfehlungen in Zukunft zu optimieren.

Nur eine lückenlose Dokumentation erlaubt es Zusammenhänge zu erkennen. Daher bitten wir Sie, das Tagebuch täglich, möglichst abends, detailgetreu auszufüllen.

Zudem bitten wir Sie, folgende Angaben zu machen:

1. Lebensstil – vor dem Aufenthalt (S. 7)
2. Lebensstil – während des Aufenthalts (S. 53)
3. Fragen am Ende des Aufenthalts (S. 52)

Geben Sie bitte am Abreisetag das vollständig ausgefüllte Tagebuch an Ihre Stationsschwester zurück.

Vielen Dank für Ihre Teilnahme!

Dr. Françoise Wilhelmi de Toledo und  
das wissenschaftliche Team der Klinik Buchinger Wilhelmi

## **Anleitung:**

- Datum:  
Bitte tragen Sie als erstes das Datum ein. Der erste Tag entspricht dem Anreisetag.
- Kostform:  
Die zutreffende Kostform für den aktuellen Tag wird mit einem Kreuz markiert und die zugehörigen Angaben gegebenenfalls angekreuzt. Bitte markieren Sie nicht zutreffende Aussagen mit einem Kreuz im Nein-Feld.
- Ketonkörper:  
Messen Sie die Ketonkörper mit Hilfe der Ketostix im ersten Morgenurin und geben Sie das Resultat im vorgesehenen Feld an. Bitte beachten Sie, dass nur ein Wert angegeben werden kann.
- Körperliches und psychisch-seelisches Befinden:  
Beurteilen Sie intuitiv Ihr körperliches und emotionales Befinden auf einer Skala zwischen 0 und 10. Bitte legen Sie sich auf einen Wert fest.
- Beschwerden:  
Falls keine Beschwerden aufgetreten sind, kreuzen Sie bitte Nein an. Falls doch, markieren Sie Ja und wählen ein bzw. mehrere Beschwerden, die aufgetreten sind.
- Wohlbefinden am heutigen Tag:  
Schätzen Sie, wie häufig jede der aufgeführten Aussagen am heutigen Tag auftrat und markieren Sie eine Zahl zwischen 0 und 5.

## Beispieltag: Montag, 18.01.16

Ketonkörper (mg/dl):  0  5  15  40  80  160

**Diät:**  800 kcal  1.200 kcal  1.800 kcal

Zusätze:  nein  Fisch

andere: \_\_\_\_\_

**Entlastungstag:**  Reis  Kartoffel/Gemüse

Früchte

andere: \_\_\_\_\_

**Fasten:** Honig  nein  ja

mittags: Saft (¼ l)  nein  ja

Gemüsebrühe (¼ l)  nein  ja

abends: Gemüsebrühe (¼ l)  nein  ja

Zusätze:  nein  Kousmine  Kousmine vegan

Joghurt  Haferschleim

Reisschleim  Karottensaft

grüner Tee  schwarzer Tee

andere: \_\_\_\_\_

**Fastenbrechen**

**Aufbautag:**  1  2  3  4

**Körperliches Befinden:**

sehr schlecht

|   |   |                                     |   |   |   |   |   |   |   |    |
|---|---|-------------------------------------|---|---|---|---|---|---|---|----|
| 0 | 1 | <input checked="" type="checkbox"/> | 3 | 4 | 5 | 6 | 7 | 8 | 9 | 10 |
|---|---|-------------------------------------|---|---|---|---|---|---|---|----|

hervorragend

**Psychisch-seelisches Befinden:**

sehr schlecht

|   |   |   |   |   |   |   |   |                                     |   |    |
|---|---|---|---|---|---|---|---|-------------------------------------|---|----|
| 0 | 1 | 2 | 3 | 4 | 5 | 6 | 7 | <input checked="" type="checkbox"/> | 9 | 10 |
|---|---|---|---|---|---|---|---|-------------------------------------|---|----|

hervorragend

In der Klinik neu aufgetretene Beschwerden:  nein  ja

- |                                                                   |                                          |
|-------------------------------------------------------------------|------------------------------------------|
| <input type="checkbox"/> Kopfschmerzen                            | <input type="checkbox"/> Muskelschmerzen |
| <input type="checkbox"/> Schlafstörungen                          | <input type="checkbox"/> Sodbrennen      |
| <input type="checkbox"/> Mundgeruch<br>(fragen Sie die Schwester) | <input type="checkbox"/> Übelkeit        |
| <input type="checkbox"/> Müdigkeit                                | <input type="checkbox"/> Trockener Mund  |
| <input type="checkbox"/> Rückenschmerzen                          | <input type="checkbox"/> Wadenkrämpfe    |
| <input type="checkbox"/> Kälteempfindlichkeit                     | <input type="checkbox"/> Durchfall       |
| <input type="checkbox"/> Schwindel                                | <input type="checkbox"/> Unruhige Beine  |
| <input type="checkbox"/> Hunger                                   | <input type="checkbox"/> Obstipation     |
| <input type="checkbox"/> Hautausschlag                            | <input type="checkbox"/> Herzklopfen     |
| <input type="checkbox"/> Blähungen                                | <input type="checkbox"/> Sehstörungen    |
| <input type="checkbox"/> sonstige: _____                          | <input type="checkbox"/> Essdrang        |

Am heutigen Tag...

|                                                                 | zu keinem<br>Zeitpunkt | ab und zu | etwas weniger als<br>die Hälfte der Zeit | etwas mehr als<br>die Hälfte der Zeit | meistens     | die ganze Zeit |
|-----------------------------------------------------------------|------------------------|-----------|------------------------------------------|---------------------------------------|--------------|----------------|
| ...war ich froh und guter Laune                                 | 0                      | 1         | 2                                        | 3                                     | <del>4</del> | 5              |
| ...habe ich mich ruhig und<br>entspannt gefühlt                 | 0                      | 1         | <del>2</del>                             | 3                                     | 4            | 5              |
| ...habe ich mich energisch und<br>aktiv gefühlt                 | 0                      | 1         | 2                                        | 3                                     | 4            | <del>5</del>   |
| ...habe ich mich beim Aufwachen<br>frisch und ausgeruht gefühlt | <del>0</del>           | 1         | 2                                        | 3                                     | 4            | 5              |
| ...war mein Alltag voller Dinge,<br>die mich interessieren      | 0                      | 1         | 2                                        | 3                                     | <del>4</del> | 5              |

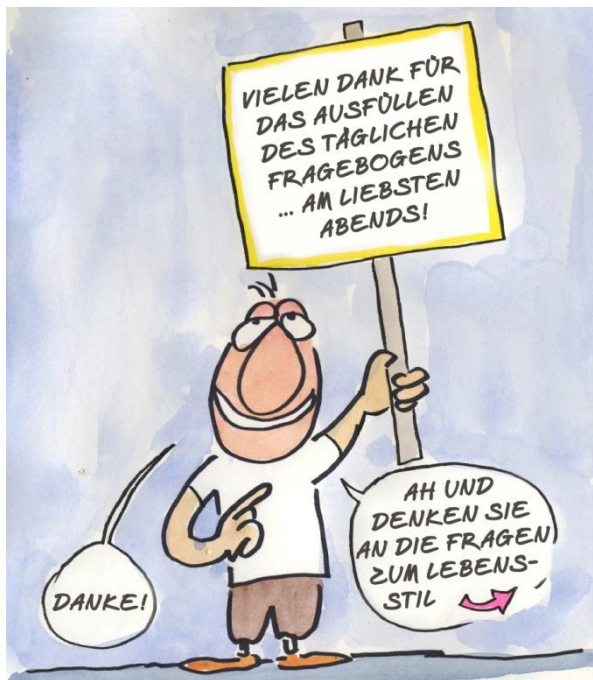

# Lebensstil – vor dem Aufenthalt

## Stress-/Entspannungsniveau:

bedrohliche  
Anspannung

|   |   |   |   |   |   |   |   |   |   |    |
|---|---|---|---|---|---|---|---|---|---|----|
| 0 | 1 | 2 | 3 | 4 | 5 | 6 | 7 | 8 | 9 | 10 |
|---|---|---|---|---|---|---|---|---|---|----|

total  
entspannt

**Nikotin:**  nein  Zigaretten/Tag:

nein  Zigarren/Tag:

**Alkohol:**  nein  Bier: Gläser (0,5 l)/Woche:

nein  Wein: Gläser (0,25 l)/Woche:

nein  Schnaps: Gläser (2 cl)/Woche:

**Kaffee:**  nein  Tassen/Tag:

**Medien:**  nein  Smartphone (h/Woche):

nein  TV (h/Woche):

nein  PC (h/Woche):

**Sport/**  nein  ja: h/Woche:   ,

## Bewegung:

In den letzten  
zwei Wochen  
vor meinem Aufenthalt...

|                                                                 | zu keinem<br>Zeitpunkt | ab und zu | etwas weniger als<br>die Hälfte der Zeit | etwas mehr als<br>die Hälfte der Zeit | meistens | die ganze Zeit |
|-----------------------------------------------------------------|------------------------|-----------|------------------------------------------|---------------------------------------|----------|----------------|
| ...war ich froh und guter Laune                                 | 0                      | 1         | 2                                        | 3                                     | 4        | 5              |
| ...habe ich mich ruhig und<br>entspannt gefühlt                 | 0                      | 1         | 2                                        | 3                                     | 4        | 5              |
| ...habe ich mich energisch und<br>aktiv gefühlt                 | 0                      | 1         | 2                                        | 3                                     | 4        | 5              |
| ...habe ich mich beim Aufwachen<br>frisch und ausgeruht gefühlt | 0                      | 1         | 2                                        | 3                                     | 4        | 5              |
| ...war mein Alltag voller Dinge,<br>die mich interessieren      | 0                      | 1         | 2                                        | 3                                     | 4        | 5              |

# 1. Tag (Anreise): \_\_\_\_\_

Ketonkörper (mg/dl):  0  5  15  40  80  160

**Diät:**  800 kcal  1.200 kcal  1.800 kcal

Zusätze:  nein  Fisch

andere: \_\_\_\_\_

**Entlastungstag:**  Reis  Kartoffel/Gemüse

Früchte  andere: \_\_\_\_\_

**Fasten:** Honig  nein  ja

mittags: Saft (¼ l)  nein  ja

Gemüsebrühe (¼ l)  nein  ja

abends: Gemüsebrühe (¼ l)  nein  ja

Zusätze:  nein  Kousmine  Kousmine vegan

Joghurt  Haferschleim

Reisschleim  Karottensaft

grüner Tee  schwarzer Tee

andere: \_\_\_\_\_

**Fastenbrechen**

**Aufbautag:**  1  2  3  4

## Körperliches Befinden:

sehr schlecht

|   |   |   |   |   |   |   |   |   |   |    |
|---|---|---|---|---|---|---|---|---|---|----|
| 0 | 1 | 2 | 3 | 4 | 5 | 6 | 7 | 8 | 9 | 10 |
|---|---|---|---|---|---|---|---|---|---|----|

hervorragend

## Psychisch-seelisches Befinden:

sehr schlecht

|   |   |   |   |   |   |   |   |   |   |    |
|---|---|---|---|---|---|---|---|---|---|----|
| 0 | 1 | 2 | 3 | 4 | 5 | 6 | 7 | 8 | 9 | 10 |
|---|---|---|---|---|---|---|---|---|---|----|

hervorragend



**In der Klinik neu aufgetretene Beschwerden:**  nein  ja

- |                                                                   |                                          |
|-------------------------------------------------------------------|------------------------------------------|
| <input type="checkbox"/> Kopfschmerzen                            | <input type="checkbox"/> Muskelschmerzen |
| <input type="checkbox"/> Schlafstörungen                          | <input type="checkbox"/> Sodbrennen      |
| <input type="checkbox"/> Mundgeruch<br>(fragen Sie die Schwester) | <input type="checkbox"/> Übelkeit        |
| <input type="checkbox"/> Müdigkeit                                | <input type="checkbox"/> Trockener Mund  |
| <input type="checkbox"/> Rückenschmerzen                          | <input type="checkbox"/> Wadenkrämpfe    |
| <input type="checkbox"/> Kälteempfindlichkeit                     | <input type="checkbox"/> Durchfall       |
| <input type="checkbox"/> Schwindel                                | <input type="checkbox"/> Unruhige Beine  |
| <input type="checkbox"/> Hunger                                   | <input type="checkbox"/> Obstipation     |
| <input type="checkbox"/> Hautausschlag                            | <input type="checkbox"/> Herzklopfen     |
| <input type="checkbox"/> Blähungen                                | <input type="checkbox"/> Sehstörungen    |
| <input type="checkbox"/> sonstige: _____                          | <input type="checkbox"/> Essdrang        |

**Am heutigen Tag...**

|                                                              | zu keinem<br>Zeitpunkt | ab und zu | etwas weniger als<br>die Hälfte der Zeit | etwas mehr als<br>die Hälfte der Zeit | meistens | die ganze Zeit |
|--------------------------------------------------------------|------------------------|-----------|------------------------------------------|---------------------------------------|----------|----------------|
| ...war ich froh und guter Laune                              | 0                      | 1         | 2                                        | 3                                     | 4        | 5              |
| ...habe ich mich ruhig und entspannt gefühlt                 | 0                      | 1         | 2                                        | 3                                     | 4        | 5              |
| ...habe ich mich energisch und aktiv gefühlt                 | 0                      | 1         | 2                                        | 3                                     | 4        | 5              |
| ...habe ich mich beim Aufwachen frisch und ausgeruht gefühlt | 0                      | 1         | 2                                        | 3                                     | 4        | 5              |
| ...war mein Alltag voller Dinge, die mich interessieren      | 0                      | 1         | 2                                        | 3                                     | 4        | 5              |

## 2. Tag: \_\_\_\_\_

Ketonkörper (mg/dl):  0  5  15  40  80  160

**Diät:**  800 kcal  1.200 kcal  1.800 kcal

Zusätze:  nein  Fisch

andere: \_\_\_\_\_

**Entlastungstag:**  Reis  Kartoffel/Gemüse

Früchte  andere: \_\_\_\_\_

**Fasten:** Honig  nein  ja

mittags: Saft (¼ l)  nein  ja

Gemüsebrühe (¼ l)  nein  ja

abends: Gemüsebrühe (¼ l)  nein  ja

Zusätze:  nein  Kousmine  Kousmine vegan

Joghurt  Haferschleim

Reisschleim  Karottensaft

grüner Tee  schwarzer Tee

andere: \_\_\_\_\_

**Fastenbrechen**

**Aufbautag:**  1  2  3  4

### Körperliches Befinden:

sehr schlecht

|   |   |   |   |   |   |   |   |   |   |    |
|---|---|---|---|---|---|---|---|---|---|----|
| 0 | 1 | 2 | 3 | 4 | 5 | 6 | 7 | 8 | 9 | 10 |
|---|---|---|---|---|---|---|---|---|---|----|

hervorragend

### Psychisch-seelisches Befinden:

sehr schlecht

|   |   |   |   |   |   |   |   |   |   |    |
|---|---|---|---|---|---|---|---|---|---|----|
| 0 | 1 | 2 | 3 | 4 | 5 | 6 | 7 | 8 | 9 | 10 |
|---|---|---|---|---|---|---|---|---|---|----|

hervorragend

**In der Klinik neu aufgetretene Beschwerden:**  nein  ja

- |                                                                   |                                          |
|-------------------------------------------------------------------|------------------------------------------|
| <input type="checkbox"/> Kopfschmerzen                            | <input type="checkbox"/> Muskelschmerzen |
| <input type="checkbox"/> Schlafstörungen                          | <input type="checkbox"/> Sodbrennen      |
| <input type="checkbox"/> Mundgeruch<br>(fragen Sie die Schwester) | <input type="checkbox"/> Übelkeit        |
| <input type="checkbox"/> Müdigkeit                                | <input type="checkbox"/> Trockener Mund  |
| <input type="checkbox"/> Rückenschmerzen                          | <input type="checkbox"/> Wadenkrämpfe    |
| <input type="checkbox"/> Kälteempfindlichkeit                     | <input type="checkbox"/> Durchfall       |
| <input type="checkbox"/> Schwindel                                | <input type="checkbox"/> Unruhige Beine  |
| <input type="checkbox"/> Hunger                                   | <input type="checkbox"/> Obstipation     |
| <input type="checkbox"/> Hautausschlag                            | <input type="checkbox"/> Herzklopfen     |
| <input type="checkbox"/> Blähungen                                | <input type="checkbox"/> Sehstörungen    |
| <input type="checkbox"/> sonstige: _____                          | <input type="checkbox"/> Essdrang        |

**Am heutigen Tag...**

|                                                                 | zu keinem<br>Zeitpunkt | ab und zu | etwas weniger als<br>die Hälfte der Zeit | etwas mehr als<br>die Hälfte der Zeit | meistens | die ganze Zeit |
|-----------------------------------------------------------------|------------------------|-----------|------------------------------------------|---------------------------------------|----------|----------------|
| ...war ich froh und guter Laune                                 | 0                      | 1         | 2                                        | 3                                     | 4        | 5              |
| ...habe ich mich ruhig und<br>entspannt gefühlt                 | 0                      | 1         | 2                                        | 3                                     | 4        | 5              |
| ...habe ich mich energisch und<br>aktiv gefühlt                 | 0                      | 1         | 2                                        | 3                                     | 4        | 5              |
| ...habe ich mich beim Aufwachen<br>frisch und ausgeruht gefühlt | 0                      | 1         | 2                                        | 3                                     | 4        | 5              |
| ...war mein Alltag voller Dinge,<br>die mich interessieren      | 0                      | 1         | 2                                        | 3                                     | 4        | 5              |

### 3. Tag: \_\_\_\_\_

Ketonkörper (mg/dl):  0  5  15  40  80  160

**Diät:**  800 kcal  1.200 kcal  1.800 kcal

Zusätze:  nein  Fisch

andere: \_\_\_\_\_

**Entlastungstag:**  Reis  Kartoffel/Gemüse

Früchte  andere: \_\_\_\_\_

**Fasten:** Honig  nein  ja

mittags: Saft (¼ l)  nein  ja

Gemüsebrühe (¼ l)  nein  ja

abends: Gemüsebrühe (¼ l)  nein  ja

Zusätze:  nein  Kousmine  Kousmine vegan

Joghurt  Haferschleim

Reisschleim  Karottensaft

grüner Tee  schwarzer Tee

andere: \_\_\_\_\_

**Fastenbrechen**

**Aufbautag:**  1  2  3  4

### Körperliches Befinden:

sehr schlecht

|   |   |   |   |   |   |   |   |   |   |    |
|---|---|---|---|---|---|---|---|---|---|----|
| 0 | 1 | 2 | 3 | 4 | 5 | 6 | 7 | 8 | 9 | 10 |
|---|---|---|---|---|---|---|---|---|---|----|

hervorragend

### Psychisch-seelisches Befinden:

sehr schlecht

|   |   |   |   |   |   |   |   |   |   |    |
|---|---|---|---|---|---|---|---|---|---|----|
| 0 | 1 | 2 | 3 | 4 | 5 | 6 | 7 | 8 | 9 | 10 |
|---|---|---|---|---|---|---|---|---|---|----|

hervorragend

**In der Klinik neu aufgetretene Beschwerden:**  nein  ja

- |                                                                   |                                          |
|-------------------------------------------------------------------|------------------------------------------|
| <input type="checkbox"/> Kopfschmerzen                            | <input type="checkbox"/> Muskelschmerzen |
| <input type="checkbox"/> Schlafstörungen                          | <input type="checkbox"/> Sodbrennen      |
| <input type="checkbox"/> Mundgeruch<br>(fragen Sie die Schwester) | <input type="checkbox"/> Übelkeit        |
| <input type="checkbox"/> Müdigkeit                                | <input type="checkbox"/> Trockener Mund  |
| <input type="checkbox"/> Rückenschmerzen                          | <input type="checkbox"/> Wadenkrämpfe    |
| <input type="checkbox"/> Kälteempfindlichkeit                     | <input type="checkbox"/> Durchfall       |
| <input type="checkbox"/> Schwindel                                | <input type="checkbox"/> Unruhige Beine  |
| <input type="checkbox"/> Hunger                                   | <input type="checkbox"/> Obstipation     |
| <input type="checkbox"/> Hautausschlag                            | <input type="checkbox"/> Herzklopfen     |
| <input type="checkbox"/> Blähungen                                | <input type="checkbox"/> Sehstörungen    |
| <input type="checkbox"/> sonstige: _____                          | <input type="checkbox"/> Essdrang        |

**Am heutigen Tag...**

|                                                              | zu keinem<br>Zeitpunkt | ab und zu | etwas weniger als<br>die Hälfte der Zeit | etwas mehr als<br>die Hälfte der Zeit | meistens | die ganze Zeit |
|--------------------------------------------------------------|------------------------|-----------|------------------------------------------|---------------------------------------|----------|----------------|
| ...war ich froh und guter Laune                              | 0                      | 1         | 2                                        | 3                                     | 4        | 5              |
| ...habe ich mich ruhig und entspannt gefühlt                 | 0                      | 1         | 2                                        | 3                                     | 4        | 5              |
| ...habe ich mich energisch und aktiv gefühlt                 | 0                      | 1         | 2                                        | 3                                     | 4        | 5              |
| ...habe ich mich beim Aufwachen frisch und ausgeruht gefühlt | 0                      | 1         | 2                                        | 3                                     | 4        | 5              |
| ...war mein Alltag voller Dinge, die mich interessieren      | 0                      | 1         | 2                                        | 3                                     | 4        | 5              |

## 4. Tag: \_\_\_\_\_

Ketonkörper (mg/dl):  0  5  15  40  80  160

**Diät:**  800 kcal  1.200 kcal  1.800 kcal

Zusätze:  nein  Fisch

andere: \_\_\_\_\_

**Entlastungstag:**  Reis  Kartoffel/Gemüse

Früchte  andere: \_\_\_\_\_

**Fasten:** Honig  nein  ja

mittags: Saft (¼ l)  nein  ja

Gemüsebrühe (¼ l)  nein  ja

abends: Gemüsebrühe (¼ l)  nein  ja

Zusätze:  nein  Kousmine  Kousmine vegan

Joghurt  Haferschleim

Reisschleim  Karottensaft

grüner Tee  schwarzer Tee

andere: \_\_\_\_\_

**Fastenbrechen**

**Aufbautag:**  1  2  3  4

### Körperliches Befinden:

sehr schlecht

|   |   |   |   |   |   |   |   |   |   |    |
|---|---|---|---|---|---|---|---|---|---|----|
| 0 | 1 | 2 | 3 | 4 | 5 | 6 | 7 | 8 | 9 | 10 |
|---|---|---|---|---|---|---|---|---|---|----|

hervorragend

### Psychisch-seelisches Befinden:

sehr schlecht

|   |   |   |   |   |   |   |   |   |   |    |
|---|---|---|---|---|---|---|---|---|---|----|
| 0 | 1 | 2 | 3 | 4 | 5 | 6 | 7 | 8 | 9 | 10 |
|---|---|---|---|---|---|---|---|---|---|----|

hervorragend

**In der Klinik neu aufgetretene Beschwerden:**  nein  ja

- |                                               |                                          |
|-----------------------------------------------|------------------------------------------|
| <input type="checkbox"/> Kopfschmerzen        | <input type="checkbox"/> Muskelschmerzen |
| <input type="checkbox"/> Schlafstörungen      | <input type="checkbox"/> Sodbrennen      |
| <input type="checkbox"/> Mundgeruch           | <input type="checkbox"/> Übelkeit        |
| (fragen Sie die Schwester)                    | <input type="checkbox"/> Trockener Mund  |
| <input type="checkbox"/> Müdigkeit            | <input type="checkbox"/> Wadenkrämpfe    |
| <input type="checkbox"/> Rückenschmerzen      | <input type="checkbox"/> Durchfall       |
| <input type="checkbox"/> Kälteempfindlichkeit | <input type="checkbox"/> Unruhige Beine  |
| <input type="checkbox"/> Schwindel            | <input type="checkbox"/> Obstipation     |
| <input type="checkbox"/> Hunger               | <input type="checkbox"/> Herzklopfen     |
| <input type="checkbox"/> Hautausschlag        | <input type="checkbox"/> Sehstörungen    |
| <input type="checkbox"/> Blähungen            | <input type="checkbox"/> Essdrang        |
| <input type="checkbox"/> sonstige: _____      |                                          |

**Am heutigen Tag...**

|                                                                  | zu keinem<br>Zeitpunkt | ab und zu | etwas weniger als<br>die Hälfte der Zeit | etwas mehr als<br>die Hälfte der Zeit | meistens | die ganze Zeit |
|------------------------------------------------------------------|------------------------|-----------|------------------------------------------|---------------------------------------|----------|----------------|
| ... war ich froh und guter Laune                                 | 0                      | 1         | 2                                        | 3                                     | 4        | 5              |
| ... habe ich mich ruhig und<br>entspannt gefühlt                 | 0                      | 1         | 2                                        | 3                                     | 4        | 5              |
| ... habe ich mich energisch und<br>aktiv gefühlt                 | 0                      | 1         | 2                                        | 3                                     | 4        | 5              |
| ... habe ich mich beim Aufwachen<br>frisch und ausgeruht gefühlt | 0                      | 1         | 2                                        | 3                                     | 4        | 5              |
| ... war mein Alltag voller Dinge,<br>die mich interessieren      | 0                      | 1         | 2                                        | 3                                     | 4        | 5              |

5. Tag: \_\_\_\_\_

Ketonkörper (mg/dl):  0  5  15  40  80  160

**Diät:**  800 kcal  1.200 kcal  1.800 kcal

Zusätze:  nein  Fisch

andere: \_\_\_\_\_

**Entlastungstag:**  Reis  Kartoffel/Gemüse

Früchte  andere: \_\_\_\_\_

**Fasten:** Honig  nein  ja

mittags: Saft (¼ l)  nein  ja

Gemüsebrühe (¼ l)  nein  ja

abends: Gemüsebrühe (¼ l)  nein  ja

Zusätze:  nein  Kousmine  Kousmine vegan

Joghurt  Haferschleim

Reisschleim  Karottensaft

grüner Tee  schwarzer Tee

andere: \_\_\_\_\_

**Fastenbrechen**

**Aufbautag:**  1  2  3  4

**Körperliches Befinden:**

sehr schlecht

|   |   |   |   |   |   |   |   |   |   |    |
|---|---|---|---|---|---|---|---|---|---|----|
| 0 | 1 | 2 | 3 | 4 | 5 | 6 | 7 | 8 | 9 | 10 |
|---|---|---|---|---|---|---|---|---|---|----|

hervorragend

**Psychisch-seelisches Befinden:**

sehr schlecht

|   |   |   |   |   |   |   |   |   |   |    |
|---|---|---|---|---|---|---|---|---|---|----|
| 0 | 1 | 2 | 3 | 4 | 5 | 6 | 7 | 8 | 9 | 10 |
|---|---|---|---|---|---|---|---|---|---|----|

hervorragend



**In der Klinik neu aufgetretene Beschwerden:**  nein  ja

- |                                                                   |                                          |
|-------------------------------------------------------------------|------------------------------------------|
| <input type="checkbox"/> Kopfschmerzen                            | <input type="checkbox"/> Muskelschmerzen |
| <input type="checkbox"/> Schlafstörungen                          | <input type="checkbox"/> Sodbrennen      |
| <input type="checkbox"/> Mundgeruch<br>(fragen Sie die Schwester) | <input type="checkbox"/> Übelkeit        |
| <input type="checkbox"/> Müdigkeit                                | <input type="checkbox"/> Trockener Mund  |
| <input type="checkbox"/> Rückenschmerzen                          | <input type="checkbox"/> Wadenkrämpfe    |
| <input type="checkbox"/> Kälteempfindlichkeit                     | <input type="checkbox"/> Durchfall       |
| <input type="checkbox"/> Schwindel                                | <input type="checkbox"/> Unruhige Beine  |
| <input type="checkbox"/> Hunger                                   | <input type="checkbox"/> Obstipation     |
| <input type="checkbox"/> Hautausschlag                            | <input type="checkbox"/> Herzklopfen     |
| <input type="checkbox"/> Blähungen                                | <input type="checkbox"/> Sehstörungen    |
| <input type="checkbox"/> sonstige: _____                          | <input type="checkbox"/> Essdrang        |

**Am heutigen Tag...**

|                                                                 | zu keinem<br>Zeitpunkt | ab und zu | etwas weniger als<br>die Hälfte der Zeit | etwas mehr als<br>die Hälfte der Zeit | meistens | die ganze Zeit |
|-----------------------------------------------------------------|------------------------|-----------|------------------------------------------|---------------------------------------|----------|----------------|
| ...war ich froh und guter Laune                                 | 0                      | 1         | 2                                        | 3                                     | 4        | 5              |
| ...habe ich mich ruhig und<br>entspannt gefühlt                 | 0                      | 1         | 2                                        | 3                                     | 4        | 5              |
| ...habe ich mich energisch und<br>aktiv gefühlt                 | 0                      | 1         | 2                                        | 3                                     | 4        | 5              |
| ...habe ich mich beim Aufwachen<br>frisch und ausgeruht gefühlt | 0                      | 1         | 2                                        | 3                                     | 4        | 5              |
| ...war mein Alltag voller Dinge,<br>die mich interessieren      | 0                      | 1         | 2                                        | 3                                     | 4        | 5              |

6. Tag: \_\_\_\_\_

Ketonkörper (mg/dl):  0  5  15  40  80  160

**Diät:**  800 kcal  1.200 kcal  1.800 kcal

Zusätze:  nein  Fisch

andere: \_\_\_\_\_

**Entlastungstag:**  Reis  Kartoffel/Gemüse

Früchte  andere: \_\_\_\_\_

**Fasten:** Honig  nein  ja

mittags: Saft (¼ l)  nein  ja

Gemüsebrühe (¼ l)  nein  ja

abends: Gemüsebrühe (¼ l)  nein  ja

Zusätze:  nein  Kousmine  Kousmine vegan

Joghurt  Haferschleim

Reisschleim  Karottensaft

grüner Tee  schwarzer Tee

andere: \_\_\_\_\_

**Fastenbrechen**

**Aufbautag:**  1  2  3  4

**Körperliches Befinden:**

sehr schlecht

|   |   |   |   |   |   |   |   |   |   |    |
|---|---|---|---|---|---|---|---|---|---|----|
| 0 | 1 | 2 | 3 | 4 | 5 | 6 | 7 | 8 | 9 | 10 |
|---|---|---|---|---|---|---|---|---|---|----|

hervorragend

**Psychisch-seelisches Befinden:**

sehr schlecht

|   |   |   |   |   |   |   |   |   |   |    |
|---|---|---|---|---|---|---|---|---|---|----|
| 0 | 1 | 2 | 3 | 4 | 5 | 6 | 7 | 8 | 9 | 10 |
|---|---|---|---|---|---|---|---|---|---|----|

hervorragend

**In der Klinik neu aufgetretene Beschwerden:**  nein  ja

- |                                                                   |                                          |
|-------------------------------------------------------------------|------------------------------------------|
| <input type="checkbox"/> Kopfschmerzen                            | <input type="checkbox"/> Muskelschmerzen |
| <input type="checkbox"/> Schlafstörungen                          | <input type="checkbox"/> Sodbrennen      |
| <input type="checkbox"/> Mundgeruch<br>(fragen Sie die Schwester) | <input type="checkbox"/> Übelkeit        |
| <input type="checkbox"/> Müdigkeit                                | <input type="checkbox"/> Trockener Mund  |
| <input type="checkbox"/> Rückenschmerzen                          | <input type="checkbox"/> Wadenkrämpfe    |
| <input type="checkbox"/> Kälteempfindlichkeit                     | <input type="checkbox"/> Durchfall       |
| <input type="checkbox"/> Schwindel                                | <input type="checkbox"/> Unruhige Beine  |
| <input type="checkbox"/> Hunger                                   | <input type="checkbox"/> Obstipation     |
| <input type="checkbox"/> Hautausschlag                            | <input type="checkbox"/> Herzklopfen     |
| <input type="checkbox"/> Blähungen                                | <input type="checkbox"/> Sehstörungen    |
| <input type="checkbox"/> sonstige: _____                          | <input type="checkbox"/> Essdrang        |

**Am heutigen Tag...**

|                                                                 | zu keinem<br>Zeitpunkt | ab und zu | etwas weniger als<br>die Hälfte der Zeit | etwas mehr als<br>die Hälfte der Zeit | meistens | die ganze Zeit |
|-----------------------------------------------------------------|------------------------|-----------|------------------------------------------|---------------------------------------|----------|----------------|
| ...war ich froh und guter Laune                                 | 0                      | 1         | 2                                        | 3                                     | 4        | 5              |
| ...habe ich mich ruhig und<br>entspannt gefühlt                 | 0                      | 1         | 2                                        | 3                                     | 4        | 5              |
| ...habe ich mich energisch und<br>aktiv gefühlt                 | 0                      | 1         | 2                                        | 3                                     | 4        | 5              |
| ...habe ich mich beim Aufwachen<br>frisch und ausgeruht gefühlt | 0                      | 1         | 2                                        | 3                                     | 4        | 5              |
| ...war mein Alltag voller Dinge,<br>die mich interessieren      | 0                      | 1         | 2                                        | 3                                     | 4        | 5              |

7. Tag: \_\_\_\_\_

Ketonkörper (mg/dl):  0  5  15  40  80  160

**Diät:**  800 kcal  1.200 kcal  1.800 kcal

Zusätze:  nein  Fisch

andere: \_\_\_\_\_

**Entlastungstag:**  Reis  Kartoffel/Gemüse

Früchte  andere: \_\_\_\_\_

**Fasten:** Honig  nein  ja

mittags: Saft (¼ l)  nein  ja

Gemüsebrühe (¼ l)  nein  ja

abends: Gemüsebrühe (¼ l)  nein  ja

Zusätze:  nein  Kousmine  Kousmine vegan

Joghurt  Haferschleim

Reisschleim  Karottensaft

grüner Tee  schwarzer Tee

andere: \_\_\_\_\_

**Fastenbrechen**

**Aufbautag:**  1  2  3  4

**Körperliches Befinden:**

sehr schlecht

|   |   |   |   |   |   |   |   |   |   |    |
|---|---|---|---|---|---|---|---|---|---|----|
| 0 | 1 | 2 | 3 | 4 | 5 | 6 | 7 | 8 | 9 | 10 |
|---|---|---|---|---|---|---|---|---|---|----|

hervorragend

**Psychisch-seelisches Befinden:**

sehr schlecht

|   |   |   |   |   |   |   |   |   |   |    |
|---|---|---|---|---|---|---|---|---|---|----|
| 0 | 1 | 2 | 3 | 4 | 5 | 6 | 7 | 8 | 9 | 10 |
|---|---|---|---|---|---|---|---|---|---|----|

hervorragend

**In der Klinik neu aufgetretene Beschwerden:**  nein  ja

- |                                                                   |                                          |
|-------------------------------------------------------------------|------------------------------------------|
| <input type="checkbox"/> Kopfschmerzen                            | <input type="checkbox"/> Muskelschmerzen |
| <input type="checkbox"/> Schlafstörungen                          | <input type="checkbox"/> Sodbrennen      |
| <input type="checkbox"/> Mundgeruch<br>(fragen Sie die Schwester) | <input type="checkbox"/> Übelkeit        |
| <input type="checkbox"/> Müdigkeit                                | <input type="checkbox"/> Trockener Mund  |
| <input type="checkbox"/> Rückenschmerzen                          | <input type="checkbox"/> Wadenkrämpfe    |
| <input type="checkbox"/> Kälteempfindlichkeit                     | <input type="checkbox"/> Durchfall       |
| <input type="checkbox"/> Schwindel                                | <input type="checkbox"/> Unruhige Beine  |
| <input type="checkbox"/> Hunger                                   | <input type="checkbox"/> Obstipation     |
| <input type="checkbox"/> Hautausschlag                            | <input type="checkbox"/> Herzklopfen     |
| <input type="checkbox"/> Blähungen                                | <input type="checkbox"/> Sehstörungen    |
| <input type="checkbox"/> sonstige: _____                          | <input type="checkbox"/> Essdrang        |

**Am heutigen Tag...**

|                                                              | zu keinem<br>Zeitpunkt | ab und zu | etwas weniger als<br>die Hälfte der Zeit | etwas mehr als<br>die Hälfte der Zeit | meistens | die ganze Zeit |
|--------------------------------------------------------------|------------------------|-----------|------------------------------------------|---------------------------------------|----------|----------------|
| ...war ich froh und guter Laune                              | 0                      | 1         | 2                                        | 3                                     | 4        | 5              |
| ...habe ich mich ruhig und entspannt gefühlt                 | 0                      | 1         | 2                                        | 3                                     | 4        | 5              |
| ...habe ich mich energisch und aktiv gefühlt                 | 0                      | 1         | 2                                        | 3                                     | 4        | 5              |
| ...habe ich mich beim Aufwachen frisch und ausgeruht gefühlt | 0                      | 1         | 2                                        | 3                                     | 4        | 5              |
| ...war mein Alltag voller Dinge, die mich interessieren      | 0                      | 1         | 2                                        | 3                                     | 4        | 5              |

## 8. Tag: \_\_\_\_\_

Ketonkörper (mg/dl):  0  5  15  40  80  160

**Diät:**  800 kcal  1.200 kcal  1.800 kcal

Zusätze:  nein  Fisch

andere: \_\_\_\_\_

**Entlastungstag:**  Reis  Kartoffel/Gemüse

Früchte  andere: \_\_\_\_\_

**Fasten:** Honig  nein  ja

mittags: Saft (¼ l)  nein  ja

Gemüsebrühe (¼ l)  nein  ja

abends: Gemüsebrühe (¼ l)  nein  ja

Zusätze:  nein  Kousmine  Kousmine vegan

Joghurt  Haferschleim

Reisschleim  Karottensaft

grüner Tee  schwarzer Tee

andere: \_\_\_\_\_

**Fastenbrechen**

**Aufbautag:**  1  2  3  4

### Körperliches Befinden:

sehr schlecht

|   |   |   |   |   |   |   |   |   |   |    |
|---|---|---|---|---|---|---|---|---|---|----|
| 0 | 1 | 2 | 3 | 4 | 5 | 6 | 7 | 8 | 9 | 10 |
|---|---|---|---|---|---|---|---|---|---|----|

hervorragend

### Psychisch-seelisches Befinden:

sehr schlecht

|   |   |   |   |   |   |   |   |   |   |    |
|---|---|---|---|---|---|---|---|---|---|----|
| 0 | 1 | 2 | 3 | 4 | 5 | 6 | 7 | 8 | 9 | 10 |
|---|---|---|---|---|---|---|---|---|---|----|

hervorragend

**In der Klinik neu aufgetretene Beschwerden:**  nein  ja

- |                                                                   |                                          |
|-------------------------------------------------------------------|------------------------------------------|
| <input type="checkbox"/> Kopfschmerzen                            | <input type="checkbox"/> Muskelschmerzen |
| <input type="checkbox"/> Schlafstörungen                          | <input type="checkbox"/> Sodbrennen      |
| <input type="checkbox"/> Mundgeruch<br>(fragen Sie die Schwester) | <input type="checkbox"/> Übelkeit        |
| <input type="checkbox"/> Müdigkeit                                | <input type="checkbox"/> Trockener Mund  |
| <input type="checkbox"/> Rückenschmerzen                          | <input type="checkbox"/> Wadenkrämpfe    |
| <input type="checkbox"/> Kälteempfindlichkeit                     | <input type="checkbox"/> Durchfall       |
| <input type="checkbox"/> Schwindel                                | <input type="checkbox"/> Unruhige Beine  |
| <input type="checkbox"/> Hunger                                   | <input type="checkbox"/> Obstipation     |
| <input type="checkbox"/> Hautausschlag                            | <input type="checkbox"/> Herzklopfen     |
| <input type="checkbox"/> Blähungen                                | <input type="checkbox"/> Sehstörungen    |
| <input type="checkbox"/> sonstige: _____                          | <input type="checkbox"/> Essdrang        |

**Am heutigen Tag...**

|                                                              | zu keinem<br>Zeitpunkt | ab und zu | etwas weniger als<br>die Hälfte der Zeit | etwas mehr als<br>die Hälfte der Zeit | meistens | die ganze Zeit |
|--------------------------------------------------------------|------------------------|-----------|------------------------------------------|---------------------------------------|----------|----------------|
| ...war ich froh und guter Laune                              | 0                      | 1         | 2                                        | 3                                     | 4        | 5              |
| ...habe ich mich ruhig und entspannt gefühlt                 | 0                      | 1         | 2                                        | 3                                     | 4        | 5              |
| ...habe ich mich energisch und aktiv gefühlt                 | 0                      | 1         | 2                                        | 3                                     | 4        | 5              |
| ...habe ich mich beim Aufwachen frisch und ausgeruht gefühlt | 0                      | 1         | 2                                        | 3                                     | 4        | 5              |
| ...war mein Alltag voller Dinge, die mich interessieren      | 0                      | 1         | 2                                        | 3                                     | 4        | 5              |

9. Tag: \_\_\_\_\_

Ketonkörper (mg/dl):  0  5  15  40  80  160

**Diät:**  800 kcal  1.200 kcal  1.800 kcal

Zusätze:  nein  Fisch

andere: \_\_\_\_\_

**Entlastungstag:**  Reis  Kartoffel/Gemüse

Früchte  andere: \_\_\_\_\_

**Fasten:** Honig  nein  ja

mittags: Saft (¼ l)  nein  ja

Gemüsebrühe (¼ l)  nein  ja

abends: Gemüsebrühe (¼ l)  nein  ja

Zusätze:  nein  Kousmine  Kousmine vegan

Joghurt  Haferschleim

Reisschleim  Karottensaft

grüner Tee  schwarzer Tee

andere: \_\_\_\_\_

**Fastenbrechen**

**Aufbautag:**  1  2  3  4

**Körperliches Befinden:**

sehr schlecht

|   |   |   |   |   |   |   |   |   |   |    |
|---|---|---|---|---|---|---|---|---|---|----|
| 0 | 1 | 2 | 3 | 4 | 5 | 6 | 7 | 8 | 9 | 10 |
|---|---|---|---|---|---|---|---|---|---|----|

hervorragend

**Psychisch-seelisches Befinden:**

sehr schlecht

|   |   |   |   |   |   |   |   |   |   |    |
|---|---|---|---|---|---|---|---|---|---|----|
| 0 | 1 | 2 | 3 | 4 | 5 | 6 | 7 | 8 | 9 | 10 |
|---|---|---|---|---|---|---|---|---|---|----|

hervorragend



**In der Klinik neu aufgetretene Beschwerden:**  nein  ja

- |                                                                   |                                          |
|-------------------------------------------------------------------|------------------------------------------|
| <input type="checkbox"/> Kopfschmerzen                            | <input type="checkbox"/> Muskelschmerzen |
| <input type="checkbox"/> Schlafstörungen                          | <input type="checkbox"/> Sodbrennen      |
| <input type="checkbox"/> Mundgeruch<br>(fragen Sie die Schwester) | <input type="checkbox"/> Übelkeit        |
| <input type="checkbox"/> Müdigkeit                                | <input type="checkbox"/> Trockener Mund  |
| <input type="checkbox"/> Rückenschmerzen                          | <input type="checkbox"/> Wadenkrämpfe    |
| <input type="checkbox"/> Kälteempfindlichkeit                     | <input type="checkbox"/> Durchfall       |
| <input type="checkbox"/> Schwindel                                | <input type="checkbox"/> Unruhige Beine  |
| <input type="checkbox"/> Hunger                                   | <input type="checkbox"/> Obstipation     |
| <input type="checkbox"/> Hautausschlag                            | <input type="checkbox"/> Herzklopfen     |
| <input type="checkbox"/> Blähungen                                | <input type="checkbox"/> Sehstörungen    |
| <input type="checkbox"/> sonstige: _____                          | <input type="checkbox"/> Essdrang        |

**Am heutigen Tag...**

|                                                                 | zu keinem<br>Zeitpunkt | ab und zu | etwas weniger als<br>die Hälfte der Zeit | etwas mehr als<br>die Hälfte der Zeit | meistens | die ganze Zeit |
|-----------------------------------------------------------------|------------------------|-----------|------------------------------------------|---------------------------------------|----------|----------------|
| ...war ich froh und guter Laune                                 | 0                      | 1         | 2                                        | 3                                     | 4        | 5              |
| ...habe ich mich ruhig und<br>entspannt gefühlt                 | 0                      | 1         | 2                                        | 3                                     | 4        | 5              |
| ...habe ich mich energisch und<br>aktiv gefühlt                 | 0                      | 1         | 2                                        | 3                                     | 4        | 5              |
| ...habe ich mich beim Aufwachen<br>frisch und ausgeruht gefühlt | 0                      | 1         | 2                                        | 3                                     | 4        | 5              |
| ...war mein Alltag voller Dinge,<br>die mich interessieren      | 0                      | 1         | 2                                        | 3                                     | 4        | 5              |

## 10. Tag: \_\_\_\_\_

Ketonkörper (mg/dl):  0  5  15  40  80  160

**Diät:**  800 kcal  1.200 kcal  1.800 kcal

Zusätze:  nein  Fisch

andere: \_\_\_\_\_

**Entlastungstag:**  Reis  Kartoffel/Gemüse

Früchte  andere: \_\_\_\_\_

**Fasten:** Honig  nein  ja

mittags: Saft (¼ l)  nein  ja

Gemüsebrühe (¼ l)  nein  ja

abends: Gemüsebrühe (¼ l)  nein  ja

Zusätze:  nein  Kousmine  Kousmine vegan

Joghurt  Haferschleim

Reisschleim  Karottensaft

grüner Tee  schwarzer Tee

andere: \_\_\_\_\_

**Fastenbrechen**

**Aufbautag:**  1  2  3  4

### Körperliches Befinden:

sehr schlecht

|   |   |   |   |   |   |   |   |   |   |    |
|---|---|---|---|---|---|---|---|---|---|----|
| 0 | 1 | 2 | 3 | 4 | 5 | 6 | 7 | 8 | 9 | 10 |
|---|---|---|---|---|---|---|---|---|---|----|

hervorragend

### Psychisch-seelisches Befinden:

sehr schlecht

|   |   |   |   |   |   |   |   |   |   |    |
|---|---|---|---|---|---|---|---|---|---|----|
| 0 | 1 | 2 | 3 | 4 | 5 | 6 | 7 | 8 | 9 | 10 |
|---|---|---|---|---|---|---|---|---|---|----|

hervorragend

**In der Klinik neu aufgetretene Beschwerden:**  nein  ja

- |                                                                   |                                          |
|-------------------------------------------------------------------|------------------------------------------|
| <input type="checkbox"/> Kopfschmerzen                            | <input type="checkbox"/> Muskelschmerzen |
| <input type="checkbox"/> Schlafstörungen                          | <input type="checkbox"/> Sodbrennen      |
| <input type="checkbox"/> Mundgeruch<br>(fragen Sie die Schwester) | <input type="checkbox"/> Übelkeit        |
| <input type="checkbox"/> Müdigkeit                                | <input type="checkbox"/> Trockener Mund  |
| <input type="checkbox"/> Rückenschmerzen                          | <input type="checkbox"/> Wadenkrämpfe    |
| <input type="checkbox"/> Kälteempfindlichkeit                     | <input type="checkbox"/> Durchfall       |
| <input type="checkbox"/> Schwindel                                | <input type="checkbox"/> Unruhige Beine  |
| <input type="checkbox"/> Hunger                                   | <input type="checkbox"/> Obstipation     |
| <input type="checkbox"/> Hautausschlag                            | <input type="checkbox"/> Herzklopfen     |
| <input type="checkbox"/> Blähungen                                | <input type="checkbox"/> Sehstörungen    |
| <input type="checkbox"/> sonstige: _____                          | <input type="checkbox"/> Essdrang        |

**Am heutigen Tag...**

|                                                              | zu keinem<br>Zeitpunkt | ab und zu | etwas weniger als<br>die Hälfte der Zeit | etwas mehr als<br>die Hälfte der Zeit | meistens | die ganze Zeit |
|--------------------------------------------------------------|------------------------|-----------|------------------------------------------|---------------------------------------|----------|----------------|
| ...war ich froh und guter Laune                              | 0                      | 1         | 2                                        | 3                                     | 4        | 5              |
| ...habe ich mich ruhig und entspannt gefühlt                 | 0                      | 1         | 2                                        | 3                                     | 4        | 5              |
| ...habe ich mich energisch und aktiv gefühlt                 | 0                      | 1         | 2                                        | 3                                     | 4        | 5              |
| ...habe ich mich beim Aufwachen frisch und ausgeruht gefühlt | 0                      | 1         | 2                                        | 3                                     | 4        | 5              |
| ...war mein Alltag voller Dinge, die mich interessieren      | 0                      | 1         | 2                                        | 3                                     | 4        | 5              |

## 11. Tag: \_\_\_\_\_

Ketonkörper (mg/dl):  0  5  15  40  80  160

**Diät:**  800 kcal  1.200 kcal  1.800 kcal

Zusätze:  nein  Fisch

andere: \_\_\_\_\_

**Entlastungstag:**  Reis  Kartoffel/Gemüse

Früchte  andere: \_\_\_\_\_

**Fasten:** Honig  nein  ja

mittags: Saft (¼ l)  nein  ja

Gemüsebrühe (¼ l)  nein  ja

abends: Gemüsebrühe (¼ l)  nein  ja

Zusätze:  nein  Kousmine  Kousmine vegan

Joghurt  Haferschleim

Reisschleim  Karottensaft

grüner Tee  schwarzer Tee

andere: \_\_\_\_\_

**Fastenbrechen**

**Aufbautag:**  1  2  3  4

**Körperliches Befinden:**

sehr schlecht

|   |   |   |   |   |   |   |   |   |   |    |
|---|---|---|---|---|---|---|---|---|---|----|
| 0 | 1 | 2 | 3 | 4 | 5 | 6 | 7 | 8 | 9 | 10 |
|---|---|---|---|---|---|---|---|---|---|----|

hervorragend

**Psychisch-seelisches Befinden:**

sehr schlecht

|   |   |   |   |   |   |   |   |   |   |    |
|---|---|---|---|---|---|---|---|---|---|----|
| 0 | 1 | 2 | 3 | 4 | 5 | 6 | 7 | 8 | 9 | 10 |
|---|---|---|---|---|---|---|---|---|---|----|

hervorragend

**In der Klinik neu aufgetretene Beschwerden:**  nein  ja

- |                                                                   |                                          |
|-------------------------------------------------------------------|------------------------------------------|
| <input type="checkbox"/> Kopfschmerzen                            | <input type="checkbox"/> Muskelschmerzen |
| <input type="checkbox"/> Schlafstörungen                          | <input type="checkbox"/> Sodbrennen      |
| <input type="checkbox"/> Mundgeruch<br>(fragen Sie die Schwester) | <input type="checkbox"/> Übelkeit        |
| <input type="checkbox"/> Müdigkeit                                | <input type="checkbox"/> Trockener Mund  |
| <input type="checkbox"/> Rückenschmerzen                          | <input type="checkbox"/> Wadenkrämpfe    |
| <input type="checkbox"/> Kälteempfindlichkeit                     | <input type="checkbox"/> Durchfall       |
| <input type="checkbox"/> Schwindel                                | <input type="checkbox"/> Unruhige Beine  |
| <input type="checkbox"/> Hunger                                   | <input type="checkbox"/> Obstipation     |
| <input type="checkbox"/> Hautausschlag                            | <input type="checkbox"/> Herzklopfen     |
| <input type="checkbox"/> Blähungen                                | <input type="checkbox"/> Sehstörungen    |
| <input type="checkbox"/> sonstige: _____                          | <input type="checkbox"/> Essdrang        |

**Am heutigen Tag...**

|                                                              | zu keinem<br>Zeitpunkt | ab und zu | etwas weniger als<br>die Hälfte der Zeit | etwas mehr als<br>die Hälfte der Zeit | meistens | die ganze Zeit |
|--------------------------------------------------------------|------------------------|-----------|------------------------------------------|---------------------------------------|----------|----------------|
| ...war ich froh und guter Laune                              | 0                      | 1         | 2                                        | 3                                     | 4        | 5              |
| ...habe ich mich ruhig und entspannt gefühlt                 | 0                      | 1         | 2                                        | 3                                     | 4        | 5              |
| ...habe ich mich energisch und aktiv gefühlt                 | 0                      | 1         | 2                                        | 3                                     | 4        | 5              |
| ...habe ich mich beim Aufwachen frisch und ausgeruht gefühlt | 0                      | 1         | 2                                        | 3                                     | 4        | 5              |
| ...war mein Alltag voller Dinge, die mich interessieren      | 0                      | 1         | 2                                        | 3                                     | 4        | 5              |

## 12. Tag: \_\_\_\_\_

Ketonkörper (mg/dl):  0  5  15  40  80  160

**Diät:**  800 kcal  1.200 kcal  1.800 kcal

Zusätze:  nein  Fisch

andere: \_\_\_\_\_

**Entlastungstag:**  Reis  Kartoffel/Gemüse

Früchte  andere: \_\_\_\_\_

**Fasten:** Honig  nein  ja

mittags: Saft (¼ l)  nein  ja

Gemüsebrühe (¼ l)  nein  ja

abends: Gemüsebrühe (¼ l)  nein  ja

Zusätze:  nein  Kousmine  Kousmine vegan

Joghurt  Haferschleim

Reisschleim  Karottensaft

grüner Tee  schwarzer Tee

andere: \_\_\_\_\_

**Fastenbrechen**

**Aufbautag:**  1  2  3  4

### Körperliches Befinden:

sehr schlecht

|   |   |   |   |   |   |   |   |   |   |    |
|---|---|---|---|---|---|---|---|---|---|----|
| 0 | 1 | 2 | 3 | 4 | 5 | 6 | 7 | 8 | 9 | 10 |
|---|---|---|---|---|---|---|---|---|---|----|

hervorragend

### Psychisch-seelisches Befinden:

sehr schlecht

|   |   |   |   |   |   |   |   |   |   |    |
|---|---|---|---|---|---|---|---|---|---|----|
| 0 | 1 | 2 | 3 | 4 | 5 | 6 | 7 | 8 | 9 | 10 |
|---|---|---|---|---|---|---|---|---|---|----|

hervorragend

**In der Klinik neu aufgetretene Beschwerden:**  nein  ja

- |                                                                   |                                          |
|-------------------------------------------------------------------|------------------------------------------|
| <input type="checkbox"/> Kopfschmerzen                            | <input type="checkbox"/> Muskelschmerzen |
| <input type="checkbox"/> Schlafstörungen                          | <input type="checkbox"/> Sodbrennen      |
| <input type="checkbox"/> Mundgeruch<br>(fragen Sie die Schwester) | <input type="checkbox"/> Übelkeit        |
| <input type="checkbox"/> Müdigkeit                                | <input type="checkbox"/> Trockener Mund  |
| <input type="checkbox"/> Rückenschmerzen                          | <input type="checkbox"/> Wadenkrämpfe    |
| <input type="checkbox"/> Kälteempfindlichkeit                     | <input type="checkbox"/> Durchfall       |
| <input type="checkbox"/> Schwindel                                | <input type="checkbox"/> Unruhige Beine  |
| <input type="checkbox"/> Hunger                                   | <input type="checkbox"/> Obstipation     |
| <input type="checkbox"/> Hautausschlag                            | <input type="checkbox"/> Herzklopfen     |
| <input type="checkbox"/> Blähungen                                | <input type="checkbox"/> Sehstörungen    |
| <input type="checkbox"/> sonstige: _____                          | <input type="checkbox"/> Essdrang        |

**Am heutigen Tag...**

|                                                                 | zu keinem<br>Zeitpunkt | ab und zu | etwas weniger als<br>die Hälfte der Zeit | etwas mehr als<br>die Hälfte der Zeit | meistens | die ganze Zeit |
|-----------------------------------------------------------------|------------------------|-----------|------------------------------------------|---------------------------------------|----------|----------------|
| ...war ich froh und guter Laune                                 | 0                      | 1         | 2                                        | 3                                     | 4        | 5              |
| ...habe ich mich ruhig und<br>entspannt gefühlt                 | 0                      | 1         | 2                                        | 3                                     | 4        | 5              |
| ...habe ich mich energisch und<br>aktiv gefühlt                 | 0                      | 1         | 2                                        | 3                                     | 4        | 5              |
| ...habe ich mich beim Aufwachen<br>frisch und ausgeruht gefühlt | 0                      | 1         | 2                                        | 3                                     | 4        | 5              |
| ...war mein Alltag voller Dinge,<br>die mich interessieren      | 0                      | 1         | 2                                        | 3                                     | 4        | 5              |

### 13. Tag: \_\_\_\_\_

Ketonkörper (mg/dl):  0  5  15  40  80  160

**Diät:**  800 kcal  1.200 kcal  1.800 kcal

Zusätze:  nein  Fisch

andere: \_\_\_\_\_

**Entlastungstag:**  Reis  Kartoffel/Gemüse

Früchte  andere: \_\_\_\_\_

**Fasten:** Honig  nein  ja

mittags: Saft (¼ l)  nein  ja

Gemüsebrühe (¼ l)  nein  ja

abends: Gemüsebrühe (¼ l)  nein  ja

Zusätze:  nein  Kousmine  Kousmine vegan

Joghurt  Haferschleim

Reisschleim  Karottensaft

grüner Tee  schwarzer Tee

andere: \_\_\_\_\_

**Fastenbrechen**

**Aufbautag:**  1  2  3  4

### Körperliches Befinden:

sehr schlecht

|   |   |   |   |   |   |   |   |   |   |    |
|---|---|---|---|---|---|---|---|---|---|----|
| 0 | 1 | 2 | 3 | 4 | 5 | 6 | 7 | 8 | 9 | 10 |
|---|---|---|---|---|---|---|---|---|---|----|

hervorragend

### Psychisch-seelisches Befinden:

sehr schlecht

|   |   |   |   |   |   |   |   |   |   |    |
|---|---|---|---|---|---|---|---|---|---|----|
| 0 | 1 | 2 | 3 | 4 | 5 | 6 | 7 | 8 | 9 | 10 |
|---|---|---|---|---|---|---|---|---|---|----|

hervorragend



**In der Klinik neu aufgetretene Beschwerden:**  nein  ja

- |                                                                   |                                          |
|-------------------------------------------------------------------|------------------------------------------|
| <input type="checkbox"/> Kopfschmerzen                            | <input type="checkbox"/> Muskelschmerzen |
| <input type="checkbox"/> Schlafstörungen                          | <input type="checkbox"/> Sodbrennen      |
| <input type="checkbox"/> Mundgeruch<br>(fragen Sie die Schwester) | <input type="checkbox"/> Übelkeit        |
| <input type="checkbox"/> Müdigkeit                                | <input type="checkbox"/> Trockener Mund  |
| <input type="checkbox"/> Rückenschmerzen                          | <input type="checkbox"/> Wadenkrämpfe    |
| <input type="checkbox"/> Kälteempfindlichkeit                     | <input type="checkbox"/> Durchfall       |
| <input type="checkbox"/> Schwindel                                | <input type="checkbox"/> Unruhige Beine  |
| <input type="checkbox"/> Hunger                                   | <input type="checkbox"/> Obstipation     |
| <input type="checkbox"/> Hautausschlag                            | <input type="checkbox"/> Herzklopfen     |
| <input type="checkbox"/> Blähungen                                | <input type="checkbox"/> Sehstörungen    |
| <input type="checkbox"/> sonstige: _____                          | <input type="checkbox"/> Essdrang        |

**Am heutigen Tag...**

|                                                              | zu keinem<br>Zeitpunkt | ab und zu | etwas weniger als<br>die Hälfte der Zeit | etwas mehr als<br>die Hälfte der Zeit | meistens | die ganze Zeit |
|--------------------------------------------------------------|------------------------|-----------|------------------------------------------|---------------------------------------|----------|----------------|
| ...war ich froh und guter Laune                              | 0                      | 1         | 2                                        | 3                                     | 4        | 5              |
| ...habe ich mich ruhig und entspannt gefühlt                 | 0                      | 1         | 2                                        | 3                                     | 4        | 5              |
| ...habe ich mich energisch und aktiv gefühlt                 | 0                      | 1         | 2                                        | 3                                     | 4        | 5              |
| ...habe ich mich beim Aufwachen frisch und ausgeruht gefühlt | 0                      | 1         | 2                                        | 3                                     | 4        | 5              |
| ...war mein Alltag voller Dinge, die mich interessieren      | 0                      | 1         | 2                                        | 3                                     | 4        | 5              |

## 14. Tag: \_\_\_\_\_

Ketonkörper (mg/dl):  0  5  15  40  80  160

**Diät:**  800 kcal  1.200 kcal  1.800 kcal

Zusätze:  nein  Fisch

andere: \_\_\_\_\_

**Entlastungstag:**  Reis  Kartoffel/Gemüse

Früchte  andere: \_\_\_\_\_

**Fasten:** Honig  nein  ja

mittags: Saft (¼ l)  nein  ja

Gemüsebrühe (¼ l)  nein  ja

abends: Gemüsebrühe (¼ l)  nein  ja

Zusätze:  nein  Kousmine  Kousmine vegan

Joghurt  Haferschleim

Reisschleim  Karottensaft

grüner Tee  schwarzer Tee

andere: \_\_\_\_\_

**Fastenbrechen**

**Aufbautag:**  1  2  3  4

### Körperliches Befinden:

sehr schlecht

|   |   |   |   |   |   |   |   |   |   |    |
|---|---|---|---|---|---|---|---|---|---|----|
| 0 | 1 | 2 | 3 | 4 | 5 | 6 | 7 | 8 | 9 | 10 |
|---|---|---|---|---|---|---|---|---|---|----|

hervorragend

### Psychisch-seelisches Befinden:

sehr schlecht

|   |   |   |   |   |   |   |   |   |   |    |
|---|---|---|---|---|---|---|---|---|---|----|
| 0 | 1 | 2 | 3 | 4 | 5 | 6 | 7 | 8 | 9 | 10 |
|---|---|---|---|---|---|---|---|---|---|----|

hervorragend

**In der Klinik neu aufgetretene Beschwerden:**  nein  ja

- |                                                                   |                                          |
|-------------------------------------------------------------------|------------------------------------------|
| <input type="checkbox"/> Kopfschmerzen                            | <input type="checkbox"/> Muskelschmerzen |
| <input type="checkbox"/> Schlafstörungen                          | <input type="checkbox"/> Sodbrennen      |
| <input type="checkbox"/> Mundgeruch<br>(fragen Sie die Schwester) | <input type="checkbox"/> Übelkeit        |
| <input type="checkbox"/> Müdigkeit                                | <input type="checkbox"/> Trockener Mund  |
| <input type="checkbox"/> Rückenschmerzen                          | <input type="checkbox"/> Wadenkrämpfe    |
| <input type="checkbox"/> Kälteempfindlichkeit                     | <input type="checkbox"/> Durchfall       |
| <input type="checkbox"/> Schwindel                                | <input type="checkbox"/> Unruhige Beine  |
| <input type="checkbox"/> Hunger                                   | <input type="checkbox"/> Obstipation     |
| <input type="checkbox"/> Hautausschlag                            | <input type="checkbox"/> Herzklopfen     |
| <input type="checkbox"/> Blähungen                                | <input type="checkbox"/> Sehstörungen    |
| <input type="checkbox"/> sonstige: _____                          | <input type="checkbox"/> Essdrang        |

**Am heutigen Tag...**

|                                                                 | zu keinem<br>Zeitpunkt | ab und zu | etwas weniger als<br>die Hälfte der Zeit | etwas mehr als<br>die Hälfte der Zeit | meistens | die ganze Zeit |
|-----------------------------------------------------------------|------------------------|-----------|------------------------------------------|---------------------------------------|----------|----------------|
| ...war ich froh und guter Laune                                 | 0                      | 1         | 2                                        | 3                                     | 4        | 5              |
| ...habe ich mich ruhig und<br>entspannt gefühlt                 | 0                      | 1         | 2                                        | 3                                     | 4        | 5              |
| ...habe ich mich energisch und<br>aktiv gefühlt                 | 0                      | 1         | 2                                        | 3                                     | 4        | 5              |
| ...habe ich mich beim Aufwachen<br>frisch und ausgeruht gefühlt | 0                      | 1         | 2                                        | 3                                     | 4        | 5              |
| ...war mein Alltag voller Dinge,<br>die mich interessieren      | 0                      | 1         | 2                                        | 3                                     | 4        | 5              |

## 15. Tag: \_\_\_\_\_

Ketonkörper (mg/dl):  0  5  15  40  80  160

**Diät:**  800 kcal  1.200 kcal  1.800 kcal

Zusätze:  nein  Fisch

andere: \_\_\_\_\_

**Entlastungstag:**  Reis  Kartoffel/Gemüse

Früchte  andere: \_\_\_\_\_

**Fasten:** Honig  nein  ja

mittags: Saft (¼ l)  nein  ja

Gemüsebrühe (¼ l)  nein  ja

abends: Gemüsebrühe (¼ l)  nein  ja

Zusätze:  nein  Kousmine  Kousmine vegan

Joghurt  Haferschleim

Reisschleim  Karottensaft

grüner Tee  schwarzer Tee

andere: \_\_\_\_\_

**Fastenbrechen**

**Aufbautag:**  1  2  3  4

### Körperliches Befinden:

sehr schlecht

|   |   |   |   |   |   |   |   |   |   |    |
|---|---|---|---|---|---|---|---|---|---|----|
| 0 | 1 | 2 | 3 | 4 | 5 | 6 | 7 | 8 | 9 | 10 |
|---|---|---|---|---|---|---|---|---|---|----|

hervorragend

### Psychisch-seelisches Befinden:

sehr schlecht

|   |   |   |   |   |   |   |   |   |   |    |
|---|---|---|---|---|---|---|---|---|---|----|
| 0 | 1 | 2 | 3 | 4 | 5 | 6 | 7 | 8 | 9 | 10 |
|---|---|---|---|---|---|---|---|---|---|----|

hervorragend

**In der Klinik neu aufgetretene Beschwerden:**  nein  ja

- |                                                                   |                                          |
|-------------------------------------------------------------------|------------------------------------------|
| <input type="checkbox"/> Kopfschmerzen                            | <input type="checkbox"/> Muskelschmerzen |
| <input type="checkbox"/> Schlafstörungen                          | <input type="checkbox"/> Sodbrennen      |
| <input type="checkbox"/> Mundgeruch<br>(fragen Sie die Schwester) | <input type="checkbox"/> Übelkeit        |
| <input type="checkbox"/> Müdigkeit                                | <input type="checkbox"/> Trockener Mund  |
| <input type="checkbox"/> Rückenschmerzen                          | <input type="checkbox"/> Wadenkrämpfe    |
| <input type="checkbox"/> Kälteempfindlichkeit                     | <input type="checkbox"/> Durchfall       |
| <input type="checkbox"/> Schwindel                                | <input type="checkbox"/> Unruhige Beine  |
| <input type="checkbox"/> Hunger                                   | <input type="checkbox"/> Obstipation     |
| <input type="checkbox"/> Hautausschlag                            | <input type="checkbox"/> Herzklopfen     |
| <input type="checkbox"/> Blähungen                                | <input type="checkbox"/> Sehstörungen    |
| <input type="checkbox"/> sonstige: _____                          | <input type="checkbox"/> Essdrang        |

**Am heutigen Tag...**

|                                                                 | zu keinem<br>Zeitpunkt | ab und zu | etwas weniger als<br>die Hälfte der Zeit | etwas mehr als<br>die Hälfte der Zeit | meistens | die ganze Zeit |
|-----------------------------------------------------------------|------------------------|-----------|------------------------------------------|---------------------------------------|----------|----------------|
| ...war ich froh und guter Laune                                 | 0                      | 1         | 2                                        | 3                                     | 4        | 5              |
| ...habe ich mich ruhig und<br>entspannt gefühlt                 | 0                      | 1         | 2                                        | 3                                     | 4        | 5              |
| ...habe ich mich energisch und<br>aktiv gefühlt                 | 0                      | 1         | 2                                        | 3                                     | 4        | 5              |
| ...habe ich mich beim Aufwachen<br>frisch und ausgeruht gefühlt | 0                      | 1         | 2                                        | 3                                     | 4        | 5              |
| ...war mein Alltag voller Dinge,<br>die mich interessieren      | 0                      | 1         | 2                                        | 3                                     | 4        | 5              |

## 16. Tag: \_\_\_\_\_

Ketonkörper (mg/dl):  0  5  15  40  80  160

**Diät:**  800 kcal  1.200 kcal  1.800 kcal

Zusätze:  nein  Fisch

andere: \_\_\_\_\_

**Entlastungstag:**  Reis  Kartoffel/Gemüse

Früchte  andere: \_\_\_\_\_

**Fasten:** Honig  nein  ja

mittags: Saft (¼ l)  nein  ja

Gemüsebrühe (¼ l)  nein  ja

abends: Gemüsebrühe (¼ l)  nein  ja

Zusätze:  nein  Kousmine  Kousmine vegan

Joghurt  Haferschleim

Reisschleim  Karottensaft

grüner Tee  schwarzer Tee

andere: \_\_\_\_\_

**Fastenbrechen**

**Aufbautag:**  1  2  3  4

### Körperliches Befinden:

sehr schlecht

|   |   |   |   |   |   |   |   |   |   |    |
|---|---|---|---|---|---|---|---|---|---|----|
| 0 | 1 | 2 | 3 | 4 | 5 | 6 | 7 | 8 | 9 | 10 |
|---|---|---|---|---|---|---|---|---|---|----|

hervorragend

### Psychisch-seelisches Befinden:

sehr schlecht

|   |   |   |   |   |   |   |   |   |   |    |
|---|---|---|---|---|---|---|---|---|---|----|
| 0 | 1 | 2 | 3 | 4 | 5 | 6 | 7 | 8 | 9 | 10 |
|---|---|---|---|---|---|---|---|---|---|----|

hervorragend

**In der Klinik neu aufgetretene Beschwerden:**  nein  ja

- |                                                                   |                                          |
|-------------------------------------------------------------------|------------------------------------------|
| <input type="checkbox"/> Kopfschmerzen                            | <input type="checkbox"/> Muskelschmerzen |
| <input type="checkbox"/> Schlafstörungen                          | <input type="checkbox"/> Sodbrennen      |
| <input type="checkbox"/> Mundgeruch<br>(fragen Sie die Schwester) | <input type="checkbox"/> Übelkeit        |
| <input type="checkbox"/> Müdigkeit                                | <input type="checkbox"/> Trockener Mund  |
| <input type="checkbox"/> Rückenschmerzen                          | <input type="checkbox"/> Wadenkrämpfe    |
| <input type="checkbox"/> Kälteempfindlichkeit                     | <input type="checkbox"/> Durchfall       |
| <input type="checkbox"/> Schwindel                                | <input type="checkbox"/> Unruhige Beine  |
| <input type="checkbox"/> Hunger                                   | <input type="checkbox"/> Obstipation     |
| <input type="checkbox"/> Hautausschlag                            | <input type="checkbox"/> Herzklopfen     |
| <input type="checkbox"/> Blähungen                                | <input type="checkbox"/> Sehstörungen    |
| <input type="checkbox"/> sonstige: _____                          | <input type="checkbox"/> Essdrang        |

**Am heutigen Tag...**

|                                                                 | zu keinem<br>Zeitpunkt | ab und zu | etwas weniger als<br>die Hälfte der Zeit | etwas mehr als<br>die Hälfte der Zeit | meistens | die ganze Zeit |
|-----------------------------------------------------------------|------------------------|-----------|------------------------------------------|---------------------------------------|----------|----------------|
| ...war ich froh und guter Laune                                 | 0                      | 1         | 2                                        | 3                                     | 4        | 5              |
| ...habe ich mich ruhig und<br>entspannt gefühlt                 | 0                      | 1         | 2                                        | 3                                     | 4        | 5              |
| ...habe ich mich energisch und<br>aktiv gefühlt                 | 0                      | 1         | 2                                        | 3                                     | 4        | 5              |
| ...habe ich mich beim Aufwachen<br>frisch und ausgeruht gefühlt | 0                      | 1         | 2                                        | 3                                     | 4        | 5              |
| ...war mein Alltag voller Dinge,<br>die mich interessieren      | 0                      | 1         | 2                                        | 3                                     | 4        | 5              |

## 17. Tag: \_\_\_\_\_

Ketonkörper (mg/dl):  0  5  15  40  80  160

**Diät:**  800 kcal  1.200 kcal  1.800 kcal

Zusätze:  nein  Fisch

andere: \_\_\_\_\_

**Entlastungstag:**  Reis  Kartoffel/Gemüse

Früchte  andere: \_\_\_\_\_

**Fasten:** Honig  nein  ja

mittags: Saft (¼ l)  nein  ja

Gemüsebrühe (¼ l)  nein  ja

abends: Gemüsebrühe (¼ l)  nein  ja

Zusätze:  nein  Kousmine  Kousmine vegan

Joghurt  Haferschleim

Reisschleim  Karottensaft

grüner Tee  schwarzer Tee

andere: \_\_\_\_\_

**Fastenbrechen**

**Aufbautag:**  1  2  3  4

### Körperliches Befinden:

sehr schlecht

|   |   |   |   |   |   |   |   |   |   |    |
|---|---|---|---|---|---|---|---|---|---|----|
| 0 | 1 | 2 | 3 | 4 | 5 | 6 | 7 | 8 | 9 | 10 |
|---|---|---|---|---|---|---|---|---|---|----|

hervorragend

### Psychisch-seelisches Befinden:

sehr schlecht

|   |   |   |   |   |   |   |   |   |   |    |
|---|---|---|---|---|---|---|---|---|---|----|
| 0 | 1 | 2 | 3 | 4 | 5 | 6 | 7 | 8 | 9 | 10 |
|---|---|---|---|---|---|---|---|---|---|----|

hervorragend



**In der Klinik neu aufgetretene Beschwerden:**  nein  ja

- |                                                                   |                                          |
|-------------------------------------------------------------------|------------------------------------------|
| <input type="checkbox"/> Kopfschmerzen                            | <input type="checkbox"/> Muskelschmerzen |
| <input type="checkbox"/> Schlafstörungen                          | <input type="checkbox"/> Sodbrennen      |
| <input type="checkbox"/> Mundgeruch<br>(fragen Sie die Schwester) | <input type="checkbox"/> Übelkeit        |
| <input type="checkbox"/> Müdigkeit                                | <input type="checkbox"/> Trockener Mund  |
| <input type="checkbox"/> Rückenschmerzen                          | <input type="checkbox"/> Wadenkrämpfe    |
| <input type="checkbox"/> Kälteempfindlichkeit                     | <input type="checkbox"/> Durchfall       |
| <input type="checkbox"/> Schwindel                                | <input type="checkbox"/> Unruhige Beine  |
| <input type="checkbox"/> Hunger                                   | <input type="checkbox"/> Obstipation     |
| <input type="checkbox"/> Hautausschlag                            | <input type="checkbox"/> Herzklopfen     |
| <input type="checkbox"/> Blähungen                                | <input type="checkbox"/> Sehstörungen    |
| <input type="checkbox"/> sonstige: _____                          | <input type="checkbox"/> Essdrang        |

**Am heutigen Tag...**

|                                                              | zu keinem<br>Zeitpunkt | ab und zu | etwas weniger als<br>die Hälfte der Zeit | etwas mehr als<br>die Hälfte der Zeit | meistens | die ganze Zeit |
|--------------------------------------------------------------|------------------------|-----------|------------------------------------------|---------------------------------------|----------|----------------|
| ...war ich froh und guter Laune                              | 0                      | 1         | 2                                        | 3                                     | 4        | 5              |
| ...habe ich mich ruhig und entspannt gefühlt                 | 0                      | 1         | 2                                        | 3                                     | 4        | 5              |
| ...habe ich mich energisch und aktiv gefühlt                 | 0                      | 1         | 2                                        | 3                                     | 4        | 5              |
| ...habe ich mich beim Aufwachen frisch und ausgeruht gefühlt | 0                      | 1         | 2                                        | 3                                     | 4        | 5              |
| ...war mein Alltag voller Dinge, die mich interessieren      | 0                      | 1         | 2                                        | 3                                     | 4        | 5              |

# 18. Tag: \_\_\_\_\_

Ketonkörper (mg/dl):  0  5  15  40  80  160

**Diät:**  800 kcal  1.200 kcal  1.800 kcal

Zusätze:  nein  Fisch

andere: \_\_\_\_\_

**Entlastungstag:**  Reis  Kartoffel/Gemüse

Früchte  andere: \_\_\_\_\_

**Fasten:** Honig  nein  ja

mittags: Saft (¼ l)  nein  ja

Gemüsebrühe (¼ l)  nein  ja

abends: Gemüsebrühe (¼ l)  nein  ja

Zusätze:  nein  Kousmine  Kousmine vegan

Joghurt  Haferschleim

Reisschleim  Karottensaft

grüner Tee  schwarzer Tee

andere: \_\_\_\_\_

**Fastenbrechen**

**Aufbautag:**  1  2  3  4

## Körperliches Befinden:

sehr schlecht

|   |   |   |   |   |   |   |   |   |   |    |
|---|---|---|---|---|---|---|---|---|---|----|
| 0 | 1 | 2 | 3 | 4 | 5 | 6 | 7 | 8 | 9 | 10 |
|---|---|---|---|---|---|---|---|---|---|----|

hervorragend

## Psychisch-seelisches Befinden:

sehr schlecht

|   |   |   |   |   |   |   |   |   |   |    |
|---|---|---|---|---|---|---|---|---|---|----|
| 0 | 1 | 2 | 3 | 4 | 5 | 6 | 7 | 8 | 9 | 10 |
|---|---|---|---|---|---|---|---|---|---|----|

hervorragend

**In der Klinik neu aufgetretene Beschwerden:**  nein  ja

- |                                               |                                          |
|-----------------------------------------------|------------------------------------------|
| <input type="checkbox"/> Kopfschmerzen        | <input type="checkbox"/> Muskelschmerzen |
| <input type="checkbox"/> Schlafstörungen      | <input type="checkbox"/> Sodbrennen      |
| <input type="checkbox"/> Mundgeruch           | <input type="checkbox"/> Übelkeit        |
| (fragen Sie die Schwester)                    | <input type="checkbox"/> Trockener Mund  |
| <input type="checkbox"/> Müdigkeit            | <input type="checkbox"/> Wadenkrämpfe    |
| <input type="checkbox"/> Rückenschmerzen      | <input type="checkbox"/> Durchfall       |
| <input type="checkbox"/> Kälteempfindlichkeit | <input type="checkbox"/> Unruhige Beine  |
| <input type="checkbox"/> Schwindel            | <input type="checkbox"/> Obstipation     |
| <input type="checkbox"/> Hunger               | <input type="checkbox"/> Herzklopfen     |
| <input type="checkbox"/> Hautausschlag        | <input type="checkbox"/> Sehstörungen    |
| <input type="checkbox"/> Blähungen            | <input type="checkbox"/> Essdrang        |
| <input type="checkbox"/> sonstige: _____      |                                          |

**Am heutigen Tag...**

|                                                                  | zu keinem<br>Zeitpunkt | ab und zu | etwas weniger als<br>die Hälfte der Zeit | etwas mehr als<br>die Hälfte der Zeit | meistens | die ganze Zeit |
|------------------------------------------------------------------|------------------------|-----------|------------------------------------------|---------------------------------------|----------|----------------|
| ... war ich froh und guter Laune                                 | 0                      | 1         | 2                                        | 3                                     | 4        | 5              |
| ... habe ich mich ruhig und<br>entspannt gefühlt                 | 0                      | 1         | 2                                        | 3                                     | 4        | 5              |
| ... habe ich mich energisch und<br>aktiv gefühlt                 | 0                      | 1         | 2                                        | 3                                     | 4        | 5              |
| ... habe ich mich beim Aufwachen<br>frisch und ausgeruht gefühlt | 0                      | 1         | 2                                        | 3                                     | 4        | 5              |
| ... war mein Alltag voller Dinge,<br>die mich interessieren      | 0                      | 1         | 2                                        | 3                                     | 4        | 5              |

## 19. Tag: \_\_\_\_\_

Ketonkörper (mg/dl):  0  5  15  40  80  160

**Diät:**  800 kcal  1.200 kcal  1.800 kcal

Zusätze:  nein  Fisch

andere: \_\_\_\_\_

**Entlastungstag:**  Reis  Kartoffel/Gemüse

Früchte  andere: \_\_\_\_\_

**Fasten:** Honig  nein  ja

mittags: Saft (¼ l)  nein  ja

Gemüsebrühe (¼ l)  nein  ja

abends: Gemüsebrühe (¼ l)  nein  ja

Zusätze:  nein  Kousmine  Kousmine vegan

Joghurt  Haferschleim

Reisschleim  Karottensaft

grüner Tee  schwarzer Tee

andere: \_\_\_\_\_

**Fastenbrechen**

**Aufbautag:**  1  2  3  4

### Körperliches Befinden:

sehr schlecht

|   |   |   |   |   |   |   |   |   |   |    |
|---|---|---|---|---|---|---|---|---|---|----|
| 0 | 1 | 2 | 3 | 4 | 5 | 6 | 7 | 8 | 9 | 10 |
|---|---|---|---|---|---|---|---|---|---|----|

hervorragend

### Psychisch-seelisches Befinden:

sehr schlecht

|   |   |   |   |   |   |   |   |   |   |    |
|---|---|---|---|---|---|---|---|---|---|----|
| 0 | 1 | 2 | 3 | 4 | 5 | 6 | 7 | 8 | 9 | 10 |
|---|---|---|---|---|---|---|---|---|---|----|

hervorragend

**In der Klinik neu aufgetretene Beschwerden:**  nein  ja

- |                                                                   |                                          |
|-------------------------------------------------------------------|------------------------------------------|
| <input type="checkbox"/> Kopfschmerzen                            | <input type="checkbox"/> Muskelschmerzen |
| <input type="checkbox"/> Schlafstörungen                          | <input type="checkbox"/> Sodbrennen      |
| <input type="checkbox"/> Mundgeruch<br>(fragen Sie die Schwester) | <input type="checkbox"/> Übelkeit        |
| <input type="checkbox"/> Müdigkeit                                | <input type="checkbox"/> Trockener Mund  |
| <input type="checkbox"/> Rückenschmerzen                          | <input type="checkbox"/> Wadenkrämpfe    |
| <input type="checkbox"/> Kälteempfindlichkeit                     | <input type="checkbox"/> Durchfall       |
| <input type="checkbox"/> Schwindel                                | <input type="checkbox"/> Unruhige Beine  |
| <input type="checkbox"/> Hunger                                   | <input type="checkbox"/> Obstipation     |
| <input type="checkbox"/> Hautausschlag                            | <input type="checkbox"/> Herzklopfen     |
| <input type="checkbox"/> Blähungen                                | <input type="checkbox"/> Sehstörungen    |
| <input type="checkbox"/> sonstige: _____                          | <input type="checkbox"/> Essdrang        |

**Am heutigen Tag...**

|                                                                 | zu keinem<br>Zeitpunkt | ab und zu | etwas weniger als<br>die Hälfte der Zeit | etwas mehr als<br>die Hälfte der Zeit | meistens | die ganze Zeit |
|-----------------------------------------------------------------|------------------------|-----------|------------------------------------------|---------------------------------------|----------|----------------|
| ...war ich froh und guter Laune                                 | 0                      | 1         | 2                                        | 3                                     | 4        | 5              |
| ...habe ich mich ruhig und<br>entspannt gefühlt                 | 0                      | 1         | 2                                        | 3                                     | 4        | 5              |
| ...habe ich mich energisch und<br>aktiv gefühlt                 | 0                      | 1         | 2                                        | 3                                     | 4        | 5              |
| ...habe ich mich beim Aufwachen<br>frisch und ausgeruht gefühlt | 0                      | 1         | 2                                        | 3                                     | 4        | 5              |
| ...war mein Alltag voller Dinge,<br>die mich interessieren      | 0                      | 1         | 2                                        | 3                                     | 4        | 5              |

## 20. Tag: \_\_\_\_\_

Ketonkörper (mg/dl):  0  5  15  40  80  160

**Diät:**  800 kcal  1.200 kcal  1.800 kcal

Zusätze:  nein  Fisch

andere: \_\_\_\_\_

**Entlastungstag:**  Reis  Kartoffel/Gemüse

Früchte  andere: \_\_\_\_\_

**Fasten:** Honig  nein  ja

mittags: Saft (¼ l)  nein  ja

Gemüsebrühe (¼ l)  nein  ja

abends: Gemüsebrühe (¼ l)  nein  ja

Zusätze:  nein  Kousmine  Kousmine vegan

Joghurt  Haferschleim

Reisschleim  Karottensaft

grüner Tee  schwarzer Tee

andere: \_\_\_\_\_

**Fastenbrechen**

**Aufbautag:**  1  2  3  4

### Körperliches Befinden:

sehr schlecht

|   |   |   |   |   |   |   |   |   |   |    |
|---|---|---|---|---|---|---|---|---|---|----|
| 0 | 1 | 2 | 3 | 4 | 5 | 6 | 7 | 8 | 9 | 10 |
|---|---|---|---|---|---|---|---|---|---|----|

hervorragend

### Psychisch-seelisches Befinden:

sehr schlecht

|   |   |   |   |   |   |   |   |   |   |    |
|---|---|---|---|---|---|---|---|---|---|----|
| 0 | 1 | 2 | 3 | 4 | 5 | 6 | 7 | 8 | 9 | 10 |
|---|---|---|---|---|---|---|---|---|---|----|

hervorragend

**In der Klinik neu aufgetretene Beschwerden:**  nein  ja

- |                                                                   |                                          |
|-------------------------------------------------------------------|------------------------------------------|
| <input type="checkbox"/> Kopfschmerzen                            | <input type="checkbox"/> Muskelschmerzen |
| <input type="checkbox"/> Schlafstörungen                          | <input type="checkbox"/> Sodbrennen      |
| <input type="checkbox"/> Mundgeruch<br>(fragen Sie die Schwester) | <input type="checkbox"/> Übelkeit        |
| <input type="checkbox"/> Müdigkeit                                | <input type="checkbox"/> Trockener Mund  |
| <input type="checkbox"/> Rückenschmerzen                          | <input type="checkbox"/> Wadenkrämpfe    |
| <input type="checkbox"/> Kälteempfindlichkeit                     | <input type="checkbox"/> Durchfall       |
| <input type="checkbox"/> Schwindel                                | <input type="checkbox"/> Unruhige Beine  |
| <input type="checkbox"/> Hunger                                   | <input type="checkbox"/> Obstipation     |
| <input type="checkbox"/> Hautausschlag                            | <input type="checkbox"/> Herzklopfen     |
| <input type="checkbox"/> Blähungen                                | <input type="checkbox"/> Sehstörungen    |
| <input type="checkbox"/> sonstige: _____                          | <input type="checkbox"/> Essdrang        |

**Am heutigen Tag...**

|                                                              | zu keinem<br>Zeitpunkt | ab und zu | etwas weniger als<br>die Hälfte der Zeit | etwas mehr als<br>die Hälfte der Zeit | meistens | die ganze Zeit |
|--------------------------------------------------------------|------------------------|-----------|------------------------------------------|---------------------------------------|----------|----------------|
| ...war ich froh und guter Laune                              | 0                      | 1         | 2                                        | 3                                     | 4        | 5              |
| ...habe ich mich ruhig und entspannt gefühlt                 | 0                      | 1         | 2                                        | 3                                     | 4        | 5              |
| ...habe ich mich energisch und aktiv gefühlt                 | 0                      | 1         | 2                                        | 3                                     | 4        | 5              |
| ...habe ich mich beim Aufwachen frisch und ausgeruht gefühlt | 0                      | 1         | 2                                        | 3                                     | 4        | 5              |
| ...war mein Alltag voller Dinge, die mich interessieren      | 0                      | 1         | 2                                        | 3                                     | 4        | 5              |

## 21. Tag: \_\_\_\_\_

Ketonkörper (mg/dl):  0  5  15  40  80  160

**Diät:**  800 kcal  1.200 kcal  1.800 kcal

Zusätze:  nein  Fisch

andere: \_\_\_\_\_

**Entlastungstag:**  Reis  Kartoffel/Gemüse

Früchte  andere: \_\_\_\_\_

**Fasten:** Honig  nein  ja

mittags: Saft (¼ l)  nein  ja

Gemüsebrühe (¼ l)  nein  ja

abends: Gemüsebrühe (¼ l)  nein  ja

Zusätze:  nein  Kousmine  Kousmine vegan

Joghurt  Haferschleim

Reisschleim  Karottensaft

grüner Tee  schwarzer Tee

andere: \_\_\_\_\_

**Fastenbrechen**

**Aufbautag:**  1  2  3  4

### Körperliches Befinden:

sehr schlecht

|   |   |   |   |   |   |   |   |   |   |    |
|---|---|---|---|---|---|---|---|---|---|----|
| 0 | 1 | 2 | 3 | 4 | 5 | 6 | 7 | 8 | 9 | 10 |
|---|---|---|---|---|---|---|---|---|---|----|

hervorragend

### Psychisch-seelisches Befinden:

sehr schlecht

|   |   |   |   |   |   |   |   |   |   |    |
|---|---|---|---|---|---|---|---|---|---|----|
| 0 | 1 | 2 | 3 | 4 | 5 | 6 | 7 | 8 | 9 | 10 |
|---|---|---|---|---|---|---|---|---|---|----|

hervorragend



**In der Klinik neu aufgetretene Beschwerden:**  nein  ja

- |                                                                   |                                          |
|-------------------------------------------------------------------|------------------------------------------|
| <input type="checkbox"/> Kopfschmerzen                            | <input type="checkbox"/> Muskelschmerzen |
| <input type="checkbox"/> Schlafstörungen                          | <input type="checkbox"/> Sodbrennen      |
| <input type="checkbox"/> Mundgeruch<br>(fragen Sie die Schwester) | <input type="checkbox"/> Übelkeit        |
| <input type="checkbox"/> Müdigkeit                                | <input type="checkbox"/> Trockener Mund  |
| <input type="checkbox"/> Rückenschmerzen                          | <input type="checkbox"/> Wadenkrämpfe    |
| <input type="checkbox"/> Kälteempfindlichkeit                     | <input type="checkbox"/> Durchfall       |
| <input type="checkbox"/> Schwindel                                | <input type="checkbox"/> Unruhige Beine  |
| <input type="checkbox"/> Hunger                                   | <input type="checkbox"/> Obstipation     |
| <input type="checkbox"/> Hautausschlag                            | <input type="checkbox"/> Herzklopfen     |
| <input type="checkbox"/> Blähungen                                | <input type="checkbox"/> Sehstörungen    |
| <input type="checkbox"/> sonstige: _____                          | <input type="checkbox"/> Essdrang        |

**Am heutigen Tag...**

|                                                              | zu keinem<br>Zeitpunkt | ab und zu | etwas weniger als<br>die Hälfte der Zeit | etwas mehr als<br>die Hälfte der Zeit | meistens | die ganze Zeit |
|--------------------------------------------------------------|------------------------|-----------|------------------------------------------|---------------------------------------|----------|----------------|
| ...war ich froh und guter Laune                              | 0                      | 1         | 2                                        | 3                                     | 4        | 5              |
| ...habe ich mich ruhig und entspannt gefühlt                 | 0                      | 1         | 2                                        | 3                                     | 4        | 5              |
| ...habe ich mich energisch und aktiv gefühlt                 | 0                      | 1         | 2                                        | 3                                     | 4        | 5              |
| ...habe ich mich beim Aufwachen frisch und ausgeruht gefühlt | 0                      | 1         | 2                                        | 3                                     | 4        | 5              |
| ...war mein Alltag voller Dinge, die mich interessieren      | 0                      | 1         | 2                                        | 3                                     | 4        | 5              |

## 22. Tag: \_\_\_\_\_

Ketonkörper (mg/dl):  0  5  15  40  80  160

**Diät:**  800 kcal  1.200 kcal  1.800 kcal

Zusätze:  nein  Fisch

andere: \_\_\_\_\_

**Entlastungstag:**  Reis  Kartoffel/Gemüse

Früchte  andere: \_\_\_\_\_

**Fasten:** Honig  nein  ja

mittags: Saft (¼ l)  nein  ja

Gemüsebrühe (¼ l)  nein  ja

abends: Gemüsebrühe (¼ l)  nein  ja

Zusätze:  nein  Kousmine  Kousmine vegan

Joghurt  Haferschleim

Reisschleim  Karottensaft

grüner Tee  schwarzer Tee

andere: \_\_\_\_\_

**Fastenbrechen**

**Aufbautag:**  1  2  3  4

### Körperliches Befinden:

sehr schlecht

|   |   |   |   |   |   |   |   |   |   |    |
|---|---|---|---|---|---|---|---|---|---|----|
| 0 | 1 | 2 | 3 | 4 | 5 | 6 | 7 | 8 | 9 | 10 |
|---|---|---|---|---|---|---|---|---|---|----|

hervorragend

### Psychisch-seelisches Befinden:

sehr schlecht

|   |   |   |   |   |   |   |   |   |   |    |
|---|---|---|---|---|---|---|---|---|---|----|
| 0 | 1 | 2 | 3 | 4 | 5 | 6 | 7 | 8 | 9 | 10 |
|---|---|---|---|---|---|---|---|---|---|----|

hervorragend

**In der Klinik neu aufgetretene Beschwerden:**  nein  ja

- |                                                                   |                                          |
|-------------------------------------------------------------------|------------------------------------------|
| <input type="checkbox"/> Kopfschmerzen                            | <input type="checkbox"/> Muskelschmerzen |
| <input type="checkbox"/> Schlafstörungen                          | <input type="checkbox"/> Sodbrennen      |
| <input type="checkbox"/> Mundgeruch<br>(fragen Sie die Schwester) | <input type="checkbox"/> Übelkeit        |
| <input type="checkbox"/> Müdigkeit                                | <input type="checkbox"/> Trockener Mund  |
| <input type="checkbox"/> Rückenschmerzen                          | <input type="checkbox"/> Wadenkrämpfe    |
| <input type="checkbox"/> Kälteempfindlichkeit                     | <input type="checkbox"/> Durchfall       |
| <input type="checkbox"/> Schwindel                                | <input type="checkbox"/> Unruhige Beine  |
| <input type="checkbox"/> Hunger                                   | <input type="checkbox"/> Obstipation     |
| <input type="checkbox"/> Hautausschlag                            | <input type="checkbox"/> Herzklopfen     |
| <input type="checkbox"/> Blähungen                                | <input type="checkbox"/> Sehstörungen    |
| <input type="checkbox"/> sonstige: _____                          | <input type="checkbox"/> Essdrang        |

**Am heutigen Tag...**

|                                                              | zu keinem<br>Zeitpunkt | ab und zu | etwas weniger als<br>die Hälfte der Zeit | etwas mehr als<br>die Hälfte der Zeit | meistens | die ganze Zeit |
|--------------------------------------------------------------|------------------------|-----------|------------------------------------------|---------------------------------------|----------|----------------|
| ...war ich froh und guter Laune                              | 0                      | 1         | 2                                        | 3                                     | 4        | 5              |
| ...habe ich mich ruhig und entspannt gefühlt                 | 0                      | 1         | 2                                        | 3                                     | 4        | 5              |
| ...habe ich mich energisch und aktiv gefühlt                 | 0                      | 1         | 2                                        | 3                                     | 4        | 5              |
| ...habe ich mich beim Aufwachen frisch und ausgeruht gefühlt | 0                      | 1         | 2                                        | 3                                     | 4        | 5              |
| ...war mein Alltag voller Dinge, die mich interessieren      | 0                      | 1         | 2                                        | 3                                     | 4        | 5              |

## Fragen am Ende des Aufenthalts

- 1) Hatten Sie zu Beginn des Aufenthalts eine gesundheitliche Hauptbeschwerde?

nein

ja, welche? \_\_\_\_\_

---

Wie hat sich diese seit Aufenthaltsbeginn zu heute verändert?

sehr viel schlechter 

|   |   |   |   |   |   |   |
|---|---|---|---|---|---|---|
| 1 | 2 | 3 | 4 | 5 | 6 | 7 |
|---|---|---|---|---|---|---|

 sehr viel besser

- 2) Sie haben sich während des Aufenthalts einer Fastentherapie bzw. einer Diät unterzogen.

Wie würden Sie diese bewerten?

es war fast nicht durchzuhalten 

|   |   |   |   |   |   |   |
|---|---|---|---|---|---|---|
| 1 | 2 | 3 | 4 | 5 | 6 | 7 |
|---|---|---|---|---|---|---|

 ein großartiges Erlebnis

- 3) Wenn Sie Ihren Aufenthalt bei Buchinger Wilhelmi mit einer üblichen Urlaubsreise oder einem anderen Erholungsurlaub vergleichen, war dieser:

weniger erholsam

gleich erholsam

stärker erholsam

- 4) Die Länge Ihres Aufenthalts empfanden Sie als:

zu kurz

genau richtig

zu lang

- 5) Falls Sie gefastet haben, hätten Sie am letzten Fastentag gerne länger gefastet?

nein

ja

# Lebensstil – während des Aufenthalts

## Stress-/Entspannungsniveau:

bedrohliche  
Anspannung

|   |   |   |   |   |   |   |   |   |   |    |
|---|---|---|---|---|---|---|---|---|---|----|
| 0 | 1 | 2 | 3 | 4 | 5 | 6 | 7 | 8 | 9 | 10 |
|---|---|---|---|---|---|---|---|---|---|----|

total  
entspannt

**Nikotin:**  nein  Zigaretten/Tag: 

|  |  |
|--|--|
|  |  |
|--|--|

nein  Zigarren/Tag: 

|  |  |
|--|--|
|  |  |
|--|--|

**Alkohol:**  nein  Bier: Gläser (0,5 l)/Woche: 

|  |  |
|--|--|
|  |  |
|--|--|

nein  Wein: Gläser (0,25 l)/Woche: 

|  |  |
|--|--|
|  |  |
|--|--|

nein  Schnaps: Gläser (2 cl)/Woche: 

|  |  |
|--|--|
|  |  |
|--|--|

**Kaffee:**  nein  Tassen/Tag: 

|  |  |
|--|--|
|  |  |
|--|--|

**Medien:**  nein  Smartphone (h/Woche): 

|  |  |
|--|--|
|  |  |
|--|--|

nein  TV (h/Woche): 

|  |  |
|--|--|
|  |  |
|--|--|

nein  PC (h/Woche): 

|  |  |
|--|--|
|  |  |
|--|--|

**Sport/**  nein  ja: h/Woche: 

|  |  |
|--|--|
|  |  |
|--|--|

, 

|  |
|--|
|  |
|--|

## Bewegung:

In den letzten  
Wochen...

|                                                                 | zu keinem<br>Zeitpunkt | ab und zu | etwas weniger als<br>die Hälfte der Zeit | etwas mehr als<br>die Hälfte der Zeit | meistens | die ganze Zeit |
|-----------------------------------------------------------------|------------------------|-----------|------------------------------------------|---------------------------------------|----------|----------------|
| ...war ich froh und guter Laune                                 | 0                      | 1         | 2                                        | 3                                     | 4        | 5              |
| ...habe ich mich ruhig und<br>entspannt gefühlt                 | 0                      | 1         | 2                                        | 3                                     | 4        | 5              |
| ...habe ich mich energisch und<br>aktiv gefühlt                 | 0                      | 1         | 2                                        | 3                                     | 4        | 5              |
| ...habe ich mich beim Aufwachen<br>frisch und ausgeruht gefühlt | 0                      | 1         | 2                                        | 3                                     | 4        | 5              |
| ...war mein Alltag voller Dinge,<br>die mich interessieren      | 0                      | 1         | 2                                        | 3                                     | 4        | 5              |



BITTE GEBEN SIE  
DIESES AUSGEFÜLLTE  
TAGEBUCH AM  
ABREISETAG AN IHRE  
STATIONSSCHWESTER  
ZURÜCK!

VIELEN DANK!

**Die Beantwortung der folgenden Fragen ist für die wissenschaftliche Dokumentation nicht erforderlich, hilft jedoch der Klinik Buchinger Wilhelmi ihr Angebot immer besser zu gestalten:**

Wie empfanden Sie das Ausfüllen dieses Heftchens?

Hätten Sie Verbesserungsvorschläge?

Hat der Aufenthalt Ihre Erwartungen erfüllt?

Welchen Einfluss, glauben Sie, wird der Aufenthalt auf Ihr Leben haben?

Brauchen Sie die Unterstützung einer Ernährungsberaterin im Alltag? Hier unser Skype-Angebot: „Feel well after Buchinger Wilhelmi“

E-Mail: [nutrition@buchinger-wilhelmi.com](mailto:nutrition@buchinger-wilhelmi.com)

Vielen Dank und auf Wiedersehen!

Wir freuen uns, Sie in zwei Wochen, drei und elf Monaten anzuschreiben, um zu erfahren wie es Ihnen geht.

Gute Heimfahrt!

Follow up Buchinger Wilhelmi
