# Supplementary material for: Safety, health improvement and well-being during a 4 to 21-day fasting period in an observational study including 1422 subjects
Source: PubMed Central journal article supplement (PMC6314618; doi:10.1371/journal.pone.0209353), 2019-01-02
Supplement: pone.0209353.s022.pdf [file pone.0209353.s022.pdf]

# S5 Text. Questionnaires in English.

Self-observation

diary

Name: \_\_\_\_\_

Room number: \_\_\_\_\_

Stay from: \_\_\_\_\_ to: \_\_\_\_\_

Dear patients,  
dear guests

The changes in metabolism caused by fasting or nutritional therapy could affect the personal well-being. By using this diary the effects could be recorded and thus become more comprehensible. In addition it could help to optimize prospective therapy recommendations.

Only a complete documentation enables us to detect coherences. Therefore, we kindly ask you to complete this diary as accurately as possible.

In addition we request you to fill in information about:

1. your lifestyle before the stay (page 7)
2. your lifestyle during the stay (page 53)
3. questions at the end of your stay (page 52)

Please give the completed diary back to your nurse on the day of departure.

Thank you for your participation!

Dr Françoise Wilhelmi de Toledo and  
the scientific team of the clinic Buchinger Wilhelmi

## Instruction:

➤ Date:

First enter the date, please. Day 1 is equivalent to the day of arrival.

➤ Diet:

Please mark your accurate diet with a cross day by day and complete the belonging information. In case of not-appropriate statements please check the No-box.

➤ Ketone bodies:

Measure the ketone bodies daily in the first morning urine and indicate the result in the respective field. Only one value can be indicated.

➤ Physical and emotional well-being:

Evaluate your physical and emotional well-being on a scale reaching from 0 to 10. Please determine one value.

➤ Symptoms:

If you don't have any symptoms please tick no. If symptoms occurred please check the Yes-box and choose one or more symptoms that you have observed.

➤ Your today's well-being:

Evaluate your well-being by choosing one value between 0 and 5 for each statement.

Example: monday, 18.01.16

ketone bodies (mg/dl):  0  5  15  40  80  160

diet:  800 kcal  1.200 kcal  1.800 kcal

supplements:  none  fish

others: \_\_\_\_\_

digestive rest day:  rice  potato/vegetables

fruit  others: \_\_\_\_\_

fasting: honey  no  yes

noon: juice (¼ l)  no  yes

vegetable soup (¼ l)  no  yes

evening: vegetable soup (¼ l)  no  yes

supplements:  none  Kousmine  Kousmine vegan

yoghurt  oatmeal soup

rice soup  carrot juice

green tea  black tea

others: \_\_\_\_\_

day of breaking the fast

building up day:  1  2  3  4

physical well-being:

very bad

0 1  2 3 4 5 6 7 8 9 10

excellent

emotional well-being:

very bad

0 1 2 3 4 5 6 7  8 9 10

excellent

**symptoms that occurred in the clinic:**     no     yes

- |                                                        |                                            |
|--------------------------------------------------------|--------------------------------------------|
| <input type="checkbox"/> headache                      | <input type="checkbox"/> muscle pains      |
| <input type="checkbox"/> sleep disturbances            | <input type="checkbox"/> heartburn         |
| <input type="checkbox"/> bad breath<br>(ask the nurse) | <input type="checkbox"/> nausea            |
| <input type="checkbox"/> tiredness                     | <input type="checkbox"/> dry mouth         |
| <input type="checkbox"/> back pain                     | <input type="checkbox"/> cramp in the calf |
| <input type="checkbox"/> sensitivity to cold           | <input type="checkbox"/> diarrhea          |
| <input type="checkbox"/> vertigo                       | <input type="checkbox"/> restless legs     |
| <input type="checkbox"/> hunger                        | <input type="checkbox"/> obstipation       |
| <input type="checkbox"/> skin rash                     | <input type="checkbox"/> palpitations      |
| <input type="checkbox"/> abdominal bloating            | <input type="checkbox"/> blurred vision    |
| <input type="checkbox"/> others: _____                 | <input type="checkbox"/> cravings          |

**Today...**

|                                                               | At no time   | Some of the time | Less than half of the time | More than half of the time | Most of the time | All of the time |
|---------------------------------------------------------------|--------------|------------------|----------------------------|----------------------------|------------------|-----------------|
| ...I have felt cheerful and in good spirits                   | 0            | 1                | 2                          | 3                          | <del>4</del>     | 5               |
| ...I have felt calm and relaxed                               | 0            | 1                | <del>2</del>               | 3                          | 4                | 5               |
| ...I have felt active and vigorous                            | 0            | 1                | 2                          | <del>3</del>               | 4                | 5               |
| ...I woke up feeling fresh and rested                         | <del>0</del> | 1                | 2                          | 3                          | 4                | 5               |
| ...my daily life has been filled with things that interest me | 0            | 1                | 2                          | 3                          | <del>4</del>     | 5               |

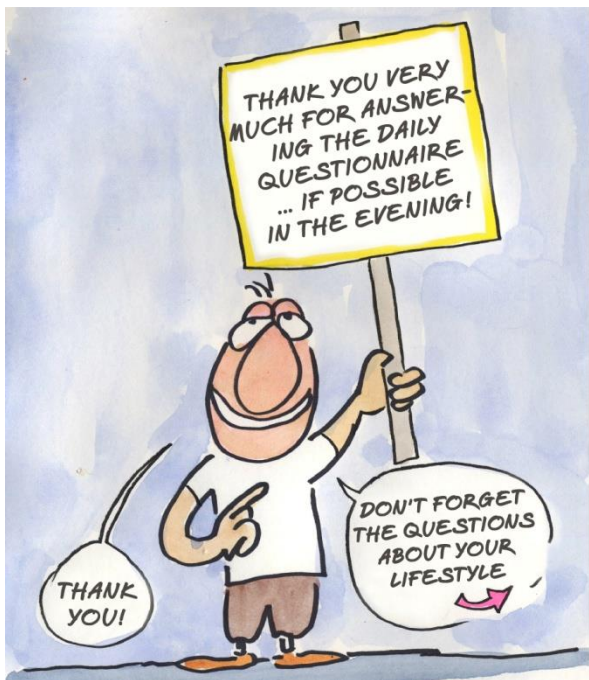

# Lifestyle – before the stay

stress/relaxation level:

extreme  
tension

|   |   |   |   |   |   |   |   |   |   |    |
|---|---|---|---|---|---|---|---|---|---|----|
| 0 | 1 | 2 | 3 | 4 | 5 | 6 | 7 | 8 | 9 | 10 |
|---|---|---|---|---|---|---|---|---|---|----|

total  
relaxation

**nicotine:**  none  cigarettes/day:

none  cigars/day:

**alcohol:**  none  beer: glasses (0,5 l)/week:

none  wine: glasses (0,25 l)/week:

none  spirits: glasses (2 cl)/week:

**coffee:**  none  cups/day:

**media:**  none  Smartphone (h/week):

none  TV (h/week):

none  PC (h/week):

**exercise:**  none  yes: h/week:   ,

**Over the last two weeks  
before coming to  
Buchinger Wilhelmi...**

|                                                               | At no time | Some of the time | Less than half of the time | More than half of the time | Most of the time | All of the time |
|---------------------------------------------------------------|------------|------------------|----------------------------|----------------------------|------------------|-----------------|
| ...I have felt cheerful and in good spirits                   | 0          | 1                | 2                          | 3                          | 4                | 5               |
| ...I have felt calm and relaxed                               | 0          | 1                | 2                          | 3                          | 4                | 5               |
| ...I have felt active and vigorous                            | 0          | 1                | 2                          | 3                          | 4                | 5               |
| ...I woke up feeling fresh and rested                         | 0          | 1                | 2                          | 3                          | 4                | 5               |
| ...my daily life has been filled with things that interest me | 0          | 1                | 2                          | 3                          | 4                | 5               |

**Day 1 (arrival):** \_\_\_\_\_

**ketone bodies (mg/dl):**  0  5  15  40  80  160

- diet:**  800 kcal  1.200 kcal  1.800 kcal  
supplements:  none  fish  
 others: \_\_\_\_\_
- digestive rest day:**  rice  potato/vegetables  
 fruit  others: \_\_\_\_\_
- fasting:** honey  no  yes  
noon: juice (¼ l)  no  yes  
vegetable soup (¼ l)  no  yes  
evening: vegetable soup (¼ l)  no  yes  
supplements:  none  Kousmine  Kousmine vegan  
 yoghurt  oatmeal soup  
 rice soup  carrot juice  
 green tea  black tea  
 others: \_\_\_\_\_
- day of breaking the fast**
- building up day:**  1  2  3  4

**physical well-being:**

very bad

|   |   |   |   |   |   |   |   |   |   |    |
|---|---|---|---|---|---|---|---|---|---|----|
| 0 | 1 | 2 | 3 | 4 | 5 | 6 | 7 | 8 | 9 | 10 |
|---|---|---|---|---|---|---|---|---|---|----|

excellent

**emotional well-being:**

very bad

|   |   |   |   |   |   |   |   |   |   |    |
|---|---|---|---|---|---|---|---|---|---|----|
| 0 | 1 | 2 | 3 | 4 | 5 | 6 | 7 | 8 | 9 | 10 |
|---|---|---|---|---|---|---|---|---|---|----|

excellent



**symptoms that occurred in the clinic:**       no       yes

- |                                                        |                                            |
|--------------------------------------------------------|--------------------------------------------|
| <input type="checkbox"/> headache                      | <input type="checkbox"/> muscle pains      |
| <input type="checkbox"/> sleep disturbances            | <input type="checkbox"/> heartburn         |
| <input type="checkbox"/> bad breath<br>(ask the nurse) | <input type="checkbox"/> nausea            |
| <input type="checkbox"/> tiredness                     | <input type="checkbox"/> dry mouth         |
| <input type="checkbox"/> back pain                     | <input type="checkbox"/> cramp in the calf |
| <input type="checkbox"/> sensitivity to cold           | <input type="checkbox"/> diarrhea          |
| <input type="checkbox"/> vertigo                       | <input type="checkbox"/> restless legs     |
| <input type="checkbox"/> hunger                        | <input type="checkbox"/> obstipation       |
| <input type="checkbox"/> skin rash                     | <input type="checkbox"/> palpitations      |
| <input type="checkbox"/> abdominal bloating            | <input type="checkbox"/> blurred vision    |
| <input type="checkbox"/> others: _____                 | <input type="checkbox"/> cravings          |

| <b>Today...</b>                                               | At no time | Some of the time | Less than half of the time | More than half of the time | Most of the time | All of the time |
|---------------------------------------------------------------|------------|------------------|----------------------------|----------------------------|------------------|-----------------|
| ...I have felt cheerful and in good spirits                   | 0          | 1                | 2                          | 3                          | 4                | 5               |
| ...I have felt calm and relaxed                               | 0          | 1                | 2                          | 3                          | 4                | 5               |
| ...I have felt active and vigorous                            | 0          | 1                | 2                          | 3                          | 4                | 5               |
| ...I woke up feeling fresh and rested                         | 0          | 1                | 2                          | 3                          | 4                | 5               |
| ...my daily life has been filled with things that interest me | 0          | 1                | 2                          | 3                          | 4                | 5               |

## Day 2: \_\_\_\_\_

**ketone bodies** (mg/dl):  0  5  15  40  80  160

- diet:**  800 kcal  1.200 kcal  1.800 kcal  
supplements:  none  fish  
 others: \_\_\_\_\_
- digestive rest day:**  rice  potato/vegetables  
 fruit  others: \_\_\_\_\_
- fasting:** honey  no  yes  
noon: juice (¼ l)  no  yes  
vegetable soup (¼ l)  no  yes  
evening: vegetable soup (¼ l)  no  yes  
supplements:  none  Kousmine  Kousmine vegan  
 yoghurt  oatmeal soup  
 rice soup  carrot juice  
 green tea  black tea  
 others: \_\_\_\_\_
- day of breaking the fast**
- building up day:**  1  2  3  4

### physical well-being:

very bad

|   |   |   |   |   |   |   |   |   |   |    |
|---|---|---|---|---|---|---|---|---|---|----|
| 0 | 1 | 2 | 3 | 4 | 5 | 6 | 7 | 8 | 9 | 10 |
|---|---|---|---|---|---|---|---|---|---|----|

excellent

### emotional well-being:

very bad

|   |   |   |   |   |   |   |   |   |   |    |
|---|---|---|---|---|---|---|---|---|---|----|
| 0 | 1 | 2 | 3 | 4 | 5 | 6 | 7 | 8 | 9 | 10 |
|---|---|---|---|---|---|---|---|---|---|----|

excellent

**symptoms that occurred in the clinic:**       no       yes

- |                                                        |                                            |
|--------------------------------------------------------|--------------------------------------------|
| <input type="checkbox"/> headache                      | <input type="checkbox"/> muscle pains      |
| <input type="checkbox"/> sleep disturbances            | <input type="checkbox"/> heartburn         |
| <input type="checkbox"/> bad breath<br>(ask the nurse) | <input type="checkbox"/> nausea            |
| <input type="checkbox"/> tiredness                     | <input type="checkbox"/> dry mouth         |
| <input type="checkbox"/> back pain                     | <input type="checkbox"/> cramp in the calf |
| <input type="checkbox"/> sensitivity to cold           | <input type="checkbox"/> diarrhea          |
| <input type="checkbox"/> vertigo                       | <input type="checkbox"/> restless legs     |
| <input type="checkbox"/> hunger                        | <input type="checkbox"/> obstipation       |
| <input type="checkbox"/> skin rash                     | <input type="checkbox"/> palpitations      |
| <input type="checkbox"/> abdominal bloating            | <input type="checkbox"/> blurred vision    |
| <input type="checkbox"/> others: _____                 | <input type="checkbox"/> cravings          |

| <b>Today...</b>                                               | At no time | Some of the time | Less than half of the time | More than half of the time | Most of the time | All of the time |
|---------------------------------------------------------------|------------|------------------|----------------------------|----------------------------|------------------|-----------------|
| ...I have felt cheerful and in good spirits                   | 0          | 1                | 2                          | 3                          | 4                | 5               |
| ...I have felt calm and relaxed                               | 0          | 1                | 2                          | 3                          | 4                | 5               |
| ...I have felt active and vigorous                            | 0          | 1                | 2                          | 3                          | 4                | 5               |
| ...I woke up feeling fresh and rested                         | 0          | 1                | 2                          | 3                          | 4                | 5               |
| ...my daily life has been filled with things that interest me | 0          | 1                | 2                          | 3                          | 4                | 5               |

## Day 3: \_\_\_\_\_

ketone bodies (mg/dl):  0  5  15  40  80  160

- diet:**  800 kcal  1.200 kcal  1.800 kcal  
supplements:  none  fish  
 others: \_\_\_\_\_
- digestive rest day:**  rice  potato/vegetables  
 fruit  others: \_\_\_\_\_
- fasting:** honey  no  yes  
noon: juice (¼ l)  no  yes  
vegetable soup (¼ l)  no  yes  
evening: vegetable soup (¼ l)  no  yes  
supplements:  none  Kousmine  Kousmine vegan  
 yoghurt  oatmeal soup  
 rice soup  carrot juice  
 green tea  black tea  
 others: \_\_\_\_\_
- day of breaking the fast**
- building up day:**  1  2  3  4

### physical well-being:

very bad

|   |   |   |   |   |   |   |   |   |   |    |
|---|---|---|---|---|---|---|---|---|---|----|
| 0 | 1 | 2 | 3 | 4 | 5 | 6 | 7 | 8 | 9 | 10 |
|---|---|---|---|---|---|---|---|---|---|----|

excellent

### emotional well-being:

very bad

|   |   |   |   |   |   |   |   |   |   |    |
|---|---|---|---|---|---|---|---|---|---|----|
| 0 | 1 | 2 | 3 | 4 | 5 | 6 | 7 | 8 | 9 | 10 |
|---|---|---|---|---|---|---|---|---|---|----|

excellent

**symptoms that occurred in the clinic:**       no       yes

- |                                                        |                                            |
|--------------------------------------------------------|--------------------------------------------|
| <input type="checkbox"/> headache                      | <input type="checkbox"/> muscle pains      |
| <input type="checkbox"/> sleep disturbances            | <input type="checkbox"/> heartburn         |
| <input type="checkbox"/> bad breath<br>(ask the nurse) | <input type="checkbox"/> nausea            |
| <input type="checkbox"/> tiredness                     | <input type="checkbox"/> dry mouth         |
| <input type="checkbox"/> back pain                     | <input type="checkbox"/> cramp in the calf |
| <input type="checkbox"/> sensitivity to cold           | <input type="checkbox"/> diarrhea          |
| <input type="checkbox"/> vertigo                       | <input type="checkbox"/> restless legs     |
| <input type="checkbox"/> hunger                        | <input type="checkbox"/> obstipation       |
| <input type="checkbox"/> skin rash                     | <input type="checkbox"/> palpitations      |
| <input type="checkbox"/> abdominal bloating            | <input type="checkbox"/> blurred vision    |
| <input type="checkbox"/> others: _____                 | <input type="checkbox"/> cravings          |

| <b>Today...</b>                                               | At no time | Some of the time | Less than half of the time | More than half of the time | Most of the time | All of the time |
|---------------------------------------------------------------|------------|------------------|----------------------------|----------------------------|------------------|-----------------|
| ...I have felt cheerful and in good spirits                   | 0          | 1                | 2                          | 3                          | 4                | 5               |
| ...I have felt calm and relaxed                               | 0          | 1                | 2                          | 3                          | 4                | 5               |
| ...I have felt active and vigorous                            | 0          | 1                | 2                          | 3                          | 4                | 5               |
| ...I woke up feeling fresh and rested                         | 0          | 1                | 2                          | 3                          | 4                | 5               |
| ...my daily life has been filled with things that interest me | 0          | 1                | 2                          | 3                          | 4                | 5               |

## Day 4: \_\_\_\_\_

ketone bodies (mg/dl):  0  5  15  40  80  160

- diet:**  800 kcal  1.200 kcal  1.800 kcal  
supplements:  none  fish  
 others: \_\_\_\_\_
- digestive rest day:**  rice  potato/vegetables  
 fruit  others: \_\_\_\_\_
- fasting:** honey  no  yes  
noon: juice (¼ l)  no  yes  
vegetable soup (¼ l)  no  yes  
evening: vegetable soup (¼ l)  no  yes  
supplements:  none  Kousmine  Kousmine vegan  
 yoghurt  oatmeal soup  
 rice soup  carrot juice  
 green tea  black tea  
 others: \_\_\_\_\_
- day of breaking the fast**
- building up day:**  1  2  3  4

### physical well-being:

very bad

|   |   |   |   |   |   |   |   |   |   |    |
|---|---|---|---|---|---|---|---|---|---|----|
| 0 | 1 | 2 | 3 | 4 | 5 | 6 | 7 | 8 | 9 | 10 |
|---|---|---|---|---|---|---|---|---|---|----|

excellent

### emotional well-being:

very bad

|   |   |   |   |   |   |   |   |   |   |    |
|---|---|---|---|---|---|---|---|---|---|----|
| 0 | 1 | 2 | 3 | 4 | 5 | 6 | 7 | 8 | 9 | 10 |
|---|---|---|---|---|---|---|---|---|---|----|

excellent

**symptoms that occurred in the clinic:**       no       yes

- |                                                        |                                            |
|--------------------------------------------------------|--------------------------------------------|
| <input type="checkbox"/> headache                      | <input type="checkbox"/> muscle pains      |
| <input type="checkbox"/> sleep disturbances            | <input type="checkbox"/> heartburn         |
| <input type="checkbox"/> bad breath<br>(ask the nurse) | <input type="checkbox"/> nausea            |
| <input type="checkbox"/> tiredness                     | <input type="checkbox"/> dry mouth         |
| <input type="checkbox"/> back pain                     | <input type="checkbox"/> cramp in the calf |
| <input type="checkbox"/> sensitivity to cold           | <input type="checkbox"/> diarrhea          |
| <input type="checkbox"/> vertigo                       | <input type="checkbox"/> restless legs     |
| <input type="checkbox"/> hunger                        | <input type="checkbox"/> obstipation       |
| <input type="checkbox"/> skin rash                     | <input type="checkbox"/> palpitations      |
| <input type="checkbox"/> abdominal bloating            | <input type="checkbox"/> blurred vision    |
| <input type="checkbox"/> others: _____                 | <input type="checkbox"/> cravings          |

**Today...**

|                                                               | At no time | Some of the time | Less than half of the time | More than half of the time | Most of the time | All of the time |
|---------------------------------------------------------------|------------|------------------|----------------------------|----------------------------|------------------|-----------------|
| ...I have felt cheerful and in good spirits                   | 0          | 1                | 2                          | 3                          | 4                | 5               |
| ...I have felt calm and relaxed                               | 0          | 1                | 2                          | 3                          | 4                | 5               |
| ...I have felt active and vigorous                            | 0          | 1                | 2                          | 3                          | 4                | 5               |
| ...I woke up feeling fresh and rested                         | 0          | 1                | 2                          | 3                          | 4                | 5               |
| ...my daily life has been filled with things that interest me | 0          | 1                | 2                          | 3                          | 4                | 5               |

## Day 5: \_\_\_\_\_

ketone bodies (mg/dl):  0  5  15  40  80  160

- diet:**  800 kcal  1.200 kcal  1.800 kcal  
supplements:  none  fish  
 others: \_\_\_\_\_
- digestive rest day:**  rice  potato/vegetables  
 fruit  others: \_\_\_\_\_
- fasting:** honey  no  yes  
noon: juice (¼ l)  no  yes  
vegetable soup (¼ l)  no  yes  
evening: vegetable soup (¼ l)  no  yes  
supplements:  none  Kousmine  Kousmine vegan  
 yoghurt  oatmeal soup  
 rice soup  carrot juice  
 green tea  black tea  
 others: \_\_\_\_\_
- day of breaking the fast**
- building up day:**  1  2  3  4

### physical well-being:

very bad

|   |   |   |   |   |   |   |   |   |   |    |
|---|---|---|---|---|---|---|---|---|---|----|
| 0 | 1 | 2 | 3 | 4 | 5 | 6 | 7 | 8 | 9 | 10 |
|---|---|---|---|---|---|---|---|---|---|----|

excellent

### emotional well-being:

very bad

|   |   |   |   |   |   |   |   |   |   |    |
|---|---|---|---|---|---|---|---|---|---|----|
| 0 | 1 | 2 | 3 | 4 | 5 | 6 | 7 | 8 | 9 | 10 |
|---|---|---|---|---|---|---|---|---|---|----|

excellent



**symptoms that occurred in the clinic:**       no       yes

- |                                                        |                                            |
|--------------------------------------------------------|--------------------------------------------|
| <input type="checkbox"/> headache                      | <input type="checkbox"/> muscle pains      |
| <input type="checkbox"/> sleep disturbances            | <input type="checkbox"/> heartburn         |
| <input type="checkbox"/> bad breath<br>(ask the nurse) | <input type="checkbox"/> nausea            |
| <input type="checkbox"/> tiredness                     | <input type="checkbox"/> dry mouth         |
| <input type="checkbox"/> back pain                     | <input type="checkbox"/> cramp in the calf |
| <input type="checkbox"/> sensitivity to cold           | <input type="checkbox"/> diarrhea          |
| <input type="checkbox"/> vertigo                       | <input type="checkbox"/> restless legs     |
| <input type="checkbox"/> hunger                        | <input type="checkbox"/> obstipation       |
| <input type="checkbox"/> skin rash                     | <input type="checkbox"/> palpitations      |
| <input type="checkbox"/> abdominal bloating            | <input type="checkbox"/> blurred vision    |
| <input type="checkbox"/> others: _____                 | <input type="checkbox"/> cravings          |

| <b>Today...</b>                                               | At no time | Some of the time | Less than half of the time | More than half of the time | Most of the time | All of the time |
|---------------------------------------------------------------|------------|------------------|----------------------------|----------------------------|------------------|-----------------|
| ...I have felt cheerful and in good spirits                   | 0          | 1                | 2                          | 3                          | 4                | 5               |
| ...I have felt calm and relaxed                               | 0          | 1                | 2                          | 3                          | 4                | 5               |
| ...I have felt active and vigorous                            | 0          | 1                | 2                          | 3                          | 4                | 5               |
| ...I woke up feeling fresh and rested                         | 0          | 1                | 2                          | 3                          | 4                | 5               |
| ...my daily life has been filled with things that interest me | 0          | 1                | 2                          | 3                          | 4                | 5               |

## Day 6: \_\_\_\_\_

ketone bodies (mg/dl):  0  5  15  40  80  160

- diet:**  800 kcal  1.200 kcal  1.800 kcal  
supplements:  none  fish  
 others: \_\_\_\_\_
- digestive rest day:**  rice  potato/vegetables  
 fruit  others: \_\_\_\_\_
- fasting:** honey  no  yes  
noon: juice (¼ l)  no  yes  
vegetable soup (¼ l)  no  yes  
evening: vegetable soup (¼ l)  no  yes  
supplements:  none  Kousmine  Kousmine vegan  
 yoghurt  oatmeal soup  
 rice soup  carrot juice  
 green tea  black tea  
 others: \_\_\_\_\_
- day of breaking the fast**
- building up day:**  1  2  3  4

### physical well-being:

very bad

|   |   |   |   |   |   |   |   |   |   |    |
|---|---|---|---|---|---|---|---|---|---|----|
| 0 | 1 | 2 | 3 | 4 | 5 | 6 | 7 | 8 | 9 | 10 |
|---|---|---|---|---|---|---|---|---|---|----|

excellent

### emotional well-being:

very bad

|   |   |   |   |   |   |   |   |   |   |    |
|---|---|---|---|---|---|---|---|---|---|----|
| 0 | 1 | 2 | 3 | 4 | 5 | 6 | 7 | 8 | 9 | 10 |
|---|---|---|---|---|---|---|---|---|---|----|

excellent

**symptoms that occurred in the clinic:**       no       yes

- |                                                        |                                            |
|--------------------------------------------------------|--------------------------------------------|
| <input type="checkbox"/> headache                      | <input type="checkbox"/> muscle pains      |
| <input type="checkbox"/> sleep disturbances            | <input type="checkbox"/> heartburn         |
| <input type="checkbox"/> bad breath<br>(ask the nurse) | <input type="checkbox"/> nausea            |
| <input type="checkbox"/> tiredness                     | <input type="checkbox"/> dry mouth         |
| <input type="checkbox"/> back pain                     | <input type="checkbox"/> cramp in the calf |
| <input type="checkbox"/> sensitivity to cold           | <input type="checkbox"/> diarrhea          |
| <input type="checkbox"/> vertigo                       | <input type="checkbox"/> restless legs     |
| <input type="checkbox"/> hunger                        | <input type="checkbox"/> obstipation       |
| <input type="checkbox"/> skin rash                     | <input type="checkbox"/> palpitations      |
| <input type="checkbox"/> abdominal bloating            | <input type="checkbox"/> blurred vision    |
| <input type="checkbox"/> others: _____                 | <input type="checkbox"/> cravings          |

| <b>Today...</b>                                               | At no time | Some of the time | Less than half of the time | More than half of the time | Most of the time | All of the time |
|---------------------------------------------------------------|------------|------------------|----------------------------|----------------------------|------------------|-----------------|
| ...I have felt cheerful and in good spirits                   | 0          | 1                | 2                          | 3                          | 4                | 5               |
| ...I have felt calm and relaxed                               | 0          | 1                | 2                          | 3                          | 4                | 5               |
| ...I have felt active and vigorous                            | 0          | 1                | 2                          | 3                          | 4                | 5               |
| ...I woke up feeling fresh and rested                         | 0          | 1                | 2                          | 3                          | 4                | 5               |
| ...my daily life has been filled with things that interest me | 0          | 1                | 2                          | 3                          | 4                | 5               |

## Day 7: \_\_\_\_\_

ketone bodies (mg/dl):  0  5  15  40  80  160

- diet:**  800 kcal  1.200 kcal  1.800 kcal  
supplements:  none  fish  
 others: \_\_\_\_\_
- digestive rest day:**  rice  potato/vegetables  
 fruit  others: \_\_\_\_\_
- fasting:** honey  no  yes  
noon: juice (¼ l)  no  yes  
vegetable soup (¼ l)  no  yes  
evening: vegetable soup (¼ l)  no  yes  
supplements:  none  Kousmine  Kousmine vegan  
 yoghurt  oatmeal soup  
 rice soup  carrot juice  
 green tea  black tea  
 others: \_\_\_\_\_
- day of breaking the fast**
- building up day:**  1  2  3  4

### physical well-being:

very bad

|   |   |   |   |   |   |   |   |   |   |    |
|---|---|---|---|---|---|---|---|---|---|----|
| 0 | 1 | 2 | 3 | 4 | 5 | 6 | 7 | 8 | 9 | 10 |
|---|---|---|---|---|---|---|---|---|---|----|

excellent

### emotional well-being:

very bad

|   |   |   |   |   |   |   |   |   |   |    |
|---|---|---|---|---|---|---|---|---|---|----|
| 0 | 1 | 2 | 3 | 4 | 5 | 6 | 7 | 8 | 9 | 10 |
|---|---|---|---|---|---|---|---|---|---|----|

excellent

**symptoms that occurred in the clinic:**       no       yes

- |                                                        |                                            |
|--------------------------------------------------------|--------------------------------------------|
| <input type="checkbox"/> headache                      | <input type="checkbox"/> muscle pains      |
| <input type="checkbox"/> sleep disturbances            | <input type="checkbox"/> heartburn         |
| <input type="checkbox"/> bad breath<br>(ask the nurse) | <input type="checkbox"/> nausea            |
| <input type="checkbox"/> tiredness                     | <input type="checkbox"/> dry mouth         |
| <input type="checkbox"/> back pain                     | <input type="checkbox"/> cramp in the calf |
| <input type="checkbox"/> sensitivity to cold           | <input type="checkbox"/> diarrhea          |
| <input type="checkbox"/> vertigo                       | <input type="checkbox"/> restless legs     |
| <input type="checkbox"/> hunger                        | <input type="checkbox"/> obstipation       |
| <input type="checkbox"/> skin rash                     | <input type="checkbox"/> palpitations      |
| <input type="checkbox"/> abdominal bloating            | <input type="checkbox"/> blurred vision    |
| <input type="checkbox"/> others: _____                 | <input type="checkbox"/> cravings          |

| <b>Today...</b>                                               | At no time | Some of the time | Less than half of the time | More than half of the time | Most of the time | All of the time |
|---------------------------------------------------------------|------------|------------------|----------------------------|----------------------------|------------------|-----------------|
| ...I have felt cheerful and in good spirits                   | 0          | 1                | 2                          | 3                          | 4                | 5               |
| ...I have felt calm and relaxed                               | 0          | 1                | 2                          | 3                          | 4                | 5               |
| ...I have felt active and vigorous                            | 0          | 1                | 2                          | 3                          | 4                | 5               |
| ...I woke up feeling fresh and rested                         | 0          | 1                | 2                          | 3                          | 4                | 5               |
| ...my daily life has been filled with things that interest me | 0          | 1                | 2                          | 3                          | 4                | 5               |

## Day 8: \_\_\_\_\_

ketone bodies (mg/dl):  0  5  15  40  80  160

- diet:**  800 kcal  1.200 kcal  1.800 kcal  
supplements:  none  fish  
 others: \_\_\_\_\_
- digestive rest day:**  rice  potato/vegetables  
 fruit  others: \_\_\_\_\_
- fasting:** honey  no  yes  
noon: juice (¼ l)  no  yes  
vegetable soup (¼ l)  no  yes  
evening: vegetable soup (¼ l)  no  yes  
supplements:  none  Kousmine  Kousmine vegan  
 yoghurt  oatmeal soup  
 rice soup  carrot juice  
 green tea  black tea  
 others: \_\_\_\_\_
- day of breaking the fast**
- building up day:**  1  2  3  4

### physical well-being:

very bad

|   |   |   |   |   |   |   |   |   |   |    |
|---|---|---|---|---|---|---|---|---|---|----|
| 0 | 1 | 2 | 3 | 4 | 5 | 6 | 7 | 8 | 9 | 10 |
|---|---|---|---|---|---|---|---|---|---|----|

excellent

### emotional well-being:

very bad

|   |   |   |   |   |   |   |   |   |   |    |
|---|---|---|---|---|---|---|---|---|---|----|
| 0 | 1 | 2 | 3 | 4 | 5 | 6 | 7 | 8 | 9 | 10 |
|---|---|---|---|---|---|---|---|---|---|----|

excellent

**symptoms that occurred in the clinic:**       no       yes

- |                                                        |                                            |
|--------------------------------------------------------|--------------------------------------------|
| <input type="checkbox"/> headache                      | <input type="checkbox"/> muscle pains      |
| <input type="checkbox"/> sleep disturbances            | <input type="checkbox"/> heartburn         |
| <input type="checkbox"/> bad breath<br>(ask the nurse) | <input type="checkbox"/> nausea            |
| <input type="checkbox"/> tiredness                     | <input type="checkbox"/> dry mouth         |
| <input type="checkbox"/> back pain                     | <input type="checkbox"/> cramp in the calf |
| <input type="checkbox"/> sensitivity to cold           | <input type="checkbox"/> diarrhea          |
| <input type="checkbox"/> vertigo                       | <input type="checkbox"/> restless legs     |
| <input type="checkbox"/> hunger                        | <input type="checkbox"/> obstipation       |
| <input type="checkbox"/> skin rash                     | <input type="checkbox"/> palpitations      |
| <input type="checkbox"/> abdominal bloating            | <input type="checkbox"/> blurred vision    |
| <input type="checkbox"/> others: _____                 | <input type="checkbox"/> cravings          |

**Today...**

|                                                               | At no time | Some of the time | Less than half of the time | More than half of the time | Most of the time | All of the time |
|---------------------------------------------------------------|------------|------------------|----------------------------|----------------------------|------------------|-----------------|
| ...I have felt cheerful and in good spirits                   | 0          | 1                | 2                          | 3                          | 4                | 5               |
| ...I have felt calm and relaxed                               | 0          | 1                | 2                          | 3                          | 4                | 5               |
| ...I have felt active and vigorous                            | 0          | 1                | 2                          | 3                          | 4                | 5               |
| ...I woke up feeling fresh and rested                         | 0          | 1                | 2                          | 3                          | 4                | 5               |
| ...my daily life has been filled with things that interest me | 0          | 1                | 2                          | 3                          | 4                | 5               |

## Day 9: \_\_\_\_\_

**ketone bodies** (mg/dl):  0  5  15  40  80  160

- diet:**  800 kcal  1.200 kcal  1.800 kcal  
supplements:  none  fish  
 others: \_\_\_\_\_
- digestive rest day:**  rice  potato/vegetables  
 fruit  others: \_\_\_\_\_
- fasting:** honey  no  yes  
noon: juice (¼ l)  no  yes  
vegetable soup (¼ l)  no  yes  
evening: vegetable soup (¼ l)  no  yes  
supplements:  none  Kousmine  Kousmine vegan  
 yoghurt  oatmeal soup  
 rice soup  carrot juice  
 green tea  black tea  
 others: \_\_\_\_\_
- day of breaking the fast**
- building up day:**  1  2  3  4

### physical well-being:

very bad

|   |   |   |   |   |   |   |   |   |   |    |
|---|---|---|---|---|---|---|---|---|---|----|
| 0 | 1 | 2 | 3 | 4 | 5 | 6 | 7 | 8 | 9 | 10 |
|---|---|---|---|---|---|---|---|---|---|----|

excellent

### emotional well-being:

very bad

|   |   |   |   |   |   |   |   |   |   |    |
|---|---|---|---|---|---|---|---|---|---|----|
| 0 | 1 | 2 | 3 | 4 | 5 | 6 | 7 | 8 | 9 | 10 |
|---|---|---|---|---|---|---|---|---|---|----|

excellent



**symptoms that occurred in the clinic:**       no       yes

- |                                                        |                                            |
|--------------------------------------------------------|--------------------------------------------|
| <input type="checkbox"/> headache                      | <input type="checkbox"/> muscle pains      |
| <input type="checkbox"/> sleep disturbances            | <input type="checkbox"/> heartburn         |
| <input type="checkbox"/> bad breath<br>(ask the nurse) | <input type="checkbox"/> nausea            |
| <input type="checkbox"/> tiredness                     | <input type="checkbox"/> dry mouth         |
| <input type="checkbox"/> back pain                     | <input type="checkbox"/> cramp in the calf |
| <input type="checkbox"/> sensitivity to cold           | <input type="checkbox"/> diarrhea          |
| <input type="checkbox"/> vertigo                       | <input type="checkbox"/> restless legs     |
| <input type="checkbox"/> hunger                        | <input type="checkbox"/> obstipation       |
| <input type="checkbox"/> skin rash                     | <input type="checkbox"/> palpitations      |
| <input type="checkbox"/> abdominal bloating            | <input type="checkbox"/> blurred vision    |
| <input type="checkbox"/> others: _____                 | <input type="checkbox"/> cravings          |

| <b>Today...</b>                                               | At no time | Some of the time | Less than half of the time | More than half of the time | Most of the time | All of the time |
|---------------------------------------------------------------|------------|------------------|----------------------------|----------------------------|------------------|-----------------|
| ...I have felt cheerful and in good spirits                   | 0          | 1                | 2                          | 3                          | 4                | 5               |
| ...I have felt calm and relaxed                               | 0          | 1                | 2                          | 3                          | 4                | 5               |
| ...I have felt active and vigorous                            | 0          | 1                | 2                          | 3                          | 4                | 5               |
| ...I woke up feeling fresh and rested                         | 0          | 1                | 2                          | 3                          | 4                | 5               |
| ...my daily life has been filled with things that interest me | 0          | 1                | 2                          | 3                          | 4                | 5               |

## Day 10: \_\_\_\_\_

**ketone bodies** (mg/dl):  0  5  15  40  80  160

- diet:**  800 kcal  1.200 kcal  1.800 kcal  
supplements:  none  fish  
 others: \_\_\_\_\_
- digestive rest day:**  rice  potato/vegetables  
 fruit  others: \_\_\_\_\_
- fasting:** honey  no  yes  
noon: juice (¼ l)  no  yes  
vegetable soup (¼ l)  no  yes  
evening: vegetable soup (¼ l)  no  yes  
supplements:  none  Kousmine  Kousmine vegan  
 yoghurt  oatmeal soup  
 rice soup  carrot juice  
 green tea  black tea  
 others: \_\_\_\_\_
- day of breaking the fast**
- building up day:**  1  2  3  4

### physical well-being:

very bad

|   |   |   |   |   |   |   |   |   |   |    |
|---|---|---|---|---|---|---|---|---|---|----|
| 0 | 1 | 2 | 3 | 4 | 5 | 6 | 7 | 8 | 9 | 10 |
|---|---|---|---|---|---|---|---|---|---|----|

excellent

### emotional well-being:

very bad

|   |   |   |   |   |   |   |   |   |   |    |
|---|---|---|---|---|---|---|---|---|---|----|
| 0 | 1 | 2 | 3 | 4 | 5 | 6 | 7 | 8 | 9 | 10 |
|---|---|---|---|---|---|---|---|---|---|----|

excellent

**symptoms that occurred in the clinic:**       no       yes

- |                                                        |                                            |
|--------------------------------------------------------|--------------------------------------------|
| <input type="checkbox"/> headache                      | <input type="checkbox"/> muscle pains      |
| <input type="checkbox"/> sleep disturbances            | <input type="checkbox"/> heartburn         |
| <input type="checkbox"/> bad breath<br>(ask the nurse) | <input type="checkbox"/> nausea            |
| <input type="checkbox"/> tiredness                     | <input type="checkbox"/> dry mouth         |
| <input type="checkbox"/> back pain                     | <input type="checkbox"/> cramp in the calf |
| <input type="checkbox"/> sensitivity to cold           | <input type="checkbox"/> diarrhea          |
| <input type="checkbox"/> vertigo                       | <input type="checkbox"/> restless legs     |
| <input type="checkbox"/> hunger                        | <input type="checkbox"/> obstipation       |
| <input type="checkbox"/> skin rash                     | <input type="checkbox"/> palpitations      |
| <input type="checkbox"/> abdominal bloating            | <input type="checkbox"/> blurred vision    |
| <input type="checkbox"/> others: _____                 | <input type="checkbox"/> cravings          |

**Today...**

|                                                               | At no time | Some of the time | Less than half of the time | More than half of the time | Most of the time | All of the time |
|---------------------------------------------------------------|------------|------------------|----------------------------|----------------------------|------------------|-----------------|
| ...I have felt cheerful and in good spirits                   | 0          | 1                | 2                          | 3                          | 4                | 5               |
| ...I have felt calm and relaxed                               | 0          | 1                | 2                          | 3                          | 4                | 5               |
| ...I have felt active and vigorous                            | 0          | 1                | 2                          | 3                          | 4                | 5               |
| ...I woke up feeling fresh and rested                         | 0          | 1                | 2                          | 3                          | 4                | 5               |
| ...my daily life has been filled with things that interest me | 0          | 1                | 2                          | 3                          | 4                | 5               |

## Day 11: \_\_\_\_\_

**ketone bodies** (mg/dl):  0  5  15  40  80  160

- diet:**  800 kcal  1.200 kcal  1.800 kcal  
supplements:  none  fish  
 others: \_\_\_\_\_
- digestive rest day:**  rice  potato/vegetables  
 fruit  others: \_\_\_\_\_
- fasting:** honey  no  yes  
noon: juice (¼ l)  no  yes  
vegetable soup (¼ l)  no  yes  
evening: vegetable soup (¼ l)  no  yes  
supplements:  none  Kousmine  Kousmine vegan  
 yoghurt  oatmeal soup  
 rice soup  carrot juice  
 green tea  black tea  
 others: \_\_\_\_\_
- day of breaking the fast**
- building up day:**  1  2  3  4

### physical well-being:

very bad

|   |   |   |   |   |   |   |   |   |   |    |
|---|---|---|---|---|---|---|---|---|---|----|
| 0 | 1 | 2 | 3 | 4 | 5 | 6 | 7 | 8 | 9 | 10 |
|---|---|---|---|---|---|---|---|---|---|----|

excellent

### emotional well-being:

very bad

|   |   |   |   |   |   |   |   |   |   |    |
|---|---|---|---|---|---|---|---|---|---|----|
| 0 | 1 | 2 | 3 | 4 | 5 | 6 | 7 | 8 | 9 | 10 |
|---|---|---|---|---|---|---|---|---|---|----|

excellent

**symptoms that occurred in the clinic:**       no       yes

- |                                              |                                            |
|----------------------------------------------|--------------------------------------------|
| <input type="checkbox"/> headache            | <input type="checkbox"/> muscle pains      |
| <input type="checkbox"/> sleep disturbances  | <input type="checkbox"/> heartburn         |
| <input type="checkbox"/> bad breath          | <input type="checkbox"/> nausea            |
| (ask the nurse)                              | <input type="checkbox"/> dry mouth         |
| <input type="checkbox"/> tiredness           | <input type="checkbox"/> cramp in the calf |
| <input type="checkbox"/> back pain           | <input type="checkbox"/> diarrhea          |
| <input type="checkbox"/> sensitivity to cold | <input type="checkbox"/> restless legs     |
| <input type="checkbox"/> vertigo             | <input type="checkbox"/> obstipation       |
| <input type="checkbox"/> hunger              | <input type="checkbox"/> palpitations      |
| <input type="checkbox"/> skin rash           | <input type="checkbox"/> blurred vision    |
| <input type="checkbox"/> abdominal bloating  | <input type="checkbox"/> cravings          |
| <input type="checkbox"/> others: _____       |                                            |

**Today...**

|                                                               | At no time | Some of the time | Less than half of the time | More than half of the time | Most of the time | All of the time |
|---------------------------------------------------------------|------------|------------------|----------------------------|----------------------------|------------------|-----------------|
| ...I have felt cheerful and in good spirits                   | 0          | 1                | 2                          | 3                          | 4                | 5               |
| ...I have felt calm and relaxed                               | 0          | 1                | 2                          | 3                          | 4                | 5               |
| ...I have felt active and vigorous                            | 0          | 1                | 2                          | 3                          | 4                | 5               |
| ...I woke up feeling fresh and rested                         | 0          | 1                | 2                          | 3                          | 4                | 5               |
| ...my daily life has been filled with things that interest me | 0          | 1                | 2                          | 3                          | 4                | 5               |

## Day 12: \_\_\_\_\_

**ketone bodies** (mg/dl):  0  5  15  40  80  160

- diet:**  800 kcal  1.200 kcal  1.800 kcal  
supplements:  none  fish  
 others: \_\_\_\_\_
- digestive rest day:**  rice  potato/vegetables  
 fruit  others: \_\_\_\_\_
- fasting:** honey  no  yes  
noon: juice (¼ l)  no  yes  
vegetable soup (¼ l)  no  yes  
evening: vegetable soup (¼ l)  no  yes  
supplements:  none  Kousmine  Kousmine vegan  
 yoghurt  oatmeal soup  
 rice soup  carrot juice  
 green tea  black tea  
 others: \_\_\_\_\_
- day of breaking the fast**
- building up day:**  1  2  3  4

### physical well-being:

very bad

|   |   |   |   |   |   |   |   |   |   |    |
|---|---|---|---|---|---|---|---|---|---|----|
| 0 | 1 | 2 | 3 | 4 | 5 | 6 | 7 | 8 | 9 | 10 |
|---|---|---|---|---|---|---|---|---|---|----|

excellent

### emotional well-being:

very bad

|   |   |   |   |   |   |   |   |   |   |    |
|---|---|---|---|---|---|---|---|---|---|----|
| 0 | 1 | 2 | 3 | 4 | 5 | 6 | 7 | 8 | 9 | 10 |
|---|---|---|---|---|---|---|---|---|---|----|

excellent

**symptoms that occurred in the clinic:**       no       yes

- |                                                        |                                            |
|--------------------------------------------------------|--------------------------------------------|
| <input type="checkbox"/> headache                      | <input type="checkbox"/> muscle pains      |
| <input type="checkbox"/> sleep disturbances            | <input type="checkbox"/> heartburn         |
| <input type="checkbox"/> bad breath<br>(ask the nurse) | <input type="checkbox"/> nausea            |
| <input type="checkbox"/> tiredness                     | <input type="checkbox"/> dry mouth         |
| <input type="checkbox"/> back pain                     | <input type="checkbox"/> cramp in the calf |
| <input type="checkbox"/> sensitivity to cold           | <input type="checkbox"/> diarrhea          |
| <input type="checkbox"/> vertigo                       | <input type="checkbox"/> restless legs     |
| <input type="checkbox"/> hunger                        | <input type="checkbox"/> obstipation       |
| <input type="checkbox"/> skin rash                     | <input type="checkbox"/> palpitations      |
| <input type="checkbox"/> abdominal bloating            | <input type="checkbox"/> blurred vision    |
| <input type="checkbox"/> others: _____                 | <input type="checkbox"/> cravings          |

| <b>Today...</b>                                               | At no time | Some of the time | Less than half of the time | More than half of the time | Most of the time | All of the time |
|---------------------------------------------------------------|------------|------------------|----------------------------|----------------------------|------------------|-----------------|
| ...I have felt cheerful and in good spirits                   | 0          | 1                | 2                          | 3                          | 4                | 5               |
| ...I have felt calm and relaxed                               | 0          | 1                | 2                          | 3                          | 4                | 5               |
| ...I have felt active and vigorous                            | 0          | 1                | 2                          | 3                          | 4                | 5               |
| ...I woke up feeling fresh and rested                         | 0          | 1                | 2                          | 3                          | 4                | 5               |
| ...my daily life has been filled with things that interest me | 0          | 1                | 2                          | 3                          | 4                | 5               |

## Day 13: \_\_\_\_\_

**ketone bodies** (mg/dl):  0  5  15  40  80  160

- diet:**  800 kcal  1.200 kcal  1.800 kcal  
supplements:  none  fish  
 others: \_\_\_\_\_
- digestive rest day:**  rice  potato/vegetables  
 fruit  others: \_\_\_\_\_
- fasting:** honey  no  yes  
noon: juice (¼ l)  no  yes  
vegetable soup (¼ l)  no  yes  
evening: vegetable soup (¼ l)  no  yes  
supplements:  none  Kousmine  Kousmine vegan  
 yoghurt  oatmeal soup  
 rice soup  carrot juice  
 green tea  black tea  
 others: \_\_\_\_\_
- day of breaking the fast**
- building up day:**  1  2  3  4

### physical well-being:

very bad

|   |   |   |   |   |   |   |   |   |   |    |
|---|---|---|---|---|---|---|---|---|---|----|
| 0 | 1 | 2 | 3 | 4 | 5 | 6 | 7 | 8 | 9 | 10 |
|---|---|---|---|---|---|---|---|---|---|----|

excellent

### emotional well-being:

very bad

|   |   |   |   |   |   |   |   |   |   |    |
|---|---|---|---|---|---|---|---|---|---|----|
| 0 | 1 | 2 | 3 | 4 | 5 | 6 | 7 | 8 | 9 | 10 |
|---|---|---|---|---|---|---|---|---|---|----|

excellent



**symptoms that occurred in the clinic:**       no       yes

- |                                                        |                                            |
|--------------------------------------------------------|--------------------------------------------|
| <input type="checkbox"/> headache                      | <input type="checkbox"/> muscle pains      |
| <input type="checkbox"/> sleep disturbances            | <input type="checkbox"/> heartburn         |
| <input type="checkbox"/> bad breath<br>(ask the nurse) | <input type="checkbox"/> nausea            |
| <input type="checkbox"/> tiredness                     | <input type="checkbox"/> dry mouth         |
| <input type="checkbox"/> back pain                     | <input type="checkbox"/> cramp in the calf |
| <input type="checkbox"/> sensitivity to cold           | <input type="checkbox"/> diarrhea          |
| <input type="checkbox"/> vertigo                       | <input type="checkbox"/> restless legs     |
| <input type="checkbox"/> hunger                        | <input type="checkbox"/> obstipation       |
| <input type="checkbox"/> skin rash                     | <input type="checkbox"/> palpitations      |
| <input type="checkbox"/> abdominal bloating            | <input type="checkbox"/> blurred vision    |
| <input type="checkbox"/> others: _____                 | <input type="checkbox"/> cravings          |

| <b>Today...</b>                                               | At no time | Some of the time | Less than half of the time | More than half of the time | Most of the time | All of the time |
|---------------------------------------------------------------|------------|------------------|----------------------------|----------------------------|------------------|-----------------|
| ...I have felt cheerful and in good spirits                   | 0          | 1                | 2                          | 3                          | 4                | 5               |
| ...I have felt calm and relaxed                               | 0          | 1                | 2                          | 3                          | 4                | 5               |
| ...I have felt active and vigorous                            | 0          | 1                | 2                          | 3                          | 4                | 5               |
| ...I woke up feeling fresh and rested                         | 0          | 1                | 2                          | 3                          | 4                | 5               |
| ...my daily life has been filled with things that interest me | 0          | 1                | 2                          | 3                          | 4                | 5               |

## Day 14: \_\_\_\_\_

ketone bodies (mg/dl):  0  5  15  40  80  160

- diet:**       800 kcal       1.200 kcal       1.800 kcal  
supplements:  none     fish  
 others: \_\_\_\_\_
- digestive rest day:**       rice       potato/vegetables  
 fruit       others: \_\_\_\_\_
- fasting:**      honey       no       yes  
noon:      juice (¼ l)       no       yes  
            vegetable soup (¼ l)       no       yes  
evening:      vegetable soup (¼ l)       no       yes  
supplements:  none     Kousmine       Kousmine vegan  
 yoghurt       oatmeal soup  
 rice soup       carrot juice  
 green tea       black tea  
 others: \_\_\_\_\_
- day of breaking the fast**
- building up day:**     1     2     3     4

### physical well-being:

very bad

|   |   |   |   |   |   |   |   |   |   |    |
|---|---|---|---|---|---|---|---|---|---|----|
| 0 | 1 | 2 | 3 | 4 | 5 | 6 | 7 | 8 | 9 | 10 |
|---|---|---|---|---|---|---|---|---|---|----|

excellent

### emotional well-being:

very bad

|   |   |   |   |   |   |   |   |   |   |    |
|---|---|---|---|---|---|---|---|---|---|----|
| 0 | 1 | 2 | 3 | 4 | 5 | 6 | 7 | 8 | 9 | 10 |
|---|---|---|---|---|---|---|---|---|---|----|

excellent

**symptoms that occurred in the clinic:**       no       yes

- |                                                        |                                            |
|--------------------------------------------------------|--------------------------------------------|
| <input type="checkbox"/> headache                      | <input type="checkbox"/> muscle pains      |
| <input type="checkbox"/> sleep disturbances            | <input type="checkbox"/> heartburn         |
| <input type="checkbox"/> bad breath<br>(ask the nurse) | <input type="checkbox"/> nausea            |
| <input type="checkbox"/> tiredness                     | <input type="checkbox"/> dry mouth         |
| <input type="checkbox"/> back pain                     | <input type="checkbox"/> cramp in the calf |
| <input type="checkbox"/> sensitivity to cold           | <input type="checkbox"/> diarrhea          |
| <input type="checkbox"/> vertigo                       | <input type="checkbox"/> restless legs     |
| <input type="checkbox"/> hunger                        | <input type="checkbox"/> obstipation       |
| <input type="checkbox"/> skin rash                     | <input type="checkbox"/> palpitations      |
| <input type="checkbox"/> abdominal bloating            | <input type="checkbox"/> blurred vision    |
| <input type="checkbox"/> others: _____                 | <input type="checkbox"/> cravings          |

| <b>Today...</b>                                               | At no time | Some of the time | Less than half of the time | More than half of the time | Most of the time | All of the time |
|---------------------------------------------------------------|------------|------------------|----------------------------|----------------------------|------------------|-----------------|
| ...I have felt cheerful and in good spirits                   | 0          | 1                | 2                          | 3                          | 4                | 5               |
| ...I have felt calm and relaxed                               | 0          | 1                | 2                          | 3                          | 4                | 5               |
| ...I have felt active and vigorous                            | 0          | 1                | 2                          | 3                          | 4                | 5               |
| ...I woke up feeling fresh and rested                         | 0          | 1                | 2                          | 3                          | 4                | 5               |
| ...my daily life has been filled with things that interest me | 0          | 1                | 2                          | 3                          | 4                | 5               |

## Day 15: \_\_\_\_\_

**ketone bodies** (mg/dl):  0  5  15  40  80  160

- diet:**  800 kcal  1.200 kcal  1.800 kcal  
supplements:  none  fish  
 others: \_\_\_\_\_
- digestive rest day:**  rice  potato/vegetables  
 fruit  others: \_\_\_\_\_
- fasting:** honey  no  yes  
noon: juice (¼ l)  no  yes  
vegetable soup (¼ l)  no  yes  
evening: vegetable soup (¼ l)  no  yes  
supplements:  none  Kousmine  Kousmine vegan  
 yoghurt  oatmeal soup  
 rice soup  carrot juice  
 green tea  black tea  
 others: \_\_\_\_\_
- day of breaking the fast**
- building up day:**  1  2  3  4

### physical well-being:

very bad

|   |   |   |   |   |   |   |   |   |   |    |
|---|---|---|---|---|---|---|---|---|---|----|
| 0 | 1 | 2 | 3 | 4 | 5 | 6 | 7 | 8 | 9 | 10 |
|---|---|---|---|---|---|---|---|---|---|----|

excellent

### emotional well-being:

very bad

|   |   |   |   |   |   |   |   |   |   |    |
|---|---|---|---|---|---|---|---|---|---|----|
| 0 | 1 | 2 | 3 | 4 | 5 | 6 | 7 | 8 | 9 | 10 |
|---|---|---|---|---|---|---|---|---|---|----|

excellent

**symptoms that occurred in the clinic:**       no       yes

- |                                                        |                                            |
|--------------------------------------------------------|--------------------------------------------|
| <input type="checkbox"/> headache                      | <input type="checkbox"/> muscle pains      |
| <input type="checkbox"/> sleep disturbances            | <input type="checkbox"/> heartburn         |
| <input type="checkbox"/> bad breath<br>(ask the nurse) | <input type="checkbox"/> nausea            |
| <input type="checkbox"/> tiredness                     | <input type="checkbox"/> dry mouth         |
| <input type="checkbox"/> back pain                     | <input type="checkbox"/> cramp in the calf |
| <input type="checkbox"/> sensitivity to cold           | <input type="checkbox"/> diarrhea          |
| <input type="checkbox"/> vertigo                       | <input type="checkbox"/> restless legs     |
| <input type="checkbox"/> hunger                        | <input type="checkbox"/> obstipation       |
| <input type="checkbox"/> skin rash                     | <input type="checkbox"/> palpitations      |
| <input type="checkbox"/> abdominal bloating            | <input type="checkbox"/> blurred vision    |
| <input type="checkbox"/> others: _____                 | <input type="checkbox"/> cravings          |

| <b>Today...</b>                                               | At no time | Some of the time | Less than half of the time | More than half of the time | Most of the time | All of the time |
|---------------------------------------------------------------|------------|------------------|----------------------------|----------------------------|------------------|-----------------|
| ...I have felt cheerful and in good spirits                   | 0          | 1                | 2                          | 3                          | 4                | 5               |
| ...I have felt calm and relaxed                               | 0          | 1                | 2                          | 3                          | 4                | 5               |
| ...I have felt active and vigorous                            | 0          | 1                | 2                          | 3                          | 4                | 5               |
| ...I woke up feeling fresh and rested                         | 0          | 1                | 2                          | 3                          | 4                | 5               |
| ...my daily life has been filled with things that interest me | 0          | 1                | 2                          | 3                          | 4                | 5               |

## Day 16: \_\_\_\_\_

**ketone bodies** (mg/dl):  0  5  15  40  80  160

- diet:**  800 kcal  1.200 kcal  1.800 kcal  
supplements:  none  fish  
 others: \_\_\_\_\_
- digestive rest day:**  rice  potato/vegetables  
 fruit  others: \_\_\_\_\_
- fasting:** honey  no  yes  
noon: juice (¼ l)  no  yes  
vegetable soup (¼ l)  no  yes  
evening: vegetable soup (¼ l)  no  yes  
supplements:  none  Kousmine  Kousmine vegan  
 yoghurt  oatmeal soup  
 rice soup  carrot juice  
 green tea  black tea  
 others: \_\_\_\_\_
- day of breaking the fast**
- building up day:**  1  2  3  4

### physical well-being:

very bad

|   |   |   |   |   |   |   |   |   |   |    |
|---|---|---|---|---|---|---|---|---|---|----|
| 0 | 1 | 2 | 3 | 4 | 5 | 6 | 7 | 8 | 9 | 10 |
|---|---|---|---|---|---|---|---|---|---|----|

excellent

### emotional well-being:

very bad

|   |   |   |   |   |   |   |   |   |   |    |
|---|---|---|---|---|---|---|---|---|---|----|
| 0 | 1 | 2 | 3 | 4 | 5 | 6 | 7 | 8 | 9 | 10 |
|---|---|---|---|---|---|---|---|---|---|----|

excellent

**symptoms that occurred in the clinic:**       no       yes

- |                                                        |                                            |
|--------------------------------------------------------|--------------------------------------------|
| <input type="checkbox"/> headache                      | <input type="checkbox"/> muscle pains      |
| <input type="checkbox"/> sleep disturbances            | <input type="checkbox"/> heartburn         |
| <input type="checkbox"/> bad breath<br>(ask the nurse) | <input type="checkbox"/> nausea            |
| <input type="checkbox"/> tiredness                     | <input type="checkbox"/> dry mouth         |
| <input type="checkbox"/> back pain                     | <input type="checkbox"/> cramp in the calf |
| <input type="checkbox"/> sensitivity to cold           | <input type="checkbox"/> diarrhea          |
| <input type="checkbox"/> vertigo                       | <input type="checkbox"/> restless legs     |
| <input type="checkbox"/> hunger                        | <input type="checkbox"/> obstipation       |
| <input type="checkbox"/> skin rash                     | <input type="checkbox"/> palpitations      |
| <input type="checkbox"/> abdominal bloating            | <input type="checkbox"/> blurred vision    |
| <input type="checkbox"/> others: _____                 | <input type="checkbox"/> cravings          |

| <b>Today...</b>                                               | At no time | Some of the time | Less than half of the time | More than half of the time | Most of the time | All of the time |
|---------------------------------------------------------------|------------|------------------|----------------------------|----------------------------|------------------|-----------------|
| ...I have felt cheerful and in good spirits                   | 0          | 1                | 2                          | 3                          | 4                | 5               |
| ...I have felt calm and relaxed                               | 0          | 1                | 2                          | 3                          | 4                | 5               |
| ...I have felt active and vigorous                            | 0          | 1                | 2                          | 3                          | 4                | 5               |
| ...I woke up feeling fresh and rested                         | 0          | 1                | 2                          | 3                          | 4                | 5               |
| ...my daily life has been filled with things that interest me | 0          | 1                | 2                          | 3                          | 4                | 5               |

## Day 17: \_\_\_\_\_

**ketone bodies** (mg/dl):  0  5  15  40  80  160

- diet:**  800 kcal  1.200 kcal  1.800 kcal  
supplements:  none  fish  
 others: \_\_\_\_\_
- digestive rest day:**  rice  potato/vegetables  
 fruit  others: \_\_\_\_\_
- fasting:** honey  no  yes  
noon: juice (¼ l)  no  yes  
vegetable soup (¼ l)  no  yes  
evening: vegetable soup (¼ l)  no  yes  
supplements:  none  Kousmine  Kousmine vegan  
 yoghurt  oatmeal soup  
 rice soup  carrot juice  
 green tea  black tea  
 others: \_\_\_\_\_
- day of breaking the fast**
- building up day:**  1  2  3  4

### physical well-being:

very bad

|   |   |   |   |   |   |   |   |   |   |    |
|---|---|---|---|---|---|---|---|---|---|----|
| 0 | 1 | 2 | 3 | 4 | 5 | 6 | 7 | 8 | 9 | 10 |
|---|---|---|---|---|---|---|---|---|---|----|

excellent

### emotional well-being:

very bad

|   |   |   |   |   |   |   |   |   |   |    |
|---|---|---|---|---|---|---|---|---|---|----|
| 0 | 1 | 2 | 3 | 4 | 5 | 6 | 7 | 8 | 9 | 10 |
|---|---|---|---|---|---|---|---|---|---|----|

excellent



**symptoms that occurred in the clinic:**       no       yes

- |                                                        |                                            |
|--------------------------------------------------------|--------------------------------------------|
| <input type="checkbox"/> headache                      | <input type="checkbox"/> muscle pains      |
| <input type="checkbox"/> sleep disturbances            | <input type="checkbox"/> heartburn         |
| <input type="checkbox"/> bad breath<br>(ask the nurse) | <input type="checkbox"/> nausea            |
| <input type="checkbox"/> tiredness                     | <input type="checkbox"/> dry mouth         |
| <input type="checkbox"/> back pain                     | <input type="checkbox"/> cramp in the calf |
| <input type="checkbox"/> sensitivity to cold           | <input type="checkbox"/> diarrhea          |
| <input type="checkbox"/> vertigo                       | <input type="checkbox"/> restless legs     |
| <input type="checkbox"/> hunger                        | <input type="checkbox"/> obstipation       |
| <input type="checkbox"/> skin rash                     | <input type="checkbox"/> palpitations      |
| <input type="checkbox"/> abdominal bloating            | <input type="checkbox"/> blurred vision    |
| <input type="checkbox"/> others: _____                 | <input type="checkbox"/> cravings          |

| <b>Today...</b>                                               | At no time | Some of the time | Less than half of the time | More than half of the time | Most of the time | All of the time |
|---------------------------------------------------------------|------------|------------------|----------------------------|----------------------------|------------------|-----------------|
| ...I have felt cheerful and in good spirits                   | 0          | 1                | 2                          | 3                          | 4                | 5               |
| ...I have felt calm and relaxed                               | 0          | 1                | 2                          | 3                          | 4                | 5               |
| ...I have felt active and vigorous                            | 0          | 1                | 2                          | 3                          | 4                | 5               |
| ...I woke up feeling fresh and rested                         | 0          | 1                | 2                          | 3                          | 4                | 5               |
| ...my daily life has been filled with things that interest me | 0          | 1                | 2                          | 3                          | 4                | 5               |

## Day 18: \_\_\_\_\_

**ketone bodies** (mg/dl):  0  5  15  40  80  160

- diet:**  800 kcal  1.200 kcal  1.800 kcal  
supplements:  none  fish  
 others: \_\_\_\_\_
- digestive rest day:**  rice  potato/vegetables  
 fruit  others: \_\_\_\_\_
- fasting:** honey  no  yes  
noon: juice (¼ l)  no  yes  
vegetable soup (¼ l)  no  yes  
evening: vegetable soup (¼ l)  no  yes  
supplements:  none  Kousmine  Kousmine vegan  
 yoghurt  oatmeal soup  
 rice soup  carrot juice  
 green tea  black tea  
 others: \_\_\_\_\_
- day of breaking the fast**
- building up day:**  1  2  3  4

### physical well-being:

very bad

|   |   |   |   |   |   |   |   |   |   |    |
|---|---|---|---|---|---|---|---|---|---|----|
| 0 | 1 | 2 | 3 | 4 | 5 | 6 | 7 | 8 | 9 | 10 |
|---|---|---|---|---|---|---|---|---|---|----|

excellent

### emotional well-being:

very bad

|   |   |   |   |   |   |   |   |   |   |    |
|---|---|---|---|---|---|---|---|---|---|----|
| 0 | 1 | 2 | 3 | 4 | 5 | 6 | 7 | 8 | 9 | 10 |
|---|---|---|---|---|---|---|---|---|---|----|

excellent

**symptoms that occurred in the clinic:**       no       yes

- |                                              |                                            |
|----------------------------------------------|--------------------------------------------|
| <input type="checkbox"/> headache            | <input type="checkbox"/> muscle pains      |
| <input type="checkbox"/> sleep disturbances  | <input type="checkbox"/> heartburn         |
| <input type="checkbox"/> bad breath          | <input type="checkbox"/> nausea            |
| (ask the nurse)                              | <input type="checkbox"/> dry mouth         |
| <input type="checkbox"/> tiredness           | <input type="checkbox"/> cramp in the calf |
| <input type="checkbox"/> back pain           | <input type="checkbox"/> diarrhea          |
| <input type="checkbox"/> sensitivity to cold | <input type="checkbox"/> restless legs     |
| <input type="checkbox"/> vertigo             | <input type="checkbox"/> obstipation       |
| <input type="checkbox"/> hunger              | <input type="checkbox"/> palpitations      |
| <input type="checkbox"/> skin rash           | <input type="checkbox"/> blurred vision    |
| <input type="checkbox"/> abdominal bloating  | <input type="checkbox"/> cravings          |
| <input type="checkbox"/> others: _____       |                                            |

| <b>Today...</b>                                               | At no time | Some of the time | Less than half of the time | More than half of the time | Most of the time | All of the time |
|---------------------------------------------------------------|------------|------------------|----------------------------|----------------------------|------------------|-----------------|
| ...I have felt cheerful and in good spirits                   | 0          | 1                | 2                          | 3                          | 4                | 5               |
| ...I have felt calm and relaxed                               | 0          | 1                | 2                          | 3                          | 4                | 5               |
| ...I have felt active and vigorous                            | 0          | 1                | 2                          | 3                          | 4                | 5               |
| ...I woke up feeling fresh and rested                         | 0          | 1                | 2                          | 3                          | 4                | 5               |
| ...my daily life has been filled with things that interest me | 0          | 1                | 2                          | 3                          | 4                | 5               |

## Day 19: \_\_\_\_\_

**ketone bodies** (mg/dl):  0  5  15  40  80  160

- diet:**  800 kcal  1.200 kcal  1.800 kcal  
supplements:  none  fish  
 others: \_\_\_\_\_
- digestive rest day:**  rice  potato/vegetables  
 fruit  others: \_\_\_\_\_
- fasting:** honey  no  yes  
noon: juice (¼ l)  no  yes  
vegetable soup (¼ l)  no  yes  
evening: vegetable soup (¼ l)  no  yes  
supplements:  none  Kousmine  Kousmine vegan  
 yoghurt  oatmeal soup  
 rice soup  carrot juice  
 green tea  black tea  
 others: \_\_\_\_\_
- day of breaking the fast**
- building up day:**  1  2  3  4

### physical well-being:

very bad

|   |   |   |   |   |   |   |   |   |   |    |
|---|---|---|---|---|---|---|---|---|---|----|
| 0 | 1 | 2 | 3 | 4 | 5 | 6 | 7 | 8 | 9 | 10 |
|---|---|---|---|---|---|---|---|---|---|----|

excellent

### emotional well-being:

very bad

|   |   |   |   |   |   |   |   |   |   |    |
|---|---|---|---|---|---|---|---|---|---|----|
| 0 | 1 | 2 | 3 | 4 | 5 | 6 | 7 | 8 | 9 | 10 |
|---|---|---|---|---|---|---|---|---|---|----|

excellent

**symptoms that occurred in the clinic:**       no       yes

- |                                              |                                            |
|----------------------------------------------|--------------------------------------------|
| <input type="checkbox"/> headache            | <input type="checkbox"/> muscle pains      |
| <input type="checkbox"/> sleep disturbances  | <input type="checkbox"/> heartburn         |
| <input type="checkbox"/> bad breath          | <input type="checkbox"/> nausea            |
| (ask the nurse)                              | <input type="checkbox"/> dry mouth         |
| <input type="checkbox"/> tiredness           | <input type="checkbox"/> cramp in the calf |
| <input type="checkbox"/> back pain           | <input type="checkbox"/> diarrhea          |
| <input type="checkbox"/> sensitivity to cold | <input type="checkbox"/> restless legs     |
| <input type="checkbox"/> vertigo             | <input type="checkbox"/> obstipation       |
| <input type="checkbox"/> hunger              | <input type="checkbox"/> palpitations      |
| <input type="checkbox"/> skin rash           | <input type="checkbox"/> blurred vision    |
| <input type="checkbox"/> abdominal bloating  | <input type="checkbox"/> cravings          |
| <input type="checkbox"/> others: _____       |                                            |

| <b>Today...</b>                                               | At no time | Some of the time | Less than half of the time | More than half of the time | Most of the time | All of the time |
|---------------------------------------------------------------|------------|------------------|----------------------------|----------------------------|------------------|-----------------|
| ...I have felt cheerful and in good spirits                   | 0          | 1                | 2                          | 3                          | 4                | 5               |
| ...I have felt calm and relaxed                               | 0          | 1                | 2                          | 3                          | 4                | 5               |
| ...I have felt active and vigorous                            | 0          | 1                | 2                          | 3                          | 4                | 5               |
| ...I woke up feeling fresh and rested                         | 0          | 1                | 2                          | 3                          | 4                | 5               |
| ...my daily life has been filled with things that interest me | 0          | 1                | 2                          | 3                          | 4                | 5               |

## Day 20: \_\_\_\_\_

ketone bodies (mg/dl):  0  5  15  40  80  160

- diet:**  800 kcal  1.200 kcal  1.800 kcal  
supplements:  none  fish  
 others: \_\_\_\_\_
- digestive rest day:**  rice  potato/vegetables  
 fruit  others: \_\_\_\_\_
- fasting:** honey  no  yes  
noon: juice (¼ l)  no  yes  
vegetable soup (¼ l)  no  yes  
evening: vegetable soup (¼ l)  no  yes  
supplements:  none  Kousmine  Kousmine vegan  
 yoghurt  oatmeal soup  
 rice soup  carrot juice  
 green tea  black tea  
 others: \_\_\_\_\_
- day of breaking the fast**
- building up day:**  1  2  3  4

### physical well-being:

very bad

|   |   |   |   |   |   |   |   |   |   |    |
|---|---|---|---|---|---|---|---|---|---|----|
| 0 | 1 | 2 | 3 | 4 | 5 | 6 | 7 | 8 | 9 | 10 |
|---|---|---|---|---|---|---|---|---|---|----|

excellent

### emotional well-being:

very bad

|   |   |   |   |   |   |   |   |   |   |    |
|---|---|---|---|---|---|---|---|---|---|----|
| 0 | 1 | 2 | 3 | 4 | 5 | 6 | 7 | 8 | 9 | 10 |
|---|---|---|---|---|---|---|---|---|---|----|

excellent

**symptoms that occurred in the clinic:**       no       yes

- |                                                        |                                            |
|--------------------------------------------------------|--------------------------------------------|
| <input type="checkbox"/> headache                      | <input type="checkbox"/> muscle pains      |
| <input type="checkbox"/> sleep disturbances            | <input type="checkbox"/> heartburn         |
| <input type="checkbox"/> bad breath<br>(ask the nurse) | <input type="checkbox"/> nausea            |
| <input type="checkbox"/> tiredness                     | <input type="checkbox"/> dry mouth         |
| <input type="checkbox"/> back pain                     | <input type="checkbox"/> cramp in the calf |
| <input type="checkbox"/> sensitivity to cold           | <input type="checkbox"/> diarrhea          |
| <input type="checkbox"/> vertigo                       | <input type="checkbox"/> restless legs     |
| <input type="checkbox"/> hunger                        | <input type="checkbox"/> obstipation       |
| <input type="checkbox"/> skin rash                     | <input type="checkbox"/> palpitations      |
| <input type="checkbox"/> abdominal bloating            | <input type="checkbox"/> blurred vision    |
| <input type="checkbox"/> others: _____                 | <input type="checkbox"/> cravings          |

| <b>Today...</b>                                               | At no time | Some of the time | Less than half of the time | More than half of the time | Most of the time | All of the time |
|---------------------------------------------------------------|------------|------------------|----------------------------|----------------------------|------------------|-----------------|
| ...I have felt cheerful and in good spirits                   | 0          | 1                | 2                          | 3                          | 4                | 5               |
| ...I have felt calm and relaxed                               | 0          | 1                | 2                          | 3                          | 4                | 5               |
| ...I have felt active and vigorous                            | 0          | 1                | 2                          | 3                          | 4                | 5               |
| ...I woke up feeling fresh and rested                         | 0          | 1                | 2                          | 3                          | 4                | 5               |
| ...my daily life has been filled with things that interest me | 0          | 1                | 2                          | 3                          | 4                | 5               |

## Day 21: \_\_\_\_\_

ketone bodies (mg/dl):  0  5  15  40  80  160

- diet:**  800 kcal  1.200 kcal  1.800 kcal  
supplements:  none  fish  
 others: \_\_\_\_\_
- digestive rest day:**  rice  potato/vegetables  
 fruit  others: \_\_\_\_\_
- fasting:** honey  no  yes  
noon: juice (¼ l)  no  yes  
vegetable soup (¼ l)  no  yes  
evening: vegetable soup (¼ l)  no  yes  
supplements:  none  Kousmine  Kousmine vegan  
 yoghurt  oatmeal soup  
 rice soup  carrot juice  
 green tea  black tea  
 others: \_\_\_\_\_
- day of breaking the fast**
- building up day:**  1  2  3  4

### physical well-being:

very bad

|   |   |   |   |   |   |   |   |   |   |    |
|---|---|---|---|---|---|---|---|---|---|----|
| 0 | 1 | 2 | 3 | 4 | 5 | 6 | 7 | 8 | 9 | 10 |
|---|---|---|---|---|---|---|---|---|---|----|

excellent

### emotional well-being:

very bad

|   |   |   |   |   |   |   |   |   |   |    |
|---|---|---|---|---|---|---|---|---|---|----|
| 0 | 1 | 2 | 3 | 4 | 5 | 6 | 7 | 8 | 9 | 10 |
|---|---|---|---|---|---|---|---|---|---|----|

excellent



**symptoms that occurred in the clinic:**       no       yes

- |                                                        |                                            |
|--------------------------------------------------------|--------------------------------------------|
| <input type="checkbox"/> headache                      | <input type="checkbox"/> muscle pains      |
| <input type="checkbox"/> sleep disturbances            | <input type="checkbox"/> heartburn         |
| <input type="checkbox"/> bad breath<br>(ask the nurse) | <input type="checkbox"/> nausea            |
| <input type="checkbox"/> tiredness                     | <input type="checkbox"/> dry mouth         |
| <input type="checkbox"/> back pain                     | <input type="checkbox"/> cramp in the calf |
| <input type="checkbox"/> sensitivity to cold           | <input type="checkbox"/> diarrhea          |
| <input type="checkbox"/> vertigo                       | <input type="checkbox"/> restless legs     |
| <input type="checkbox"/> hunger                        | <input type="checkbox"/> obstipation       |
| <input type="checkbox"/> skin rash                     | <input type="checkbox"/> palpitations      |
| <input type="checkbox"/> abdominal bloating            | <input type="checkbox"/> blurred vision    |
| <input type="checkbox"/> others: _____                 | <input type="checkbox"/> cravings          |

| <b>Today...</b>                                               | At no time | Some of the time | Less than half of the time | More than half of the time | Most of the time | All of the time |
|---------------------------------------------------------------|------------|------------------|----------------------------|----------------------------|------------------|-----------------|
| ...I have felt cheerful and in good spirits                   | 0          | 1                | 2                          | 3                          | 4                | 5               |
| ...I have felt calm and relaxed                               | 0          | 1                | 2                          | 3                          | 4                | 5               |
| ...I have felt active and vigorous                            | 0          | 1                | 2                          | 3                          | 4                | 5               |
| ...I woke up feeling fresh and rested                         | 0          | 1                | 2                          | 3                          | 4                | 5               |
| ...my daily life has been filled with things that interest me | 0          | 1                | 2                          | 3                          | 4                | 5               |

## Day 22: \_\_\_\_\_

ketone bodies (mg/dl):  0  5  15  40  80  160

- diet:**  800 kcal  1.200 kcal  1.800 kcal  
supplements:  none  fish  
 others: \_\_\_\_\_
- digestive rest day:**  rice  potato/vegetables  
 fruit  others: \_\_\_\_\_
- fasting:** honey  no  yes  
noon: juice (¼ l)  no  yes  
vegetable soup (¼ l)  no  yes  
evening: vegetable soup (¼ l)  no  yes  
supplements:  none  Kousmine  Kousmine vegan  
 yoghurt  oatmeal soup  
 rice soup  carrot juice  
 green tea  black tea  
 others: \_\_\_\_\_
- day of breaking the fast**
- building up day:**  1  2  3  4

### physical well-being:

very bad

|   |   |   |   |   |   |   |   |   |   |    |
|---|---|---|---|---|---|---|---|---|---|----|
| 0 | 1 | 2 | 3 | 4 | 5 | 6 | 7 | 8 | 9 | 10 |
|---|---|---|---|---|---|---|---|---|---|----|

excellent

### emotional well-being:

very bad

|   |   |   |   |   |   |   |   |   |   |    |
|---|---|---|---|---|---|---|---|---|---|----|
| 0 | 1 | 2 | 3 | 4 | 5 | 6 | 7 | 8 | 9 | 10 |
|---|---|---|---|---|---|---|---|---|---|----|

excellent

**symptoms that occurred in the clinic:**       no       yes

- |                                                        |                                            |
|--------------------------------------------------------|--------------------------------------------|
| <input type="checkbox"/> headache                      | <input type="checkbox"/> muscle pains      |
| <input type="checkbox"/> sleep disturbances            | <input type="checkbox"/> heartburn         |
| <input type="checkbox"/> bad breath<br>(ask the nurse) | <input type="checkbox"/> nausea            |
| <input type="checkbox"/> tiredness                     | <input type="checkbox"/> dry mouth         |
| <input type="checkbox"/> back pain                     | <input type="checkbox"/> cramp in the calf |
| <input type="checkbox"/> sensitivity to cold           | <input type="checkbox"/> diarrhea          |
| <input type="checkbox"/> vertigo                       | <input type="checkbox"/> restless legs     |
| <input type="checkbox"/> hunger                        | <input type="checkbox"/> obstipation       |
| <input type="checkbox"/> skin rash                     | <input type="checkbox"/> palpitations      |
| <input type="checkbox"/> abdominal bloating            | <input type="checkbox"/> blurred vision    |
| <input type="checkbox"/> others: _____                 | <input type="checkbox"/> cravings          |

| <b>Today...</b>                                               | At no time | Some of the time | Less than half of the time | More than half of the time | Most of the time | All of the time |
|---------------------------------------------------------------|------------|------------------|----------------------------|----------------------------|------------------|-----------------|
| ...I have felt cheerful and in good spirits                   | 0          | 1                | 2                          | 3                          | 4                | 5               |
| ...I have felt calm and relaxed                               | 0          | 1                | 2                          | 3                          | 4                | 5               |
| ...I have felt active and vigorous                            | 0          | 1                | 2                          | 3                          | 4                | 5               |
| ...I woke up feeling fresh and rested                         | 0          | 1                | 2                          | 3                          | 4                | 5               |
| ...my daily life has been filled with things that interest me | 0          | 1                | 2                          | 3                          | 4                | 5               |

## Questions at the end of your stay

- 1) Did you have a major health problem at the beginning of your stay?

no

yes, which one? \_\_\_\_\_

---

How did your major health problem evolve during your stay?

much worse

|   |   |   |   |   |   |   |
|---|---|---|---|---|---|---|
| 1 | 2 | 3 | 4 | 5 | 6 | 7 |
|---|---|---|---|---|---|---|

much better

- 2) During your stay you underwent a diet or a fasting therapy. How would you evaluate it:

it was a  
nightmare

|   |   |   |   |   |   |   |
|---|---|---|---|---|---|---|
| 1 | 2 | 3 | 4 | 5 | 6 | 7 |
|---|---|---|---|---|---|---|

a fantastic  
experience

- 3) If you compare your stay with a usual holiday, Buchinger Wilhelmi had:

a less  
relaxing effect

the same  
relaxing effect

a more  
relaxing effect

- 4) The length of your stay was:

too short

just right

too long

- 5) In case you fasted, would you have wished to extend the length of your fast on the last day of fasting?

no

yes

# Lifestyle – during the stay

stress/relaxation level:

extreme  
tension

|   |   |   |   |   |   |   |   |   |   |    |
|---|---|---|---|---|---|---|---|---|---|----|
| 0 | 1 | 2 | 3 | 4 | 5 | 6 | 7 | 8 | 9 | 10 |
|---|---|---|---|---|---|---|---|---|---|----|

total  
relaxation

**nicotine:**  none  cigarettes/day: 

|  |  |
|--|--|
|  |  |
|--|--|

none  cigars/day: 

|  |  |
|--|--|
|  |  |
|--|--|

**alcohol:**  none  beer: glasses (0,5 l)/week: 

|  |  |
|--|--|
|  |  |
|--|--|

none  wine: glasses (0,25 l)/week: 

|  |  |
|--|--|
|  |  |
|--|--|

none  spirits: glasses (2 cl)/week: 

|  |  |
|--|--|
|  |  |
|--|--|

**coffee:**  none  cups/day: 

|  |  |
|--|--|
|  |  |
|--|--|

**media:**  none  Smartphone (h/week): 

|  |  |
|--|--|
|  |  |
|--|--|

none  TV (h/week): 

|  |  |
|--|--|
|  |  |
|--|--|

none  PC (h/week): 

|  |  |
|--|--|
|  |  |
|--|--|

**exercise:**  none  yes: h/week: 

|  |  |
|--|--|
|  |  |
|--|--|

, 

|  |
|--|
|  |
|--|

Over the last  
weeks...

|                                                               | At no time | Some of the time | Less than half of the time | More than half of the time | Most of the time | All of the time |
|---------------------------------------------------------------|------------|------------------|----------------------------|----------------------------|------------------|-----------------|
| ...I have felt cheerful and in good spirits                   | 0          | 1                | 2                          | 3                          | 4                | 5               |
| ...I have felt calm and relaxed                               | 0          | 1                | 2                          | 3                          | 4                | 5               |
| ...I have felt active and vigorous                            | 0          | 1                | 2                          | 3                          | 4                | 5               |
| ...I woke up feeling fresh and rested                         | 0          | 1                | 2                          | 3                          | 4                | 5               |
| ...my daily life has been filled with things that interest me | 0          | 1                | 2                          | 3                          | 4                | 5               |

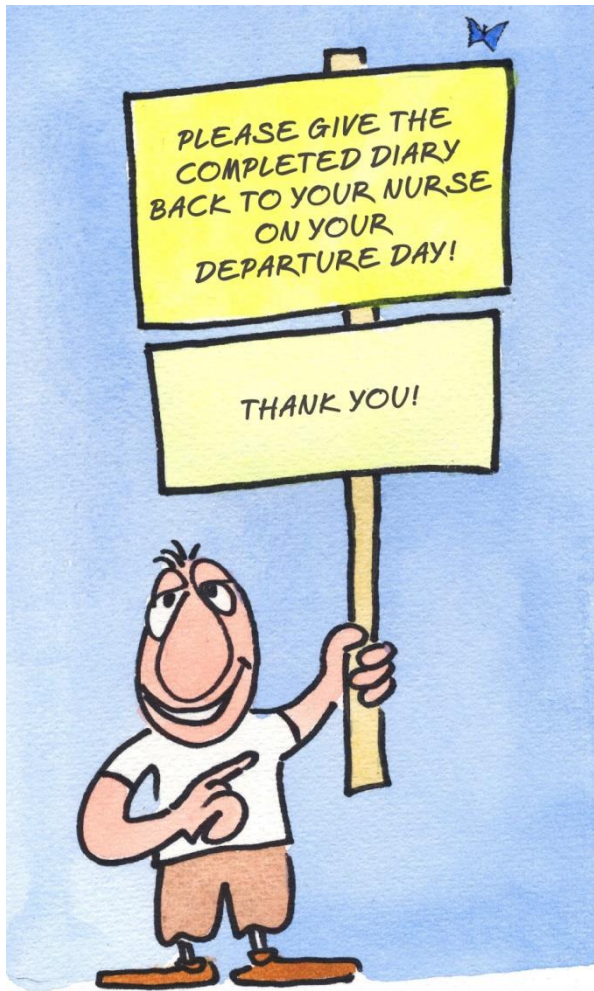

**The following questions are not indispensable for our scientific data collection but help Buchinger Wilhelmi to better target your needs:**

Was the filling of this diary acceptable for you?

Do you have any suggestions for improvement?

Did your stay at Buchinger Wilhelmi fulfill your expectations?

To which extent will the stay influence your life?

Do you need help from our service “Feel well after Buchinger  
Wilhelmi”? A nutritionist could assist you at home.

E-Mail: [nutrition@buchinger-wilhelmi.com](mailto:nutrition@buchinger-wilhelmi.com)

Thank you very much and see you soon!

We will write an email to you after two weeks, three and  
eleven months and hope to find you well.

Have a good trip back home!

Follow up Buchinger Wilhelmi
