# Supplementary material for: Safety, health improvement and well-being during a 4 to 21-day fasting period in an observational study including 1422 subjects
Source: PubMed Central journal article supplement (PMC6314618; doi:10.1371/journal.pone.0209353), 2019-01-02
Supplement: pone.0209353.s023.pdf [file pone.0209353.s023.pdf]

# S6 Text. Questionnaires in French.

Journal

d'évaluation personnelle

Nom : \_\_\_\_\_

Numéro de votre chambre : \_\_\_\_\_

Séjour de : \_\_\_\_\_ jusqu'à : \_\_\_\_\_

Chers hôtes,  
chère patiente, cher patient,

Le changement de métabolisme qui se produit lors d'un jeûne thérapeutique ou d'un régime basse-calorie a un impact sur le bien-être. Lorsque vous remplirez le questionnaire quotidien, vous pourrez prendre conscience des changements qui s'opèrent en vous. L'attention portée à votre propre état de bien-être vous sera utile au quotidien.

Pour pouvoir évaluer votre évolution, les données que vous voudrez bien recueillir quotidiennement doivent être complètes.

Pensez aussi à répondre aux questions concernant :

1. votre style de vie avant le séjour (p 7)
2. votre style de vie pendant la durée de votre séjour (p 53)
3. questions à la fin du séjour (p 52)

Un grand merci de remplir tous les questionnaires en détail.

Merci également de retourner le « journal d'évaluation personnelle » à votre infirmière le jour de votre départ.

Merci enfin pour votre aimable participation !

Dr Françoise Wilhelmi de Toledo et  
l'équipe scientifique Buchinger Wilhelmi

## Instructions :

➤ Date :

Nous vous prions de noter la date. Le jour 1 correspond au jour d'arrivée.

➤ Régime :

Chaque jour vous documenterez votre forme d'alimentation (régime, repos digestif, jeûne, interruption du jeûne, jour de réalimentation) et leurs annexes (par exemple jeûne avec miel, jus et bouillon). Si vous ne recevez pas de supplément additionnel cochez « non ». Sinon cochez les suppléments correspondants.

➤ Corps cétoniques :

Mesurez les corps cétoniques à l'aide d'un stick dans la première urine du matin et documentez le résultat dans la case appropriée. Vous ne pouvez indiquer seule qu'une valeur par jour.

➤ Votre état de santé physique/émotionnelle :

Évaluez votre état de santé émotionnelle et physique sur une échelle visuelle allant de 0 à 10 intuitivement. Il s'agit là d'une évaluation subjective.

➤ Symptômes :

Si vous n'avez observé aucun symptôme, veuillez cocher la case « non ». Si vous avez observé un ou plusieurs symptômes, cochez « oui » et la/les case(s) correspondante(s).

➤ Bien-être quotidien :

Évaluez votre bien-être de 0 à 5 en fonction de fréquence à laquelle vous avez ressenti ce bien-être.

Exemple : Lundi, 18.01.16

Corps cétoniques (mg/dl):  0  5  15  40  80  160

Régime :  800 kcal  1.200 kcal  1.800 kcal

Suppléments :  non  poisson

autre : \_\_\_\_\_

Jour de repos  riz  pommes de terre/légumes

digestif :  fruits  autre: \_\_\_\_\_

Jeûne : miel  non  oui

midi : jus (¼l)  non  oui

bouillon (¼l)  non  oui

soir : bouillon (¼l)  non  oui

suppléments:  non  Kousmine  Kousmine vegan

yoghourt  décoction d'avoine

décoction de riz  jus de carotte

thé vert  thé noir

autre : \_\_\_\_\_

Rupture du jeûne

Jour de réalimentation :  1  2  3  4

Votre état de santé physique :

très mauvais

|   |   |                                     |   |   |   |   |   |   |   |    |
|---|---|-------------------------------------|---|---|---|---|---|---|---|----|
| 0 | 1 | <input checked="" type="checkbox"/> | 3 | 4 | 5 | 6 | 7 | 8 | 9 | 10 |
|---|---|-------------------------------------|---|---|---|---|---|---|---|----|

excellent

Votre état de santé émotionnelle :

très mauvais

|   |   |   |   |   |   |   |   |                                     |   |    |
|---|---|---|---|---|---|---|---|-------------------------------------|---|----|
| 0 | 1 | 2 | 3 | 4 | 5 | 6 | 7 | <input checked="" type="checkbox"/> | 9 | 10 |
|---|---|---|---|---|---|---|---|-------------------------------------|---|----|

excellent

Symptômes depuis l'arrivée à la clinique:  non  oui

- |                                                                       |                                               |
|-----------------------------------------------------------------------|-----------------------------------------------|
| <input type="checkbox"/> maux de tête                                 | <input type="checkbox"/> douleurs musculaires |
| <input type="checkbox"/> trouble du sommeil                           | <input type="checkbox"/> brûlures d'estomac   |
| <input type="checkbox"/> haleine chargée<br>(demandez à l'infirmière) | <input type="checkbox"/> nausée               |
| <input type="checkbox"/> fatigue                                      | <input type="checkbox"/> bouche sèche         |
| <input type="checkbox"/> mal de dos                                   | <input type="checkbox"/> crampe au mollet     |
| <input type="checkbox"/> frilosité                                    | <input type="checkbox"/> diarrhée             |
| <input type="checkbox"/> vertige                                      | <input type="checkbox"/> jambes sans repos    |
| <input type="checkbox"/> faim                                         | <input type="checkbox"/> constipation         |
| <input type="checkbox"/> éruption cutanée                             | <input type="checkbox"/> palpitations         |
| <input type="checkbox"/> ballonnements                                | <input type="checkbox"/> troubles de la vue   |
| <input type="checkbox"/> autres: _____                                | <input type="checkbox"/> envie de manger      |

Aujourd'hui ...

|                                                                 | jamais       | de temps en temps | moins de la moitié du temps | plus de la moitié du temps | la plupart du temps | tout le temps |
|-----------------------------------------------------------------|--------------|-------------------|-----------------------------|----------------------------|---------------------|---------------|
| ...je me suis senti(e) bien et de bonne humeur                  | 0            | 1                 | 2                           | 3                          | <del>4</del>        | 5             |
| ...je me suis senti(e) calme et tranquille                      | 0            | 1                 | <del>2</del>                | 3                          | 4                   | 5             |
| ...je me suis senti(e) plein(e) d'énergie et vigoureux(se)      | 0            | 1                 | 2                           | 3                          | 4                   | <del>5</del>  |
| ...je me suis réveillé(e) en me sentant frais(che) et dispos(e) | <del>0</del> | 1                 | 2                           | 3                          | 4                   | 5             |
| ...ma vie quotidienne a été remplie de choses intéressantes     | 0            | 1                 | 2                           | 3                          | <del>4</del>        | 5             |

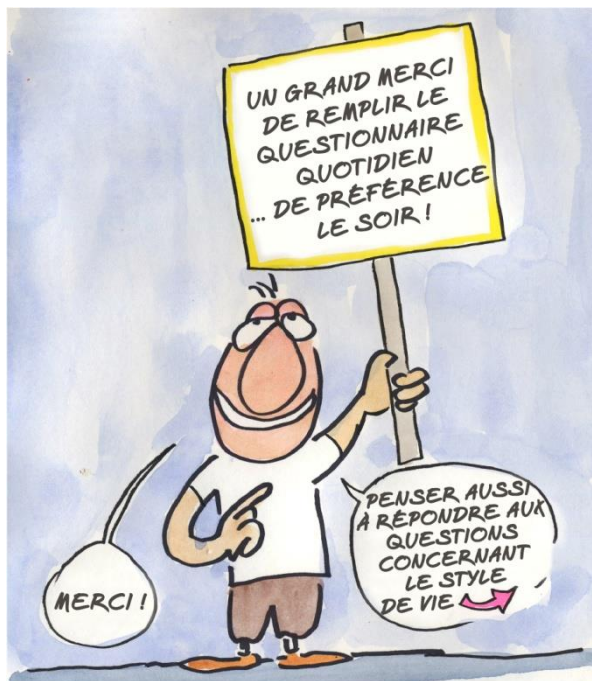

# Style de vie – avant le séjour

Niveau de stress/relaxation :

état de tension  
extrême

|   |   |   |   |   |   |   |   |   |   |    |
|---|---|---|---|---|---|---|---|---|---|----|
| 0 | 1 | 2 | 3 | 4 | 5 | 6 | 7 | 8 | 9 | 10 |
|---|---|---|---|---|---|---|---|---|---|----|

totalem  
relaxé

**Nicotine :**  non  cigarettes/jour:

non  cigares/jour:

**Alcool :**  non  bière : verre (0,5 l)/semaine:

non  vin : verre (0,25 l)/semaine:

non  alcool fort : verre (2 cl)/semaine:

**Café :**  non  tasse/jour:

**Médias :**  non  smart-phone (h/semaine):

non  télévision (h/semaine):

non  ordinateur (h/semaine):

**Exercice physique :**  non  oui : h/semaine:   ,

**Au cours des deux  
dernières semaines  
avant mon arrivée ...**

|                                                                    | jamais | de temps en temps | moins de la moitié<br>du temps | plus de la moitié<br>du temps | la plupart du<br>temps | tout le temps |
|--------------------------------------------------------------------|--------|-------------------|--------------------------------|-------------------------------|------------------------|---------------|
| ...je me suis senti(e) bien et de<br>bonne humeur                  | 0      | 1                 | 2                              | 3                             | 4                      | 5             |
| ...je me suis senti(e) calme et<br>tranquille                      | 0      | 1                 | 2                              | 3                             | 4                      | 5             |
| ...je me suis senti(e) plein(e)<br>d'énergie et vigoureux(se)      | 0      | 1                 | 2                              | 3                             | 4                      | 5             |
| ...je me suis réveillé(e) en me<br>sentant frais(che) et dispos(e) | 0      | 1                 | 2                              | 3                             | 4                      | 5             |
| ... ma vie quotidienne a été remplie<br>de choses intéressantes    | 0      | 1                 | 2                              | 3                             | 4                      | 5             |

1. jour (jour d'arrivée): \_\_\_\_\_

Corps cétoniques (mg/dl):  0  5  15  40  80  160

- Régime :  800 kcal  1.200 kcal  1.800 kcal  
suppléments :  non  poisson  
 autre : \_\_\_\_\_
- Jour de repos digestif :  riz  pommes de terre/légumes  
 fruits  autre : \_\_\_\_\_
- Jeûne : miel  non  oui  
midi : jus (¼l)  non  oui  
bouillon (¼l)  non  oui  
soir : bouillon (¼l)  non  oui  
suppléments:  non  Kousmine  Kousmine vegan  
 yoghourt  décoction d'avoine  
 décoction de riz  jus de carotte  
 thé vert  thé noir  
 autre : \_\_\_\_\_
- Rupture du jeûne
- Jour de réalimentation :  1  2  3  4

Votre état de santé physique :

très mauvais 

|   |   |   |   |   |   |   |   |   |   |    |
|---|---|---|---|---|---|---|---|---|---|----|
| 0 | 1 | 2 | 3 | 4 | 5 | 6 | 7 | 8 | 9 | 10 |
|---|---|---|---|---|---|---|---|---|---|----|

 excellent

Votre état de santé émotionnelle :

très mauvais 

|   |   |   |   |   |   |   |   |   |   |    |
|---|---|---|---|---|---|---|---|---|---|----|
| 0 | 1 | 2 | 3 | 4 | 5 | 6 | 7 | 8 | 9 | 10 |
|---|---|---|---|---|---|---|---|---|---|----|

 excellent



**Symptômes depuis l'arrivée à la clinique:**  non  oui

- |                                                                       |                                               |
|-----------------------------------------------------------------------|-----------------------------------------------|
| <input type="checkbox"/> maux de tête                                 | <input type="checkbox"/> douleurs musculaires |
| <input type="checkbox"/> trouble du sommeil                           | <input type="checkbox"/> brûlures d'estomac   |
| <input type="checkbox"/> haleine chargée<br>(demandez à l'infirmière) | <input type="checkbox"/> nausée               |
| <input type="checkbox"/> fatigue                                      | <input type="checkbox"/> bouche sèche         |
| <input type="checkbox"/> mal de dos                                   | <input type="checkbox"/> crampe au mollet     |
| <input type="checkbox"/> frilosité                                    | <input type="checkbox"/> diarrhée             |
| <input type="checkbox"/> vertige                                      | <input type="checkbox"/> jambes sans repos    |
| <input type="checkbox"/> faim                                         | <input type="checkbox"/> constipation         |
| <input type="checkbox"/> éruption cutanée                             | <input type="checkbox"/> palpitations         |
| <input type="checkbox"/> ballonnements                                | <input type="checkbox"/> troubles de la vue   |
| <input type="checkbox"/> autres: _____                                | <input type="checkbox"/> envie de manger      |

**Aujourd'hui ...**

|                                                                 | jamais | de temps en temps | moins de la moitié du temps | plus de la moitié du temps | la plupart du temps | tout le temps |
|-----------------------------------------------------------------|--------|-------------------|-----------------------------|----------------------------|---------------------|---------------|
| ...je me suis senti(e) bien et de bonne humeur                  | 0      | 1                 | 2                           | 3                          | 4                   | 5             |
| ...je me suis senti(e) calme et tranquille                      | 0      | 1                 | 2                           | 3                          | 4                   | 5             |
| ...je me suis senti(e) plein(e) d'énergie et vigoureux(se)      | 0      | 1                 | 2                           | 3                          | 4                   | 5             |
| ...je me suis réveillé(e) en me sentant frais(che) et dispos(e) | 0      | 1                 | 2                           | 3                          | 4                   | 5             |
| ...ma vie quotidienne a été remplie de choses intéressantes     | 0      | 1                 | 2                           | 3                          | 4                   | 5             |

2. jour : \_\_\_\_\_

Corps cétoniques (mg/dl):     0     5     15     40     80     160

Régime :     800 kcal     1.200 kcal     1.800 kcal

suppléments :     non     poisson

autre : \_\_\_\_\_

Jour de repos     riz     pommes de terre/légumes

digestif :     fruits     autre : \_\_\_\_\_

Jeûne :    miel     non     oui

midi :    jus (¼l)     non     oui

          bouillon (¼l)     non     oui

soir :    bouillon (¼l)     non     oui

suppléments:     non     Kousmine     Kousmine vegan

yoghourt     décoction d'avoine

décoction de riz     jus de carotte

thé vert     thé noir

autre : \_\_\_\_\_

Rupture du jeûne

Jour de réalimentation :     1     2     3     4

Votre état de santé physique :

très mauvais

|   |   |   |   |   |   |   |   |   |   |    |
|---|---|---|---|---|---|---|---|---|---|----|
| 0 | 1 | 2 | 3 | 4 | 5 | 6 | 7 | 8 | 9 | 10 |
|---|---|---|---|---|---|---|---|---|---|----|

excellent

Votre état de santé émotionnelle :

très mauvais

|   |   |   |   |   |   |   |   |   |   |    |
|---|---|---|---|---|---|---|---|---|---|----|
| 0 | 1 | 2 | 3 | 4 | 5 | 6 | 7 | 8 | 9 | 10 |
|---|---|---|---|---|---|---|---|---|---|----|

excellent

**Symptômes depuis l'arrivée à la clinique:** non  oui

- |                                                                       |                                               |
|-----------------------------------------------------------------------|-----------------------------------------------|
| <input type="checkbox"/> maux de tête                                 | <input type="checkbox"/> douleurs musculaires |
| <input type="checkbox"/> trouble du sommeil                           | <input type="checkbox"/> brûlures d'estomac   |
| <input type="checkbox"/> haleine chargée<br>(demandez à l'infirmière) | <input type="checkbox"/> nausée               |
| <input type="checkbox"/> fatigue                                      | <input type="checkbox"/> bouche sèche         |
| <input type="checkbox"/> mal de dos                                   | <input type="checkbox"/> crampe au mollet     |
| <input type="checkbox"/> frilosité                                    | <input type="checkbox"/> diarrhée             |
| <input type="checkbox"/> vertige                                      | <input type="checkbox"/> jambes sans repos    |
| <input type="checkbox"/> faim                                         | <input type="checkbox"/> constipation         |
| <input type="checkbox"/> éruption cutanée                             | <input type="checkbox"/> palpitations         |
| <input type="checkbox"/> ballonnements                                | <input type="checkbox"/> troubles de la vue   |
| <input type="checkbox"/> autres: _____                                | <input type="checkbox"/> envie de manger      |

**Aujourd'hui ...**

|                                                                 | jamais | de temps en temps | moins de la moitié du temps | plus de la moitié du temps | la plupart du temps | tout le temps |
|-----------------------------------------------------------------|--------|-------------------|-----------------------------|----------------------------|---------------------|---------------|
| ...je me suis senti(e) bien et de bonne humeur                  | 0      | 1                 | 2                           | 3                          | 4                   | 5             |
| ...je me suis senti(e) calme et tranquille                      | 0      | 1                 | 2                           | 3                          | 4                   | 5             |
| ...je me suis senti(e) plein(e) d'énergie et vigoureux(se)      | 0      | 1                 | 2                           | 3                          | 4                   | 5             |
| ...je me suis réveillé(e) en me sentant frais(che) et dispos(e) | 0      | 1                 | 2                           | 3                          | 4                   | 5             |
| ...ma vie quotidienne a été remplie de choses intéressantes     | 0      | 1                 | 2                           | 3                          | 4                   | 5             |

3. jour : \_\_\_\_\_

Corps cétoniques (mg/dl):     0    5    15    40    80    160

Régime :     800 kcal     1.200 kcal     1.800 kcal

suppléments :     non     poisson

autre : \_\_\_\_\_

Jour de repos     riz     pommes de terre/légumes

digestif :     fruits     autre : \_\_\_\_\_

Jeûne :    miel     non     oui

midi :    jus (¼l)     non     oui

          bouillon (¼l)     non     oui

soir :    bouillon (¼l)     non     oui

suppléments:     non     Kousmine     Kousmine vegan

yoghourt     décoction d'avoine

décoction de riz     jus de carotte

thé vert     thé noir

autre : \_\_\_\_\_

Rupture du jeûne

Jour de réalimentation :     1     2     3     4

Votre état de santé physique :

très mauvais

|   |   |   |   |   |   |   |   |   |   |    |
|---|---|---|---|---|---|---|---|---|---|----|
| 0 | 1 | 2 | 3 | 4 | 5 | 6 | 7 | 8 | 9 | 10 |
|---|---|---|---|---|---|---|---|---|---|----|

excellent

Votre état de santé émotionnelle :

très mauvais

|   |   |   |   |   |   |   |   |   |   |    |
|---|---|---|---|---|---|---|---|---|---|----|
| 0 | 1 | 2 | 3 | 4 | 5 | 6 | 7 | 8 | 9 | 10 |
|---|---|---|---|---|---|---|---|---|---|----|

excellent

**Symptômes depuis l'arrivée à la clinique:**  non  oui

- |                                                                       |                                               |
|-----------------------------------------------------------------------|-----------------------------------------------|
| <input type="checkbox"/> maux de tête                                 | <input type="checkbox"/> douleurs musculaires |
| <input type="checkbox"/> trouble du sommeil                           | <input type="checkbox"/> brûlures d'estomac   |
| <input type="checkbox"/> haleine chargée<br>(demandez à l'infirmière) | <input type="checkbox"/> nausée               |
| <input type="checkbox"/> fatigue                                      | <input type="checkbox"/> bouche sèche         |
| <input type="checkbox"/> mal de dos                                   | <input type="checkbox"/> crampe au mollet     |
| <input type="checkbox"/> frilosité                                    | <input type="checkbox"/> diarrhée             |
| <input type="checkbox"/> vertige                                      | <input type="checkbox"/> jambes sans repos    |
| <input type="checkbox"/> faim                                         | <input type="checkbox"/> constipation         |
| <input type="checkbox"/> éruption cutanée                             | <input type="checkbox"/> palpitations         |
| <input type="checkbox"/> ballonnements                                | <input type="checkbox"/> troubles de la vue   |
| <input type="checkbox"/> autres: _____                                | <input type="checkbox"/> envie de manger      |

**Aujourd'hui ...**

|                                                                 | jamais | de temps en temps | moins de la moitié du temps | plus de la moitié du temps | la plupart du temps | tout le temps |
|-----------------------------------------------------------------|--------|-------------------|-----------------------------|----------------------------|---------------------|---------------|
| ...je me suis senti(e) bien et de bonne humeur                  | 0      | 1                 | 2                           | 3                          | 4                   | 5             |
| ...je me suis senti(e) calme et tranquille                      | 0      | 1                 | 2                           | 3                          | 4                   | 5             |
| ...je me suis senti(e) plein(e) d'énergie et vigoureux(se)      | 0      | 1                 | 2                           | 3                          | 4                   | 5             |
| ...je me suis réveillé(e) en me sentant frais(che) et dispos(e) | 0      | 1                 | 2                           | 3                          | 4                   | 5             |
| ...ma vie quotidienne a été remplie de choses intéressantes     | 0      | 1                 | 2                           | 3                          | 4                   | 5             |

4. jour : \_\_\_\_\_

Corps cétoniques (mg/dl):     0    5    15    40    80    160

Régime :     800 kcal     1.200 kcal     1.800 kcal

suppléments :     non     poisson

autre : \_\_\_\_\_

Jour de repos     riz     pommes de terre/légumes

digestif :     fruits     autre : \_\_\_\_\_

Jeûne :    miel     non     oui

midi :    jus (¼l)     non     oui

          bouillon (¼l)     non     oui

soir :    bouillon (¼l)     non     oui

suppléments:     non     Kousmine     Kousmine vegan  
                           yoghourt     décoction d'avoine  
                           décoction de riz     jus de carotte  
                           thé vert     thé noir  
                           autre : \_\_\_\_\_

Rupture du jeûne

Jour de réalimentation :     1     2     3     4

Votre état de santé physique :

très mauvais

|   |   |   |   |   |   |   |   |   |   |    |
|---|---|---|---|---|---|---|---|---|---|----|
| 0 | 1 | 2 | 3 | 4 | 5 | 6 | 7 | 8 | 9 | 10 |
|---|---|---|---|---|---|---|---|---|---|----|

excellent

Votre état de santé émotionnelle :

très mauvais

|   |   |   |   |   |   |   |   |   |   |    |
|---|---|---|---|---|---|---|---|---|---|----|
| 0 | 1 | 2 | 3 | 4 | 5 | 6 | 7 | 8 | 9 | 10 |
|---|---|---|---|---|---|---|---|---|---|----|

excellent

**Symptômes depuis l'arrivée à la clinique:**       non     oui

- |                                                                       |                                               |
|-----------------------------------------------------------------------|-----------------------------------------------|
| <input type="checkbox"/> maux de tête                                 | <input type="checkbox"/> douleurs musculaires |
| <input type="checkbox"/> trouble du sommeil                           | <input type="checkbox"/> brûlures d'estomac   |
| <input type="checkbox"/> haleine chargée<br>(demandez à l'infirmière) | <input type="checkbox"/> nausée               |
| <input type="checkbox"/> fatigue                                      | <input type="checkbox"/> bouche sèche         |
| <input type="checkbox"/> mal de dos                                   | <input type="checkbox"/> crampe au mollet     |
| <input type="checkbox"/> frilosité                                    | <input type="checkbox"/> diarrhée             |
| <input type="checkbox"/> vertige                                      | <input type="checkbox"/> jambes sans repos    |
| <input type="checkbox"/> faim                                         | <input type="checkbox"/> constipation         |
| <input type="checkbox"/> éruption cutanée                             | <input type="checkbox"/> palpitations         |
| <input type="checkbox"/> ballonnements                                | <input type="checkbox"/> troubles de la vue   |
| <input type="checkbox"/> autres: _____                                | <input type="checkbox"/> envie de manger      |

**Aujourd'hui ...**

|                                                                 | jamais | de temps en temps | moins de la moitié du temps | plus de la moitié du temps | la plupart du temps | tout le temps |
|-----------------------------------------------------------------|--------|-------------------|-----------------------------|----------------------------|---------------------|---------------|
| ...je me suis senti(e) bien et de bonne humeur                  | 0      | 1                 | 2                           | 3                          | 4                   | 5             |
| ...je me suis senti(e) calme et tranquille                      | 0      | 1                 | 2                           | 3                          | 4                   | 5             |
| ...je me suis senti(e) plein(e) d'énergie et vigoureux(se)      | 0      | 1                 | 2                           | 3                          | 4                   | 5             |
| ...je me suis réveillé(e) en me sentant frais(che) et dispos(e) | 0      | 1                 | 2                           | 3                          | 4                   | 5             |
| ...ma vie quotidienne a été remplie de choses intéressantes     | 0      | 1                 | 2                           | 3                          | 4                   | 5             |

5. jour : \_\_\_\_\_

Corps cétoniques (mg/dl):     0     5     15     40     80     160

Régime :     800 kcal     1.200 kcal     1.800 kcal

suppléments :     non     poisson

autre : \_\_\_\_\_

Jour de repos digestif :     riz     pommes de terre/légumes  
 fruits     autre : \_\_\_\_\_

Jeûne :    miel     non     oui

    midi :    jus (¼l)     non     oui

            bouillon (¼l)     non     oui

    soir :    bouillon (¼l)     non     oui

suppléments:     non     Kousmine     Kousmine vegan  
                     yoghourt     décoction d'avoine  
                     décoction de riz     jus de carotte  
                     thé vert     thé noir  
 autre : \_\_\_\_\_

Rupture du jeûne

Jour de réalimentation :     1     2     3     4

Votre état de santé physique :

très mauvais

|   |   |   |   |   |   |   |   |   |   |    |
|---|---|---|---|---|---|---|---|---|---|----|
| 0 | 1 | 2 | 3 | 4 | 5 | 6 | 7 | 8 | 9 | 10 |
|---|---|---|---|---|---|---|---|---|---|----|

excellent

Votre état de santé émotionnelle :

très mauvais

|   |   |   |   |   |   |   |   |   |   |    |
|---|---|---|---|---|---|---|---|---|---|----|
| 0 | 1 | 2 | 3 | 4 | 5 | 6 | 7 | 8 | 9 | 10 |
|---|---|---|---|---|---|---|---|---|---|----|

excellent



**Symptômes depuis l'arrivée à la clinique:** non  oui

- |                                                                       |                                               |
|-----------------------------------------------------------------------|-----------------------------------------------|
| <input type="checkbox"/> maux de tête                                 | <input type="checkbox"/> douleurs musculaires |
| <input type="checkbox"/> trouble du sommeil                           | <input type="checkbox"/> brûlures d'estomac   |
| <input type="checkbox"/> haleine chargée<br>(demandez à l'infirmière) | <input type="checkbox"/> nausée               |
| <input type="checkbox"/> fatigue                                      | <input type="checkbox"/> bouche sèche         |
| <input type="checkbox"/> mal de dos                                   | <input type="checkbox"/> crampe au mollet     |
| <input type="checkbox"/> frilosité                                    | <input type="checkbox"/> diarrhée             |
| <input type="checkbox"/> vertige                                      | <input type="checkbox"/> jambes sans repos    |
| <input type="checkbox"/> faim                                         | <input type="checkbox"/> constipation         |
| <input type="checkbox"/> éruption cutanée                             | <input type="checkbox"/> palpitations         |
| <input type="checkbox"/> ballonnements                                | <input type="checkbox"/> troubles de la vue   |
| <input type="checkbox"/> autres: _____                                | <input type="checkbox"/> envie de manger      |

**Aujourd'hui ...**

|                                                                 | jamais | de temps en temps | moins de la moitié du temps | plus de la moitié du temps | la plupart du temps | tout le temps |
|-----------------------------------------------------------------|--------|-------------------|-----------------------------|----------------------------|---------------------|---------------|
| ...je me suis senti(e) bien et de bonne humeur                  | 0      | 1                 | 2                           | 3                          | 4                   | 5             |
| ...je me suis senti(e) calme et tranquille                      | 0      | 1                 | 2                           | 3                          | 4                   | 5             |
| ...je me suis senti(e) plein(e) d'énergie et vigoureux(se)      | 0      | 1                 | 2                           | 3                          | 4                   | 5             |
| ...je me suis réveillé(e) en me sentant frais(che) et dispos(e) | 0      | 1                 | 2                           | 3                          | 4                   | 5             |
| ...ma vie quotidienne a été remplie de choses intéressantes     | 0      | 1                 | 2                           | 3                          | 4                   | 5             |



**Symptômes depuis l'arrivée à la clinique:**  non  oui

- |                                                                       |                                               |
|-----------------------------------------------------------------------|-----------------------------------------------|
| <input type="checkbox"/> maux de tête                                 | <input type="checkbox"/> douleurs musculaires |
| <input type="checkbox"/> trouble du sommeil                           | <input type="checkbox"/> brûlures d'estomac   |
| <input type="checkbox"/> haleine chargée<br>(demandez à l'infirmière) | <input type="checkbox"/> nausée               |
| <input type="checkbox"/> fatigue                                      | <input type="checkbox"/> bouche sèche         |
| <input type="checkbox"/> mal de dos                                   | <input type="checkbox"/> crampe au mollet     |
| <input type="checkbox"/> frilosité                                    | <input type="checkbox"/> diarrhée             |
| <input type="checkbox"/> vertige                                      | <input type="checkbox"/> jambes sans repos    |
| <input type="checkbox"/> faim                                         | <input type="checkbox"/> constipation         |
| <input type="checkbox"/> éruption cutanée                             | <input type="checkbox"/> palpitations         |
| <input type="checkbox"/> ballonnements                                | <input type="checkbox"/> troubles de la vue   |
| <input type="checkbox"/> autres: _____                                | <input type="checkbox"/> envie de manger      |

**Aujourd'hui ...**

|                                                                 | jamais | de temps en temps | moins de la moitié du temps | plus de la moitié du temps | la plupart du temps | tout le temps |
|-----------------------------------------------------------------|--------|-------------------|-----------------------------|----------------------------|---------------------|---------------|
| ...je me suis senti(e) bien et de bonne humeur                  | 0      | 1                 | 2                           | 3                          | 4                   | 5             |
| ...je me suis senti(e) calme et tranquille                      | 0      | 1                 | 2                           | 3                          | 4                   | 5             |
| ...je me suis senti(e) plein(e) d'énergie et vigoureux(se)      | 0      | 1                 | 2                           | 3                          | 4                   | 5             |
| ...je me suis réveillé(e) en me sentant frais(che) et dispos(e) | 0      | 1                 | 2                           | 3                          | 4                   | 5             |
| ...ma vie quotidienne a été remplie de choses intéressantes     | 0      | 1                 | 2                           | 3                          | 4                   | 5             |

7. jour : \_\_\_\_\_

Corps cétoniques (mg/dl):     0    5    15    40    80    160

Régime :     800 kcal     1.200 kcal     1.800 kcal

suppléments :     non     poisson

autre : \_\_\_\_\_

Jour de repos     riz     pommes de terre/légumes

digestif :     fruits     autre : \_\_\_\_\_

Jeûne :    miel     non     oui

midi :    jus (¼l)     non     oui

          bouillon (¼l)     non     oui

soir :    bouillon (¼l)     non     oui

suppléments:     non     Kousmine     Kousmine vegan

yoghourt     décoction d'avoine

décoction de riz     jus de carotte

thé vert     thé noir

autre : \_\_\_\_\_

Rupture du jeûne

Jour de réalimentation :     1     2     3     4

Votre état de santé physique :

très mauvais

|   |   |   |   |   |   |   |   |   |   |    |
|---|---|---|---|---|---|---|---|---|---|----|
| 0 | 1 | 2 | 3 | 4 | 5 | 6 | 7 | 8 | 9 | 10 |
|---|---|---|---|---|---|---|---|---|---|----|

excellent

Votre état de santé émotionnelle :

très mauvais

|   |   |   |   |   |   |   |   |   |   |    |
|---|---|---|---|---|---|---|---|---|---|----|
| 0 | 1 | 2 | 3 | 4 | 5 | 6 | 7 | 8 | 9 | 10 |
|---|---|---|---|---|---|---|---|---|---|----|

excellent

## Symptômes depuis l'arrivée à la clinique:

non  oui

- |                                                                       |                                               |
|-----------------------------------------------------------------------|-----------------------------------------------|
| <input type="checkbox"/> maux de tête                                 | <input type="checkbox"/> douleurs musculaires |
| <input type="checkbox"/> trouble du sommeil                           | <input type="checkbox"/> brûlures d'estomac   |
| <input type="checkbox"/> haleine chargée<br>(demandez à l'infirmière) | <input type="checkbox"/> nausée               |
| <input type="checkbox"/> fatigue                                      | <input type="checkbox"/> bouche sèche         |
| <input type="checkbox"/> mal de dos                                   | <input type="checkbox"/> crampe au mollet     |
| <input type="checkbox"/> frilosité                                    | <input type="checkbox"/> diarrhée             |
| <input type="checkbox"/> vertige                                      | <input type="checkbox"/> jambes sans repos    |
| <input type="checkbox"/> faim                                         | <input type="checkbox"/> constipation         |
| <input type="checkbox"/> éruption cutanée                             | <input type="checkbox"/> palpitations         |
| <input type="checkbox"/> ballonnements                                | <input type="checkbox"/> troubles de la vue   |
| <input type="checkbox"/> autres: _____                                | <input type="checkbox"/> envie de manger      |

## Aujourd'hui ...

|                                                                 | jamais | de temps en temps | moins de la moitié du temps | plus de la moitié du temps | la plupart du temps | tout le temps |
|-----------------------------------------------------------------|--------|-------------------|-----------------------------|----------------------------|---------------------|---------------|
| ...je me suis senti(e) bien et de bonne humeur                  | 0      | 1                 | 2                           | 3                          | 4                   | 5             |
| ...je me suis senti(e) calme et tranquille                      | 0      | 1                 | 2                           | 3                          | 4                   | 5             |
| ...je me suis senti(e) plein(e) d'énergie et vigoureux(se)      | 0      | 1                 | 2                           | 3                          | 4                   | 5             |
| ...je me suis réveillé(e) en me sentant frais(che) et dispos(e) | 0      | 1                 | 2                           | 3                          | 4                   | 5             |
| ...ma vie quotidienne a été remplie de choses intéressantes     | 0      | 1                 | 2                           | 3                          | 4                   | 5             |

8. jour : \_\_\_\_\_

Corps cétoniques (mg/dl):     0    5    15    40    80    160

Régime :     800 kcal     1.200 kcal     1.800 kcal

suppléments :     non     poisson

autre : \_\_\_\_\_

Jour de repos     riz     pommes de terre/légumes

digestif :     fruits     autre : \_\_\_\_\_

Jeûne :    miel     non     oui

midi :    jus (¼l)     non     oui

          bouillon (¼l)     non     oui

soir :    bouillon (¼l)     non     oui

suppléments:     non     Kousmine     Kousmine vegan

yoghourt     décoction d'avoine

décoction de riz     jus de carotte

thé vert     thé noir

autre : \_\_\_\_\_

Rupture du jeûne

Jour de réalimentation :     1     2     3     4

Votre état de santé physique :

très mauvais

|   |   |   |   |   |   |   |   |   |   |    |
|---|---|---|---|---|---|---|---|---|---|----|
| 0 | 1 | 2 | 3 | 4 | 5 | 6 | 7 | 8 | 9 | 10 |
|---|---|---|---|---|---|---|---|---|---|----|

excellent

Votre état de santé émotionnelle :

très mauvais

|   |   |   |   |   |   |   |   |   |   |    |
|---|---|---|---|---|---|---|---|---|---|----|
| 0 | 1 | 2 | 3 | 4 | 5 | 6 | 7 | 8 | 9 | 10 |
|---|---|---|---|---|---|---|---|---|---|----|

excellent

## Symptômes depuis l'arrivée à la clinique:

non  oui

- |                                                                       |                                               |
|-----------------------------------------------------------------------|-----------------------------------------------|
| <input type="checkbox"/> maux de tête                                 | <input type="checkbox"/> douleurs musculaires |
| <input type="checkbox"/> trouble du sommeil                           | <input type="checkbox"/> brûlures d'estomac   |
| <input type="checkbox"/> haleine chargée<br>(demandez à l'infirmière) | <input type="checkbox"/> nausée               |
| <input type="checkbox"/> fatigue                                      | <input type="checkbox"/> bouche sèche         |
| <input type="checkbox"/> mal de dos                                   | <input type="checkbox"/> crampe au mollet     |
| <input type="checkbox"/> frilosité                                    | <input type="checkbox"/> diarrhée             |
| <input type="checkbox"/> vertige                                      | <input type="checkbox"/> jambes sans repos    |
| <input type="checkbox"/> faim                                         | <input type="checkbox"/> constipation         |
| <input type="checkbox"/> éruption cutanée                             | <input type="checkbox"/> palpitations         |
| <input type="checkbox"/> ballonnements                                | <input type="checkbox"/> troubles de la vue   |
| <input type="checkbox"/> autres: _____                                | <input type="checkbox"/> envie de manger      |

## Aujourd'hui ...

|                                                                 | jamais | de temps en temps | moins de la moitié du temps | plus de la moitié du temps | la plupart du temps | tout le temps |
|-----------------------------------------------------------------|--------|-------------------|-----------------------------|----------------------------|---------------------|---------------|
| ...je me suis senti(e) bien et de bonne humeur                  | 0      | 1                 | 2                           | 3                          | 4                   | 5             |
| ...je me suis senti(e) calme et tranquille                      | 0      | 1                 | 2                           | 3                          | 4                   | 5             |
| ...je me suis senti(e) plein(e) d'énergie et vigoureux(se)      | 0      | 1                 | 2                           | 3                          | 4                   | 5             |
| ...je me suis réveillé(e) en me sentant frais(che) et dispos(e) | 0      | 1                 | 2                           | 3                          | 4                   | 5             |
| ...ma vie quotidienne a été remplie de choses intéressantes     | 0      | 1                 | 2                           | 3                          | 4                   | 5             |

9. jour : \_\_\_\_\_

Corps cétoniques (mg/dl):     0    5    15    40    80    160

Régime :     800 kcal     1.200 kcal     1.800 kcal

suppléments :     non     poisson

autre : \_\_\_\_\_

Jour de repos     riz     pommes de terre/légumes

digestif :     fruits     autre : \_\_\_\_\_

Jeûne :    miel     non     oui

midi :    jus (¼l)     non     oui

          bouillon (¼l)     non     oui

soir :    bouillon (¼l)     non     oui

suppléments:     non     Kousmine     Kousmine vegan

yoghourt     décoction d'avoine

décoction de riz     jus de carotte

thé vert     thé noir

autre : \_\_\_\_\_

Rupture du jeûne

Jour de réalimentation :     1     2     3     4

Votre état de santé physique :

très mauvais

|   |   |   |   |   |   |   |   |   |   |    |
|---|---|---|---|---|---|---|---|---|---|----|
| 0 | 1 | 2 | 3 | 4 | 5 | 6 | 7 | 8 | 9 | 10 |
|---|---|---|---|---|---|---|---|---|---|----|

excellent

Votre état de santé émotionnelle :

très mauvais

|   |   |   |   |   |   |   |   |   |   |    |
|---|---|---|---|---|---|---|---|---|---|----|
| 0 | 1 | 2 | 3 | 4 | 5 | 6 | 7 | 8 | 9 | 10 |
|---|---|---|---|---|---|---|---|---|---|----|

excellent



## Symptômes depuis l'arrivée à la clinique:

non  oui

- |                                                                       |                                               |
|-----------------------------------------------------------------------|-----------------------------------------------|
| <input type="checkbox"/> maux de tête                                 | <input type="checkbox"/> douleurs musculaires |
| <input type="checkbox"/> trouble du sommeil                           | <input type="checkbox"/> brûlures d'estomac   |
| <input type="checkbox"/> haleine chargée<br>(demandez à l'infirmière) | <input type="checkbox"/> nausée               |
| <input type="checkbox"/> fatigue                                      | <input type="checkbox"/> bouche sèche         |
| <input type="checkbox"/> mal de dos                                   | <input type="checkbox"/> crampe au mollet     |
| <input type="checkbox"/> frilosité                                    | <input type="checkbox"/> diarrhée             |
| <input type="checkbox"/> vertige                                      | <input type="checkbox"/> jambes sans repos    |
| <input type="checkbox"/> faim                                         | <input type="checkbox"/> constipation         |
| <input type="checkbox"/> éruption cutanée                             | <input type="checkbox"/> palpitations         |
| <input type="checkbox"/> ballonnements                                | <input type="checkbox"/> troubles de la vue   |
| <input type="checkbox"/> autres: _____                                | <input type="checkbox"/> envie de manger      |

## Aujourd'hui ...

|                                                                 | jamais | de temps en temps | moins de la moitié du temps | plus de la moitié du temps | la plupart du temps | tout le temps |
|-----------------------------------------------------------------|--------|-------------------|-----------------------------|----------------------------|---------------------|---------------|
| ...je me suis senti(e) bien et de bonne humeur                  | 0      | 1                 | 2                           | 3                          | 4                   | 5             |
| ...je me suis senti(e) calme et tranquille                      | 0      | 1                 | 2                           | 3                          | 4                   | 5             |
| ...je me suis senti(e) plein(e) d'énergie et vigoureux(se)      | 0      | 1                 | 2                           | 3                          | 4                   | 5             |
| ...je me suis réveillé(e) en me sentant frais(che) et dispos(e) | 0      | 1                 | 2                           | 3                          | 4                   | 5             |
| ...ma vie quotidienne a été remplie de choses intéressantes     | 0      | 1                 | 2                           | 3                          | 4                   | 5             |

10. jour : \_\_\_\_\_

Corps cétoniques (mg/dl):     0    5    15    40    80    160

Régime :     800 kcal     1.200 kcal     1.800 kcal

suppléments :     non     poisson

autre : \_\_\_\_\_

Jour de repos     riz     pommes de terre/légumes

digestif :     fruits     autre : \_\_\_\_\_

Jeûne :    miel     non     oui

    midi :    jus (¼l)     non     oui

              bouillon (¼l)     non     oui

    soir :    bouillon (¼l)     non     oui

suppléments:     non     Kousmine     Kousmine vegan

yoghourt     décoction d'avoine

décoction de riz     jus de carotte

thé vert     thé noir

autre : \_\_\_\_\_

Rupture du jeûne

Jour de réalimentation :     1     2     3     4

Votre état de santé physique :

très mauvais

|   |   |   |   |   |   |   |   |   |   |    |
|---|---|---|---|---|---|---|---|---|---|----|
| 0 | 1 | 2 | 3 | 4 | 5 | 6 | 7 | 8 | 9 | 10 |
|---|---|---|---|---|---|---|---|---|---|----|

excellent

Votre état de santé émotionnelle :

très mauvais

|   |   |   |   |   |   |   |   |   |   |    |
|---|---|---|---|---|---|---|---|---|---|----|
| 0 | 1 | 2 | 3 | 4 | 5 | 6 | 7 | 8 | 9 | 10 |
|---|---|---|---|---|---|---|---|---|---|----|

excellent

**Symptômes depuis l'arrivée à la clinique:**       non     oui

- |                                                                       |                                               |
|-----------------------------------------------------------------------|-----------------------------------------------|
| <input type="checkbox"/> maux de tête                                 | <input type="checkbox"/> douleurs musculaires |
| <input type="checkbox"/> trouble du sommeil                           | <input type="checkbox"/> brûlures d'estomac   |
| <input type="checkbox"/> haleine chargée<br>(demandez à l'infirmière) | <input type="checkbox"/> nausée               |
| <input type="checkbox"/> fatigue                                      | <input type="checkbox"/> bouche sèche         |
| <input type="checkbox"/> mal de dos                                   | <input type="checkbox"/> crampe au mollet     |
| <input type="checkbox"/> frilosité                                    | <input type="checkbox"/> diarrhée             |
| <input type="checkbox"/> vertige                                      | <input type="checkbox"/> jambes sans repos    |
| <input type="checkbox"/> faim                                         | <input type="checkbox"/> constipation         |
| <input type="checkbox"/> éruption cutanée                             | <input type="checkbox"/> palpitations         |
| <input type="checkbox"/> ballonnements                                | <input type="checkbox"/> troubles de la vue   |
| <input type="checkbox"/> autres: _____                                | <input type="checkbox"/> envie de manger      |

**Aujourd'hui ...**

|                                                                 | jamais | de temps en temps | moins de la moitié du temps | plus de la moitié du temps | la plupart du temps | tout le temps |
|-----------------------------------------------------------------|--------|-------------------|-----------------------------|----------------------------|---------------------|---------------|
| ...je me suis senti(e) bien et de bonne humeur                  | 0      | 1                 | 2                           | 3                          | 4                   | 5             |
| ...je me suis senti(e) calme et tranquille                      | 0      | 1                 | 2                           | 3                          | 4                   | 5             |
| ...je me suis senti(e) plein(e) d'énergie et vigoureux(se)      | 0      | 1                 | 2                           | 3                          | 4                   | 5             |
| ...je me suis réveillé(e) en me sentant frais(che) et dispos(e) | 0      | 1                 | 2                           | 3                          | 4                   | 5             |
| ...ma vie quotidienne a été remplie de choses intéressantes     | 0      | 1                 | 2                           | 3                          | 4                   | 5             |

11. jour : \_\_\_\_\_

Corps cétoniques (mg/dl):     0    5    15    40    80    160

Régime :     800 kcal     1.200 kcal     1.800 kcal

suppléments :     non     poisson

autre : \_\_\_\_\_

Jour de repos     riz     pommes de terre/légumes

digestif :     fruits     autre : \_\_\_\_\_

Jeûne :    miel     non     oui

midi :    jus (¼l)     non     oui

          bouillon (¼l)     non     oui

soir :    bouillon (¼l)     non     oui

suppléments:     non     Kousmine     Kousmine vegan

yoghourt     décoction d'avoine

décoction de riz     jus de carotte

thé vert     thé noir

autre : \_\_\_\_\_

Rupture du jeûne

Jour de réalimentation :     1     2     3     4

Votre état de santé physique :

très mauvais

|   |   |   |   |   |   |   |   |   |   |    |
|---|---|---|---|---|---|---|---|---|---|----|
| 0 | 1 | 2 | 3 | 4 | 5 | 6 | 7 | 8 | 9 | 10 |
|---|---|---|---|---|---|---|---|---|---|----|

excellent

Votre état de santé émotionnelle :

très mauvais

|   |   |   |   |   |   |   |   |   |   |    |
|---|---|---|---|---|---|---|---|---|---|----|
| 0 | 1 | 2 | 3 | 4 | 5 | 6 | 7 | 8 | 9 | 10 |
|---|---|---|---|---|---|---|---|---|---|----|

excellent

**Symptômes depuis l'arrivée à la clinique:**  non  oui

- |                                                                       |                                               |
|-----------------------------------------------------------------------|-----------------------------------------------|
| <input type="checkbox"/> maux de tête                                 | <input type="checkbox"/> douleurs musculaires |
| <input type="checkbox"/> trouble du sommeil                           | <input type="checkbox"/> brûlures d'estomac   |
| <input type="checkbox"/> haleine chargée<br>(demandez à l'infirmière) | <input type="checkbox"/> nausée               |
| <input type="checkbox"/> fatigue                                      | <input type="checkbox"/> bouche sèche         |
| <input type="checkbox"/> mal de dos                                   | <input type="checkbox"/> crampe au mollet     |
| <input type="checkbox"/> frilosité                                    | <input type="checkbox"/> diarrhée             |
| <input type="checkbox"/> vertige                                      | <input type="checkbox"/> jambes sans repos    |
| <input type="checkbox"/> faim                                         | <input type="checkbox"/> constipation         |
| <input type="checkbox"/> éruption cutanée                             | <input type="checkbox"/> palpitations         |
| <input type="checkbox"/> ballonnements                                | <input type="checkbox"/> troubles de la vue   |
| <input type="checkbox"/> autres: _____                                | <input type="checkbox"/> envie de manger      |

**Aujourd'hui ...**

|                                                                 | jamais | de temps en temps | moins de la moitié du temps | plus de la moitié du temps | la plupart du temps | tout le temps |
|-----------------------------------------------------------------|--------|-------------------|-----------------------------|----------------------------|---------------------|---------------|
| ...je me suis senti(e) bien et de bonne humeur                  | 0      | 1                 | 2                           | 3                          | 4                   | 5             |
| ...je me suis senti(e) calme et tranquille                      | 0      | 1                 | 2                           | 3                          | 4                   | 5             |
| ...je me suis senti(e) plein(e) d'énergie et vigoureux(se)      | 0      | 1                 | 2                           | 3                          | 4                   | 5             |
| ...je me suis réveillé(e) en me sentant frais(che) et dispos(e) | 0      | 1                 | 2                           | 3                          | 4                   | 5             |
| ...ma vie quotidienne a été remplie de choses intéressantes     | 0      | 1                 | 2                           | 3                          | 4                   | 5             |

12. jour : \_\_\_\_\_

Corps cétoniques (mg/dl):     0    5    15    40    80    160

Régime :     800 kcal     1.200 kcal     1.800 kcal

suppléments :     non     poisson

autre : \_\_\_\_\_

Jour de repos     riz     pommes de terre/légumes

digestif :     fruits     autre : \_\_\_\_\_

Jeûne :    miel     non     oui

midi :    jus (¼l)     non     oui

          bouillon (¼l)     non     oui

soir :    bouillon (¼l)     non     oui

suppléments:     non     Kousmine     Kousmine vegan

yoghourt     décoction d'avoine

décoction de riz     jus de carotte

thé vert     thé noir

autre : \_\_\_\_\_

Rupture du jeûne

Jour de réalimentation :     1     2     3     4

Votre état de santé physique :

très mauvais

|   |   |   |   |   |   |   |   |   |   |    |
|---|---|---|---|---|---|---|---|---|---|----|
| 0 | 1 | 2 | 3 | 4 | 5 | 6 | 7 | 8 | 9 | 10 |
|---|---|---|---|---|---|---|---|---|---|----|

excellent

Votre état de santé émotionnelle :

très mauvais

|   |   |   |   |   |   |   |   |   |   |    |
|---|---|---|---|---|---|---|---|---|---|----|
| 0 | 1 | 2 | 3 | 4 | 5 | 6 | 7 | 8 | 9 | 10 |
|---|---|---|---|---|---|---|---|---|---|----|

excellent

## Symptômes depuis l'arrivée à la clinique:

non  oui

- |                                                                       |                                               |
|-----------------------------------------------------------------------|-----------------------------------------------|
| <input type="checkbox"/> maux de tête                                 | <input type="checkbox"/> douleurs musculaires |
| <input type="checkbox"/> trouble du sommeil                           | <input type="checkbox"/> brûlures d'estomac   |
| <input type="checkbox"/> haleine chargée<br>(demandez à l'infirmière) | <input type="checkbox"/> nausée               |
| <input type="checkbox"/> fatigue                                      | <input type="checkbox"/> bouche sèche         |
| <input type="checkbox"/> mal de dos                                   | <input type="checkbox"/> crampe au mollet     |
| <input type="checkbox"/> frilosité                                    | <input type="checkbox"/> diarrhée             |
| <input type="checkbox"/> vertige                                      | <input type="checkbox"/> jambes sans repos    |
| <input type="checkbox"/> faim                                         | <input type="checkbox"/> constipation         |
| <input type="checkbox"/> éruption cutanée                             | <input type="checkbox"/> palpitations         |
| <input type="checkbox"/> ballonnements                                | <input type="checkbox"/> troubles de la vue   |
| <input type="checkbox"/> autres: _____                                | <input type="checkbox"/> envie de manger      |

## Aujourd'hui ...

|                                                                 | jamais | de temps en temps | moins de la moitié du temps | plus de la moitié du temps | la plupart du temps | tout le temps |
|-----------------------------------------------------------------|--------|-------------------|-----------------------------|----------------------------|---------------------|---------------|
| ...je me suis senti(e) bien et de bonne humeur                  | 0      | 1                 | 2                           | 3                          | 4                   | 5             |
| ...je me suis senti(e) calme et tranquille                      | 0      | 1                 | 2                           | 3                          | 4                   | 5             |
| ...je me suis senti(e) plein(e) d'énergie et vigoureux(se)      | 0      | 1                 | 2                           | 3                          | 4                   | 5             |
| ...je me suis réveillé(e) en me sentant frais(che) et dispos(e) | 0      | 1                 | 2                           | 3                          | 4                   | 5             |
| ...ma vie quotidienne a été remplie de choses intéressantes     | 0      | 1                 | 2                           | 3                          | 4                   | 5             |

13. jour : \_\_\_\_\_

Corps cétoniques (mg/dl):     0    5    15    40    80    160

Régime :     800 kcal     1.200 kcal     1.800 kcal

suppléments :     non     poisson

autre : \_\_\_\_\_

Jour de repos     riz     pommes de terre/légumes

digestif :     fruits     autre : \_\_\_\_\_

Jeûne :    miel     non     oui

midi :    jus (¼l)     non     oui

          bouillon (¼l)     non     oui

soir :    bouillon (¼l)     non     oui

suppléments:  non    Kousmine     Kousmine vegan  
 yoghourt     décoction d'avoine  
 décoction de riz    jus de carotte  
 thé vert     thé noir  
 autre : \_\_\_\_\_

Rupture du jeûne

Jour de réalimentation :     1     2     3     4

Votre état de santé physique :

très mauvais

|   |   |   |   |   |   |   |   |   |   |    |
|---|---|---|---|---|---|---|---|---|---|----|
| 0 | 1 | 2 | 3 | 4 | 5 | 6 | 7 | 8 | 9 | 10 |
|---|---|---|---|---|---|---|---|---|---|----|

excellent

Votre état de santé émotionnelle :

très mauvais

|   |   |   |   |   |   |   |   |   |   |    |
|---|---|---|---|---|---|---|---|---|---|----|
| 0 | 1 | 2 | 3 | 4 | 5 | 6 | 7 | 8 | 9 | 10 |
|---|---|---|---|---|---|---|---|---|---|----|

excellent



## Symptômes depuis l'arrivée à la clinique:

non  oui

- |                                                                       |                                               |
|-----------------------------------------------------------------------|-----------------------------------------------|
| <input type="checkbox"/> maux de tête                                 | <input type="checkbox"/> douleurs musculaires |
| <input type="checkbox"/> trouble du sommeil                           | <input type="checkbox"/> brûlures d'estomac   |
| <input type="checkbox"/> haleine chargée<br>(demandez à l'infirmière) | <input type="checkbox"/> nausée               |
| <input type="checkbox"/> fatigue                                      | <input type="checkbox"/> bouche sèche         |
| <input type="checkbox"/> mal de dos                                   | <input type="checkbox"/> crampe au mollet     |
| <input type="checkbox"/> frilosité                                    | <input type="checkbox"/> diarrhée             |
| <input type="checkbox"/> vertige                                      | <input type="checkbox"/> jambes sans repos    |
| <input type="checkbox"/> faim                                         | <input type="checkbox"/> constipation         |
| <input type="checkbox"/> éruption cutanée                             | <input type="checkbox"/> palpitations         |
| <input type="checkbox"/> ballonnements                                | <input type="checkbox"/> troubles de la vue   |
| <input type="checkbox"/> autres: _____                                | <input type="checkbox"/> envie de manger      |

## Aujourd'hui ...

|                                                                 | jamais | de temps en temps | moins de la moitié du temps | plus de la moitié du temps | la plupart du temps | tout le temps |
|-----------------------------------------------------------------|--------|-------------------|-----------------------------|----------------------------|---------------------|---------------|
| ...je me suis senti(e) bien et de bonne humeur                  | 0      | 1                 | 2                           | 3                          | 4                   | 5             |
| ...je me suis senti(e) calme et tranquille                      | 0      | 1                 | 2                           | 3                          | 4                   | 5             |
| ...je me suis senti(e) plein(e) d'énergie et vigoureux(se)      | 0      | 1                 | 2                           | 3                          | 4                   | 5             |
| ...je me suis réveillé(e) en me sentant frais(che) et dispos(e) | 0      | 1                 | 2                           | 3                          | 4                   | 5             |
| ...ma vie quotidienne a été remplie de choses intéressantes     | 0      | 1                 | 2                           | 3                          | 4                   | 5             |

14. jour : \_\_\_\_\_

Corps cétoniques (mg/dl):     0    5    15    40    80    160

Régime :     800 kcal     1.200 kcal     1.800 kcal

suppléments :     non     poisson

autre : \_\_\_\_\_

Jour de repos     riz     pommes de terre/légumes

digestif :     fruits     autre : \_\_\_\_\_

Jeûne :    miel     non     oui

midi :    jus (¼l)     non     oui

          bouillon (¼l)     non     oui

soir :    bouillon (¼l)     non     oui

suppléments:     non     Kousmine     Kousmine vegan

yoghourt     décoction d'avoine

décoction de riz     jus de carotte

thé vert     thé noir

autre : \_\_\_\_\_

Rupture du jeûne

Jour de réalimentation :     1     2     3     4

Votre état de santé physique :

très mauvais

|   |   |   |   |   |   |   |   |   |   |    |
|---|---|---|---|---|---|---|---|---|---|----|
| 0 | 1 | 2 | 3 | 4 | 5 | 6 | 7 | 8 | 9 | 10 |
|---|---|---|---|---|---|---|---|---|---|----|

excellent

Votre état de santé émotionnelle :

très mauvais

|   |   |   |   |   |   |   |   |   |   |    |
|---|---|---|---|---|---|---|---|---|---|----|
| 0 | 1 | 2 | 3 | 4 | 5 | 6 | 7 | 8 | 9 | 10 |
|---|---|---|---|---|---|---|---|---|---|----|

excellent

**Symptômes depuis l'arrivée à la clinique:**
 non     oui

- |                                                                       |                                               |
|-----------------------------------------------------------------------|-----------------------------------------------|
| <input type="checkbox"/> maux de tête                                 | <input type="checkbox"/> douleurs musculaires |
| <input type="checkbox"/> trouble du sommeil                           | <input type="checkbox"/> brûlures d'estomac   |
| <input type="checkbox"/> haleine chargée<br>(demandez à l'infirmière) | <input type="checkbox"/> nausée               |
| <input type="checkbox"/> fatigue                                      | <input type="checkbox"/> bouche sèche         |
| <input type="checkbox"/> mal de dos                                   | <input type="checkbox"/> crampe au mollet     |
| <input type="checkbox"/> frilosité                                    | <input type="checkbox"/> diarrhée             |
| <input type="checkbox"/> vertige                                      | <input type="checkbox"/> jambes sans repos    |
| <input type="checkbox"/> faim                                         | <input type="checkbox"/> constipation         |
| <input type="checkbox"/> éruption cutanée                             | <input type="checkbox"/> palpitations         |
| <input type="checkbox"/> ballonnements                                | <input type="checkbox"/> troubles de la vue   |
| <input type="checkbox"/> autres: _____                                | <input type="checkbox"/> envie de manger      |

**Aujourd'hui ...**

|                                                                 | jamais | de temps en temps | moins de la moitié du temps | plus de la moitié du temps | la plupart du temps | tout le temps |
|-----------------------------------------------------------------|--------|-------------------|-----------------------------|----------------------------|---------------------|---------------|
| ...je me suis senti(e) bien et de bonne humeur                  | 0      | 1                 | 2                           | 3                          | 4                   | 5             |
| ...je me suis senti(e) calme et tranquille                      | 0      | 1                 | 2                           | 3                          | 4                   | 5             |
| ...je me suis senti(e) plein(e) d'énergie et vigoureux(se)      | 0      | 1                 | 2                           | 3                          | 4                   | 5             |
| ...je me suis réveillé(e) en me sentant frais(che) et dispos(e) | 0      | 1                 | 2                           | 3                          | 4                   | 5             |
| ...ma vie quotidienne a été remplie de choses intéressantes     | 0      | 1                 | 2                           | 3                          | 4                   | 5             |

15. jour : \_\_\_\_\_

Corps cétoniques (mg/dl):     0    5    15    40    80    160

Régime :     800 kcal     1.200 kcal     1.800 kcal

suppléments :     non     poisson

autre : \_\_\_\_\_

Jour de repos digestif :     riz     pommes de terre/légumes  
 fruits     autre : \_\_\_\_\_

Jeûne :    miel     non     oui

    midi :    jus (¼l)     non     oui

              bouillon (¼l)     non     oui

    soir :    bouillon (¼l)     non     oui

suppléments:     non     Kousmine     Kousmine vegan  
                       yoghourt     décoction d'avoine  
                       décoction de riz     jus de carotte  
                       thé vert     thé noir  
 autre : \_\_\_\_\_

Rupture du jeûne

Jour de réalimentation :     1     2     3     4

Votre état de santé physique :

très mauvais

|   |   |   |   |   |   |   |   |   |   |    |
|---|---|---|---|---|---|---|---|---|---|----|
| 0 | 1 | 2 | 3 | 4 | 5 | 6 | 7 | 8 | 9 | 10 |
|---|---|---|---|---|---|---|---|---|---|----|

excellent

Votre état de santé émotionnelle :

très mauvais

|   |   |   |   |   |   |   |   |   |   |    |
|---|---|---|---|---|---|---|---|---|---|----|
| 0 | 1 | 2 | 3 | 4 | 5 | 6 | 7 | 8 | 9 | 10 |
|---|---|---|---|---|---|---|---|---|---|----|

excellent

## Symptômes depuis l'arrivée à la clinique:

non  oui

- |                                                                       |                                               |
|-----------------------------------------------------------------------|-----------------------------------------------|
| <input type="checkbox"/> maux de tête                                 | <input type="checkbox"/> douleurs musculaires |
| <input type="checkbox"/> trouble du sommeil                           | <input type="checkbox"/> brûlures d'estomac   |
| <input type="checkbox"/> haleine chargée<br>(demandez à l'infirmière) | <input type="checkbox"/> nausée               |
| <input type="checkbox"/> fatigue                                      | <input type="checkbox"/> bouche sèche         |
| <input type="checkbox"/> mal de dos                                   | <input type="checkbox"/> crampe au mollet     |
| <input type="checkbox"/> frilosité                                    | <input type="checkbox"/> diarrhée             |
| <input type="checkbox"/> vertige                                      | <input type="checkbox"/> jambes sans repos    |
| <input type="checkbox"/> faim                                         | <input type="checkbox"/> constipation         |
| <input type="checkbox"/> éruption cutanée                             | <input type="checkbox"/> palpitations         |
| <input type="checkbox"/> ballonnements                                | <input type="checkbox"/> troubles de la vue   |
| <input type="checkbox"/> autres: _____                                | <input type="checkbox"/> envie de manger      |

## Aujourd'hui ...

|                                                                 | jamais | de temps en temps | moins de la moitié du temps | plus de la moitié du temps | la plupart du temps | tout le temps |
|-----------------------------------------------------------------|--------|-------------------|-----------------------------|----------------------------|---------------------|---------------|
| ...je me suis senti(e) bien et de bonne humeur                  | 0      | 1                 | 2                           | 3                          | 4                   | 5             |
| ...je me suis senti(e) calme et tranquille                      | 0      | 1                 | 2                           | 3                          | 4                   | 5             |
| ...je me suis senti(e) plein(e) d'énergie et vigoureux(se)      | 0      | 1                 | 2                           | 3                          | 4                   | 5             |
| ...je me suis réveillé(e) en me sentant frais(che) et dispos(e) | 0      | 1                 | 2                           | 3                          | 4                   | 5             |
| ...ma vie quotidienne a été remplie de choses intéressantes     | 0      | 1                 | 2                           | 3                          | 4                   | 5             |

16. jour : \_\_\_\_\_

Corps cétoniques (mg/dl):     0    5    15    40    80    160

Régime :     800 kcal     1.200 kcal     1.800 kcal

suppléments :     non     poisson

autre : \_\_\_\_\_

Jour de repos     riz     pommes de terre/légumes

digestif :     fruits     autre : \_\_\_\_\_

Jeûne :    miel     non     oui

midi :    jus (¼l)     non     oui

          bouillon (¼l)     non     oui

soir :    bouillon (¼l)     non     oui

suppléments:     non     Kousmine     Kousmine vegan

yoghourt     décoction d'avoine

décoction de riz     jus de carotte

thé vert     thé noir

autre : \_\_\_\_\_

Rupture du jeûne

Jour de réalimentation :     1     2     3     4

Votre état de santé physique :

très mauvais

|   |   |   |   |   |   |   |   |   |   |    |
|---|---|---|---|---|---|---|---|---|---|----|
| 0 | 1 | 2 | 3 | 4 | 5 | 6 | 7 | 8 | 9 | 10 |
|---|---|---|---|---|---|---|---|---|---|----|

excellent

Votre état de santé émotionnelle :

très mauvais

|   |   |   |   |   |   |   |   |   |   |    |
|---|---|---|---|---|---|---|---|---|---|----|
| 0 | 1 | 2 | 3 | 4 | 5 | 6 | 7 | 8 | 9 | 10 |
|---|---|---|---|---|---|---|---|---|---|----|

excellent

**Symptômes depuis l'arrivée à la clinique:**       non     oui

- |                                                                       |                                               |
|-----------------------------------------------------------------------|-----------------------------------------------|
| <input type="checkbox"/> maux de tête                                 | <input type="checkbox"/> douleurs musculaires |
| <input type="checkbox"/> trouble du sommeil                           | <input type="checkbox"/> brûlures d'estomac   |
| <input type="checkbox"/> haleine chargée<br>(demandez à l'infirmière) | <input type="checkbox"/> nausée               |
| <input type="checkbox"/> fatigue                                      | <input type="checkbox"/> bouche sèche         |
| <input type="checkbox"/> mal de dos                                   | <input type="checkbox"/> crampe au mollet     |
| <input type="checkbox"/> frilosité                                    | <input type="checkbox"/> diarrhée             |
| <input type="checkbox"/> vertige                                      | <input type="checkbox"/> jambes sans repos    |
| <input type="checkbox"/> faim                                         | <input type="checkbox"/> constipation         |
| <input type="checkbox"/> éruption cutanée                             | <input type="checkbox"/> palpitations         |
| <input type="checkbox"/> ballonnements                                | <input type="checkbox"/> troubles de la vue   |
| <input type="checkbox"/> autres: _____                                | <input type="checkbox"/> envie de manger      |

**Aujourd'hui ...**

|                                                                 | jamais | de temps en temps | moins de la moitié du temps | plus de la moitié du temps | la plupart du temps | tout le temps |
|-----------------------------------------------------------------|--------|-------------------|-----------------------------|----------------------------|---------------------|---------------|
| ...je me suis senti(e) bien et de bonne humeur                  | 0      | 1                 | 2                           | 3                          | 4                   | 5             |
| ...je me suis senti(e) calme et tranquille                      | 0      | 1                 | 2                           | 3                          | 4                   | 5             |
| ...je me suis senti(e) plein(e) d'énergie et vigoureux(se)      | 0      | 1                 | 2                           | 3                          | 4                   | 5             |
| ...je me suis réveillé(e) en me sentant frais(che) et dispos(e) | 0      | 1                 | 2                           | 3                          | 4                   | 5             |
| ...ma vie quotidienne a été remplie de choses intéressantes     | 0      | 1                 | 2                           | 3                          | 4                   | 5             |

17. jour : \_\_\_\_\_

Corps cétoniques (mg/dl):     0    5    15    40    80    160

- Régime :**     800 kcal     1.200 kcal     1.800 kcal  
suppléments :     non     poisson  
                           autre : \_\_\_\_\_
- Jour de repos digestif :**     riz     pommes de terre/légumes  
                                           fruits     autre : \_\_\_\_\_
- Jeûne :**    miel                                             non     oui  
                  midi :    jus (¼l)                                             non     oui  
                                  bouillon (¼l)                                             non     oui  
                  soir :    bouillon (¼l)                                             non     oui
- suppléments:     non     Kousmine                     Kousmine vegan  
                                   yoghourt                     décoction d'avoine  
                                   décoction de riz     jus de carotte  
                                   thé vert                     thé noir  
                                   autre : \_\_\_\_\_
- Rupture du jeûne**
- Jour de réalimentation :**     1     2     3     4

**Votre état de santé physique :**

très mauvais    

|   |   |   |   |   |   |   |   |   |   |    |
|---|---|---|---|---|---|---|---|---|---|----|
| 0 | 1 | 2 | 3 | 4 | 5 | 6 | 7 | 8 | 9 | 10 |
|---|---|---|---|---|---|---|---|---|---|----|

    excellent

**Votre état de santé émotionnelle :**

très mauvais    

|   |   |   |   |   |   |   |   |   |   |    |
|---|---|---|---|---|---|---|---|---|---|----|
| 0 | 1 | 2 | 3 | 4 | 5 | 6 | 7 | 8 | 9 | 10 |
|---|---|---|---|---|---|---|---|---|---|----|

    excellent



## Symptômes depuis l'arrivée à la clinique:

non  oui

- |                                                                       |                                               |
|-----------------------------------------------------------------------|-----------------------------------------------|
| <input type="checkbox"/> maux de tête                                 | <input type="checkbox"/> douleurs musculaires |
| <input type="checkbox"/> trouble du sommeil                           | <input type="checkbox"/> brûlures d'estomac   |
| <input type="checkbox"/> haleine chargée<br>(demandez à l'infirmière) | <input type="checkbox"/> nausée               |
| <input type="checkbox"/> fatigue                                      | <input type="checkbox"/> bouche sèche         |
| <input type="checkbox"/> mal de dos                                   | <input type="checkbox"/> crampe au mollet     |
| <input type="checkbox"/> frilosité                                    | <input type="checkbox"/> diarrhée             |
| <input type="checkbox"/> vertige                                      | <input type="checkbox"/> jambes sans repos    |
| <input type="checkbox"/> faim                                         | <input type="checkbox"/> constipation         |
| <input type="checkbox"/> éruption cutanée                             | <input type="checkbox"/> palpitations         |
| <input type="checkbox"/> ballonnements                                | <input type="checkbox"/> troubles de la vue   |
| <input type="checkbox"/> autres: _____                                | <input type="checkbox"/> envie de manger      |

## Aujourd'hui ...

|                                                                 | jamais | de temps en temps | moins de la moitié du temps | plus de la moitié du temps | la plupart du temps | tout le temps |
|-----------------------------------------------------------------|--------|-------------------|-----------------------------|----------------------------|---------------------|---------------|
| ...je me suis senti(e) bien et de bonne humeur                  | 0      | 1                 | 2                           | 3                          | 4                   | 5             |
| ...je me suis senti(e) calme et tranquille                      | 0      | 1                 | 2                           | 3                          | 4                   | 5             |
| ...je me suis senti(e) plein(e) d'énergie et vigoureux(se)      | 0      | 1                 | 2                           | 3                          | 4                   | 5             |
| ...je me suis réveillé(e) en me sentant frais(che) et dispos(e) | 0      | 1                 | 2                           | 3                          | 4                   | 5             |
| ...ma vie quotidienne a été remplie de choses intéressantes     | 0      | 1                 | 2                           | 3                          | 4                   | 5             |

18. jour : \_\_\_\_\_

Corps cétoniques (mg/dl):     0    5    15    40    80    160

Régime :     800 kcal     1.200 kcal     1.800 kcal

suppléments :     non     poisson

autre : \_\_\_\_\_

Jour de repos     riz     pommes de terre/légumes

digestif :     fruits     autre : \_\_\_\_\_

Jeûne :    miel     non     oui

midi :    jus (¼l)     non     oui

          bouillon (¼l)     non     oui

soir :    bouillon (¼l)     non     oui

suppléments:  non    Kousmine     Kousmine vegan  
 yoghourt     décoction d'avoine  
 décoction de riz    jus de carotte  
 thé vert     thé noir  
 autre : \_\_\_\_\_

Rupture du jeûne

Jour de réalimentation :     1     2     3     4

Votre état de santé physique :

très mauvais    

|   |   |   |   |   |   |   |   |   |   |    |
|---|---|---|---|---|---|---|---|---|---|----|
| 0 | 1 | 2 | 3 | 4 | 5 | 6 | 7 | 8 | 9 | 10 |
|---|---|---|---|---|---|---|---|---|---|----|

    excellent

Votre état de santé émotionnelle :

très mauvais    

|   |   |   |   |   |   |   |   |   |   |    |
|---|---|---|---|---|---|---|---|---|---|----|
| 0 | 1 | 2 | 3 | 4 | 5 | 6 | 7 | 8 | 9 | 10 |
|---|---|---|---|---|---|---|---|---|---|----|

    excellent

**Symptômes depuis l'arrivée à la clinique:**       non     oui

- |                                                                       |                                               |
|-----------------------------------------------------------------------|-----------------------------------------------|
| <input type="checkbox"/> maux de tête                                 | <input type="checkbox"/> douleurs musculaires |
| <input type="checkbox"/> trouble du sommeil                           | <input type="checkbox"/> brûlures d'estomac   |
| <input type="checkbox"/> haleine chargée<br>(demandez à l'infirmière) | <input type="checkbox"/> nausée               |
| <input type="checkbox"/> fatigue                                      | <input type="checkbox"/> bouche sèche         |
| <input type="checkbox"/> mal de dos                                   | <input type="checkbox"/> crampe au mollet     |
| <input type="checkbox"/> frilosité                                    | <input type="checkbox"/> diarrhée             |
| <input type="checkbox"/> vertige                                      | <input type="checkbox"/> jambes sans repos    |
| <input type="checkbox"/> faim                                         | <input type="checkbox"/> constipation         |
| <input type="checkbox"/> éruption cutanée                             | <input type="checkbox"/> palpitations         |
| <input type="checkbox"/> ballonnements                                | <input type="checkbox"/> troubles de la vue   |
| <input type="checkbox"/> autres: _____                                | <input type="checkbox"/> envie de manger      |

**Aujourd'hui ...**

|                                                                 | jamais | de temps en temps | moins de la moitié du temps | plus de la moitié du temps | la plupart du temps | tout le temps |
|-----------------------------------------------------------------|--------|-------------------|-----------------------------|----------------------------|---------------------|---------------|
| ...je me suis senti(e) bien et de bonne humeur                  | 0      | 1                 | 2                           | 3                          | 4                   | 5             |
| ...je me suis senti(e) calme et tranquille                      | 0      | 1                 | 2                           | 3                          | 4                   | 5             |
| ...je me suis senti(e) plein(e) d'énergie et vigoureux(se)      | 0      | 1                 | 2                           | 3                          | 4                   | 5             |
| ...je me suis réveillé(e) en me sentant frais(che) et dispos(e) | 0      | 1                 | 2                           | 3                          | 4                   | 5             |
| ...ma vie quotidienne a été remplie de choses intéressantes     | 0      | 1                 | 2                           | 3                          | 4                   | 5             |

19. jour : \_\_\_\_\_

Corps cétoniques (mg/dl):     0    5    15    40    80    160

Régime :     800 kcal     1.200 kcal     1.800 kcal

suppléments :     non     poisson

autre : \_\_\_\_\_

Jour de repos     riz     pommes de terre/légumes

digestif :     fruits     autre : \_\_\_\_\_

Jeûne :    miel     non     oui

midi :    jus (¼l)     non     oui

          bouillon (¼l)     non     oui

soir :    bouillon (¼l)     non     oui

suppléments:     non     Kousmine     Kousmine vegan

yoghourt     décoction d'avoine

décoction de riz     jus de carotte

thé vert     thé noir

autre : \_\_\_\_\_

Rupture du jeûne

Jour de réalimentation :     1     2     3     4

Votre état de santé physique :

très mauvais

|   |   |   |   |   |   |   |   |   |   |    |
|---|---|---|---|---|---|---|---|---|---|----|
| 0 | 1 | 2 | 3 | 4 | 5 | 6 | 7 | 8 | 9 | 10 |
|---|---|---|---|---|---|---|---|---|---|----|

excellent

Votre état de santé émotionnelle :

très mauvais

|   |   |   |   |   |   |   |   |   |   |    |
|---|---|---|---|---|---|---|---|---|---|----|
| 0 | 1 | 2 | 3 | 4 | 5 | 6 | 7 | 8 | 9 | 10 |
|---|---|---|---|---|---|---|---|---|---|----|

excellent

**Symptômes depuis l'arrivée à la clinique:** non  oui

- |                                                                       |                                               |
|-----------------------------------------------------------------------|-----------------------------------------------|
| <input type="checkbox"/> maux de tête                                 | <input type="checkbox"/> douleurs musculaires |
| <input type="checkbox"/> trouble du sommeil                           | <input type="checkbox"/> brûlures d'estomac   |
| <input type="checkbox"/> haleine chargée<br>(demandez à l'infirmière) | <input type="checkbox"/> nausée               |
| <input type="checkbox"/> fatigue                                      | <input type="checkbox"/> bouche sèche         |
| <input type="checkbox"/> mal de dos                                   | <input type="checkbox"/> crampe au mollet     |
| <input type="checkbox"/> frilosité                                    | <input type="checkbox"/> diarrhée             |
| <input type="checkbox"/> vertige                                      | <input type="checkbox"/> jambes sans repos    |
| <input type="checkbox"/> faim                                         | <input type="checkbox"/> constipation         |
| <input type="checkbox"/> éruption cutanée                             | <input type="checkbox"/> palpitations         |
| <input type="checkbox"/> ballonnements                                | <input type="checkbox"/> troubles de la vue   |
| <input type="checkbox"/> autres: _____                                | <input type="checkbox"/> envie de manger      |

**Aujourd'hui ...**

|                                                                 | jamais | de temps en temps | moins de la moitié du temps | plus de la moitié du temps | la plupart du temps | tout le temps |
|-----------------------------------------------------------------|--------|-------------------|-----------------------------|----------------------------|---------------------|---------------|
| ...je me suis senti(e) bien et de bonne humeur                  | 0      | 1                 | 2                           | 3                          | 4                   | 5             |
| ...je me suis senti(e) calme et tranquille                      | 0      | 1                 | 2                           | 3                          | 4                   | 5             |
| ...je me suis senti(e) plein(e) d'énergie et vigoureux(se)      | 0      | 1                 | 2                           | 3                          | 4                   | 5             |
| ...je me suis réveillé(e) en me sentant frais(che) et dispos(e) | 0      | 1                 | 2                           | 3                          | 4                   | 5             |
| ...ma vie quotidienne a été remplie de choses intéressantes     | 0      | 1                 | 2                           | 3                          | 4                   | 5             |

20. jour : \_\_\_\_\_

Corps cétoniques (mg/dl):     0     5     15     40     80     160

- Régime :**     800 kcal     1.200 kcal     1.800 kcal  
suppléments :     non     poisson  
                          autre : \_\_\_\_\_
- Jour de repos**     riz     pommes de terre/légumes  
**digestif :**     fruits     autre : \_\_\_\_\_
- Jeûne :**    miel     non     oui  
                 midi :    jus (¼l)     non     oui  
                         bouillon (¼l)     non     oui  
                 soir :    bouillon (¼l)     non     oui
- suppléments:  non     Kousmine     Kousmine vegan  
                          yoghourt     décoction d'avoine  
                          décoction de riz     jus de carotte  
                          thé vert     thé noir  
                          autre : \_\_\_\_\_
- Rupture du jeûne**
- Jour de réalimentation :**     1     2     3     4

**Votre état de santé physique :**

très mauvais

|   |   |   |   |   |   |   |   |   |   |    |
|---|---|---|---|---|---|---|---|---|---|----|
| 0 | 1 | 2 | 3 | 4 | 5 | 6 | 7 | 8 | 9 | 10 |
|---|---|---|---|---|---|---|---|---|---|----|

excellent

**Votre état de santé émotionnelle :**

très mauvais

|   |   |   |   |   |   |   |   |   |   |    |
|---|---|---|---|---|---|---|---|---|---|----|
| 0 | 1 | 2 | 3 | 4 | 5 | 6 | 7 | 8 | 9 | 10 |
|---|---|---|---|---|---|---|---|---|---|----|

excellent

## Symptômes depuis l'arrivée à la clinique:

non  oui

- |                                                                       |                                               |
|-----------------------------------------------------------------------|-----------------------------------------------|
| <input type="checkbox"/> maux de tête                                 | <input type="checkbox"/> douleurs musculaires |
| <input type="checkbox"/> trouble du sommeil                           | <input type="checkbox"/> brûlures d'estomac   |
| <input type="checkbox"/> haleine chargée<br>(demandez à l'infirmière) | <input type="checkbox"/> nausée               |
| <input type="checkbox"/> fatigue                                      | <input type="checkbox"/> bouche sèche         |
| <input type="checkbox"/> mal de dos                                   | <input type="checkbox"/> crampe au mollet     |
| <input type="checkbox"/> frilosité                                    | <input type="checkbox"/> diarrhée             |
| <input type="checkbox"/> vertige                                      | <input type="checkbox"/> jambes sans repos    |
| <input type="checkbox"/> faim                                         | <input type="checkbox"/> constipation         |
| <input type="checkbox"/> éruption cutanée                             | <input type="checkbox"/> palpitations         |
| <input type="checkbox"/> ballonnements                                | <input type="checkbox"/> troubles de la vue   |
| <input type="checkbox"/> autres: _____                                | <input type="checkbox"/> envie de manger      |

## Aujourd'hui ...

|                                                                 | jamais | de temps en temps | moins de la moitié du temps | plus de la moitié du temps | la plupart du temps | tout le temps |
|-----------------------------------------------------------------|--------|-------------------|-----------------------------|----------------------------|---------------------|---------------|
| ...je me suis senti(e) bien et de bonne humeur                  | 0      | 1                 | 2                           | 3                          | 4                   | 5             |
| ...je me suis senti(e) calme et tranquille                      | 0      | 1                 | 2                           | 3                          | 4                   | 5             |
| ...je me suis senti(e) plein(e) d'énergie et vigoureux(se)      | 0      | 1                 | 2                           | 3                          | 4                   | 5             |
| ...je me suis réveillé(e) en me sentant frais(che) et dispos(e) | 0      | 1                 | 2                           | 3                          | 4                   | 5             |
| ...ma vie quotidienne a été remplie de choses intéressantes     | 0      | 1                 | 2                           | 3                          | 4                   | 5             |

21. jour : \_\_\_\_\_

Corps cétoniques (mg/dl):  0  5  15  40  80  160

- Régime :  800 kcal  1.200 kcal  1.800 kcal  
suppléments :  non  poisson  
 autre : \_\_\_\_\_
- Jour de repos digestif :  riz  pommes de terre/légumes  
 fruits  autre : \_\_\_\_\_
- Jeûne : miel  non  oui  
midi : jus (¼l)  non  oui  
bouillon (¼l)  non  oui  
soir : bouillon (¼l)  non  oui  
suppléments:  non  Kousmine  Kousmine vegan  
 yoghourt  décoction d'avoine  
 décoction de riz  jus de carotte  
 thé vert  thé noir  
 autre : \_\_\_\_\_
- Rupture du jeûne
- Jour de réalimentation :  1  2  3  4

Votre état de santé physique :

très mauvais 

|   |   |   |   |   |   |   |   |   |   |    |
|---|---|---|---|---|---|---|---|---|---|----|
| 0 | 1 | 2 | 3 | 4 | 5 | 6 | 7 | 8 | 9 | 10 |
|---|---|---|---|---|---|---|---|---|---|----|

 excellent

Votre état de santé émotionnelle :

très mauvais 

|   |   |   |   |   |   |   |   |   |   |    |
|---|---|---|---|---|---|---|---|---|---|----|
| 0 | 1 | 2 | 3 | 4 | 5 | 6 | 7 | 8 | 9 | 10 |
|---|---|---|---|---|---|---|---|---|---|----|

 excellent



**Symptômes depuis l'arrivée à la clinique:**  non  oui

- |                                                                       |                                               |
|-----------------------------------------------------------------------|-----------------------------------------------|
| <input type="checkbox"/> maux de tête                                 | <input type="checkbox"/> douleurs musculaires |
| <input type="checkbox"/> trouble du sommeil                           | <input type="checkbox"/> brûlures d'estomac   |
| <input type="checkbox"/> haleine chargée<br>(demandez à l'infirmière) | <input type="checkbox"/> nausée               |
| <input type="checkbox"/> fatigue                                      | <input type="checkbox"/> bouche sèche         |
| <input type="checkbox"/> mal de dos                                   | <input type="checkbox"/> crampe au mollet     |
| <input type="checkbox"/> frilosité                                    | <input type="checkbox"/> diarrhée             |
| <input type="checkbox"/> vertige                                      | <input type="checkbox"/> jambes sans repos    |
| <input type="checkbox"/> faim                                         | <input type="checkbox"/> constipation         |
| <input type="checkbox"/> éruption cutanée                             | <input type="checkbox"/> palpitations         |
| <input type="checkbox"/> ballonnements                                | <input type="checkbox"/> troubles de la vue   |
| <input type="checkbox"/> autres: _____                                | <input type="checkbox"/> envie de manger      |

**Aujourd'hui ...**

|                                                                 | jamais | de temps en temps | moins de la moitié du temps | plus de la moitié du temps | la plupart du temps | tout le temps |
|-----------------------------------------------------------------|--------|-------------------|-----------------------------|----------------------------|---------------------|---------------|
| ...je me suis senti(e) bien et de bonne humeur                  | 0      | 1                 | 2                           | 3                          | 4                   | 5             |
| ...je me suis senti(e) calme et tranquille                      | 0      | 1                 | 2                           | 3                          | 4                   | 5             |
| ...je me suis senti(e) plein(e) d'énergie et vigoureux(se)      | 0      | 1                 | 2                           | 3                          | 4                   | 5             |
| ...je me suis réveillé(e) en me sentant frais(che) et dispos(e) | 0      | 1                 | 2                           | 3                          | 4                   | 5             |
| ...ma vie quotidienne a été remplie de choses intéressantes     | 0      | 1                 | 2                           | 3                          | 4                   | 5             |

22. jour : \_\_\_\_\_

Corps cétoniques (mg/dl):     0     5     15     40     80     160

Régime :     800 kcal     1.200 kcal     1.800 kcal

suppléments :     non     poisson

autre : \_\_\_\_\_

Jour de repos     riz     pommes de terre/légumes

digestif :     fruits     autre : \_\_\_\_\_

Jeûne :    miel     non     oui

midi :    jus (¼l)     non     oui

          bouillon (¼l)     non     oui

soir :    bouillon (¼l)     non     oui

suppléments:     non     Kousmine     Kousmine vegan  
                           yoghourt     décoction d'avoine  
                           décoction de riz     jus de carotte  
                           thé vert     thé noir  
                           autre : \_\_\_\_\_

Rupture du jeûne

Jour de réalimentation :     1     2     3     4

Votre état de santé physique :

très mauvais

|   |   |   |   |   |   |   |   |   |   |    |
|---|---|---|---|---|---|---|---|---|---|----|
| 0 | 1 | 2 | 3 | 4 | 5 | 6 | 7 | 8 | 9 | 10 |
|---|---|---|---|---|---|---|---|---|---|----|

excellent

Votre état de santé émotionnelle :

très mauvais

|   |   |   |   |   |   |   |   |   |   |    |
|---|---|---|---|---|---|---|---|---|---|----|
| 0 | 1 | 2 | 3 | 4 | 5 | 6 | 7 | 8 | 9 | 10 |
|---|---|---|---|---|---|---|---|---|---|----|

excellent

**Symptômes depuis l'arrivée à la clinique:**  non  oui

- |                                                                       |                                               |
|-----------------------------------------------------------------------|-----------------------------------------------|
| <input type="checkbox"/> maux de tête                                 | <input type="checkbox"/> douleurs musculaires |
| <input type="checkbox"/> trouble du sommeil                           | <input type="checkbox"/> brûlures d'estomac   |
| <input type="checkbox"/> haleine chargée<br>(demandez à l'infirmière) | <input type="checkbox"/> nausée               |
| <input type="checkbox"/> fatigue                                      | <input type="checkbox"/> bouche sèche         |
| <input type="checkbox"/> mal de dos                                   | <input type="checkbox"/> crampe au mollet     |
| <input type="checkbox"/> frilosité                                    | <input type="checkbox"/> diarrhée             |
| <input type="checkbox"/> vertige                                      | <input type="checkbox"/> jambes sans repos    |
| <input type="checkbox"/> faim                                         | <input type="checkbox"/> constipation         |
| <input type="checkbox"/> éruption cutanée                             | <input type="checkbox"/> palpitations         |
| <input type="checkbox"/> ballonnements                                | <input type="checkbox"/> troubles de la vue   |
| <input type="checkbox"/> autres: _____                                | <input type="checkbox"/> envie de manger      |

**Aujourd'hui ...**

|                                                                 | jamais | de temps en temps | moins de la moitié du temps | plus de la moitié du temps | la plupart du temps | tout le temps |
|-----------------------------------------------------------------|--------|-------------------|-----------------------------|----------------------------|---------------------|---------------|
| ...je me suis senti(e) bien et de bonne humeur                  | 0      | 1                 | 2                           | 3                          | 4                   | 5             |
| ...je me suis senti(e) calme et tranquille                      | 0      | 1                 | 2                           | 3                          | 4                   | 5             |
| ...je me suis senti(e) plein(e) d'énergie et vigoureux(se)      | 0      | 1                 | 2                           | 3                          | 4                   | 5             |
| ...je me suis réveillé(e) en me sentant frais(che) et dispos(e) | 0      | 1                 | 2                           | 3                          | 4                   | 5             |
| ...ma vie quotidienne a été remplie de choses intéressantes     | 0      | 1                 | 2                           | 3                          | 4                   | 5             |

## Questions à la fin du séjour

- 1) Présentez-vous un problème de santé majeur au début de votre séjour ?

non

oui, lequel ? \_\_\_\_\_

Comment ce problème de santé majeur a-t'il évolué au cours du séjour ?

grave péjoration

|   |   |   |   |   |   |   |
|---|---|---|---|---|---|---|
| 1 | 2 | 3 | 4 | 5 | 6 | 7 |
|---|---|---|---|---|---|---|

très grande  
amélioration

- 2) Comment avez-vous ressenti votre jeûne ou votre régime basse calorie pendant votre séjour:

un calvaire

|   |   |   |   |   |   |   |
|---|---|---|---|---|---|---|
| 1 | 2 | 3 | 4 | 5 | 6 | 7 |
|---|---|---|---|---|---|---|

une expérience  
magnifique

- 3) Comparez votre séjour ici à un autre type de vacances. Buchinger Wilhelmi est:

moins relaxant

également relaxant

plus relaxant

- 4) La durée de votre séjour fut:

trop courte

adéquate

trop longue

- 5) Au moment de l'interruption du jeûne, auriez-vous eu envie de continuer à jeûner ?

oui

non

# Style de vie – pendant la durée de votre séjour

Niveau de stress/relaxation :

état de tension  
extrême

|   |   |   |   |   |   |   |   |   |   |    |
|---|---|---|---|---|---|---|---|---|---|----|
| 0 | 1 | 2 | 3 | 4 | 5 | 6 | 7 | 8 | 9 | 10 |
|---|---|---|---|---|---|---|---|---|---|----|

totalem  
relaxé

**Nicotine :**  non  cigarettes/jour:

non  cigares/jour:

**Alcool :**  non  bière : verre (0,5 l)/semaine:

non  vin : verre (0,25 l)/semaine:

non  alcool fort : verre (2 cl)/semaine:

**Café :**  non  tasse/jour:

**Médias :**  non  smart-phone (h/semaine):

non  télévision (h/semaine):

non  ordinateur (h/semaine):

**Exercice physique :**  non  oui : h/semaine:   ,

**Au cours des  
dernières semaines ...**

|                                                                 | jamais | de temps en temps | moins de la moitié du temps | plus de la moitié du temps | la plupart du temps | tout le temps |
|-----------------------------------------------------------------|--------|-------------------|-----------------------------|----------------------------|---------------------|---------------|
| ...je me suis senti(e) bien et de bonne humeur                  | 0      | 1                 | 2                           | 3                          | 4                   | 5             |
| ...je me suis senti(e) calme et tranquille                      | 0      | 1                 | 2                           | 3                          | 4                   | 5             |
| ...je me suis senti(e) plein(e) d'énergie et vigoureux(se)      | 0      | 1                 | 2                           | 3                          | 4                   | 5             |
| ...je me suis réveillé(e) en me sentant frais(che) et dispos(e) | 0      | 1                 | 2                           | 3                          | 4                   | 5             |
| ...ma vie quotidienne a été remplie de choses intéressantes     | 0      | 1                 | 2                           | 3                          | 4                   | 5             |

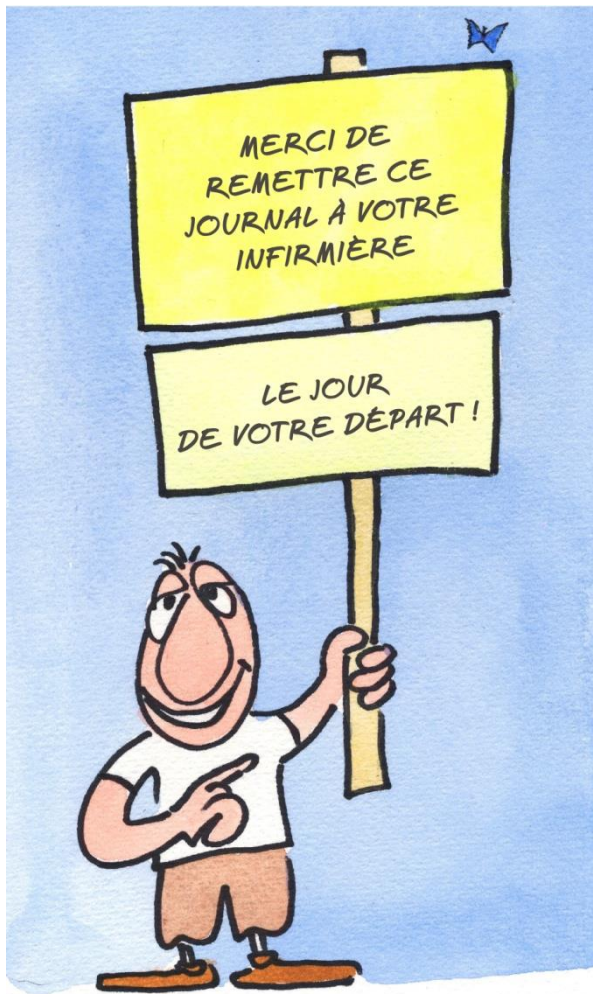

**Les réponses à ces questions ne sont pas indispensables pour notre documentation scientifique mais aident Buchinger Wilhelmi à améliorer ses prestations :**

Comment avez-vous trouvé le pensum quotidien de remplir ce « journal d'observation personnelle » ?

Auriez-vous des propositions d'amélioration ?

Est-ce que le séjour à répondu à votre attente ?

Pensez-vous que votre séjour va influencer votre vie et dans quel(s) domaine(s) ?

Notre service « Feel well after Buchinger Wilhelmi » offre par Skype la possibilité de parler avec une nutritionniste si vous le désirez.

E-mail : [nutrition@buchinger-wilhelmi.com](mailto:nutrition@buchinger-wilhelmi.com)

Merci beaucoup et à bientôt !

Nous vous écrirons par email dans deux semaines, trois et onze mois pour prendre de vos nouvelles.

Bon retour chez vous !

Follow up Buchinger Wilhelmi
