# Supplementary material for: Safety, health improvement and well-being during a 4 to 21-day fasting period in an observational study including 1422 subjects
Source: PLoS One. 2019 Jan 2;14(1):e0209353. doi: 10.1371/journal.pone.0209353 (PMC6314618; doi:10.1371/journal.pone.0209353)
Supplement: S4 Table — Changes in systolic and diastolic blood pressure according to the fasting length. (XLSX) [file pone.0209353.s004.xlsx]

## Sheet: Tabelle1
S4 Table. Raw data of Fig 3. Changes in Systolic and Diastolic Blood Pressure according to the fasting length.
patient number	sex	length of fast (days)	group	SBP (mmHg) pre	SBP (mmHg) post	SBP change (mmHg)	DBP (mmHg) pre	DBP (mmHg) post	DBP change (mmHg)
1	F	6	F5d	130	146	16	80	93	13
2	F	11	F10d	121	114	-7	67	63	-4
3	F	6	F5d		122			72
4	F	6	F5d	162	154	-8	102	94	-8
5	F	5	F5d	152	118	-34	90	82	-8
6	F	6	F5d	107			68
7	F	9	F10d	142	126	-16	101	83	-18
8	M	6	F5d	178	125	-53	104	80	-24
9	M	8	F10d	147	114	-33	93	90	-3
10	M	6	F5d	110	121	11	70	82	12
11	F	9	F10d	149	111	-38	75	72	-3
12	F	9	F10d	114	124	10	67	59	-8
13	F	8	F10d	162	140	-22	99	93	-6
14	F	9	F10d	108	137	29	75	82	7
15	F	8	F10d	128	119	-9	82	79	-3
16	M	8	F10d	118	111	-7	78	75	-3
17	F	8	F10d	145	123	-22	85	64	-21
18	F	6	F5d	156	146	-10	71	78	7
19	F	5	F5d	114	110	-4	78	70	-8
20	M	5	F5d	124	119	-5	81	76	-5
21	F	5	F5d	164	122	-42	94	75	-19
22	M	5	F5d	139	130	-9	90	80	-10
23	M	5	F5d	128	130	2	94	85	-9
24	F	9	F10d	132	109	-23	75	53	-22
25	F	5	F5d	102	117	15	74	77	3
26	M	5	F5d	110	106	-4	85	69	-16
27	M	15	F15d	126	98	-28	87	79	-8
28	F	4	F5d	106	108	2	69	67	-2
29	F	8	F10d	115	120	5	79	68	-11
30	M	17	F15d	163	136	-27	109	83	-26
31	M	12	F10d	122	135	13	85	82	-3
32	F	10	F10d	106	96	-10	69	70	1
33	M	9	F10d	122	83	-39	78	69	-9
34	F	10	F10d	117	128	11	72	77	5
35	F	6	F5d	106	106	0	70	64	-6
36	F	5	F5d	120	126	6	80	78	-2
37	M	7	F5d	139	122	-17	100	79	-21
38	F	6	F5d	137	124	-13	64	74	10
39	F	8	F10d	106	90	-16	65	62	-3
40	F	14	F15d	155	127	-28	98	78	-20
41	F	14	F15d	127	104	-23	70	74	4
42	M	8	F10d	113	122	9	72	76	4
43	F	8	F10d	108	115	7	70	70	0
44	F	15	F15d	114	106	-8	78	66	-12
45	M	7	F5d	151	134	-17	93	93	0
46	F	19	F20d	131	103	-28	93	86	-7
47	M	8	F10d	133	142	9	84	90	6
48	F	10	F10d	138	109	-29	96	80	-16
49	M	8	F10d	133	121	-12	101	74	-27
50	M	9	F10d	141	118	-23	86	77	-9
51	M	5	F5d	131	122	-9	82	74	-8
52	F	14	F15d	163	146	-17	96	91	-5
53	F	14	F15d	183	133	-50	112	90	-22
54	F	5	F5d	130	114	-16	74	70	-4
55	M	5	F5d	155	158	3	99	89	-10
56	M	9	F10d	131	131	0	97	86	-11
57	M	5	F5d	166	161	-5	99	82	-17
58	M	5	F5d	145	116	-29	85	64	-21
59	F	9	F10d	128	104	-24	85	65	-20
60	M	14	F15d	144	118	-26	65	83	18
61	M	7	F5d	120	110	-10	80	80	0
62	M	8	F10d	159	135	-24	93	97	4
63	F	9	F10d	136	134	-2	98	73	-25
64	F	14	F15d	105	103	-2	70	62	-8
65	F	14	F15d	126	124	-2	62	70	8
66	M	14	F15d	184	152	-32	85	86	1
67	M	9	F10d	145	142	-3	80	89	9
68	F	14	F15d	146	110	-36	87	70	-17
69	M	14	F15d	138	134	-4	71	65	-6
70	F	8	F10d	130	106	-24	90	80	-10
71	M	5	F5d	87	127	40	74	83	9
72	F	14	F15d	129	106	-23	75	77	2
73	F	14	F15d	113	118	5	77	76	-1
74	M	8	F10d	138	121	-17	85	74	-11
75	M	5	F5d	74	118	44	68	76	8
76	M	8	F10d	124	114	-10	80	76	-4
77	F	5	F5d	160	155	-5	93	90	-3
78	F	5	F5d	103	120	17	68	73	5
79	M	6	F5d	130	121	-9	80	75	-5
80	M	13	F15d	130	117	-13	84	84	0
81	F	9	F10d	107	101	-6	76	68	-8
82	F	8	F10d	146	150	4	76	86	10
83	F	18	F20d	135	104	-31	100	78	-22
84	F	10	F10d	106	90	-16	60	54	-6
85	M	5	F5d	129	121	-8	79	72	-7
86	M	4	F5d	128	126	-2	85	91	6
87	F	8	F10d	122	110	-12	70	70	0
88	M	10	F10d	170	123	-47	150	83	-67
89	M	14	F15d	131	95	-36	78	65	-13
90	F	8	F10d	150	151	1	88	78	-10
91	F	5	F5d	186	170	-16	109	106	-3
92	F	5	F5d	131	114	-17	59	70	11
93	M	5	F5d	183	171	-12	97	93	-4
94	M	8	F10d	146	110	-36	79	66	-13
95	F	6	F5d		147			96
96	F	13	F15d	127	128	1	79	93	14
97	M	8	F10d	158	143	-15	103	94	-9
98	F	7	F5d	104	96	-8	90	71	-19
99	M	9	F10d	189	139	-50	112	94	-18
100	F	9	F10d	92	76	-16	70	54	-16
101	F	6	F5d		116			71
102	F	9	F10d	126	113	-13	90	75	-15
103	F	9	F10d	116	119	3	78	69	-9
104	F	13	F15d	131	145	14	80	86	6
105	M	13	F15d	146	121	-25	85	70	-15
106	F	5	F5d	130	135	5	83	82	-1
107	F	6	F5d	106			71
108	F	5	F5d	163	134	-29	100	86	-14
109	M	14	F15d	111	118	7	75	68	-7
110	F	6	F5d		126			85
111	M	7	F5d	137	128	-9	88	81	-7
112	F	7	F5d	132	113	-19	88	90	2
113	M	6	F5d	164	122	-42	89	81	-8
114	M	5	F5d	130	118	-12	81	87	6
115	F	5	F5d	126	121	-5	90	83	-7
116	F	9	F10d	124	119	-5	82	74	-8
117	M	5	F5d	132	118	-14	74	83	9
118	M	7	F5d	134	111	-23	92	74	-18
119	F	5	F5d	86	107	21	56	67	11
120	M	4	F5d	121	118	-3	74	70	-4
121	F	5	F5d	98	104	6	70	69	-1
122	M	7	F5d	145			100
123	F	5	F5d	172	159	-13	93	95	2
124	M	7	F5d	98	117	19	78	78	0
125	M	7	F5d	133	107	-26	93	90	-3
126	M	14	F15d	139	113	-26	94	84	-10
127	F	4	F5d	130	130	0	79	75	-4
128	F	7	F5d	126	126	0	87	82	-5
129	F	5	F5d	150	111	-39	90	62	-28
130	F	14	F15d	135	135	0	89	86	-3
131	M	5	F5d	105	104	-1	78	79	1
132	F	5	F5d	99	118	19	71	78	7
133	M	14	F15d	146	147	1	89	83	-6
134	F	10	F10d	101	90	-11	70	58	-12
135	F	14	F15d	158	111	-47	85	70	-15
136	M	8	F10d	145	138	-7	87	90	3
137	F	8	F10d	150	136	-14	98	97	-1
138	M	6	F5d	159	136	-23	94	94	0
139	M	5	F5d	150	122	-28	98	77	-21
140	F	6	F5d	111	109	-2	73	74	1
141	F	13	F15d	119	120	1	82	86	4
142	F	11	F10d	154	120	-34	109	85	-24
143	F	11	F10d	146	99	-47	98	72	-26
144	F	10	F10d	109	110	1	72	67	-5
145	M	21	F20d	142	114	-28	92	68	-24
146	F	14	F15d	166	148	-18	89	81	-8
147	M	5	F5d	130	121	-9	90	87	-3
148	F	6	F5d	127	113	-14	74	77	3
149	M	5	F5d	130	143	13	91	97	6
150	M	14	F15d	120	148	28	76	90	14
151	F	10	F10d	178	126	-52	98	75	-23
152	F	21	F20d	165	127	-38	102	78	-24
153	M	8	F10d	130	131	1	83	83	0
154	M	7	F5d	132	122	-10	82	85	3
155	F	6	F5d	122	105	-17	64	70	6
156	M	6	F5d	141	143	2	102	98	-4
157	F	5	F5d	110	100	-10	67	54	-13
158	F	14	F15d	115	107	-8	78	86	8
159	F	5	F5d	102	97	-5	58	60	2
160	F	5	F5d	131	110	-21	70	83	13
161	F	4	F5d	113	130	17	77	89	12
162	F	9	F10d	120	104	-16	70	74	4
163	F	18	F20d	112	103	-9	77	66	-11
164	M	14	F15d	160	127	-33	90	82	-8
165	F	14	F15d	138	105	-33	86	76	-10
166	F	14	F15d	142	112	-30	109	82	-27
167	F	5	F5d	106	115	9	79	78	-1
168	F	6	F5d	108	112	4	70	69	-1
169	M	9	F10d	206	150	-56	82	84	2
170	F	9	F10d		125			89
171	M	8	F10d	142	130	-12	98	87	-11
172	F	6	F5d	126	126	0	82	85	3
173	F	8	F10d	142	118	-24	82	79	-3
174	F	14	F15d	80	112	32	75	57	-18
175	M	7	F5d	158	138	-20	89	88	-1
176	F	9	F10d	130	96	-34	78	65	-13
177	F	4	F5d	101	106	5	67	62	-5
178	F	8	F10d	126	110	-16	83	73	-10
179	F	8	F10d	104	110	6	71	66	-5
180	F	14	F15d	140	134	-6	78	86	8
181	M	14	F15d	130	114	-16	91	70	-21
182	M	4	F5d	132	119	-13	82	71	-11
183	M	4	F5d	116	113	-3	68	73	5
184	F	6	F5d	146	121	-25	102	87	-15
185	M	7	F5d	134	122	-12	102	90	-12
186	F	5	F5d	140	122	-18	78	68	-10
187	F	5	F5d	121	105	-16	88	73	-15
188	M	19	F20d	144	136	-8	69	75	6
189	F	7	F5d	114	113	-1	79	76	-3
190	M	6	F5d	130	113	-17	74	77	3
191	F	6	F5d	116	102	-14	81	74	-7
192	F	6	F5d		126			84
193	F	9	F10d	144	110	-34	94	75	-19
194	M	5	F5d	115	119	4	74	81	7
195	F	5	F5d	103	101	-2	75	69	-6
196	M	5	F5d	135	135	0	77	82	5
197	M	9	F10d	122	98	-24	67	66	-1
198	F	12	F10d	138	120	-18	66	80	14
199	M	21	F20d	129	111	-18	90	94	4
200	M	10	F10d	146	149	3	82	87	5
201	F	5	F5d	126	118	-8	83	82	-1
202	F	13	F15d	109	106	-3	76	70	-6
203	F	6	F5d		105			71
204	M	6	F5d	157	133	-24	96	89	-7
205	F	8	F10d	105	118	13	65	88	23
206	F	8	F10d	126	122	-4	84	82	-2
207	F	8	F10d	122	149	27	80	100	20
208	M	7	F5d	122	158	36	70	90	20
209	F	13	F15d	130	126	-4	78	79	1
210	F	9	F10d	123	122	-1	70	68	-2
211	F	10	F10d	126	106	-20	78	77	-1
212	F	14	F15d	130	110	-20	90	73	-17
213	F	14	F15d	123	111	-12	70	78	8
214	M	14	F15d	146	126	-20	81	82	1
215	F	9	F10d		103			77
216	M	8	F10d	131	112	-19	104	84	-20
217	F	9	F10d	121	114	-7	85	78	-7
218	M	7	F5d	121	117	-4	82	76	-6
219	F	21	F20d	172	128	-44	112	86	-26
220	F	7	F5d	110	105	-5	74	70	-4
221	F	15	F15d	122	134	12	77	81	4
222	M	14	F15d	130	126	-4	83	75	-8
223	M	5	F5d	133	134	1	90	89	-1
224	M	5	F5d	166	155	-11	86	80	-6
225	M	10	F10d	133	113	-20	90	79	-11
226	F	11	F10d	128	123	-5	80	81	1
227	M	11	F10d	117	132	15	84	83	-1
228	M	12	F10d	122	116	-6	64	64	0
229	M	10	F10d	127	108	-19	78	90	12
230	F	10	F10d	94	116	22	75	70	-5
231	F	6	F5d	142	130	-12	84	83	-1
232	M	6	F5d	144	133	-11	84	84	0
233	M	4	F5d
234	M	9	F10d		115			81
235	M	5	F5d	116	130	14	82	79	-3
236	F	10	F10d	122	108	-14	81	64	-17
237	F	10	F10d		123			79
238	M	6	F5d	135	147	12	84	96	12
239	M	8	F10d	166	114	-52	99	73	-26
240	M	11	F10d	127	118	-9	90	79	-11
241	M	5	F5d	113	119	6	69	74	5
242	F	5	F5d	122	121	-1	77	75	-2
243	M	5	F5d	142	118	-24	90	75	-15
244	F	5	F5d	107	114	7	79	78	-1
245	M	5	F5d	111	111	0	78	72	-6
246	F	6	F5d	98	106	8	63	70	7
247	F	8	F10d	146	144	-2	102	92	-10
248	M	5	F5d		153			91
249	M	9	F10d	152	126	-26	72	62	-10
250	M	9	F10d	114	118	4	86	82	-4
251	M	5	F5d	127	114	-13	82	82	0
252	F	5	F5d	110	106	-4	67	62	-5
253	F	9	F10d	80	134	54	81	86	5
254	F	9	F10d	143	102	-41	78	74	-4
255	M	21	F20d	137	134	-3	79	80	1
256	M	6	F5d	143	130	-13	90	75	-15
257	M	8	F10d	114	127	13	78	79	1
258	F	8	F10d	105	119	14	92	81	-11
259	F	12	F10d	152	128	-24	101	72	-29
260	F	16	F15d	106	109	3	72	66	-6
261	F	5	F5d	135	117	-18	82	75	-7
262	F	14	F15d		118			68
263	F	9	F10d	159	142	-17	102	85	-17
264	F	9	F10d	132	127	-5	93	85	-8
265	M	14	F15d	115	112	-3	69	75	6
266	F	8	F10d	127	105	-22	74	74	0
267	F	16	F15d	142	144	2	89	76	-13
268	F	14	F15d	170			98
269	F	9	F10d	107	94	-13	70	65	-5
270	F	8	F10d	123	114	-9	89	76	-13
271	M	8	F10d	126	117	-9	82	80	-2
272	M	8	F10d	130	110	-20	94	80	-14
273	F	6	F5d	106	113	7	79	84	5
274	M	5	F5d		153			97
275	M	8	F10d	148	123	-25	97	90	-7
276	F	8	F10d	136			89
277	F	6	F5d	166	129	-37	92	80	-12
278	M	13	F15d	140	140	0	90	89	-1
279	M	8	F10d	169	141	-28	100	94	-6
280	F	8	F10d	119	123	4	86	77	-9
281	M	14	F15d	154	142	-12	95	95	0
282	F	14	F15d	158	142	-16	86	83	-3
283	M	14	F15d	155	118	-37	88	77	-11
284	F	8	F10d	121	109	-12	89	74	-15
285	M	8	F10d	135	120	-15	94	77	-17
286	M	6	F5d	127	132	5	78	76	-2
287	M	6	F5d	141	136	-5	85	91	6
288	F	6	F5d	90	110	20	66	70	4
289	F	5	F5d	134	133	-1	82	89	7
290	M	14	F15d	150	133	-17	102	94	-8
291	F	14	F15d	150	126	-24	75	80	5
292	M	8	F10d	135	110	-25	80	68	-12
293	M	6	F5d	124	129	5	85	74	-11
294	M	6	F5d	162	142	-20	107	94	-13
295	F	5	F5d	142	128	-14	91	82	-9
296	M	5	F5d	139	135	-4	87	82	-5
297	M	13	F15d	137	115	-22	90	74	-16
298	F	12	F10d	156	142	-14	113	89	-24
299	M	8	F10d	126	138	12	86	76	-10
300	M	10	F10d	127	114	-13	71	76	5
301	F	5	F5d	165	146	-19	82	71	-11
302	F	9	F10d	130	107	-23	80	82	2
303	F	5	F5d		106			70
304	M	5	F5d	150	150	0	88	86	-2
305	F	5	F5d	141	118	-23	94	85	-9
306	F	4	F5d	102	86	-16	66	61	-5
307	M	8	F10d	110	112	2	70	72	2
308	F	9	F10d	110	118	8	64	69	5
309	M	8	F10d	148	122	-26	74	66	-8
310	M	8	F10d	163	150	-13	108	90	-18
311	M	8	F10d	126	110	-16	96	67	-29
312	M	14	F15d	177	143	-34	94	82	-12
313	F	8	F10d	106	108	2	78	66	-12
314	M	7	F5d	114	128	14	66	72	6
315	F	7	F5d	139	114	-25	83	65	-18
316	F	8	F10d	146	126	-20	87	79	-8
317	F	5	F5d	110	110	0	90	74	-16
318	M	5	F5d	129	126	-3	80	84	4
319	M	5	F5d	143	130	-13	94	78	-16
320	F	5	F5d	160	166	6	123	104	-19
321	F	8	F10d	108	98	-10	67	53	-14
322	M	8	F10d		116			72
323	M	5	F5d	114	116	2	74	74	0
324	M	7	F5d	127			94
325	F	7	F5d	142	122	-20	91	86	-5
326	F	7	F5d	119	111	-8	88	80	-8
327	F	7	F5d	116	110	-6	79	84	5
328	F	5	F5d	124	125	1	83	78	-5
329	F	12	F10d	123	87	-36	89	57	-32
330	M	5	F5d	164	138	-26	103	86	-17
331	F	10	F10d	130	119	-11	80	78	-2
332	F	9	F10d	156	148	-8	81	82	1
333	F	8	F10d	130	119	-11	74	71	-3
334	M	8	F10d	135	129	-6	91	72	-19
335	F	5	F5d	118	106	-12	75	72	-3
336	F	4	F5d	117	104	-13	67	66	-1
337	M	5	F5d	152	112	-40	81	70	-11
338	F	7	F5d	116	102	-14	70	77	7
339	F	8	F10d	162	130	-32	101	85	-16
340	M	7	F5d	142	128	-14	86	76	-10
341	F	6	F5d	150	106	-44	90	73	-17
342	F	5	F5d	122	94	-28	77	66	-11
343	F	5	F5d	115	109	-6	83	63	-20
344	F	5	F5d	134	111	-23	86	86	0
345	F	7	F5d	190	149	-41	111	97	-14
346	F	8	F10d	134	131	-3	84	70	-14
347	M	8	F10d	106	120	14	86	78	-8
348	F	7	F5d	125	131	6	90	86	-4
349	M	8	F10d	127	130	3	88	82	-6
350	M	5	F5d	119	107	-12	67	72	5
351	M	5	F5d	121	132	11	81	78	-3
352	F	5	F5d	158	154	-4	98	91	-7
353	F	8	F10d	122	106	-16	83	75	-8
354	F	8	F10d	110	103	-7	68	95	27
355	M	11	F10d	149	121	-28	82	68	-14
356	M	6	F5d	136	160	24	94	108	14
357	F	4	F5d	119	128	9	78	79	1
358	F	8	F10d	114	94	-20	94	61	-33
359	M	6	F5d	130	144	14	86	94	8
360	F	5	F5d	112	94	-18	69	64	-5
361	F	5	F5d	132	110	-22	77	76	-1
362	M	6	F5d	134	142	8	91	95	4
363	F	5	F5d	146	146	0	95	99	4
364	F	8	F10d	114	109	-5	73	66	-7
365	M	8	F10d	142	116	-26	90	79	-11
366	F	5	F5d	118	108	-10	66	66	0
367	M	8	F10d	168	146	-22	114	78	-36
368	M	14	F15d	159	137	-22	94	80	-14
369	F	10	F10d	149	132	-17	94	81	-13
370	F	16	F15d	133	121	-12	88	84	-4
371	F	8	F10d	108	105	-3	64	59	-5
372	M	5	F5d	193	151	-42	136	93	-43
373	F	4	F5d	126	125	-1	86	98	12
374	M	5	F5d	200	195	-5	110	90	-20
375	F	4	F5d	117	110	-7	75	81	6
376	F	4	F5d	125	111	-14	84	65	-19
377	F	5	F5d	146	124	-22	87	88	1
378	F	8	F10d	148	118	-30	90	96	6
379	M	7	F5d	135	111	-24	84	70	-14
380	M	5	F5d	150	138	-12	87	82	-5
381	M	8	F10d	177	136	-41	82	80	-2
382	F	8	F10d	143	97	-46	71	70	-1
383	F	5	F5d	121	114	-7	68	70	2
384	M	8	F10d	146	122	-24	92	83	-9
385	M	7	F5d	110	114	4	81	73	-8
386	M	6	F5d	84	143	59	90	81	-9
387	M	6	F5d	162	140	-22	114	90	-24
388	M	5	F5d	113	126	13	67	73	6
389	F	11	F10d	126	122	-4	88	82	-6
390	M	6	F5d	113	114	1	73	74	1
391	F	7	F5d	108	106	-2	73	69	-4
392	M	5	F5d	122	116	-6	82	77	-5
393	F	6	F5d	114	114	0	89	77	-12
394	F	6	F5d	119	111	-8	81	77	-4
395	M	18	F20d	160	138	-22	90	84	-6
396	F	5	F5d	117	122	5	81	90	9
397	M	5	F5d	153	146	-7	108	110	2
398	F	8	F10d	150	142	-8	82	82	0
399	F	8	F10d	141	132	-9	92	85	-7
400	F	8	F10d	106	98	-8	72	71	-1
401	M	9	F10d	134	122	-12	97	91	-6
402	M	8	F10d	146	154	8	84	91	7
403	F	8	F10d	151	108	-43	74	70	-4
404	M	8	F10d	157	130	-27	100	93	-7
405	F	9	F10d	137	106	-31	90	67	-23
406	M	8	F10d	165	162	-3	103	90	-13
407	F	6	F5d	122	112	-10	84	71	-13
408	F	8	F10d	142	94	-48	96	74	-22
409	M	9	F10d	149	155	6	96	81	-15
410	F	5	F5d	117	122	5	75	84	9
411	F	7	F5d	142	140	-2	85	79	-6
412	M	8	F10d	161	127	-34	82	78	-4
413	F	6	F5d	125	92	-33	86	75	-11
414	F	10	F10d	126	146	20	76	76	0
415	M	9	F10d	138	137	-1	74	72	-2
416	M	7	F5d	140	122	-18	80	77	-3
417	M	5	F5d	136	126	-10	82	72	-10
418	F	6	F5d	153	150	-3	95	90	-5
419	F	5	F5d	119	112	-7	79	74	-5
420	F	5	F5d	121	110	-11	67	59	-8
421	M	16	F15d	130	107	-23	87	70	-17
422	F	5	F5d	141	123	-18	88	74	-14
423	F	5	F5d	104	102	-2	67	69	2
424	F	7	F5d	140	140	0	100	102	2
425	F	5	F5d	131	98	-33	66	64	-2
426	M	5	F5d	140	150	10	82	90	8
427	F	6	F5d	116	118	2	74	77	3
428	M	13	F15d	134	116	-18	98	82	-16
429	F	20	F20d	144	120	-24	96	80	-16
430	F	8	F10d	125	127	2	87	86	-1
431	F	11	F10d	139	143	4	80	88	8
432	F	8	F10d	135	129	-6	88	92	4
433	F	8	F10d	87	114	27	69	61	-8
434	F	8	F10d		126			71
435	M	10	F10d	112	106	-6	77	78	1
436	F	9	F10d	117	106	-11	74	74	0
437	F	9	F10d	112	108	-4	74	66	-8
438	F	10	F10d	122	100	-22	78	70	-8
439	M	12	F10d	142	126	-16	89	86	-3
440	M	13	F15d	128	122	-6	95	88	-7
441	M	4	F5d	194	149	-45	120	101	-19
442	F	6	F5d	189	171	-18	94	91	-3
443	F	6	F5d	131	124	-7	90	87	-3
444	M	6	F5d	116	115	-1	71	72	1
445	F	9	F10d	78	114	36	72	76	4
446	M	11	F10d	142	110	-32	86	83	-3
447	F	6	F5d	114	108	-6	81	73	-8
448	F	9	F10d	112	95	-17	68	58	-10
449	F	6	F5d	117	101	-16	86	76	-10
450	F	6	F5d	111	141	30	78	76	-2
451	M	8	F10d	118	107	-11	76	79	3
452	M	9	F10d	139	128	-11	86	74	-12
453	M	9	F10d		133			99
454	F	6	F5d	120	125	5	82	78	-4
455	M	7	F5d	142	115	-27	89	73	-16
456	M	6	F5d	130	151	21	88	107	19
457	F	6	F5d	155	142	-13	84	85	1
458	F	8	F10d		105			75
459	F	6	F5d	146	123	-23	85	87	2
460	F	6	F5d	114	132	18	86	76	-10
461	F	5	F5d	146	114	-32	78	66	-12
462	F	10	F10d	129	111	-18	104	96	-8
463	F	6	F5d	130	109	-21	80	79	-1
464	M	14	F15d	144	109	-35	89	77	-12
465	F	9	F10d	104	106	2	75	74	-1
466	M	9	F10d	135	141	6	82	89	7
467	M	7	F5d	117	122	5	68	74	6
468	F	7	F5d	118	110	-8	76	69	-7
469	F	9	F10d	160	138	-22	82	83	1
470	M	9	F10d	125	118	-7	77	75	-2
471	M	6	F5d	164	144	-20	96	83	-13
472	F	5	F5d	100	105	5	62	71	9
473	F	9	F10d	110	106	-4	71	66	-5
474	M	6	F5d	161	130	-31	99	90	-9
475	M	6	F5d	138	126	-12	88	79	-9
476	F	5	F5d	131	107	-24	94	70	-24
477	M	6	F5d	120	120	0	81	81	0
478	F	5	F5d	112	118	6	73	65	-8
479	F	5	F5d	116	118	2	71	70	-1
480	M	9	F10d	128	121	-7	80	78	-2
481	M	6	F5d		110			81
482	M	9	F10d	123	117	-6	78	68	-10
483	M	5	F5d	154	151	-3	86	90	4
484	F	6	F5d	100	98	-2	63	59	-4
485	M	6	F5d	118	105	-13	71	68	-3
486	M	6	F5d	128	123	-5	86	77	-9
487	F	8	F10d	98	99	1	62	62	0
488	F	5	F5d	135	114	-21	82	70	-12
489	F	8	F10d	102	105	3	67	62	-5
490	F	5	F5d	108	115	7	83	73	-10
491	F	5	F5d	157	133	-24	85	82	-3
492	F	8	F10d	146	112	-34	89	79	-10
493	F	8	F10d	150	132	-18	100	83	-17
494	F	5	F5d	130	120	-10	83	78	-5
495	F	8	F10d	118	122	4	82	67	-15
496	F	5	F5d	129	131	2	75	77	2
497	F	8	F10d	116	98	-18	79	74	-5
498	F	5	F5d	133	142	9	86	81	-5
499	F	8	F10d	113	89	-24	92	66	-26
500	F	8	F10d	153	143	-10	98	96	-2
501	M	5	F5d	121	111	-10	74	70	-4
502	M	5	F5d	114	122	8	99	69	-30
503	M	5	F5d	126	127	1	82	76	-6
504	F	14	F15d	126	113	-13	75	62	-13
505	F	8	F10d	108	122	14	76	90	14
506	F	8	F10d	136	124	-12	93	83	-10
507	M	14	F15d	145	132	-13	99	86	-13
508	F	6	F5d	129	140	11	78	93	15
509	M	5	F5d	126	146	20	74	73	-1
510	F	15	F15d	124	123	-1	76	80	4
511	M	5	F5d	155	130	-25	91	90	-1
512	M	5	F5d	110	118	8	68	66	-2
513	M	5	F5d	157	141	-16	116	95	-21
514	F	9	F10d	159	146	-13	78	90	12
515	F	9	F10d	74	102	28	78	63	-15
516	F	5	F5d	108	117	9	91	80	-11
517	F	6	F5d	194	158	-36	86	85	-1
518	M	8	F10d	122	120	-2	77	75	-2
519	M	5	F5d	166	169	3	95	99	4
520	F	5	F5d	138	116	-22	67	64	-3
521	F	9	F10d	162	160	-2	92	89	-3
522	F	8	F10d	118	94	-24	83	70	-13
523	M	8	F10d	207	151	-56	114	102	-12
524	F	5	F5d	130	114	-16	86	77	-9
525	F	6	F5d	150	107	-43	81	67	-14
526	M	9	F10d	114	124	10	67	76	9
527	M	14	F15d	139	113	-26	82	63	-19
528	M	5	F5d	118	125	7	72	74	2
529	M	21	F20d	154	122	-32	92	80	-12
530	F	5	F5d	214	152	-62	118	104	-14
531	M	8	F10d	139	134	-5	98	88	-10
532	M	6	F5d	132	128	-4	83	78	-5
533	F	14	F15d	103	95	-8	66	62	-4
534	M	6	F5d	134	142	8	92	94	2
535	M	9	F10d	126	114	-12	80	69	-11
536	F	5	F5d	106	95	-11	74	66	-8
537	M	14	F15d	146	133	-13	100	83	-17
538	M	14	F15d	107	108	1	69	68	-1
539	M	8	F10d	122	115	-7	80	67	-13
540	M	6	F5d	152	138	-14	90	83	-7
541	F	5	F5d	126	103	-23	81	71	-10
542	F	5	F5d	144	132	-12	89	82	-7
543	F	8	F10d	163	146	-17	93	84	-9
544	M	6	F5d		121			77
545	F	6	F5d	111	134	23	75	81	6
546	M	9	F10d	126	125	-1	70	79	9
547	F	8	F10d	105	106	1	66	70	4
548	F	5	F5d		123			72
549	M	5	F5d	132	129	-3	86	84	-2
550	F	5	F5d	134	111	-23	84	83	-1
551	F	5	F5d	137	122	-15	98	69	-29
552	M	5	F5d	176	183	7	98	84	-14
553	F	14	F15d	182	155	-27	101	86	-15
554	M	14	F15d	142	117	-25	80	73	-7
555	M	8	F10d	130	120	-10	76	73	-3
556	M	16	F15d		118			74
557	F	19	F20d	138	130	-8	85	79	-6
558	M	5	F5d	126	118	-8	78	77	-1
559	F	5	F5d	128	126	-2	81	77	-4
560	M	8	F10d		162			97
561	M	5	F5d	138	127	-11	87	102	15
562	M	7	F5d	118	125	7	80	91	11
563	F	5	F5d	114	120	6	76	78	2
564	F	8	F10d	158	138	-20	78	80	2
565	F	8	F10d	132	107	-25	77	61	-16
566	M	6	F5d	174	161	-13	83	78	-5
567	F	9	F10d	134	122	-12	87	78	-9
568	F	5	F5d	122	125	3	77	82	5
569	F	5	F5d	118	106	-12	86	77	-9
570	M	5	F5d	144	126	-18	86	90	4
571	M	5	F5d	115	117	2	70	65	-5
572	F	5	F5d	108	119	11	76	74	-2
573	M	8	F10d	130	126	-4	86	81	-5
574	F	5	F5d	134	136	2	78	73	-5
575	M	8	F10d	175	134	-41	87	86	-1
576	F	8	F10d	138	118	-20	81	79	-2
577	F	8	F10d	129	118	-11	70	82	12
578	F	8	F10d	102	90	-12	64	62	-2
579	M	8	F10d	127	126	-1	85	94	9
580	F	8	F10d	128	126	-2	86	90	4
581	M	9	F10d	128	122	-6	78	56	-22
582	M	5	F5d	142	147	5	94	91	-3
583	M	6	F5d	98	110	12	56	65	9
584	F	5	F5d	135	115	-20	87	78	-9
585	M	14	F15d	130	113	-17	84	83	-1
586	M	11	F10d	123	138	15	89	77	-12
587	F	14	F15d	160	123	-37	104	86	-18
588	M	11	F10d	138	120	-18	92	88	-4
589	F	8	F10d	119	108	-11	69	74	5
590	M	20	F20d	131	120	-11	90	75	-15
591	M	5	F5d	123	110	-13	78	83	5
592	M	9	F10d	140	138	-2	90	94	4
593	F	8	F10d	132	134	2	82	84	2
594	M	7	F5d	119	113	-6	84	75	-9
595	M	6	F5d	117	109	-8	78	71	-7
596	F	14	F15d	108	100	-8	68	64	-4
597	M	14	F15d	157	126	-31	108	89	-19
598	M	10	F10d	143	149	6	91	95	4
599	F	5	F5d	165	116	-49	103	79	-24
600	M	9	F10d	159	117	-42	90	69	-21
601	M	8	F10d	117	121	4	70	73	3
602	F	8	F10d	118	114	-4	71	70	-1
603	F	6	F5d	112	103	-9	74	62	-12
604	F	6	F5d	116	103	-13	70	70	0
605	F	5	F5d	104	110	6	66	67	1
606	F	14	F15d	122	127	5	83	74	-9
607	F	20	F20d	118	99	-19	82	67	-15
608	M	5	F5d		122			84
609	M	8	F10d	130	124	-6	76	70	-6
610	M	5	F5d	170	136	-34	101	89	-12
611	F	9	F10d		100			65
612	F	5	F5d	114	120	6	79	85	6
613	M	5	F5d	148	136	-12	98	103	5
614	M	21	F20d		122			83
615	F	21	F20d	132	108	-24	94	72	-22
616	M	8	F10d	130	116	-14	78	72	-6
617	F	8	F10d	149	123	-26	86	82	-4
618	F	8	F10d		100			65
619	M	20	F20d		124			90
620	M	5	F5d	132	148	16	77	94	17
621	M	14	F15d	145	110	-35	90	71	-19
622	M	8	F10d	170	130	-40	95	78	-17
623	M	14	F15d	135	108	-27	86	62	-24
624	F	8	F10d	137	114	-23	77	70	-7
625	F	10	F10d	108	103	-5	74	67	-7
626	F	14	F15d	109	114	5	71	74	3
627	M	5	F5d	118	106	-12	86	77	-9
628	F	14	F15d	157	138	-19	84	81	-3
629	M	5	F5d	129	130	1	93	86	-7
630	M	5	F5d	130	118	-12	85	72	-13
631	M	8	F10d	154	138	-16	90	79	-11
632	F	5	F5d	70	105	35	88	70	-18
633	F	6	F5d	102	110	8	63	70	7
634	F	5	F5d	135	140	5	73	78	5
635	F	21	F20d	151	127	-24	94	89	-5
636	M	6	F5d	112	129	17	62	82	20
637	F	21	F20d	162	129	-33	88	78	-10
638	M	8	F10d	114	131	17	74	77	3
639	M	6	F5d	125	126	1	101	87	-14
640	M	8	F10d	116	144	28	75	86	11
641	F	5	F5d	100	100	0	62	58	-4
642	F	5	F5d	131	114	-17	90	76	-14
643	M	5	F5d	138	122	-16	90	82	-8
644	M	8	F10d	114	113	-1	74	68	-6
645	F	6	F5d	130	112	-18	86	80	-6
646	M	6	F5d		140			80
647	M	5	F5d	185	142	-43	129	100	-29
648	F	8	F10d	117	109	-8	83	68	-15
649	M	14	F15d	128	114	-14	72	65	-7
650	F	14	F15d	114	86	-28	74	61	-13
651	F	5	F5d	143	120	-23	66	79	13
652	M	5	F5d	153	135	-18	94	87	-7
653	F	18	F20d	154	124	-30	90	87	-3
654	M	6	F5d	146	115	-31	85	70	-15
655	M	8	F10d	126	105	-21	78	64	-14
656	F	5	F5d	136	114	-22	84	74	-10
657	F	10	F10d	102	107	5	70	70	0
658	F	8	F10d	148	130	-18	86	81	-5
659	M	5	F5d	134	106	-28	94	78	-16
660	F	5	F5d	139	119	-20	95	91	-4
661	F	8	F10d	118	109	-9	85	68	-17
662	F	14	F15d	132	131	-1	82	73	-9
663	M	5	F5d	134	125	-9	99	90	-9
664	F	5	F5d	115	116	1	85	85	0
665	F	8	F10d	102	99	-3	73	73	0
666	M	5	F5d	121	121	0	75	90	15
667	M	5	F5d	132	126	-6	82	86	4
668	F	14	F15d	159	120	-39	95	78	-17
669	F	15	F15d	114	116	2	75	73	-2
670	F	7	F5d	132	150	18	81	83	2
671	M	15	F15d	147	134	-13	91	85	-6
672	F	6	F5d	135	122	-13	85	77	-8
673	M	8	F10d	132	122	-10	91	81	-10
674	F	14	F15d	136	116	-20	98	78	-20
675	M	6	F5d	132	130	-2	90	87	-3
676	M	15	F15d	158	139	-19	98	86	-12
677	F	6	F5d	126	137	11	86	90	4
678	F	5	F5d	98	98	0	66	76	10
679	M	5	F5d		113			78
680	F	8	F10d	114	106	-8	66	68	2
681	F	8	F10d	130	109	-21	84	70	-14
682	F	5	F5d	175	168	-7	98	101	3
683	M	8	F10d	130	122	-8	78	85	7
684	M	8	F10d	131	142	11	92	80	-12
685	F	8	F10d	82	91	9	53	58	5
686	M	8	F10d	114	102	-12	80	70	-10
687	M	5	F5d	122	123	1	80	77	-3
688	M	6	F5d	112	105	-7		69
689	F	5	F5d	107	99	-8	70	67	-3
690	F	15	F15d	109			74
691	F	13	F15d	118	121	3	70	78	8
692	F	7	F5d	113	96	-17	70	73	3
693	M	7	F5d	180	139	-41	108	98	-10
694	F	7	F5d	132	129	-3	73	76	3
695	F	9	F10d	121	115	-6	96	90	-6
696	M	9	F10d	118	119	1	78	80	2
697	F	5	F5d		98			66
698	F	10	F10d	114	106	-8	74	70	-4
699	F	8	F10d		104			68
700	F	8	F10d	151	121	-30	98	82	-16
701	F	4	F5d	144	123	-21	100	86	-14
702	F	5	F5d	99	122	23	72	86	14
703	M	8	F10d	110	118	8	70	83	13
704	M	6	F5d	118	103	-15	79	74	-5
705	M	5	F5d	126	137	11	79	98	19
706	M	8	F10d	103	106	3	66	70	4
707	F	9	F10d	120	119	-1	90	74	-16
708	F	8	F10d	116	126	10	82	76	-6
709	M	8	F10d	142	123	-19	78	79	1
710	F	5	F5d	179	120	-59	114	70	-44
711	F	9	F10d	102	106	4	59	54	-5
712	F	5	F5d	164	135	-29	103	82	-21
713	M	5	F5d	132	149	17	92	91	-1
714	F	8	F10d	140	98	-42	80	62	-18
715	F	4	F5d		119			95
716	F	14	F15d	129	117	-12	76	77	1
717	F	14	F15d	127	104	-23	74	90	16
718	M	13	F15d	128	129	1	83	78	-5
719	F	8	F10d		89			72
720	M	14	F15d	142	137	-5	89	81	-8
721	F	15	F15d	155	134	-21	111	88	-23
722	F	14	F15d	133	106	-27	83	75	-8
723	M	9	F10d	168	142	-26	77	75	-2
724	F	5	F5d	130	107	-23	88	69	-19
725	F	10	F10d	146	116	-30	98	87	-11
726	F	8	F10d	74	113	39	60	73	13
727	M	9	F10d	130	119	-11	82	78	-4
728	M	6	F5d	118	130	12	78	77	-1
729	M	6	F5d	130	138	8	82	78	-4
730	M	5	F5d		141			86
731	F	6	F5d	130	122	-8	92	83	-9
732	F	5	F5d	134	110	-24	88	80	-8
733	F	5	F5d	137	127	-10	87	67	-20
734	M	8	F10d	150	139	-11	98	93	-5
735	F	5	F5d	80	114	34	94	80	-14
736	F	5	F5d	104	103	-1	66	58	-8
737	F	5	F5d	102	91	-11	62	61	-1
738	F	6	F5d	118	111	-7	87	74	-13
739	M	4	F5d	138	142	4	94	94	0
740	M	9	F10d		120			78
741	M	8	F10d		114			72
742	F	5	F5d	114	105	-9	74	66	-8
743	F	8	F10d	100	108	8	68	71	3
744	M	5	F5d	174	130	-44	110	86	-24
745	F	8	F10d	163	124	-39	108	89	-19
746	F	5	F5d	97	93	-4	60	54	-6
747	F	14	F15d	116	113	-3	70	66	-4
748	F	14	F15d	142	105	-37	78	73	-5
749	F	5	F5d	126	130	4	91	88	-3
750	M	5	F5d	170	152	-18	95	95	0
751	F	5	F5d	110	127	17	82	88	6
752	F	5	F5d	114	114	0	73	84	11
753	F	5	F5d	133	126	-7	94	89	-5
754	M	10	F10d	119	107	-12	74	78	4
755	M	6	F5d		110			66
756	M	14	F15d		126			73
757	M	5	F5d	108	113	5	75	74	-1
758	M	10	F10d	125	109	-16	80	75	-5
759	F	14	F15d	167	137	-30	86	77	-9
760	M	8	F10d	119	126	7	74	81	7
761	M	5	F5d	109	124	15	73	79	6
762	F	8	F10d	98	104	6	70	74	4
763	F	8	F10d	108	105	-3	74	67	-7
764	M	9	F10d		98			68
765	F	5	F5d	126	111	-15	86	73	-13
766	F	8	F10d	137	125	-12	99	76	-23
767	M	8	F10d	152	112	-40	102	83	-19
768	F	8	F10d	118	102	-16	74	65	-9
769	M	5	F5d	124	123	-1	64	80	16
770	M	6	F5d	108	112	4	70	61	-9
771	F	5	F5d	124	113	-11	76	75	-1
772	M	5	F5d	168	150	-18	93	86	-7
773	F	8	F10d	146	114	-32	82	79	-3
774	M	5	F5d	126	146	20	74	82	8
775	M	9	F10d	160	184	24	80	86	6
776	M	8	F10d	119	105	-14	82	69	-13
777	F	8	F10d	124	130	6	78	75	-3
778	M	8	F10d	115	104	-11	80	76	-4
779	F	6	F5d	93	92	-1	58	59	1
780	F	9	F10d	143	143	0	93	92	-1
781	F	14	F15d	139	139	0	86	83	-3
782	F	8	F10d	121	100	-21	70	62	-8
783	F	8	F10d	120	112	-8	70	67	-3
784	M	5	F5d	134	129	-5	90	79	-11
785	F	5	F5d	138	139	1	75	73	-2
786	F	8	F10d	117	120	3	75	85	10
787	M	8	F10d	130	113	-17	80	83	3
788	F	5	F5d	108	110	2	73	75	2
789	F	5	F5d	130	126	-4	70	82	12
790	M	14	F15d	126	82	-44	88	82	-6
791	F	5	F5d	120	145	25	76	82	6
792	F	14	F15d	146	130	-16	89	86	-3
793	F	5	F5d	115	109	-6	80	69	-11
794	F	5	F5d	103	120	17	67	77	10
795	F	5	F5d	115	110	-5	74	79	5
796	M	5	F5d	164	137	-27	95	85	-10
797	F	8	F10d	121	120	-1	88	80	-8
798	M	9	F10d	134	130	-4	93	84	-9
799	F	14	F15d	143	145	2	91	90	-1
800	M	5	F5d	115	117	2	72	77	5
801	M	8	F10d	116	105	-11	74	64	-10
802	F	8	F10d		123			82
803	M	8	F10d	139	106	-33	87	70	-17
804	M	8	F10d	152	135	-17	102	85	-17
805	F	8	F10d	150	143	-7	107	93	-14
806	F	5	F5d	109	103	-6	66	69	3
807	F	5	F5d	131	129	-2	94	82	-12
808	M	5	F5d	156	169	13	104	92	-12
809	F	8	F10d	135	117	-18	46	82	36
810	F	5	F5d	150	154	4	94	101	7
811	M	5	F5d	141	137	-4	79	76	-3
812	M	8	F10d	183	150	-33	94	80	-14
813	F	8	F10d	183	121	-62	94	71	-23
814	M	6	F5d	142	150	8	101	96	-5
815	F	6	F5d	130	124	-6	86	77	-9
816	F	5	F5d	127	113	-14	76	71	-5
817	F	5	F5d	115	112	-3	82	74	-8
818	F	5	F5d	156	130	-26	108	80	-28
819	M	5	F5d	140	135	-5	89	80	-9
820	F	4	F5d	106	93	-13	74	68	-6
821	F	14	F15d	114	102	-12	77	65	-12
822	F	15	F15d	136	111	-25	89	78	-11
823	M	4	F5d	107	114	7	74	72	-2
824	F	15	F15d	130	126	-4	90	82	-8
825	F	5	F5d	113	102	-11	77	62	-15
826	F	7	F5d	125	120	-5	74	97	23
827	F	13	F15d	141	121	-20	95	79	-16
828	M	5	F5d	110	111	1	74	73	-1
829	F	5	F5d	94	111	17	62	68	6
830	F	5	F5d	107	109	2	71	72	1
831	M	5	F5d	115	130	15	76	84	8
832	F	8	F10d		104			64
833	F	11	F10d	124	106	-18	95	74	-21
834	F	8	F10d	156	114	-42	93	81	-12
835	F	13	F15d	96	97	1	62	67	5
836	F	15	F15d	96	93	-3	66	51	-15
837	F	5	F5d	100	101	1	65	65	0
838	F	13	F15d	135	130	-5	91	82	-9
839	F	14	F15d	90	98	8	61	72	11
840	F	10	F10d	121	115	-6	78	70	-8
841	M	5	F5d		108			73
842	F	5	F5d	110	107	-3	71	73	2
843	F	6	F5d		143			102
844	F	5	F5d	123	114	-9	77	73	-4
845	F	5	F5d	141	131	-10	86	91	5
846	F	8	F10d	106	102	-4	72	70	-2
847	M	10	F10d	121	106	-15	75	72	-3
848	F	8	F10d	110	98	-12	72	70	-2
849	F	9	F10d	116	121	5	75	78	3
850	F	8	F10d	125	119	-6	78	74	-4
851	F	8	F10d	138	106	-32	93	68	-25
852	M	14	F15d		123			89
853	F	8	F10d	113	106	-7	74	71	-3
854	M	14	F15d	153	135	-18	92	86	-6
855	F	5	F5d	102	113	11	65	69	4
856	F	5	F5d	126	130	4	86	78	-8
857	M	6	F5d	128	110	-18	86	76	-10
858	M	5	F5d	134	123	-11	88	82	-6
859	M	8	F10d	148	129	-19	81	81	0
860	F	5	F5d	122	130	8	86	90	4
861	M	5	F5d	125	101	-24	81	70	-11
862	F	5	F5d		107			76
863	M	8	F10d		106			73
864	M	7	F5d		115			62
865	F	6	F5d		115			74
866	F	5	F5d	129	131	2	90	89	-1
867	F	5	F5d	137	121	-16	87	78	-9
868	M	8	F10d	146	102	-44	87	69	-18
869	F	8	F10d	97	121	24	70	78	8
870	M	8	F10d	125	118	-7	83	86	3
871	F	21	F20d	121	114	-7	83	79	-4
872	M	8	F10d	124	126	2	78	82	4
873	F	13	F15d	114	98	-16	82	59	-23
874	F	8	F10d	112	110	-2	76	74	-2
875	F	5	F5d	126	101	-25	85	76	-9
876	F	9	F10d	153	128	-25	102	79	-23
877	M	8	F10d	130	120	-10	80	80	0
878	M	9	F10d	123	130	7	86	85	-1
879	F	8	F10d	131	110	-21	92	71	-21
880	M	8	F10d	110	122	12	69	72	3
881	F	21	F20d	109	110	1	74	89	15
882	M	21	F20d	132	117	-15	78	72	-6
883	M	8	F10d	128	131	3	93	77	-16
884	M	15	F15d	130	109	-21	77	67	-10
885	F	8	F10d	114	106	-8	75	76	1
886	F	6	F5d	118	112	-6	75	72	-3
887	M	5	F5d	129	113	-16	80	68	-12
888	F	7	F5d	140	138	-2	74	78	4
889	F	14	F15d	126	131	5	85	81	-4
890	F	5	F5d	121	134	13	86	86	0
891	F	13	F15d	138	102	-36	88	78	-10
892	F	8	F10d	108	96	-12	78	70	-8
893	F	19	F20d	131	128	-3	91	86	-5
894	F	8	F10d	110	102	-8	77	64	-13
895	F	5	F5d	135	140	5	101	92	-9
896	M	5	F5d	130	126	-4	78	73	-5
897	F	8	F10d	133	114	-19	89	82	-7
898	M	8	F10d	146	113	-33	98	78	-20
899	F	14	F15d	154	91	-63	89	65	-24
900	M	14	F15d	157	108	-49	99	77	-22
901	F	20	F20d	121	120	-1	85	90	5
902	M	13	F15d	113	170	57	87	98	11
903	F	9	F10d		90			66
904	F	9	F10d	143	108	-35	86	72	-14
905	F	8	F10d	125	102	-23	82	67	-15
906	M	14	F15d	138	104	-34	90	70	-20
907	M	8	F10d	154	117	-37	89	75	-14
908	F	8	F10d	109	103	-6	79	65	-14
909	M	5	F5d	160	134	-26	90	85	-5
910	F	6	F5d	104	108	4	68	68	0
911	M	14	F15d	106	97	-9	84	64	-20
912	F	6	F5d	110	104	-6	69	74	5
913	M	6	F5d	118	116	-2	87	80	-7
914	M	14	F15d	135	112	-23	80	70	-10
915	F	14	F15d	109	90	-19	62	62	0
916	F	14	F15d	105	104	-1	66	69	3
917	M	7	F5d	156	156	0	86	98	12
918	M	12	F10d	115	106	-9	81	92	11
919	M	21	F20d	131	124	-7	88	82	-6
920	F	9	F10d	121	114	-7	70	62	-8
921	F	5	F5d	99	114	15	81	73	-8
922	M	5	F5d	170	150	-20	93	85	-8
923	F	5	F5d	115	115	0	80	74	-6
924	M	14	F15d	146	149	3	80	71	-9
925	F	5	F5d	120	94	-26	80	64	-16
926	M	9	F10d	169	146	-23	105	98	-7
927	F	5	F5d	93	99	6	61	58	-3
928	F	6	F5d	165	125	-40	90	86	-4
929	F	8	F10d	141	122	-19	94	84	-10
930	F	21	F20d	119			72
931	F	21	F20d	115			76
932	M	8	F10d	160	137	-23	98	95	-3
933	F	9	F10d	126	124	-2	86	78	-8
934	F	8	F10d	122	115	-7	79	70	-9
935	M	4	F5d	147	129	-18	98	87	-11
936	F	8	F10d	132	116	-16	81	73	-8
937	F	9	F10d	120	110	-10	70	65	-5
938	F	11	F10d	121	128	7	70	74	4
939	M	5	F5d	132	134	2	86	91	5
940	F	8	F10d	110	103	-7	75	70	-5
941	M	5	F5d	130	112	-18	75	74	-1
942	F	6	F5d		101			67
943	M	6	F5d	114	116	2	70	70	0
944	M	5	F5d	150	139	-11	85	87	2
945	F	5	F5d	123	119	-4	81	74	-7
946	F	10	F10d	110	118	8	70	74	4
947	M	8	F10d	159	144	-15	98	87	-11
948	F	8	F10d	122	102	-20	78	70	-8
949	F	8	F10d	140	131	-9	90	82	-8
950	M	9	F10d	155	118	-37	90	86	-4
951	M	7	F5d	137	120	-17	86	82	-4
952	F	10	F10d	124	109	-15	75	71	-4
953	F	5	F5d	105	114	9	68	76	8
954	M	8	F10d	114	102	-12	73	66	-7
955	F	7	F5d	112	115	3	83	115	32
956	F	8	F10d	118	118	0	78	82	4
957	F	8	F10d	120	110	-10	78	72	-6
958	M	12	F10d	146	149	3	92	87	-5
959	M	7	F5d	149	128	-21	91	77	-14
960	M	5	F5d	156	150	-6	90	98	8
961	F	5	F5d	94	101	7	69	70	1
962	F	14	F15d	119	99	-20	72	58	-14
963	M	9	F10d	136	121	-15	98	71	-27
964	F	5	F5d	110	110	0	69	71	2
965	M	5	F5d	132	116	-16	83	86	3
966	F	5	F5d	122	114	-8	89	85	-4
967	M	17	F15d	159	119	-40	95	78	-17
968	F	7	F5d	99	110	11	63	68	5
969	M	5	F5d	121	100	-21	64	68	4
970	F	5	F5d	170	130	-40	96	80	-16
971	F	6	F5d	141	133	-8	77	76	-1
972	F	16	F15d	108	102	-6	76	74	-2
973	F	7	F5d	186	130	-56	110	80	-30
974	F	14	F15d	133	111	-22	77	66	-11
975	M	9	F10d	134	106	-28	86	65	-21
976	M	8	F10d	151	140	-11	86	78	-8
977	M	7	F5d		120			90
978	F	15	F15d		90			66
979	F	14	F15d	143	154	11	81	80	-1
980	F	5	F5d	126	110	-16	76	72	-4
981	F	7	F5d	103	102	-1	63	57	-6
982	M	8	F10d	121	122	1	75	76	1
983	F	15	F15d	146	109	-37	94	81	-13
984	F	14	F15d	123	101	-22	70	64	-6
985	F	5	F5d	134	99	-35	83	74	-9
986	F	9	F10d	99	91	-8	70	66	-4
987	F	5	F5d	137	118	-19	79	77	-2
988	F	8	F10d	127	98	-29	74	72	-2
989	F	5	F5d	115	98	-17	82	73	-9
990	F	7	F5d	106	106	0	62	70	8
991	F	8	F10d	108	98	-10	73	66	-7
992	M	5	F5d	111	121	10	70	73	3
993	M	13	F15d	135	126	-9	74	69	-5
994	M	5	F5d	112	122	10	83	78	-5
995	M	5	F5d	111	119	8	73	73	0
996	F	6	F5d	114	123	9	88	83	-5
997	F	6	F5d	115	125	10	82	76	-6
998	F	5	F5d	124	122	-2	83	87	4
999	F	5	F5d	120	107	-13	77	63	-14
1000	F	8	F10d	118	106	-12	76	65	-11
1001	M	6	F5d	139	134	-5	90	78	-12
1002	F	16	F15d	134	109	-25	98	81	-17
1003	F	6	F5d	138	126	-12	88	87	-1
1004	M	20	F20d	161	110	-51	110	94	-16
1005	M	8	F10d	137	122	-15	94	82	-12
1006	M	7	F5d	154	109	-45	93	81	-12
1007	F	14	F15d	91	86	-5	62	62	0
1008	M	5	F5d	133	114	-19	90	78	-12
1009	F	6	F5d	134	114	-20	77	75	-2
1010	M	6	F5d	128	117	-11	73	76	3
1011	M	8	F10d	150	146	-4	100	86	-14
1012	F	14	F15d	102	115	13	67	82	15
1013	F	9	F10d	109	117	8	85	66	-19
1014	M	6	F5d	121	119	-2	75	76	1
1015	F	6	F5d	110	106	-4	70	80	10
1016	F	9	F10d	132	123	-9	76	80	4
1017	F	9	F10d	90	96	6	60	62	2
1018	F	5	F5d	106	101	-5	73	69	-4
1019	F	5	F5d	117	135	18	86	86	0
1020	M	8	F10d	129	133	4	88	78	-10
1021	F	8	F10d	108	106	-2	74	70	-4
1022	F	9	F10d	156	126	-30	106	85	-21
1023	F	7	F5d	120	120	0	80	80	0
1024	F	14	F15d	106	94	-12	66	65	-1
1025	F	14	F15d	134	121	-13	87	78	-9
1026	F	9	F10d	110	105	-5	79	70	-9
1027	F	8	F10d	130	127	-3	97	89	-8
1028	F	8	F10d	131	127	-4	81	80	-1
1029	M	9	F10d	124	127	3	82	79	-3
1030	M	6	F5d	149	163	14	88	87	-1
1031	M	7	F5d	106	126	20	78	77	-1
1032	F	8	F10d	111	112	1	79	77	-2
1033	F	6	F5d	111	92	-19	78	70	-8
1034	F	6	F5d	144	115	-29	86	85	-1
1035	M	5	F5d	132	143	11	81	76	-5
1036	F	6	F5d	113	107	-6	70	75	5
1037	F	5	F5d	113	128	15	89	87	-2
1038	F	5	F5d	126	106	-20	74	67	-7
1039	F	14	F15d	125	140	15	80	80	0
1040	F	8	F10d	145	137	-8	91	93	2
1041	M	14	F15d	155	136	-19	98	86	-12
1042	F	5	F5d	133	107	-26	83	80	-3
1043	M	14	F15d	173	114	-59	99	77	-22
1044	M	8	F10d		121			78
1045	F	8	F10d	146	110	-36	86	80	-6
1046	M	5	F5d	147	141	-6	92	98	6
1047	F	8	F10d	113	108	-5	76	66	-10
1048	F	6	F5d	96	95	-1	65	64	-1
1049	M	6	F5d	125	126	1	92	83	-9
1050	F	6	F5d	127	113	-14	82	82	0
1051	M	6	F5d	129	114	-15	82	79	-3
1052	M	5	F5d	136	130	-6	95	90	-5
1053	F	6	F5d	113	98	-15	76	68	-8
1054	M	14	F15d	138	122	-16	98	94	-4
1055	F	13	F15d	98	94	-4	68	59	-9
1056	F	5	F5d	117	124	7	71	74	3
1057	M	8	F10d	120	114	-6	80	74	-6
1058	F	10	F10d	134	114	-20	84	72	-12
1059	M	5	F5d	108	98	-10	68	62	-6
1060	M	8	F10d	121			74
1061	M	7	F5d	133	118	-15	93	82	-11
1062	M	14	F15d	168	149	-19	93	89	-4
1063	M	9	F10d	124	114	-10	83	78	-5
1064	F	6	F5d	118	110	-8	82	82	0
1065	M	15	F15d	142	138	-4	101	92	-9
1066	M	14	F15d	115	98	-17	74	67	-7
1067	F	14	F15d	112	115	3	87	74	-13
1068	F	14	F15d	164	118	-46	90	81	-9
1069	F	8	F10d	114	130	16	90	86	-4
1070	F	13	F15d	151	118	-33	82	75	-7
1071	F	12	F10d	116	90	-26	68	61	-7
1072	F	5	F5d	100	98	-2	72	67	-5
1073	F	14	F15d	140	106	-34	98	74	-24
1074	F	14	F15d	126	112	-14	76	74	-2
1075	F	9	F10d	116	129	13	80	80	0
1076	F	10	F10d	159	120	-39	99	80	-19
1077	F	14	F15d	133	103	-30	90	77	-13
1078	F	8	F10d	158	128	-30	87	75	-12
1079	F	8	F10d	144	99	-45	90	73	-17
1080	F	8	F10d	118	110	-8	67	63	-4
1081	F	8	F10d	154	150	-4	95	95	0
1082	F	8	F10d	110	102	-8	65	59	-6
1083	F	14	F15d	148	126	-22	84	75	-9
1084	F	13	F15d	129	125	-4	98	98	0
1085	F	5	F5d	129	103	-26	83	70	-13
1086	F	14	F15d	134	105	-29	82	72	-10
1087	F	5	F5d	127	114	-13	91	78	-13
1088	F	5	F5d	126	106	-20	85	78	-7
1089	M	8	F10d	124	126	2	77	75	-2
1090	M	9	F10d	131	118	-13	81	71	-10
1091	M	8	F10d	136	123	-13	85	84	-1
1092	M	11	F10d	130	117	-13	92	78	-14
1093	M	7	F5d	128	129	1	80	79	-1
1094	F	8	F10d	120	114	-6	74	75	1
1095	M	14	F15d	144	116	-28	82	67	-15
1096	F	8	F10d	118	123	5	82	87	5
1097	F	8	F10d	138	134	-4	81	72	-9
1098	F	14	F15d	114			71
1099	M	9	F10d	111	112	1	68	65	-3
1100	M	5	F5d	135	137	2	86	79	-7
1101	F	7	F5d	110	115	5	73	78	5
1102	F	8	F10d	134	103	-31	80	75	-5
1103	M	8	F10d	130	124	-6	94	79	-15
1104	F	14	F15d	166	140	-26	94	80	-14
1105	F	8	F10d	128	112	-16	82	87	5
1106	M	8	F10d	114	122	8	76	70	-6
1107	F	5	F5d	138	130	-8	82	78	-4
1108	M	18	F20d	114	122	8	69	67	-2
1109	M	5	F5d	137	129	-8	83	82	-1
1110	F	5	F5d	127	126	-1	71	69	-2
1111	M	8	F10d	158	134	-24	103	92	-11
1112	F	5	F5d	160	158	-2	102	98	-4
1113	F	8	F10d	124	125	1	79	80	1
1114	F	8	F10d	113	110	-3	73	80	7
1115	M	5	F5d	110	130	20	78	81	3
1116	F	6	F5d	114	114	0	73	73	0
1117	M	5	F5d	122	117	-5	87	79	-8
1118	M	5	F5d	132	113	-19	94	82	-12
1119	M	5	F5d	124	119	-5	90	80	-10
1120	M	8	F10d	119	120	1	72	71	-1
1121	F	4	F5d	166	127	-39	99	93	-6
1122	F	5	F5d	123	111	-12	82	80	-2
1123	F	20	F20d	102	104	2	66	63	-3
1124	F	18	F20d	137	133	-4	86	76	-10
1125	M	7	F5d	132	119	-13	86	83	-3
1126	F	9	F10d	119			79
1127	M	5	F5d	165	134	-31	70	82	12
1128	M	12	F10d	124	126	2	72	80	8
1129	F	8	F10d	146	101	-45	107	79	-28
1130	F	8	F10d	146	157	11	99	84	-15
1131	F	4	F5d	122	118	-4	77	70	-7
1132	M	5	F5d	133	130	-3	88	78	-10
1133	F	5	F5d	151	143	-8	84	97	13
1134	F	9	F10d	150	128	-22	93	88	-5
1135	F	7	F5d	110	102	-8	66	66	0
1136	M	5	F5d	124	117	-7	83	78	-5
1137	M	12	F10d	117	130	13	68	70	2
1138	M	5	F5d	141	153	12	93	89	-4
1139	F	13	F15d	137	138	1	83	90	7
1140	F	7	F5d	157	120	-37	90	70	-20
1141	F	6	F5d		106			77
1142	F	5	F5d	110	119	9	73	79	6
1143	M	5	F5d	124	130	6	74	76	2
1144	F	5	F5d	111	132	21	74	70	-4
1145	F	9	F10d	120	107	-13	78	65	-13
1146	M	8	F10d	131	121	-10	92	82	-10
1147	F	8	F10d	137	142	5	78	69	-9
1148	F	14	F15d	122	120	-2	83	79	-4
1149	F	5	F5d	134	114	-20	89	75	-14
1150	F	5	F5d	109	114	5	73	72	-1
1151	M	14	F15d	133	101	-32	96	78	-18
1152	F	6	F5d	120	110	-10	70	67	-3
1153	F	6	F5d	162	150	-12	72	80	8
1154	F	8	F10d	173	144	-29	95	86	-9
1155	F	14	F15d	141	127	-14	83	74	-9
1156	M	5	F5d	150	130	-20	90	80	-10
1157	F	5	F5d	112	100	-12	83	70	-13
1158	F	5	F5d	138	155	17	82	60	-22
1159	F	5	F5d	120	114	-6	90	94	4
1160	M	5	F5d	120	132	12	80	81	1
1161	F	5	F5d	140	120	-20	90	90	0
1162	M	8	F10d	146	119	-27	92	76	-16
1163	F	4	F5d	122	110	-12	102	74	-28
1164	M	4	F5d	136	130	-6	80	78	-2
1165	F	8	F10d	170	153	-17	73	74	1
1166	M	5	F5d	115	111	-4	80	78	-2
1167	M	5	F5d	146	142	-4	78	87	9
1168	F	9	F10d	133	125	-8	84	70	-14
1169	F	8	F10d	135	116	-19	82	91	9
1170	F	5	F5d	137	143	6	97	98	1
1171	M	10	F10d	139	106	-33	85	78	-7
1172	F	8	F10d		137			89
1173	F	8	F10d		110			71
1174	M	8	F10d	156	114	-42	97	85	-12
1175	M	8	F10d	162	131	-31	102	94	-8
1176	F	8	F10d	98	98	0	59	59	0
1177	F	8	F10d	114	108	-6	86	70	-16
1178	F	7	F5d	125	103	-22	82	74	-8
1179	M	8	F10d	124	118	-6	98	88	-10
1180	M	7	F5d		145			86
1181	F	5	F5d	129	131	2	74	78	4
1182	M	5	F5d	128	118	-10	74	67	-7
1183	F	5	F5d	151	126	-25	92	87	-5
1184	M	6	F5d	143	143	0	91	86	-5
1185	F	5	F5d	126	122	-4	74	69	-5
1186	M	5	F5d	120	120	0	81	77	-4
1187	F	5	F5d	126	120	-6	82	78	-4
1188	F	5	F5d	108	104	-4	96	66	-30
1189	F	5	F5d	121	106	-15	78	68	-10
1190	F	5	F5d	104	122	18	74	72	-2
1191	M	7	F5d	137	124	-13	77	70	-7
1192	M	5	F5d	111	102	-9	70	65	-5
1193	F	5	F5d	116	115	-1	81	77	-4
1194	F	5	F5d	144	126	-18	89	86	-3
1195	F	8	F10d	114	98	-16	73	62	-11
1196	F	7	F5d		142			83
1197	M	8	F10d	122	110	-12	87	75	-12
1198	F	8	F10d		119			69
1199	F	7	F5d		121			81
1200	M	5	F5d	155	147	-8	90	98	8
1201	F	9	F10d	189	151	-38	98	96	-2
1202	F	8	F10d	159	127	-32	88	70	-18
1203	M	10	F10d		140			80
1204	M	8	F10d	146	128	-18	87	86	-1
1205	F	8	F10d	115	128	13	69	72	3
1206	M	8	F10d	119	113	-6	80	81	1
1207	F	15	F15d		114			77
1208	M	16	F15d	171	154	-17	93	97	4
1209	F	6	F5d	143	122	-21	102	82	-20
1210	F	5	F5d	108	112	4	79	74	-5
1211	M	7	F5d	147	95	-52	92	70	-22
1212	F	8	F10d	119	106	-13	74	74	0
1213	F	14	F15d	146	107	-39	90	70	-20
1214	F	5	F5d	94	95	1	65	61	-4
1215	M	5	F5d	178	140	-38	93	80	-13
1216	F	8	F10d	137	105	-32	72	70	-2
1217	F	8	F10d	106	112	6	71	70	-1
1218	F	5	F5d	144	145	1	94	98	4
1219	F	5	F5d	104	104	0	69	67	-2
1220	F	5	F5d	130	126	-4	86	82	-4
1221	F	5	F5d	126	112	-14	78	66	-12
1222	F	4	F5d	150	137	-13	82	74	-8
1223	F	5	F5d	123	138	15	75	82	7
1224	F	9	F10d	126	120	-6	89	80	-9
1225	M	9	F10d	166	110	-56	98	80	-18
1226	F	8	F10d	128	115	-13	81	70	-11
1227	F	9	F10d	106	99	-7	64	73	9
1228	F	8	F10d	130	144	14	88	85	-3
1229	F	5	F5d	153	136	-17	102	89	-13
1230	F	5	F5d	114	110	-4	78	68	-10
1231	F	5	F5d	134	126	-8	79	82	3
1232	M	8	F10d	140	124	-16	85	73	-12
1233	F	5	F5d	113	107	-6	73	56	-17
1234	M	9	F10d	125	100	-25	86	74	-12
1235	F	7	F5d		101			77
1236	F	9	F10d	144	189	45	82	82	0
1237	M	8	F10d	129	134	5	88	81	-7
1238	M	14	F15d	150	95	-55	82	55	-27
1239	F	8	F10d	115			94
1240	M	5	F5d	136	127	-9	78	78	0
1241	M	5	F5d	122	114	-8	78	79	1
1242	M	8	F10d	148	150	2	99	94	-5
1243	M	5	F5d	162	127	-35	100	78	-22
1244	F	5	F5d	116	114	-2	87	80	-7
1245	F	14	F15d	108			54
1246	M	5	F5d	137	130	-7	86	80	-6
1247	F	5	F5d		125			75
1248	F	5	F5d	134	138	4	87	82	-5
1249	F	4	F5d	124	122	-2	84	82	-2
1250	F	5	F5d	123	124	1	69	67	-2
1251	F	5	F5d	118	124	6	72	74	2
1252	F	5	F5d	110	122	12	70	72	2
1253	F	4	F5d	138	116	-22	91	83	-8
1254	M	4	F5d	106	122	16	78	72	-6
1255	F	14	F15d	149	133	-16	85	68	-17
1256	F	4	F5d	100	103	3	76	66	-10
1257	F	5	F5d	130	110	-20	84	79	-5
1258	M	5	F5d	150	113	-37	90	70	-20
1259	F	8	F10d	122	130	8	71	76	5
1260	F	8	F10d	172	148	-24	101	94	-7
1261	M	8	F10d	116	114	-2	75	71	-4
1262	M	8	F10d	150	113	-37	106	78	-28
1263	F	8	F10d	118	110	-8	82	71	-11
1264	M	8	F10d	90	135	45	64	91	27
1265	M	13	F15d	167	134	-33	112	88	-24
1266	M	14	F15d	150	122	-28	78	62	-16
1267	M	14	F15d	162	125	-37	99	86	-13
1268	M	9	F10d	124	124	0	83	81	-2
1269	F	8	F10d	139	126	-13	82	83	1
1270	F	14	F15d	118	98	-20	78	70	-8
1271	M	6	F5d	126	116	-10	79	81	2
1272	M	5	F5d	150	129	-21	83	74	-9
1273	F	6	F5d	155	115	-40	126	70	-56
1274	M	5	F5d	141	138	-3	84	66	-18
1275	F	5	F5d	134	119	-15	90	82	-8
1276	F	8	F10d	117	104	-13	82	76	-6
1277	F	11	F10d	138	116	-22	87	72	-15
1278	F	8	F10d	123	109	-14	79	71	-8
1279	F	14	F15d	118	112	-6	85	80	-5
1280	M	5	F5d	182			115
1281	F	5	F5d	94	122	28	61	71	10
1282	M	8	F10d	164	130	-34	98	80	-18
1283	F	6	F5d	100	93	-7	67	67	0
1284	F	9	F10d	92	89	-3	64	61	-3
1285	M	7	F5d	130	126	-4	77	74	-3
1286	M	5	F5d	136	111	-25	82	68	-14
1287	F	5	F5d	111	101	-10	73	67	-6
1288	M	8	F10d	116	111	-5	85	71	-14
1289	F	8	F10d	133	142	9	94	94	0
1290	F	8	F10d	162	116	-46	98	66	-32
1291	F	8	F10d	124	117	-7	70	69	-1
1292	F	8	F10d	130	94	-36	71	68	-3
1293	F	10	F10d	130	114	-16	70	93	23
1294	F	13	F15d	175	143	-32	95	87	-8
1295	F	14	F15d	157	123	-34	96	78	-18
1296	M	8	F10d	139	110	-29	80	80	0
1297	F	9	F10d	102	122	20	81	73	-8
1298	M	8	F10d	156	117	-39	100	74	-26
1299	F	21	F20d	173	109	-64	105	62	-43
1300	F	5	F5d	121	140	19	75	79	4
1301	M	8	F10d	148	106	-42	98	79	-19
1302	M	8	F10d	154	138	-16	116	106	-10
1303	F	8	F10d	132	112	-20	77	76	-1
1304	F	8	F10d	127	113	-14	94	94	0
1305	M	8	F10d	140	124	-16	67	64	-3
1306	M	8	F10d	117	107	-10	83	81	-2
1307	F	9	F10d	142	119	-23	97	78	-19
1308	F	5	F5d	139	137	-2	96	94	-2
1309	F	14	F15d	149	120	-29	98	80	-18
1310	F	5	F5d	111	106	-5	66	65	-1
1311	F	5	F5d	122	109	-13	70	70	0
1312	M	14	F15d	140	140	0	70	60	-10
1313	F	5	F5d	112	102	-10	89	64	-25
1314	M	8	F10d	147	113	-34	92	83	-9
1315	F	8	F10d	128	120	-8	89	75	-14
1316	M	5	F5d	134	137	3	86	88	2
1317	M	8	F10d	118	125	7	72	82	10
1318	F	8	F10d	129	145	16	87	82	-5
1319	F	5	F5d	139	129	-10	86	96	10
1320	M	5	F5d		114			82
1321	F	8	F10d	128	130	2	85	84	-1
1322	M	8	F10d	118	128	10	83	79	-4
1323	F	8	F10d	132	129	-3	89	79	-10
1324	F	8	F10d	145	134	-11	89	92	3
1325	F	8	F10d	74	106	32	68	79	11
1326	M	8	F10d	118	113	-5	76	70	-6
1327	F	10	F10d	105	97	-8	75	65	-10
1328	F	14	F15d	130	122	-8	79	62	-17
1329	F	7	F5d	168	142	-26	78	77	-1
1330	M	8	F10d	121	118	-3	73	71	-2
1331	F	8	F10d	114	108	-6	79	78	-1
1332	M	8	F10d	122	116	-6	82	67	-15
1333	M	9	F10d	116	114	-2	73	71	-2
1334	F	8	F10d	138	127	-11	90	71	-19
1335	M	14	F15d	134	127	-7	78	76	-2
1336	F	14	F15d	140	134	-6	87	90	3
1337	F	15	F15d	155	133	-22	92	88	-4
1338	M	8	F10d		141			89
1339	M	8	F10d		118			90
1340	F	5	F5d	103	117	14	74	78	4
1341	F	5	F5d	90	112	22	66	79	13
1342	F	5	F5d	110	90	-20	74	72	-2
1343	F	5	F5d	83	139	56	67	67	0
1344	M	8	F10d	142	128	-14	90	74	-16
1345	F	8	F10d	137	117	-20	91	72	-19
1346	M	8	F10d	150	118	-32	98	98	0
1347	F	5	F5d	103	122	19	74	73	-1
1348	M	5	F5d	123	126	3	83	82	-1
1349	M	5	F5d	130	127	-3	79	84	5
1350	F	8	F10d	153	136	-17	98	86	-12
1351	M	8	F10d	136	130	-6	86	86	0
1352	M	14	F15d	173	130	-43	113	89	-24
1353	M	8	F10d	134	131	-3	100	90	-10
1354	F	8	F10d	140	145	5	80	89	9
1355	F	13	F15d	120	106	-14	80	74	-6
1356	F	13	F15d	159	138	-21	90	85	-5
1357	F	8	F10d	153			98
1358	F	13	F15d	160	130	-30	82	80	-2
1359	M	5	F5d	122	130	8	85	91	6
1360	M	5	F5d	110	117	7	73	78	5
1361	F	8	F10d	116	98	-18	74	68	-6
1362	F	12	F10d	133	95	-38	83	70	-13
1363	M	8	F10d	182	135	-47	107	74	-33
1364	M	5	F5d		102			65
1365	M	7	F5d	137	126	-11	83	70	-13
1366	M	7	F5d	146	131	-15	98	95	-3
1367	M	14	F15d	176	129	-47	110	98	-12
1368	F	9	F10d	129	122	-7	86	82	-4
1369	M	9	F10d	116	136	20	77	83	6
1370	F	14	F15d	140	135	-5	90	85	-5
1371	F	8	F10d	114	73	-41	74	78	4
1372	M	8	F10d	163	146	-17	114	98	-16
1373	M	16	F15d	174	126	-48	100	89	-11
1374	F	8	F10d	142	125	-17	96	85	-11
1375	F	8	F10d	99	110	11	62	76	14
1376	M	14	F15d	143	122	-21	92	86	-6
1377	M	15	F15d		140			80
1378	F	21	F20d	117	101	-16	78	59	-19
1379	F	5	F5d	116	110	-6	71	74	3
1380	F	5	F5d	130	114	-16	84	74	-10
1381	M	8	F10d	118	118	0	79	74	-5
1382	F	8	F10d	114	106	-8	76	69	-7
1383	F	8	F10d	130	152	22	90	94	4
1384	F	21	F20d	120	106	-14	80	70	-10
1385	M	7	F5d	138	120	-18	92	81	-11
1386	M	8	F10d	152	104	-48	91	74	-17
1387	F	5	F5d		115			82
1388	M	7	F5d	122	134	12	93	89	-4
1389	F	8	F10d	125	130	5	85	92	7
1390	F	12	F10d	119	113	-6	82	69	-13
1391	F	12	F10d	141	130	-11	78	83	5
1392	F	5	F5d	117	120	3	78	79	1
1393	M	8	F10d	140	109	-31	95	80	-15
1394	F	20	F20d	84	110	26	66	78	12
1395	F	5	F5d	150	123	-27	99	82	-17
1396	M	6	F5d	130	126	-4	88	83	-5
1397	F	9	F10d	112	119	7	84	68	-16
1398	F	5	F5d	116	114	-2	82	76	-6
1399	F	5	F5d	109	97	-12	61	69	8
1400	M	5	F5d	180	120	-60	100	80	-20
1401	F	5	F5d	145	120	-25	80	80	0
1402	F	5	F5d	171	112	-59	108	68	-40
1403	M	5	F5d	111	109	-2	77	66	-11
1404	M	7	F5d	128	125	-3	74	67	-7
1405	M	5	F5d	120	102	-18	73	74	1
1406	M	7	F5d		131			82
1407	F	5	F5d	126	98	-28	78	70	-8
1408	F	6	F5d	108	90	-18	67	65	-2
1409	F	5	F5d	130	118	-12	80	74	-6
1410	M	5	F5d	134	112	-22	89	72	-17
1411	F	7	F5d	118	130	12	79	78	-1
1412	F	6	F5d	134	118	-16	82	84	2
1413	F	5	F5d	170	120	-50	80	80	0
1414	F	14	F15d	124	102	-22	95	66	-29
1415	F	8	F10d	108	120	12	65	82	17
1416	F	14	F15d	102	100	-2	70	63	-7
1417	F	14	F15d	119	110	-9	90	78	-12
1418	M	6	F5d	133	125	-8	70	68	-2
1419	F	8	F10d	145	120	-25	80	80	0
1420	M	5	F5d		110			74
1421	F	5	F5d	126	117	-9	82	78	-4
1422	M	5	F5d	136	131	-5	75	66	-9
F, female; M, male, F5d, fasting 5±2 days; F10d, fasting 10±2 days; F15d, fasting 15±2 days; F20d, fasting 20±2 days; SBP, systolic blood pressure; DBP, diastolic blood pressure
