# Supplementary material for: Safety, health improvement and well-being during a 4 to 21-day fasting period in an observational study including 1422 subjects
Source: PLoS One. 2019 Jan 2;14(1):e0209353. doi: 10.1371/journal.pone.0209353 (PMC6314618; doi:10.1371/journal.pone.0209353)
Supplement: S13 Table — Occurrence of self-reported mild symptoms during fasting. (XLSX) [file pone.0209353.s013.xlsx]

## Sheet: Tabelle1
S13 Table. Raw data of S2 Fig. Occurrence of self-reported mild symptoms during fasting.
				self-reported mild symptoms
				headache (0=no; 1=yes)																						sleep disturbance (0=no; 1=yes)																						hunger (0=no; 1=yes)
patient number	sex	length of fast (days)	group	before	day 1	day 2	day 3	day 4	day 5	day 6	day 7	day 8	day 9	day 10	day 11	day 12	day 13	day 14	day 15	day 16	day 17	day 18	day 19	day 20	day 21	before	day 1	day 2	day 3	day 4	day 5	day 6	day 7	day 8	day 9	day 10	day 11	day 12	day 13	day 14	day 15	day 16	day 17	day 18	day 19	day 20	day 21	before	day 1
1	F	6	F5d	1	1	0	0	0	0	0	0	0	0													0	1	1	1	0	0	1	1	0	1													0	0
2	F	11	F10d		0	0	0	0	0	0	0	0	0	0	0	0	0										0	0	0	0	0	0	0	0	0	0	0	0	0										1
3	F	6	F5d	0	0	0	0	0	0	0	0															0	0	0	0	0	0	0	0															0	0
4	F	6	F5d		0	0	0	0	0	0	0	0	0														0	0	0	0	0	0	0	0	0														0
5	F	5	F5d	0	0	0	0	0	0	0																0	0	1	0	1	1	0																1	0
6	F	6	F5d	0	1	0	0	0	0	0	0															0	0	1	0	0	0	0	0															0	0
7	F	9	F10d	1	1	0	0	0	0	0	0	0	0	0												0	0	0	0	0	0	0	0	0	0	0												0	1
8	M	6	F5d	0	0	0	0	0	0	0	0															0	0	0	0	0	0	0	0															0	0
9	M	8	F10d
10	M	6	F5d				0																						0
11	F	9	F10d		0	0	0	0	0	0	0	0	0	0	0	0											0	0	0	0	0	0	0	0	0	0	0	0											0
12	F	9	F10d	0	0	0	0	0	0	0	0	0		0	0	0										0	0	0	0	0	0	0	0	0		0	0	0										0	0
13	F	8	F10d
14	F	9	F10d	0	0	0	0	0	0	0	0	0	0	0												0	0	0	0	0	0	0	0	0	0	0												0	0
15	F	8	F10d	1	1	0	0	0	0	0	0	0	0	0												0	0	0	0	0	0	0	0	0	0	0												0	0
16	M	8	F10d
17	F	8	F10d
18	F	6	F5d	0	0	0	0	0	0	0	0															0	1	0	0	0	0	0	0															0	0
19	F	5	F5d	0	0	0	0	0	0	0																0	0	0	0	0	0	0																0	1
20	M	5	F5d	1	0	0	0	0	0	0	0															0	0	0	1	0	0	0	0															0	0
21	F	5	F5d	1	0	0	0	0	0	1																0	0	0	0	0	1	0																0	0
22	M	5	F5d	1	1	1	1	0	1	1																0	0	0	0	0	0	0																0	0
23	M	5	F5d	0		1	1	0	0	0	0															0		0	0	0	0	0	0															0
24	F	9	F10d	0	0	0		0	0	0	0	0	0													0	0	0		0	0	0	0	0	0													0	0
25	F	5	F5d	1	1	0	0	0	0	0																0	0	1	1	1	1	1																0	0
26	M	5	F5d	0	0	0	0	0	0	0																0	0	0	0	0	0	0																0	0
27	M	15	F15d	1	1	1	0	0	0	0	0	0	0	0	0	0	0	0	0	0						0	0	0	0	0	0	0	0	0	0	0	0	0	0	1	1	1						0	0
28	F	4	F5d	0	1	1	0	0	1	0																1	1	1	1	1	1	1																1	0
29	F	8	F10d	0	0	0	0	0	0	0	0	1	0													1	1	1	1	0	0	1	0	0	0													0	0
30	M	17	F15d	0	0	0	0	0	0	0	0	0	0	0	0	0	0	0	0	0	0	0	0	0		0	0	0	1	0	0	0	0	0	0	0	0	0	0	0	0	0	0	0	0	0		0	0
31	M	12	F10d	0	0	0	0	0	1	1	0	1	1	0	0	0	0									0	0	0	0	0	0	0	0	0	1	0	0	0	0									0	0
32	F	10	F10d		0	0	0	0	0	0	0	0	0	0	0	0											0	0	0	0	0	0	0	0	0	0	0	0											0
33	M	9	F10d
34	F	10	F10d	0	1	0	0	0	0	0	0	0	0	0	0	0	0									0	0	0	0	0	0	0	0	0	0	0	1	0	0									0	0
35	F	6	F5d	0	0	0	0	0	0	0	0															1	1	0	0	1	0	0	0															0	0
36	F	5	F5d	0	0	0	0	0	0	0	0															0	0	0	0	0	0	0	0															0	0
37	M	7	F5d	0	0	0	0	0	0	0	0	0	0	0												0	0	0	0	0	0	0	0	0	0	0												0	0
38	F	6	F5d	0	0	0	0	0	0	0	0															0	0	0	0	0	0	0	0															0	0
39	F	8	F10d	1	0	1	0	0	0	0	0	0	0													1	1	1	1	1	1	1	1	1	1													0	0
40	F	14	F15d	1	1	0	0	0	0	0	0	0	0	0	0	0	0	0	0							0	0	0	0	0	0	0	0	0	0	0	0	0	0	0	0							0	0
41	F	14	F15d	1	0	0	0	0	0	0	0	0	0	0	0	0	0	0	0							0	0	0	1	1	0	1	0	0	1	0	0	0	0	0	0							0	0
42	M	8	F10d
43	F	8	F10d	0	0	0	0	0	0	0	0	0	0													1	0	1	1	0	1	0	1	1	1													0	0
44	F	15	F15d	1	1	1	0	0	1	1	0	0	0	0	0	0	0	0	0	0						1	1	1	1	1	0	0	0	0	1	1	1	1	1	0	0	0						1	0
45	M	7	F5d	1	0	0	0	0	0	0	0	0	0	0												0	0	0	0	0	0	0	0	0	0	0												0	0
46	F	19	F20d	0	1	0	0	0	0	0	0	0	0	0	0	0	0	0	0	0	0	0	0	0		0	0	0	0	0	0	0	0	0	0	0	0	0	0	0	0	0	0	0	0	0		0	0
47	M	8	F10d	0	0	0	0	0	0	0	0	0	0	0	0											0	0	0	0	0	0	0	0	0	0	0	0											0	0
48	F	10	F10d	0	0	0	0	0	0	0	0	0	0	0	0	0										1	0	0	0	0	0	0	0	0	0	0	0	0										0	0
49	M	8	F10d							0																						0
50	M	9	F10d	1	1	1	1	1	1	1	0	1	1	1	1											1	0	0	1	1	0	0	0	0	0	0	0											0	0
51	M	5	F5d	0	0	0	0	0	0	0	0															0	0	0	0	0	0	0	0															0	0
52	F	14	F15d	1	1	0	0	0	0	0	0	0	0	0	0	0	0	0	0	0						1	1	1	0	0	0	0	1	0	0	0	0	0	0	0	0	0						0	0
53	F	14	F15d	1	1	0	0	0	0	0	0	1	0	0	0	0	0	0	0	0						0	0	0	0	0	0	0	0	0	0	0	0	0	0	0	0	0						0	0
54	F	5	F5d	0	0	1	0	0	0	0																1	0	0	1	1	1	0																0	0
55	M	5	F5d	0	0	0	0	0	0	0																1	0	1	1	1	1	1																0	0
56	M	9	F10d	0	0	0	0	0	0	0	0	0	0	0	0											0	0	0	0	0	0	0	0	0	0	0	0											0	0
57	M	5	F5d	0	0	0	0	0	0	0	0															0	0	0	0	0	0	0	0															0	0
58	M	5	F5d		1	1	1	0	0	0	0	0	0														1	0	0	0	0	1	1	0	1														0
59	F	9	F10d
60	M	14	F15d	1	0	0	0	0	0	0	0	0	0	0	0	0	0	0	0	0						0	0	0	0	0	0	0	0	0	0	0	0	0	0	0	0	0						0	0
61	M	7	F5d	1	1	0	0	0	0	0	0	0	0													0	0	0	0	0	0	0	0	0	0													0	0
62	M	8	F10d	1	0	0	0	0	0	0	0	0	0													0	0	0	1	0	0	0	0	1	0													1	1
63	F	9	F10d	1	0	0	0	0	0	0	0	0	0	0												0	0	0	0	0	0	0	0	0	0	0												1	0
64	F	14	F15d	0	1	1	0	0	0	0	0	0	0	0	0	0	0	0	0							0	1	1	1	1	1	1	0	0	0	0	0	0	0	0	0							0	0
65	F	14	F15d	0	1	1	0	0	0	0	0	0	0	0	0	0	0	0	0	0						0	0	1	0	1	0	0	1	0	0	0	1	1	1	1	0	1						0	0
66	M	14	F15d	1	1	0	0	0	0	0	0	0	0	0	0	0	0	0	0	0						1	1	1	1	1	0	0	1	0	0	1	0	0	0	0	0	0						0	0
67	M	9	F10d	0	0	1	1	0	0	0	0	0	0	0	0	0	0									0	0	1	1	1	1	0	0	0	0	0	0	0	0									0	0
68	F	14	F15d	0	0	0	0	0	0	0	0	0	0	0	0	0	0	0	0	0						0	1	1	1	1	1	1	0	0	0	0	1	0	1	1	1	0						0	0
69	M	14	F15d	1	1		0	0	0		0	0	0	0	0	0	0	0	0	0						0	0		0	0	0		0	0	0	0	0	0	0	0	0	0						0	0
70	F	8	F10d	0	1	0	0	0	0	0	0	0	0													0	1	0	0	0	0	0	0	0	0													0	0
71	M	5	F5d	0	1	0	0	1	0	0																0	0	1	1	0	0	0																0	0
72	F	14	F15d	1	1	0	0	0	0	0	0	0	0	0	0	0	0	0	0							0	0	0	0	0	0	0	1	0	0	0	0	0	0	0	0							0	0
73	F	14	F15d	0	0	0	0	0	0	0	0	0	0	0	0	0	0	0	0	0						0	0	0	0	0	0	0	0	0	0	0	0	0	0	0	0	0						0	0
74	M	8	F10d	0	0	0	0	0	0	0	0	0	0	0												0	1	0	1	0	1	1	1	0	0	0												0	0
75	M	5	F5d	0	0	0	0	0	0	0																0	1	0	1	1	1	0																0	0
76	M	8	F10d
77	F	5	F5d	0	0	0	0	0	0	0																0	0	0	0	0	0	0																0	0
78	F	5	F5d	0	0	0	0	0	0	0																0	0	0	1	1	1	0																1	1
79	M	6	F5d
80	M	13	F15d
81	F	9	F10d	1	1	0	0	0	0	0	0	0	0	0	0	0	0									0	0	0	0	0	0	0	0	0	0	0	0	0	0									1	1
82	F	8	F10d	0	1	0	0	0	0	0	0	0	0													0	0	0	0	1	1	0	1	1	1													0	1
83	F	18	F20d	0	1	0	0	0	0	0	0	0	0	0	0	0	0	0	0	0	0	0	0	0	0	1	1	1	1	1	1	1	1	1	1	1	1	1	1	1	1	1	1	1	1	1	1	0	0
84	F	10	F10d
85	M	5	F5d	0	0	0	1	0	0	0																0	0	0	0	0	0	0																0	0
86	M	4	F5d	0	0	0	0	0	0	0																0	0	0	0	0	0	0																0	0
87	F	8	F10d	1	1	1	0	0	0	0	0	0	0	0												0	0	0	0	1	1	0	0	1	1	0												0	0
88	M	10	F10d	0	0	0	0	0	0	0	0	0	0	0	0											0	0	0	0	0	0	0	0	0	0	0	0											0	0
89	M	14	F15d	0	0	0	0	0	0	0	0	0	0	0	0	0	0	0	0	0						1	0	0	0	0	0	0	0	0	0	0	0	0	0	0	0	0						0	0
90	F	8	F10d	1	0	0	0	0	0	0	0	0	0	0												1	0	1	1	1	1	0	0	0	0	1												0	0
91	F	5	F5d
92	F	5	F5d	0	0	0	0	0	0	0																0	0	1	1	1	1	0																0	0
93	M	5	F5d	1	1	0	0	0	0	0	0															0	0	1	0	1	0	0	0															0	0
94	M	8	F10d	0	0	0	0	0	0	0	0	0	0	0	0	0	0	0	0	0	0					0	1	0	0	0	0	0	0	0	0	0	0	0	0	0	0	0	0					0	0
95	F	6	F5d		0	1	0	0	0	0	0	0															0	0	1	0	0	0	0	0															0
96	F	13	F15d	0	0	0	0	0	1	0	0	0	0	0	0	0	0	0	0							0	0	0	0	0	0	0	0	0	0	0	0	0	0	0	1							1	1
97	M	8	F10d	0	1	1	1	1	1	0	0	1	1													1	0	0	1	0	0	0	0	0	0													0	0
98	F	7	F5d	0	1	1	0	0	0	0	0	0	0	0												1	0	1	0	1	0	0	0	1	0	0												0	0
99	M	9	F10d	1	1	0	0	0	0	0	0	1	0	0	0	0	0									1	0	1	0	0	0	0	0	0	0	0	0	0	0									1	0
100	F	9	F10d	0	0	0	0	0	0	0	0	0	0	0	0		0									0	0	0	0	0	0	0	0	0	0	0	0		0									0	0
101	F	6	F5d		1	1	1	0	0	0	0	0															1	1	0	1	1	1	0	1															0
102	F	9	F10d
103	F	9	F10d	0	1	0	0	0	0	0	0	0	0	0	0	0										0	0	0	0	0	0	0	0	0	0	0	0	0										0	0
104	F	13	F15d	0	0	0	0	0	0	0	0	0	0	0	0	0	0	0	0							0	0	0	0	0	0	0	0	0	0	0	0	0	0	0	0							0	0
105	M	13	F15d	0	0	0	0	0	0	0	0	0	0	0	0	0	0	0	0	0						0	0	0	0	0	0	0	0	0	0	0	0	0	0	0	0	0						0	1
106	F	5	F5d	1	0	1	1	0	0	0																0	0	1	0	0	0	0																0	0
107	F	6	F5d
108	F	5	F5d	0	1	1	1	1	1	1																1	0	1	1	0	0	0																0	0
109	M	14	F15d	1	1	1	1	1	0	1	0	0	0	0	1	1	1	1	1	1						0	0	0	1	1	1	1	1	1	1	1	1	1	1	1	1	1						0	0
110	F	6	F5d		0	0	0	0	0	0	0	0	0														1	1	1	1	1	1	1	0	0														0
111	M	7	F5d	1	1	1	0	1	0	0	0	0														0	0	0	0	0	0	0	0	0														0	1
112	F	7	F5d	0	0	0	0	0	0	0	0	0	0	0												0	1	0	1	1	1	0	0	1	0	1												0	0
113	M	6	F5d	0	1	1	1	1	0	0	0	0	0	0												0	1	1	0	1	1	1	1	1	1	1												0	0
114	M	5	F5d	0	1	0	0	0	1	1																0	0	0	0	0	0	0																1	0
115	F	5	F5d	0	1	1	0	0	0	1																0	0	1	0	1	0	0																0	0
116	F	9	F10d	1	1	1	1	1	1	1	1	0	0	0	0	0										1	1	1	1	1	1	1	1	1	1	1	1	0										1	1
117	M	5	F5d	0	0	0	0	0	0	0																0	0	0	0	0	0	0																0	1
118	M	7	F5d	1	0	0	0	0	0	0	0	0														0	1	1	1	0	1	1	0	0														0	0
119	F	5	F5d	0	1	0	0	0	0	0	0															1	1	1	1	0	0	1	1															0	0
120	M	4	F5d	0	0	0	0	0	0	0																0	0	0	0	0	0	0																0	0
121	F	5	F5d	0	1	0	0	1	0	0	0															0	0	1	0	0	0	0	0															0	0
122	M	7	F5d
123	F	5	F5d	1	1	0	0	0	0	0																0	0	0	0	0	0	0																0	0
124	M	7	F5d	0	0	0	0	0	0	0	0	0	0													0	1	0	0	1	1	1	0	1	0													0	0
125	M	7	F5d
126	M	14	F15d	0	0	0	0	0	0	0	0	0	0	0	0	0	0	0	0	0						0	0	0	0	1	0	0	0	0	0	0	0	0	0	0	0	0						0	0
127	F	4	F5d	0	1	0	1	1	0	0																1	1	0	1	1	1	1																1	0
128	F	7	F5d	0	1	1	0	0	0	0	0	0	0													0	0	0	0	0	0	1	0	0	0													0	0
129	F	5	F5d	0	1	1	0	0	0	0	0															0	0	0	0	0	1	0	0															0	0
130	F	14	F15d	0	1	0	1	1	0	0	0	0	0	0	0	0	0	0	0	0						0	1	1	1	1	1	1	1	1	1	0	1	1	1	1	1	1						0	0
131	M	5	F5d	0	0	0	1	1	1	1	0															0	0	0	0	1	1	1	1															0	0
132	F	5	F5d	0	0	0	0	0	0	0	0															0	0	0	0	0	0	0	0															1	1
133	M	14	F15d
134	F	10	F10d	0	0	0	0	0	0	0	0	0	0	0	0	0	0	0								1	0	0	0	1	0	0	0	0	0	0	0	0	0	0								0	0
135	F	14	F15d		0	1	0	0	0	0	0	0	0	0	0	0	0	0	0	0	0	0	0	0	0		0	1	0	0	0	0	0	0	0	0	0	0	0	0	0	1	0	0	0	0	1		0
136	M	8	F10d	0	0	0	0	0	0	0	0	0	0	0												0	1	0	1	0	0	0	0	0	0	0												0	0
137	F	8	F10d	0	1	0	0	0	0	0	0															0	1	1	1	1	0	0	0															0	0
138	M	6	F5d	0	0	1	0	0	0	0	0	0	0													1	1	1	1	1	1	1	1	1	0													0	0
139	M	5	F5d	1	1	0	0	0	0	1																1	1	1	1	1	1	1																1	1
140	F	6	F5d	1	1	1	0	0	0	0	0	0	0													0	1	1	1	1	1	0	0	0	0													0	0
141	F	13	F15d	0	0	0	0	0	0	0	0	0	0	0	0	0	0	0	0							0	1	1	0	0	0	0	0	0	0	0	0	0	0	0	0							0	1
142	F	11	F10d	1	1	1	1	0	0	0	0	0	0	0	0	0	0									1	0	1	1	0	0	0	0	0	0	0	0	0	0									0	0
143	F	11	F10d	0	1	0	0	0	0	0	0	0	0	0	0	0	0									0	0	0	0	0	0	0	0	0	0	0	0	0	0									0	0
144	F	10	F10d	1	1	0	0	0	0	0	0	0	0	0	0	0										1	0	0	0	0	0	0	0	0	0	0	0	0										0	0
145	M	21	F20d	1	0	0	0	0	0	0	0	0	0	0	0	0	0	0	0	0	0	0	0	0	0	1	1	0	0	1	0	0	0	0	0	0	0	0	0	0	0	0	1	1	1	0	0	1	1
146	F	14	F15d	0	0	0	0	0	0	0	0	0	0	0	0	0	0	0	0							0	0	0	0	0	0	0	0	0	0	0	0	0	0	0	0							0	0
147	M	5	F5d	1	1	1	0	0	0	0																0	1	1	1	0	0	0																0	0
148	F	6	F5d	0	0	0	0	0	0	0	0	0	0													0	0	1	0	0	1	0	0	0	0													0	0
149	M	5	F5d	0	1	1	1	0	0	0	0															1	1	1	1	1	0	0	0															0	1
150	M	14	F15d	0	0	0	0	0	0	0	0	0	0	0	0	0	0	0	0	0						0	0	0	0	0	0	0	0	0	0	0	0	0	0	0	0	0						0	0
151	F	10	F10d	0	0	0	0	0	0	0	0	0	0	0	0	0	0									1	1	0	0	1	1	1	1	1	1	1	1	1	1									0	0
152	F	21	F20d	1	0	0	0	0	0	0	0	0	0	0	0	0	0	0	0	0	0	0	0	0	0	0	1	1	1	0	0	0	0	1	0	0	0	0	0	0	1	0	0	0	0	0	0	0	0
153	M	8	F10d	0	0	0	0	0	0	0	0	0	0	0												1	1	1	1	1	0	1	0	0	1	1												0	0
154	M	7	F5d	1	1	0	0	0	0	0	0	0														0	0	0	0	0	0	0	0	0														0	0
155	F	6	F5d	0	0	0	0	0	0	0	0	0	0													0	0	0	0	1	0	0	0	0	0													0	0
156	M	6	F5d	0	0	1	0	0	0	0	0	0	0													0	0	1	1	1	1	1	0	0	0													0	1
157	F	5	F5d	1	1	0	0	1	0	0	0	0														1	1	1	1	1	1	0	0	0														1	0
158	F	14	F15d	0	0	0	0	0	0	0	0	0	1	0	0	0	0	0	0	0						0	1	0	1	0	0	0	0	1	1	0	0	0	0	0	0	0						0	0
159	F	5	F5d	0	1	1	0	0	0	0																0	0	0	0	0	0	0																0	0
160	F	5	F5d	1	0	1	0	0	0	0																1	1	1	1	1	1	1																0	0
161	F	4	F5d	0	1	1	0	0	0	0																0	0	0	0	0	0	0																0	0
162	F	9	F10d	1	1	0	0	0	0	0	0	0	0	0	0											0	0	0	0	0	0	0	0	0	0	0	0											0	0
163	F	18	F20d	1	0	0	0	0	0	0	0	0	0	0	0	0	0	0	0	0	0	0	0			0	0	0	0	0	0	0	0	0	0	0	0	0	0	0	0	0	0	0	0			0	0
164	M	14	F15d	0	0	0	0	0	0	0	0	0	0	0	0	0	0	0	0	1						0	0	0	0	0	0	0	0	0	0	0	0	0	0	0	0	0						0	0
165	F	14	F15d	0	1	1	0	0	0	0	0	1	1	1	0	0	0	0	0	0						0	0	1	0	0	0	1	1	1	1	1	1	1	1	1	1	1						0	0
166	F	14	F15d	1	1	0	0	0	0	0	0	0	0	0	0	0	0	0	0	0						1	0	0	0	1	0	0	0	0	0	0	0	0	0	0	0	0						0	0
167	F	5	F5d	1	0	0	0	0	0	0																0	0	0	0	0	0	0																0	1
168	F	6	F5d	1	1	1	1	0	0	0	1	0	0	0												1	0	1	1	1	1	0	0	0	0	0												0	0
169	M	9	F10d	0	0	0	0	0	0	0	0	0	0	0	0	0										0	0	0	0	0	0	0	0	0	0	0	0	0										0	0
170	F	9	F10d	0	1	0	0	0	0	0	0	0	0	0	0	0										0	0	0	0	0	0	0	0	0	0	0	0	0										0	0
171	M	8	F10d	0	0	0	0	0	0	0	0	0	0	0												0	0	0	0	1	1	1	1	1	1	0												0	0
172	F	6	F5d	1	1	1	0	0	0	0	0															0	0	0	0	0	0	0	0															0	0
173	F	8	F10d	0	1	1	1	0	0	0	0	0	0													0	0	0	0	0	0	0	0	0	0													0	1
174	F	14	F15d	1	0	1	1	0	0	0	0	0	0	0	0	0	0	0	0							1	1	1	0	0	0	0	0	0	0	0	0	0	0	0	0							0	0
175	M	7	F5d	0	0	0	0	0	0	0	0	0	0													0	0	0	0	0	0	0	0	0	0													0	0
176	F	9	F10d	0	0	0	0	0	0	0	0	0	0													0	0	0	0	0	0	0	0	0	0													0	0
177	F	4	F5d	0	1	0	0	0	0																	0	0	0	0	0	0																	1	0
178	F	8	F10d	0	0	0	0	0	0	0	0	0	0													1	1	1	1	0	0	0	1	0	0													0	1
179	F	8	F10d	1	0	0	0	0	0	0	0	0	0													0	0	0	0	0	0	0	0	0	0													0	1
180	F	14	F15d	0	0	0	0	0	0	0	0	0	0	0	0	0	0	0	0							0	0	0	0	0	0	0	0	0	0	0	0	0	0	1	0							0	0
181	M	14	F15d	1	0	0	0	0	0	0	0	0	0	0	0	0	0									0	0	0	0	0	0	0	0	0	0	0	0	0	0									0	0
182	M	4	F5d	0	0	0	0	0	0	0																0	0	0	0	0	0	0																0	0
183	M	4	F5d	0	0	0	0	0	0	0	0															0	0	0	0	0	0	0	0															0	0
184	F	6	F5d	1	1	0	0	0	0	0	0	0														0	0	0	0	0	0	1	1	1														0	0
185	M	7	F5d	0	0	0	0	0	0	0	0	0	0													0	1	1	1	1	1	1	1	0	0													0	0
186	F	5	F5d	0	1	0	0	1	0	1																1	1	1	1	1	1	1																0	0
187	F	5	F5d	0	0	0	0	0	0	0																0	0	0	0	0	0	0																0	0
188	M	19	F20d	0	0	0	0	0	0	0	0	0	0	0	0	0	0	0	0	0	0	0	0	0	0	0	0	0	0	0	0	0	0	0	0	0	0	0	0	0	0	0	0	0	0	0	0	0	0
189	F	7	F5d
190	M	6	F5d	0	1	1	1	0	1	0	0															0	0	0	1	0	0	0	0															0	1
191	F	6	F5d	1	1	0	1	0	0	0	0															0	0	0	0	1	0	0	0															0	0
192	F	6	F5d
193	F	9	F10d	0	0	0	0	0	0	0	0	0	0	0												0	0	0	0	0	0	0	0	0	0	0												0	0
194	M	5	F5d	0	0	0	0	0	0	0	0															0	0	1	1	1	1	0	0															0	0
195	F	5	F5d	0	0	0	1	0	1	0	0															1	0	1	1	1	1	1	0															0	0
196	M	5	F5d	0	0	0	0	0	0	0																0	0	0	0	0	0	0																0	0
197	M	9	F10d		0	0	0	0	0	0	0	0	0	0	0	0	0										0	0	0	0	0	0	0	0	0	0	0	0	0										0
198	F	12	F10d	0	0	0	0	0	0	0	0	0	0	0	0	0	0									0	1	0	1	0	0	0	1	0	1	0	0	0	0									1	0
199	M	21	F20d	0	0	0	0	0	0	0	1	0	0	0	0	0	0	0	0	0	1	0	0	0	0	0	0	0	0	0	0	0	0	0	0	0	0	0	0	0	0	0	0	0	0	0	0	0	0
200	M	10	F10d
201	F	5	F5d	1	1	0	0	0	0	0	0	0	0													0	0	0	1	1	1	0	1	0	1													0	0
202	F	13	F15d	1	1	0	0	0	0	0	0	0	0	0	0	0	0	0								1	1	1	0	1	1	1	1	0	0	0	0	0	0	0								0	0
203	F	6	F5d		0	0	1	1	0	0	0	0	0	0	0												0	1	1	0	0	0	0	0	0	0	0												0
204	M	6	F5d	0	0	0	0	0	0	0	0	0														0	0	0	0	0	0	0	0	0														0	0
205	F	8	F10d	1	0	0	0	0	0	1	0	0	0													1	0	1	0	1	1	0	0	0	0													1	0
206	F	8	F10d				0																						0
207	F	8	F10d	1	1	0	0	0	1	1	1	0	0	0												0	0	0	0	0	1	1	1	0	0	0												0	0
208	M	7	F5d	0	0	0	0	0	0	0	0	0	0	0												1	0	0	0	0	0	0	0	0	0	0												0	0
209	F	13	F15d
210	F	9	F10d	0	0	1	0	0	0	0	0	0	0	0	0	0	0									0	0	0	0	0	0	1	0	1	0	0	1	0	0									0	0
211	F	10	F10d
212	F	14	F15d	1	0	1	0	1	0	1	1	1	1	0	0	0	0	0	1	0	0	0				1	0	1	1	1	1	1	1	1	1	1	1	1	0	0	1	1	0	0				0	0
213	F	14	F15d	1	1	1	0	0	0	0	0	1	0	1	0	0	0	0	0	0	1					0	0	0	1	1	1	0	1	1	1	1	0	0	0	0	0	0	0					0	1
214	M	14	F15d	0	0	0	0	0	0	0	0	0	0	0	0	0	0	0	0							0	0	0	0	0	0	0	0	0	0	0	0	0	0	0	0							0	0
215	F	9	F10d	0	0	0	0	0	0	0	0	0	0	0	0	0										0	0	0	1	1	0	1	0	1	0	0	0	0										0	0
216	M	8	F10d	0	0	0	0	0	0	0	0	0	0	0	0											0	0	0	0	0	0	0	0	0	0	0	0											0	0
217	F	9	F10d	1	1	0	0	0	0	0	0	0	0	0	0											1	1	0	1	0	0	0	0	0	1	1	0											0	0
218	M	7	F5d	0	0	0	0	0	0	0	0	0														0	0	0	0	0	0	0	0	0														0	0
219	F	21	F20d	0	0	0	0	0	0	0	0	0	1	1	0	1	1	1	1	0	0	0	0	0	0	0	0	1	1	0	0	0	0	0	0	0	0	0	0	0	0	1	0	0	0	0	0	0	0
220	F	7	F5d	0	0	0	0	0	0	0	0	0														1	1	1	1	1	1	1	1	1														0	0
221	F	15	F15d	0	0	0	0	0	0	0	0	0	0	0	0	0	0	0	0	0	0	0				0	0	0	0	0	0	0	0	0	0	0	0	0	0	0	0	0	0	0				1	1
222	M	14	F15d	1	0	0	0	0	0	0	0	0	0	0	0	0	0	0	0	0	0					0	0	0	0	0	0	0	0	0	0	0	0	0	0	0	0	0	0					1	0
223	M	5	F5d	0	0	0	0	0	0	0	0	0	0													0	0	0	0	0	0	0	0	0	0													0	0
224	M	5	F5d	1	0	0	1	0	0	0	0															0	1	1	0	1	1	1	1															0	0
225	M	10	F10d	0	0	0	0	0	0	0	0	0	1	0	0	0										1	0	1	1	1	1	1	1	1	0	1	0	1										0	0
226	F	11	F10d	0	0	1	0	0	0	0	1	0	0	0	0	0	0	0								0	0	1	1	1	1	1	1	0	0	1	1	1	0	0								0	0
227	M	11	F10d	0	0	0	0	0	0	0	0	0	0	0	0	0	0	0								0	1	1	0	0	1	0	0	0	0	0	0	0	0	0								0	0
228	M	12	F10d	0	0	0	0	0	0	0	0	0	0	0	0	0	0	0								0	0	0	0	0	0	0	0	0	0	0	0	0	0	0								0	0
229	M	10	F10d	1	1	0	0	1	0	0	0	0	0	0	0	0										0	0	0	0	1	1	1	1	1	1	1	1	1										0	0
230	F	10	F10d	0	1	0	0	0	0	0	0	0	0	0	0	0										0	1	1	1	1	1	1	1	1	1	0	0	0										0	0
231	F	6	F5d	0	0	1	0	0	0	0	0	0	0													0	0	0	0	0	0	0	0	0	0													0	0
232	M	6	F5d	0		0		0		0		0														0		0		0		0		0														0
233	M	4	F5d
234	M	9	F10d							0	0	0	0	0	0	0																0	0	0	0	0	0	0
235	M	5	F5d	1	0	0	0	0	0	0	0															0	0	0	0	0	0	0	0															0	0
236	F	10	F10d	1	1	1	0	0	0	0	0	0	0	0	0	0										0	1	0	0	0	0	0	0	0	0	0	0	0										1	1
237	F	10	F10d													0																						0
238	M	6	F5d	1	1	1	1	0	0	0	0	0														1	1	1	0	1	1	1	1	0														0	0
239	M	8	F10d	0	0	0	0	0	0	0	0	0	0	0	0	0	0									0	0	0	0	0	0	0	0	0	0	0	0	0	0									0	0
240	M	11	F10d	0	1	1	0	0	0	0	0	0	1	0	0	0	0	0								0	0	0	0	0	0	1	0	0	0	0	0	0	0	0								0	0
241	M	5	F5d	1	1	0	1	0	0	0	0	0	0													0	0	1	0	1	1	1	1	1	0													0	0
242	F	5	F5d	1	0	0	0	0	0	0	0	0	0													0	0	1	1	1	1	1	1	1	1													0	0
243	M	5	F5d	0	1		0	0	0	0	0															0	0		0	0	0	0	0															0	0
244	F	5	F5d	1	0	1	0	0	0	0																0	0	1	0	0	1	0																0	0
245	M	5	F5d	0	0	0	0	0	0	0																0	1	0	0	0	0	0																0	1
246	F	6	F5d	0	0	1	1	0	0	0	0	0	0													0	0	1	1	1	1	1	0	0	0													0	0
247	F	8	F10d	1	1	1	1	0	1	0	1	1	1	0												1	1	1	1	0	0	0	1	1	0	0												0	0
248	M	5	F5d
249	M	9	F10d
250	M	9	F10d	1	0	0	0	0	0	0	0	0	0	0	0											0	0	0	0	1	0	0	0	0	0	0	0											0	0
251	M	5	F5d	1	0	0	0	0	0	0																0	0	0	0	0	0	0																0	0
252	F	5	F5d	1	1	1	0	1	0	0																1	0	1	0	0	0	0																0	0
253	F	9	F10d	0	1	0	0	0	0	0	0	0	0	0	0	0	0	0								0	0	0	0	0	0	0	0	0	1	1	0	0	0	0								0	0
254	F	9	F10d	0	1	0	0	0	0	0	0	0	0	0	0											0	0	0	0	1	0	0	1	1	1	1	1											0	0
255	M	21	F20d	0	0	0	0	0	0	0	0	0	0	0	0	0	0	0	0	0	0	0	0	0	0	0	0	0	0	0	0	0	0	0	0	0	0	0	0	0	0	0	0	0	0	0	0	0	0
256	M	6	F5d	1	1	1	1	0	0	0	0															0	0	0	0	0	0	0	0															0	0
257	M	8	F10d	1	1	1	0	1	1	1	0	1	1													1	1	0	1	1	1	1	1	1	1													0	0
258	F	8	F10d	1	1	1	1	1	1	0	0	1	0													1	0	0	0	0	0	0	1	0	0													0	0
259	F	12	F10d	0	1	0	0	0	0	0	0	0	0	0	0	0	0									0	0	1	0	0	0	0	0	0	0	0	0	0	0									0	0
260	F	16	F15d	0	0	0	0	0	1	0	0	0	0	0	0	0	0	0	1	0	0	0				0	0	0	0	0	0	0	1	0	0	0	0	0	0	0	0	0	0	0				0	0
261	F	5	F5d	0	0	1	1	0	0	0	0	0	0													0	0	0	0	0	0	0	0	0	0													0	0
262	F	14	F15d		0	0	0	0	0	0	0	0	0	0	0	0	0	0	0								0	0	0	0	0	0	0	0	0	0	0	0	0	0	0								0
263	F	9	F10d	1	1	0	0	0	0	0	0	0	1	0	0	0	0									1	1	0	0	0	0	0	0	0	0	1	0	0	0									0	0
264	F	9	F10d	1	1	0	0	0	0	0	0	0	0	0	0	0	0									0	0	1	1	1	0	0	0	0	0	0	0	0	0									0	0
265	M	14	F15d	0	1	0	0	0	0	0	0	0	0	0	0	0	0	0	0							0	0	0	0	0	0	0	0	0	0	0	0	0	0	0	0							0	0
266	F	8	F10d	0	0	0	0	0	0	0	0	0	0	0												0	0	0	1	0	0	0	0	0	1	0												0	0
267	F	16	F15d	1	1	0	0	0	1	0	0	0	0	0	0	0	0	0	0	0	0					1	1	0	0	0	0	0	0	0	0	0	0	0	0	0	0	0	0					0	0
268	F	14	F15d	0	1	0	0	0	0	0	0	0	0	0	0	0	0	0	0	0						0	0	0	1	0	0	0	0	0	0	0	1	0	0	0	1	0						0	0
269	F	9	F10d	0	1	1	0	0	0	0	0	0	0	0												1	0	0	0	1	0	0	1	1	0	0												1	0
270	F	8	F10d	0	0	0	0	0	0	0	0	0	0	0												0	0	0	1	1	1	1	0	0	0	0												0	0
271	M	8	F10d	0	0	0	0	0	0	0	0	0	0	0												0	0	0	0	0	0	0	0	0	0	0												0	0
272	M	8	F10d	1	0	0	0	0	0	0	0	0	0	0	0											0	0	0	0	0	0	0	0	0	0	0	0											1	0
273	F	6	F5d	1	0	1	0	0	0	0	0															0	0	0	1	0	0	0	0															1	0
274	M	5	F5d			0	0	0	1	0	0	0	0															0	0	0	1	0	0	0	0
275	M	8	F10d	0	0	0	0	0	0	0	0	0	0													0	0	0	0	0	0	0	0	0	0													0	0
276	F	8	F10d	1	0	0	0	0	0	0	0	0	0													0	0	0	0	0	0	0	0	0	0													0	0
277	F	6	F5d	0	0	0	0	0	0	0	0															0	0	0	0	0	0	0	0															0	0
278	M	13	F15d	0	0	0	0	0	0	0	0	0	0	0	0	0	0	0	0							0	0	0	0	0	0	0	0	0	0	0	0	0	0	0	0							0	0
279	M	8	F10d	0	0	0	0	0	0	0	0	0	0													0	0	0	0	0	0	0	0	0	0													0	0
280	F	8	F10d	0	0	0	0	0	0	0	0	0	0													0	0	0	0	0	0	0	0	0	0													0	0
281	M	14	F15d	1	0	0	0	0	0	0	0	0	0	0	0	0	0	0	0	0						0	0	0	0	0	0	0	0	0	0	0	0	0	0	0	0	0						0	0
282	F	14	F15d	0	0	0	0	0	0	0	0	0	0	0	0	0	0	0	0	0	0					1	0	0	1	1	1	0	0	0	0	1	0	0	0	0	0	0	0					0	0
283	M	14	F15d	0	0	0	0	0	0	0	0	0	0	0	0	0	0	0	0	0	0					0	0	0	0	0	0	0	0	0	0	0	0	0	0	0	0	0	0					0	0
284	F	8	F10d	1	1	1	1	0	0	0	0	0	0	0												0	0	0	0	0	0	0	0	0	0	0												0	0
285	M	8	F10d	0	1	1	1	0	0	1	0	0	0	0												0	0	0	0	0	0	0	0	0	0	0												0	0
286	M	6	F5d	0	1	0	0	0	0	0	0															0	0	0	1	0	0	0	0															1	1
287	M	6	F5d	0	0	0	1	0	0	0	0															0	0	0	1	0	0	0	0															1	1
288	F	6	F5d	0	1	0	0	0	0	0	0	0	0													0	1	1	0	1	0	0	0	1	0													0	0
289	F	5	F5d
290	M	14	F15d	0	1	1	0	0	0	0	0	0	0		0	0	0	0	0	0	0	0				0	0	0	0	0	0	0	0	0	0		1	1	1	1	1	0	0	0				0	0
291	F	14	F15d	0	0	1	0	0	0	0	0	0	0	0	0	0	0	0	0	0						0	1	0	0	1	0	0	1	0	0	0	0	0	0	0	0	0						0	0
292	M	8	F10d	0	0	0	0	0	0	0	0	0	0	0												0	0	0	0	0	0	0	0	0	0	0												0	0
293	M	6	F5d	0	0	0	0	0	0	0	0	0	0													0	0	0	0	0	0	0	0	0	0													0	0
294	M	6	F5d	1	1	0	1	0	0	0	0	0	0													0	1	1	1	0	0	1	1	1	0													0	0
295	F	5	F5d	1	1	0	0	0	0	0																0	0	0	0	0	1	0																0	0
296	M	5	F5d	1	1	0	0	0	0																	0	0	0	0	1	0																	0	0
297	M	13	F15d	0	0	0	0	0	0	0		0	0	0	0	0	0	0	0	0						0	0	0	0	0	0	0		0	0	0	0	0	0	0	0	0						0	0
298	F	12	F10d	1	1	0	1	1	0	0	0	0	0	0	0	0	0	0								0	0	0	0	0	0	0	0	0	0	0	0	0	0	0								0	0
299	M	8	F10d	1	1	1	0	0	0	0	0	0	0													1	0	0	0	0	0	1	0	0	0													1	0
300	M	10	F10d	0	0	0	0	0	0	0	0	0	0	0	0											0	0	0	1	0	0	0	0	0	0	0	0											0	0
301	F	5	F5d
302	F	9	F10d	1	1	1	0	0	0	0	0	0	0	0	0											0	0	1	0	1	1	0	1	1	1	0	0											0	0
303	F	5	F5d		0	0		0	0	0	0	0															0	0		0	0	0	0	0															0
304	M	5	F5d			0																						0
305	F	5	F5d	0	0	0	0	0	0	0																0	0	1	0	1	1	0																0	0
306	F	4	F5d	0	1	0	0	0	0	0																0	0	0	0	1	0	0																1	0
307	M	8	F10d	0	1		0	0	0	0	0	0	0	0												0	0		0	0	0	0	0	0	0	0												0	0
308	F	9	F10d	0	1	1	0	0	0	0	0	0	0	0	0	0										0	0	0	1	1	0	1	0	1	1	1	1	1										0	0
309	M	8	F10d	0	0	0	0	0	0	0	0	0	0													0	0	1	0	0	0	0	0	0	0													0	0
310	M	8	F10d	0	0	0	0	0	0	0	0	0	0													0	0	0	0	0	1	1	1	1	1													0	0
311	M	8	F10d	0	0		0		0		0	0	0													0	0		0		0		0	1	0													0	0
312	M	14	F15d	0	0	0	1	1	0	0	0	0	0	0	0	0	0	0	0	0						0	0	1	0	1	1	1	1	0	0	0	0	0	0	0	0	0						0	0
313	F	8	F10d	1	0	0	0	0	0	0	0	0														1	1	1	1	0	0	0	1	0														0	0
314	M	7	F5d	0	0	0	0	0	0	0	0															0	0	0	0	0	0	0	0															0	0
315	F	7	F5d			0		0	0	0	0																	0		0	0	0	0
316	F	8	F10d	0	0	0	0	0	0	0	0	0	0													0	0	0	0	0	0	0	0	0	0													0	0
317	F	5	F5d	0	0	0	0	0	0	0	0															0	0	0	0	0	0	0	0															0	0
318	M	5	F5d	1	1	1	1	0	1	1																0	0	0	1	1	0	0																0	0
319	M	5	F5d	1	1	0	0	0	0	0																0	0	0	0	0	0	0																0	0
320	F	5	F5d	0	0	0	0	0	0	0																0	0	0	0	0	0	0																0	0
321	F	8	F10d	0	0	0	0	0																		0	0	0	0	0																		0	0
322	M	8	F10d		0	0	0	0	0		0	0	0	0													0	0	0	0	0		0	0	0	0													0
323	M	5	F5d	0	0	1	0	0	0	0	0															0	0	0	0	0	0	0	0															1	0
324	M	7	F5d
325	F	7	F5d	1	1	1	1	0				0	0	0												0	0	0	0	0				0	0	0												0	0
326	F	7	F5d
327	F	7	F5d	0	0	0	0	0	0	0		0														0	0	0	0	0	0	0		0														0	0
328	F	5	F5d	1	1	0	0	0	0	0	0															0	0	0	0	0	0	0	1															0	0
329	F	12	F10d	1	0	0	0	0	0	0	0	0	0	0	0	0	0	0	0	0						0	0	0	0	0	0	0	0	0	0	0	0	0	0	0	0	0						0	0
330	M	5	F5d	0	0	0	0	0	0	0	0															0	0	0	0	0	0	0	0															0	0
331	F	10	F10d	0	0	0	0	0	0	0	0	0	0	0	0	0	0									0	1	1	1	1	1	0	1	1	1	1	1	1	0									0	1
332	F	9	F10d	0	0	0	0	0	0	0	0	0	0	0	0											0	0	0	0	0	0	0	0	0	0	0	0											0	0
333	F	8	F10d	0	0	0	0	0	0	0	0	0	0	0	0											0	0	0	0	0	0	0	0	0	0	0	0											0	0
334	M	8	F10d	1	1	1	0	0	0	0	0	0	0	0												0	1	1	0	1	0	0	0	0	0	0												1	0
335	F	5	F5d		1	0	0	0	0	0	0																0	0	0	0	1	0	0																0
336	F	4	F5d	0	1	0	0	0	0	0																1	1	0	0	0	0	0																0	0
337	M	5	F5d	1	1	0	0	0	0	0																1	1	1	1	1	1	0																0	0
338	F	7	F5d	0	0	0	0	0	0	0	0	0	0	0	0											1	1	1	1	0	0	0	1	0	1	1	0											0	0
339	F	8	F10d	1	0	0	0	0	0	0	0	0	0													0	0	1	0	0	0	0	0	0	0													0	0
340	M	7	F5d	0	0	0	0	0	0	0	0	0	0													0	0	0	0	0	0	0	0	0	0													0	0
341	F	6	F5d	0	0	0	0	0	0	0	0	0	0	0												0	0	0	0	0	0	0	0	0	0	0												0	1
342	F	5	F5d	1	1	1	1	1	1	0	0															0	0	1	1	0	1	1	1															0	0
343	F	5	F5d	1	0	0	1	0	0	0	0															0	0	0	1	1	0	1	0															1	1
344	F	5	F5d	1	1	0	0	1	0	0	1															0	0	1	1	0	0	1	1															1	0
345	F	7	F5d	0	1	1	1	0	0	0	0	0	0													1	0	0	0	0	1	1	0	1	1													0	0
346	F	8	F10d	1	1	1	1	1	1	1	1	0	0													1	1	1	1	1	1	1	0	1	0													0	0
347	M	8	F10d	0	0	0	0	0	0	0	0	0	0													0	0	0	0	0	0	0	0	0	0													0	0
348	F	7	F5d	0	1	0	1	0	0	0	0	0	0													0	0	0	0	1	0	0	0	0	0													0	0
349	M	8	F10d
350	M	5	F5d	1	0	0	0	0	0	0																0	0	1	0	0	0	0																0	1
351	M	5	F5d	1	0	0	0	0	0	0																0	0	0	0	0	0	0																1	1
352	F	5	F5d
353	F	8	F10d	0	0	0	0	0	0	0		0														0	0	0	0	0	0	0		0														0	0
354	F	8	F10d	0	1	1	1	1	0	0	0	0	0													1	0	1	1	0	1	0	1	1	1													1	1
355	M	11	F10d	0	0	0	0	0	0	0	0	0	0	0	0	0										0	0	0	0	0	0	0	0	0	0	0	0	0										0	0
356	M	6	F5d	0	0	0	0	1	1	0	0	0	0	0												0	0	0	0	0	0	0	0	0	0	0												0	0
357	F	4	F5d	1	0	0	0	0	0	0	0															0	0	0	0	1	1	0	0															0	0
358	F	8	F10d	0	0	0	0	0	0	0	0	0	0	0												0	0	0	0	0	0	0	0	0	0	0												1	1
359	M	6	F5d		1	0	1	0	0	0	0																1	0	1	0	0	0	0																0
360	F	5	F5d	1	0	0	0	0	0	0	0															0	0	1	1	1	1	1	1															0	0
361	F	5	F5d	0	1	0		0	0	0	0															0	0	0		0	0	0	0															0	0
362	M	6	F5d	0	1	0	0	0	0	0	0	0	0													0	0	0	0	0	0	0	0	0	0													0	0
363	F	5	F5d	1	1	0	0	0	1	0	0															0	1	0	1	0	0	0	0															0	0
364	F	8	F10d	0	0	0	0	0	1	0	0	0	0	0												0	1	1	1	0	0	0	0	0	0	1												0	0
365	M	8	F10d	1	1	1		1	0	0	0	0	0	0												0	0	1		1	1	0	0	0	0	0												0	0
366	F	5	F5d	1	0	0	0	0	0	0																0	1	1	0	1	0	0																0	0
367	M	8	F10d		1	1	0	0	0	0	0	0	0	0	0												0	0	1	1	0	0	1	0	0	0	0												1
368	M	14	F15d	1	1	0	0	1	0	0	0	1	0	0		0	0	0	0							0	1	1	0	0	0	0	0	0	0	0		0	0	0	0							0	0
369	F	10	F10d	0	0	0	0	0	0	0	0	0	0	0	0	0	0	0								0	0	0	1	1	1	1	1	1	0	1	1	1	0	1								0	0
370	F	16	F15d	1	1	1	0	0	0	1	0	0	0	0	0	0	0	1	0	0	1	0	0			0	0	0	0	0	1	0	0	0	0	0	0	0	0	0	0	0	0	0	0			0	0
371	F	8	F10d	0	1	1	0	0	0	0	0	0	0	0												0	0	1	1	0	0	0	0	0	0	0												0	0
372	M	5	F5d	0	0	0	0	0	0	0	0															1	0	0	0	0	0	0	0															0	0
373	F	4	F5d
374	M	5	F5d	0	0	0	0	0	0	0	0															0	0	0	0	0	0	0	1															0	0
375	F	4	F5d	1	1	1	1	1	1	1																0	1	0	1	0	1	1																1	1
376	F	4	F5d	1	0	1	1	0	0	0																0	0	0	0	0	0	1																0	1
377	F	5	F5d	0	0	0	1	1	0	0	0	0	0													0	0	0	0	1	0	1	1	1	1													0	0
378	F	8	F10d	1	1	0	0	0	0	0	0	0	0	0												0	1	0	1	0	1	1	1	1	1	0												0	0
379	M	7	F5d	0	0	0	0	0	0	0	1		0	0												0	0	0	0	0	0	0	0		1	0												0	0
380	M	5	F5d	0	0	0	0	0	0	0	0															0	0	0	0	0	0	0	0															0	0
381	M	8	F10d		0	0		0	0	0		0	0														0	0		0	0	0		0	0														0
382	F	8	F10d		0	1	0	1	0	0	0	0	0														0	0	0	0	0	0	0	0	0														0
383	F	5	F5d	1	0	0	0	0	0	0	0															0	1	0	1	1	1	1	1															0	0
384	M	8	F10d	0	0	0	0	0	0	0	0	0	0													0	0	0	0	0	0	0	0	0	0													0	0
385	M	7	F5d	0	0	0	0	0	0	0		0	0													0	0	0	0	0	0	0		0	0													0	0
386	M	6	F5d
387	M	6	F5d	1	1	0	0	0	0	0	0	0	0													0	0	0	0	0	0	0	0	0	0													0	0
388	M	5	F5d
389	F	11	F10d	1	0	1	1	0	1	0	0	0	0	0	0	0										0	0	0	0	0	0	0	0	0	0	0	0	0										0	0
390	M	6	F5d	0	1	0	0	0	0	0	0															0	0	0	0	0	0	0	0															0	0
391	F	7	F5d		1	1	1																				0	0	0																				0
392	M	5	F5d	0	0	0	0	0	1	0																0	0	0	0	0	0	0																0	0
393	F	6	F5d	1	1	1	1	0	0	1	0	0	0													0	0	0	0	0	0	1	0	0	0													1	0
394	F	6	F5d	1	1	0	0	0	0	0	0	0	0													0	0	0	0	0	0	0	0	0	0													0	0
395	M	18	F20d			0	1	1	0	0	0	0	0	0		0	0			0	0	0	0	0	0			0	0	0	0	0	0	0	0	0		0	0			0	0	0	0	0	0
396	F	5	F5d	0	1	1	0	0	0	0	0															0	0	0	0	0	0	0	0															0	0
397	M	5	F5d	1	0	0	0	0	0	0																0	0	0	0	0	0	0																0	1
398	F	8	F10d
399	F	8	F10d	1	1	0	0	0	0	0	0	0	0	0												1	0	0	0	0	0	0	0	0	0	0												0	1
400	F	8	F10d	0	1	0	0	0	0	0	0	0	0													0	1	1	1	1	1	0	0	0	0													0	0
401	M	9	F10d	1	1	0	0	0	0	0	0	0	0	0												1	1	0	1	1	1	1	1	0	1	0												0	0
402	M	8	F10d
403	F	8	F10d	0	0	0	0	0	0	0	0	0	0													0	0	0	0	0	0	0	0	0	0													0	0
404	M	8	F10d
405	F	9	F10d	0	0	0	0	0	0	0	0	0	0	0	0											0	0	0	1	0	0	0	0	0	0	0	0											0	0
406	M	8	F10d	0	0	0	0	0	0	0	0	0	0													0	0	0	0	0	0	0	0	0	0													0	0
407	F	6	F5d
408	F	8	F10d
409	M	9	F10d
410	F	5	F5d	1	0	0	0	0	0	0																0	0	0	1	1	0	0																0	1
411	F	7	F5d	0	0	1	0	0	1	0	0	0	0	0												0	0	1	0	1	0	0	0	1	0	0												0	0
412	M	8	F10d	0	0	0	0	0	0	0	0	0	0	0												0	0	0	0	0	0	0	0	0	0	0												0	0
413	F	6	F5d	0	0	1	0	0	0	0	0	0	0	0												0	0	0	0	1	1	1	0	1	0	0												0	0
414	F	10	F10d
415	M	9	F10d	1	0	0	0	0	0	0	0	0	0	0	0											0	0	0	0	0	0	0	1	0	0	0	0											0	0
416	M	7	F5d	0	1	0	0	0	0	0	0	0	0													0	0	0	0	0	0	0	0	0	0													0	0
417	M	5	F5d	1	0	0	0	0	0	0	0															0	0	0	0	0	0	0	0															0	0
418	F	6	F5d	0	0	0	1	0	0	0	0	0	0													0	0	0	0	0	0	1	0	0	0													0	0
419	F	5	F5d	1	0	0	0	0	0	0																0	1	0	0	0	0	1																1	1
420	F	5	F5d	1	1	0	1	0	0	0																0	0	0	0	0	0	0																0	0
421	M	16	F15d	0	0	0	0	0	0	0	0	0	0	0	0	0	0		0	0	0	0				0	0	0	0	0	0	0	0	0	0	0	0	0	0		0	0	0	0				0	0
422	F	5	F5d	0	0	0	0	0	0	0																0	0	1	1	1	1	0																0	0
423	F	5	F5d	0	0	0	0	0	0	0																0	0	0	0	0	0	0																0	0
424	F	7	F5d
425	F	5	F5d	1	1	1	0	0	0	0																0	0	0	1	1	1	1																0	0
426	M	5	F5d	0	1	1	0	0	0	0																0	0	0	0	0	0	0																0	0
427	F	6	F5d	1	0	0	0	0	0	0	0															0	0	0	1	0	0	0	0															0	0
428	M	13	F15d	0	0	0	0	0	0	0	0	0	0	0	0	0	0	0								0	0	0	0	0	0	0	0	0	0	0	0	0	0	0								0	0
429	F	20	F20d	0	0	0	0	0	0	0		0	0	0												0	0	1	1	1	1	1		1	1	0												0	0
430	F	8	F10d	0	0	0	0	0	0	0	0	0	0	0												0	1	1	1	0	1	1	1	1	0	0												0	0
431	F	11	F10d	0	0	0	0	0	0	0	0	0	0	0	0	0	0									0	0	0	1	1	1	1	0	0	0	1	0	1	0									0	0
432	F	8	F10d	0	0	0	0		0			0														0	0	0	0		0			0														0	0
433	F	8	F10d	0	0	0	0	0	0	0	0	0	0													1	1	1	1	0	0	0	0	0	0													0	0
434	F	8	F10d
435	M	10	F10d	0	0	1	1	1	1	0																0	0	1	1	1	1	1																0	0
436	F	9	F10d	0	1	1	1	0	1	0	0	0	0	0												0	1	1	1	1	0	0	1	0	1	1												0	0
437	F	9	F10d	0	0	0	0	0	0	0	0	0	0	0	0											0	0	0	0	0	0	0	0	0	0	0	0											0	0
438	F	10	F10d	0	0	0	0	0	0	0	0	0	0	0	0	0										0	0	0	0	0	0	0	0	0	0	0	0	0										0	0
439	M	12	F10d		0	0	0	0	0	0	1	0	0	0	0	0	0	0									0	0	0	0	0	0	0	0	0	0	0	0	0	0									0
440	M	13	F15d			0	0		0	0	0	0	0	0	0	0	0	0	0	0								0	0		0	0	0	0	0	0	0	0	0	0	0	0
441	M	4	F5d	1	0	0	0	0	0																	0	0	0	0	0	0																	0	0
442	F	6	F5d		0	0	0	0	0	0	0																0	0	0	0	0	0	0																1
443	F	6	F5d		1	0	0		0	0	0	0	0														0	1	1		0	0	1	1	1														0
444	M	6	F5d	0	0	0	0	0	0	0	0	0	0													0	1	1	1	1	1	1	1	1	1													0	0
445	F	9	F10d
446	M	11	F10d
447	F	6	F5d	1	1	1	0	0	0	0	0															0	0	0	0	0	0	0	0															1	1
448	F	9	F10d		0	0	1	0	1	0		0	0	0	0												0	0	0	0	0	0		0	0	0	0												1
449	F	6	F5d	0	0	0	0	0	0	1	0															1	1	1	1	1	1	1	1															0	0
450	F	6	F5d
451	M	8	F10d	0	0	0	0	0	0	0	0	0	0													0	0	0	0	0	0	0	0	0	0													0	0
452	M	9	F10d		0	0	0	0	0	0	0	0	0	0	0	0	0										1	1	1	1	1	1	1	1	1	1	1	1	1										0
453	M	9	F10d
454	F	6	F5d	1	1	1	1	1	1	1		1	1													0	0	0	0	0	1	0		0	0													0	0
455	M	7	F5d	1	1	0		0	0	0	0															1	1	0		0	0	0	0															0	0
456	M	6	F5d	0	0	0	0		0	0	0															0	0	0	0		1	1	0															0	0
457	F	6	F5d	0	1	1	0	0	0	0	0															1	1	1	0	1	0	1	1															0	0
458	F	8	F10d		0	0	0	0	0	0	0		0	0	0	0											0	0	0	0	0	0	0		0	0	0	0											0
459	F	6	F5d
460	F	6	F5d	0	0	0	0	0	0	0	0	0	0													0	0	0	0	0	0	0	0	0	0													0	0
461	F	5	F5d	0	0	0	0	0	0	0	0															0	0	1	1	0	0	1	0															0	0
462	F	10	F10d	0	1	1	1	1	0	0	0	0	0	0	0	0										0	0	0	1	1	1	1	1	1	0	1	0	0										0	0
463	F	6	F5d	1	1	1	1	0	0	0																0	1	0	1	1	1	1																0	0
464	M	14	F15d	0	0	0	0	0	0	0	0	0	0	0	0	0	0	0	0	1		0				0	0	0	0	1	0	1	0	0	1	0	0	0	1	0	0	0		1				0	0
465	F	9	F10d	1	0	0	0	0	0	0	0	0	0	0	0											0	0	0	0	0	0	0	0	0	1	0	0											0	0
466	M	9	F10d
467	M	7	F5d	1	1	1	1	1	0	0	0	0														1	0	1	1	1	0	0	0	0														1	1
468	F	7	F5d		1																						1																						1
469	F	9	F10d		0	0	0	0	0	0	0	0	0	0	0	0	0										1	1	1	1	1	1	1	0	0	0	0	1	0										0
470	M	9	F10d	0	1	0	0	0	0	0	0	0	0	0												0	0	0	0	0	0	0	0	0	0	0												0	0
471	M	6	F5d	0	1	0	0	0	0	0	0															0	0	0	1	1	0	1	1															0	0
472	F	5	F5d	0	0	0	0	0	0	0	0															0	0	0	0	0	0	0	0															0	0
473	F	9	F10d
474	M	6	F5d		0	0		0	0	0	0	0	0														0	0		0	0	0	0	0	0														0
475	M	6	F5d		1	0	0	0	0	0	1	0															0	0	1	0	0	0	1	0															0
476	F	5	F5d	0	0	0	0	0	0	0	0															0	0	0	1	1	1	1	0															0	0
477	M	6	F5d	0	0	0	0	0	0	0	0	0														0	0	1	1	1	1	1	1	1														0	0
478	F	5	F5d	1	1	1	1	0	0	0	0															0	0	0	0	0	0	1	1															0	0
479	F	5	F5d	1	0	0	0	0	0		0															0	0	0	0	0	0		0															0	0
480	M	9	F10d	0	0	0	0	0	0	0	0	0	0	0	0	0	0									0	0	0	0	0	0	0	0	0	0	0	0	0	0									0	0
481	M	6	F5d		0	0	1	1	0	0	0	1	0														0	1	1	1	0	1	0	1	1														1
482	M	9	F10d	0	0	0	0	0	0	0	0	0	0	0												0	0	0	0	0	0	0	0	0	0	0												0	0
483	M	5	F5d	0	0	0	0	0	0	0																0	0	0	0	1	0	0																0	0
484	F	6	F5d	1	1	1	0	0	0	0	0															0	0	0	0	0	1	0	1															0	0
485	M	6	F5d		1	1	1	1																			0	0	0	0																			0
486	M	6	F5d	0	0	1	0	0	0	0	0	0	0													0	0	0	0	0	0	0	0	0	0													0	0
487	F	8	F10d
488	F	5	F5d	0	0	0	0	0	0	0																0	0	0	0	0	0	1																0	0
489	F	8	F10d	0	1	0	0	0	0	0	0	0	0	0												0	0	0	1	1	0	0	0	0	1	0												1	0
490	F	5	F5d	1	1	1	0	0	0	0																0	1	1	1	1	0	1																0	0
491	F	5	F5d	0	1	0	0	0	0	0	0															0	0	1	0	0	0	0	0															0	0
492	F	8	F10d	0	0	0	0	0	0	0	0	0	0	0												0	0	0	0	0	0	0	1	1	1	0												0	0
493	F	8	F10d	1	1	1	0	0	0	0	1															0	0	1	0	0	0	0	0															0	0
494	F	5	F5d	1	1	0	0	0	0	0	0															0	0	0	0	0	0	0	0															0	0
495	F	8	F10d	0	0	0	0	0	0	0	0	0	0	0												0	0	0	0	0	0	0	0	0	0	1												1	0
496	F	5	F5d		0	0	0	0	0	0																	0	0	0	0	0	0																	0
497	F	8	F10d	0	1	1	1	0	0	0	0	0	0													0	1	1	1	1	1	1	0	0	1													0	0
498	F	5	F5d
499	F	8	F10d	1	0	1	1	0	0	0	0	0	0	0	0											0	0	1	1	1	1	1	1	1	1	1	1											1	1
500	F	8	F10d	1	1	1	0	0	0	0	0	0	0													0	0	1	1	1	0	0	0	0	0													0	0
501	M	5	F5d	0	0	0	0	0	0	0	0															0	0	0	1	0	0	0	0															0	0
502	M	5	F5d
503	M	5	F5d	1	1	0	0	0	0	0																0	1	1	1	1	1	0																0	0
504	F	14	F15d	0	0	0	0	0	0	0	0		0	0	0	0	0	0	0	0						0	0	0	0	0	0	0	0		0	0	0	0	0	0	0	0						0	0
505	F	8	F10d	0	0	0	0	0	0	0	0	0	1	0												0	0	0	0	0	0	1	0	0	0	0												0	0
506	F	8	F10d	0	0	0	0	0	0	0	0	0	0													0	0	0	0	0	0	0	0	0	0													0	0
507	M	14	F15d	0	0	0	0	0	0	0	0	0	0	0	0	0	0	0	0	0						0	0	0	0	0	0	0	0	0	0	0	0	0	0	0	0	0						0	0
508	F	6	F5d	1	1	0	0	0	0	0	0															0	0	0	1	0	0	0	0															0	0
509	M	5	F5d
510	F	15	F15d	0	0	0	0	0	0	0	0	0	0	0	0	0	0	0	0	0	0	0	0	0		0	1	0	1	0	0	0	1	0	1	0	1	0	1	1	1	0	0	1	1	1		0	0
511	M	5	F5d
512	M	5	F5d	1	1		0	0	0																	0	0		0	0	0																	0	0
513	M	5	F5d
514	F	9	F10d	0	0	0	0	0	0	0	0	0	0	0	0											0	0	0	0	0	0	0	0	0	0	0	0											0	0
515	F	9	F10d	0	0	0	0	0	0	0	0	0	0	0												0	0	0	1	0	1	0	0	0	1	0												0	1
516	F	5	F5d	1	1	0	0	0	0	0																0	0	0	0	0	0	0																0	1
517	F	6	F5d	0	1	1	1	1	0	0	0															1	1	1	1	0	1	1	1															0	0
518	M	8	F10d	0	1	0	0	0	0	1	1	0	0	0												0	0	0	0	0	0	1	0	0	0	0												0	0
519	M	5	F5d	0	0	0	0	0	0	0	0	0														0	0	0	1	1	1	0	0	0														0	0
520	F	5	F5d	0	0	0	0	0	0	0																0	1	0	1	1	1	1																0	0
521	F	9	F10d	0	0	0	0	0	0	0	0	0	0	0	0											1	0	0	0	0	1	1	0	0	0	1	1											0	0
522	F	8	F10d	1	0	1	1	0	0	0		0	0													0	1	1	1	1	1	1		1	1													0	0
523	M	8	F10d		0	0	0			0																	0	0	0			0																	0
524	F	5	F5d	1	0	1	0	0	0	0																0	0	0	1	0	0	0																0	0
525	F	6	F5d
526	M	9	F10d	0	0	0	0	0	1	0	0	0	0	0	0											1	1	1	0	1	1	0	0	0	0	0	0											1	1
527	M	14	F15d
528	M	5	F5d
529	M	21	F20d		0	0	0	0	0	0	0	0	0	0	0	0	0	0	0	0	0	0	0	0	0		0	1	0	1	0	0	0	0	0	0	0	1	1	0	0	1	0	0	0	1	1		0
530	F	5	F5d
531	M	8	F10d	0	0	0	0	0	0	0	0	0	0	0												0	0	0	0	0	0	1	1	1	0	0												0	0
532	M	6	F5d	0	0	0	0	0	0	0	0	0	0													0	1	1	1	1	1	1	0	0	0													1	1
533	F	14	F15d	1	1	1	0	1	0	0	0	0	0	0	0	0	0	0	0	0						1	0	0	0	0	0	0	0	0	0	0	0	0	0	0	0	0						0	0
534	M	6	F5d		0	0	0	0	0	0	0																1	0	0	0	1	0	0																0
535	M	9	F10d							0	0	0	0	0	0	0	0															1	0	0	0	0	0	0	0
536	F	5	F5d
537	M	14	F15d	0	1	1	0	0		0	0	0	0	0	0	0	0	0	0							0	0	0	0	0		0	0	0	0	0	0	0	0	0	0							0	0
538	M	14	F15d
539	M	8	F10d			0	0	0	0	0	0	0	0	0														0	0	0	0	0	0	0	0	0
540	M	6	F5d	1	1	1	1	0	0	0	0															0	0	0	0	0	0	0	0															1	0
541	F	5	F5d		0	0	0	0	0	0	0	0															0	1	1	1	0	0	0	0															0
542	F	5	F5d	0	0	1	0	0	0	0	0	0														0	0	0	0	0	0	0	0	0														0	0
543	F	8	F10d		0	0	0	0	0	0	0	0	0	0	0	0											0	0	0	0	0	0	0	0	0	0	0	1											1
544	M	6	F5d
545	F	6	F5d	1	0	0	0	0	0	0	1															0	1	0	0	0	0	0	0															0	0
546	M	9	F10d	1	1	1	0	0	1	0	0	0	0	0	0											1	1	0	0	0	0	0	0	0	0	0	0											0	0
547	F	8	F10d
548	F	5	F5d	0	0	0	0	0	0	0																0	1	1	1	1	1	0																0	0
549	M	5	F5d
550	F	5	F5d	0	0	0	0	0	0	0	0	0	0													0	1	0	0	0	0	0	0	0	0													0	0
551	F	5	F5d	1	1	0	0	0	0	0																0	0	1	1	0	0	0																0	0
552	M	5	F5d	0	0	0	0	0	0	0																0	1	1	1	0	0	0																0	1
553	F	14	F15d	0	0	0	0	0	0	0	0															0	0	1	0	1	0	0	0															0	0
554	M	14	F15d	0	1	0	0	0	0	1	0	0	0		0	0	0	0								0	0	0	0	0	0	0	1	0	1		0	0	0	0								0	0
555	M	8	F10d	0	1	0	0	0	0	0	0	0	0	0												0	0	0	0	0	0	0	0	0	0	0												0	0
556	M	16	F15d		0	0	0	0	1	0	1	1	0	0	0	0	0	0	0	0	0	0	0	0			0	1	1	1	0	1	1	0	1	1	1	1	0	1	1	0	0	0	0	0			0
557	F	19	F20d
558	M	5	F5d	0	0	0	1	0	0	0	0	0	0													0	0	0	1	1	0	0	0	0	0													0	0
559	F	5	F5d	1	0	0	0	0	0	0	0															0	0	0	1	1	0	1	1															1	0
560	M	8	F10d		0	0	0	0	0		0	0	0	0													0	0	0	0	0		0	0	0	0													0
561	M	5	F5d	0	1	0	0	0	0	0	0															0	0	0	0	0	0	0	0															0	0
562	M	7	F5d
563	F	5	F5d	0	0	0	0	0	0	0	0	0	0	0												1	0	0	0	0	0	0	0	0	0	0												0	0
564	F	8	F10d	0	0	0	0	0																		0	0	0	1	0																		0	0
565	F	8	F10d		1	1	0	0	0	0	0	0	0	0	0	0											1	1	1	0	1	1	0	0	1	1	1	0											1
566	M	6	F5d
567	F	9	F10d	0	0	0	0	0	0	0	0	0	0	0	0	0										0	0	0	0	0	0	0	0	0	0	0	0	0										0	0
568	F	5	F5d
569	F	5	F5d
570	M	5	F5d
571	M	5	F5d	0	0	0	0	0	0	0	0															0	0	0	0	0	0	0	0															0	0
572	F	5	F5d	1	1	0	0	0	0	0	0															0	0	0	0	0	0	0	0															0	0
573	M	8	F10d
574	F	5	F5d	1	1	0	0	0	0	0	0															0	0	1	0	0	0	0	0															0	0
575	M	8	F10d	0	0	0	0	0	0	0		0	0													0	0	0	0	0	0	0		0	0													0	0
576	F	8	F10d	0	1	0	0	0	0	0	0	0	0													0	0	0	0	0	0	0	0	0	0													0	0
577	F	8	F10d
578	F	8	F10d
579	M	8	F10d	0	0	0	0	0		0	0	0	0													0	0	1	1	1		0	0	0	0													0	0
580	F	8	F10d		1	1	0	1	1	0	0	0	0	0	0												0	0	0	0	0	0	0	0	1	1	0												1
581	M	9	F10d	0		0	0	0	0	0	0	0	0	0	0	0	0									0		0	0	0	0	0	0	0	0	0	0	0	0									0
582	M	5	F5d	1	0	0	0	0	0	1																0	0	0	0	0	0	0																1	0
583	M	6	F5d
584	F	5	F5d	0	1	1	1	0	0	0																0	1	1	1	0	1	0																0	0
585	M	14	F15d	0	0	1	1	0	0	0	0	0	0	0	0	0	0	0	0							0	0	0	1	1	0	1	1	1	0	0	1	1	1	0	0							0	0
586	M	11	F10d
587	F	14	F15d	1	0	0	0	0	0	0	0	0	0	0	0	0	0	0	0							0	0	0	0	0	0	0	0	0	0	0	0	0	0	0	0							0	1
588	M	11	F10d	0	0	0	1	0	0	0	0	0	0	0	0	0										0	1	1	1	1	0	1	0	0	0	0	0	0										0	0
589	F	8	F10d
590	M	20	F20d		1	0	0	0	0	0	0	0	0	0	0	0	0	0	0	0	0	0	0	0	0		0	0	0	0	0	0	0	0	0	0	0	0	0	0	0	0	0	0	0	0	0		0
591	M	5	F5d	0	1	1	1	0	0	0																0	0	0	0	0	0	0																0	0
592	M	9	F10d	0	0	0	0	0	0	0	0	0	0	0	0	0										0	0	0	0	1	1	0	1	0	0	1	0	1										0	0
593	F	8	F10d	1	1	1	0		0	0	0	0	0													0	1	1	1		1	0	1	1	1													0	1
594	M	7	F5d
595	M	6	F5d
596	F	14	F15d	1	1	0	0	0	0	0	0	0	0	0	0	0	0	0		0	0					0	0	0	0	0	0	0	0	0	0	0	0	0	0	0		0	0					0	0
597	M	14	F15d	0	0	0	0	0	0	0	0	0	0	0	0	0	0	0	0	0	0	0	0	0		0	0	0	0	0	0	0	0	0	0	0	0	0	0	0	0	0	0	0	0	0		0	0
598	M	10	F10d	0	0	0	0	0	0			0	0													0	0	0	0	0	0			0	0													0	0
599	F	5	F5d
600	M	9	F10d	0	0	0	0	0	0	0	1	0	1	0												0	0	0	0	0	0	0	0	0	0	0												0	1
601	M	8	F10d	0	0	0	0	0	0	0	0	0	0													0	0	0	0	0	0	0	0	0	0													0	0
602	F	8	F10d
603	F	6	F5d	1	1	1	1	1	1	0	1	1	1													0	0	0	0	0	0	1	1	0	0													0	1
604	F	6	F5d
605	F	5	F5d
606	F	14	F15d	1	1	1	1	1	1	1	1	1	1	1	1	1	1	1	1	1	1					1	1	1	1	1	1	1	1	1	1	1	1	1	1	1	1	1	1					0	0
607	F	20	F20d	0	0	0	0	0	0	0	0	0	0	0	0	0	0	0	0	0	0	0	0	0	0	0	0	0	0	0	0	0	0	0	0	0	0	0	0	0	0	0	0	0	0	0	0	0	0
608	M	5	F5d	0	0	0	0		0	0	0	0														0	0	0	0		0	0	0	0														0	1
609	M	8	F10d	0	0	0		0	0		0	0	0													0	0	0		0	0		0	0	0													0	0
610	M	5	F5d	0	0	0	0		0	0	0	0														0	0	0	0		0	0	0	0														0	0
611	F	9	F10d
612	F	5	F5d	0	0	0	0	0	0	0																1	1	1	1	1	1	1																0	0
613	M	5	F5d	0	0	0	0	0	0	0																0	0	0	0	0	0	0																0	0
614	M	21	F20d	0	0	0	0	0	0	0	0	0	0	0	0	0	0	0	0	0	0	0	0	0	0	0	0	0	0	0	0	0	0	0	0	0	0	0	0	0	0	0	0	0	0	0	0	0	0
615	F	21	F20d	1	0	1	0	0	0	0	0	0	0	0	0	0	0	0	0	0	0	0	1		0	1	1	0	0	1	1	1	1	0	0	0	0	0	1	0	1	0	0	0	0		0	1	0
616	M	8	F10d
617	F	8	F10d	0	0	0	0	0	0	0	0	0	0	0												0	0	1	1	0	0	1	0	0	0	0												0	0
618	F	8	F10d	0	0	1	1	1	0	0	0															0	0	0	0	0	0	0	1															0	0
619	M	20	F20d	0	0	0	0	1	1	0	0	0	1	0	0	0	0	0	0	0	0	0	0	0	0	0	1	1	0	1	1	1	1	0	0	0	0	0	1	1	1	0	0	1	1	1	1	0	0
620	M	5	F5d	0	0	0	0	0	0	0	0															0	0	0	0	1	0	0	1															0	0
621	M	14	F15d
622	M	8	F10d
623	M	14	F15d	0	0	0	0		0																	0	0	0	0		1																	0	0
624	F	8	F10d	1	1	0		0	0				0													1	1	0		0	0				0													0	0
625	F	10	F10d
626	F	14	F15d
627	M	5	F5d		0																						0																						0
628	F	14	F15d	0	1	1	0	0	0	0	0	0	0	0	0	0	0	0	0	0						1	0	0	0	0	0	1	0	0	0	0	0	0	0	0	0	0						1	0
629	M	5	F5d	0	0	0		0	0	0																0	0	0		0	0	0																0	0
630	M	5	F5d	0	1	0	0	0	1	1																0	0	0	0	0	0	0																0	0
631	M	8	F10d	0	1	0	1	1	0	0	0	0	0	0												1	0	0	0	0	0	0	0	0	0	0												0	0
632	F	5	F5d
633	F	6	F5d	0	0	0	0	0	0	0	0	0	0													0	0	0	0	0	0	0	0	0	0													0	0
634	F	5	F5d	0	0	0	0	0	0																	0	0	0	0	0	0																	0	0
635	F	21	F20d	0	0	0	0	1	0	0	0	0	0	0	0	0	0	0	0	0		0	0	0	0	0	0	0	0	0	1	0	0	0	0	0	0	0	0	0	0	0		0	0	0	0	0	0
636	M	6	F5d	1	1	1	1	0	0	0	1															0	1	1	1	0	0	0	0															0	0
637	F	21	F20d	0	0	0	0	0	0	0	0	0	0	0	0	0	0	0	0	0	0	0	0	0	0	0	0	0	0	0	0	0	0	0	0	0	0	0	0	0	0	0	0	0	0	0	0	0	0
638	M	8	F10d	0	0	0	0	0	0	0	0	0	0													0	0	0	0	0	0	0	0	0	0													0	0
639	M	6	F5d	0	0	0	0	0	0	0	0	0	0													0	0	1	1	1	1	0	0	0	0													0	0
640	M	8	F10d	0	0	0			0	0		0														0	0	1			0	0		1														0	0
641	F	5	F5d	0	0	0	0	0	0	0	0															0	0	0	0	0	0	0	0															0	0
642	F	5	F5d	0	0	0	0	0	0	0																1	1	1	1	0	1	1																1	0
643	M	5	F5d	0		0	0																			0		0	0																			0
644	M	8	F10d	0	0	0	0	0	0	0	0	0	0	0												0	1	0	0	0	0	0	0	0	0	0												0	0
645	F	6	F5d
646	M	6	F5d
647	M	5	F5d		1	0																					0	0																					0
648	F	8	F10d	1	0	0	0	0	0	0	0	0	0	0	0											0	0	0	0	0	0	0	0	0	0	0	0											0	0
649	M	14	F15d	0	0	0	0	0	0	0	0	0	0	0	0	0	0	0	0	0	0					0	0	0	0	0	0	0	0	0	0	0	0	0	0	0	0	0	0					0	0
650	F	14	F15d	1	0	0	0	0	0	0	0	0	0	0	0	0	0	0	0	0						0	0	0	0	0	0	0	0	0	0	0	0	0	0	0	0	0						0	0
651	F	5	F5d	0	0	0	0	0	0	0	0	0														0	0	0	0	0	0	0	0	0														0	0
652	M	5	F5d
653	F	18	F20d	1	1	0	0	0	0	0	0	0	0	0	0	0	0	0	0	0	0	0	0	0	0	0	1	0	0	0	0	0	0	0	0	0	0	0	0	0	0	0	0	0	0	0	0	0	0
654	M	6	F5d	0	0																					0	0																					0	0
655	M	8	F10d	1	1	0	0	0	1	0	0	0	0	0												0	0	0	0	0	0	0	0	1	0	0												0	0
656	F	5	F5d	0	0	0	0	0	0	0	0															0	0	0	0	1	1	1	1															0	0
657	F	10	F10d	0	0	0	0	0	0	0	0	0	0	0	0	0	0									0	0	1	1	1	0	0	0	0	1	1	0	0	0									0	0
658	F	8	F10d	0	0	0	0	0	0	0	0	0	0													0	0	0	0	0	0	0	0	0	0													0	0
659	M	5	F5d	0	0	0	0	0	0	0	0	0														0	0	0	0	0	0	0	0	0														0	0
660	F	5	F5d	1	0	0	0	0	0	0	0	0														0	0	0	0	0	0	0	0	0														0	0
661	F	8	F10d	1	0	0	0	0	0	1	0	0	0	0	0	0										0	1	0	1	1	1	1	0	0	1	1	1	1										0	0
662	F	14	F15d
663	M	5	F5d	1	1			0	0																	0	0			0	0																	0	0
664	F	5	F5d	1	1	1	0	0	1	1	1															1	1	1	1	1	1	0	1															0	0
665	F	8	F10d	0	0	0	0	0	0	0	0		0		0											0	0	0	1	1	0	0	0		0		0											1	0
666	M	5	F5d		1																						0																						0
667	M	5	F5d	1	0	1	0																			0	0	0	0																			0	0
668	F	14	F15d		0					0	0	0	0	0	0	0	0	0		0	0						0					1	1	0	0	0	0	0	0	0		0	0						1
669	F	15	F15d	0	0	0	0	0	0	0	0	0	0	0	0	0	0	0	0	0	0	0	0	0	0	1	0	0	0	0	0	1	1	1	1	1	1	1	0	0	0	0	0	0	0	0	0	0	0
670	F	7	F5d	0	0	0	0		0	0	0	0	0	0	0											0	0	0	0		0	0	0	0	0	0	0											0	0
671	M	15	F15d	1	1	0	0	0	0	0	0	0	0	0	0	0	0	0	0	0	0	0	0			0	0	0	0	0	0	0	0	0	0	0	0	0	0	0	0	0	0	0	0			0	0
672	F	6	F5d	1	1	1	0	0	0	0	0	0	0	0												0	0	0	0	0	0	0	0	0	0	0												0	0
673	M	8	F10d	1	1	0	0	0	0	0	0	0	0	0	0	0										0	0	0	0	1	0	0	0	0	0	0	0	0										0	0
674	F	14	F15d	0	0	0	0	0	0	0	0	0	0	0	0	0	0	0	0	0						0	0	0	0	0	0	0	0	0	0	0	0	0	0	0	0	0						0	0
675	M	6	F5d					0	1	1																				0	0	0
676	M	15	F15d	0	0	0	0	0	0	0	0	0	0	0	0	0	0	0	0	0						0	0	0	0	1	1	1	0	0	0	0	0	0	0	0	0	0						0	0
677	F	6	F5d	0	0		0	0	0	0	0	0	0													0	0		0	1	0	0	0	0	0													0	0
678	F	5	F5d	0	0	0	0	0	0	0																0	0	0	0	0	0	0																1	0
679	M	5	F5d		0	0	0	0	0	0	0	0															0	0	0	0	0	0	0	0															0
680	F	8	F10d
681	F	8	F10d
682	F	5	F5d
683	M	8	F10d
684	M	8	F10d
685	F	8	F10d	0	0	0	0	0	1	0	0	0	0	0												0	0	0	0	0	0	0	0	0	0	0												0	0
686	M	8	F10d
687	M	5	F5d
688	M	6	F5d	0	0	1	0	0	0	0	0															0	0	0	0	0	0	0	0															0	0
689	F	5	F5d	0	0	1		0	0	1	0															0	0	0		0	1	1	0															1	1
690	F	15	F15d	1	1	1	0	0		0	0	0	0	0	0		0	1	0	0						0	0	0	1	0		0	0	0	0	0	0		0	0	0	0						0	0
691	F	13	F15d
692	F	7	F5d	1	1	1	0	0	0	0	0	0														0	0	0	0	0	0	0	0	0														0	0
693	M	7	F5d	1	0	0	0	0	0	0	0	0														1	0	1	1	1	0	1	0	1														0	0
694	F	7	F5d	0	0	0	0		0																	0	0	0	0		0																	0	0
695	F	9	F10d	0	0	0	0	1	1	0	0	0	0	0	0		0									0	0	0	0	1	0	0	0	0	0	0	0		0									0	0
696	M	9	F10d	0	0	0	0	0	0	0	0	0	0	0	0	0	0									0	0	0	0	0	0	0	0	0	0	0	0	0	0									0	0
697	F	5	F5d
698	F	10	F10d	1	0	0	0	0	0	0	0		0													0	0	1	1	0	1	0	0		0													0	0
699	F	8	F10d	0	0	0	0	0	0	0	0	0	0	0												0	0	0	1	1	1	1	1	0	0	0												0	0
700	F	8	F10d
701	F	4	F5d	1	1	1	0	0	0	0	0															0	0	0	1	0	0	1	0															0	0
702	F	5	F5d
703	M	8	F10d	0	0	0	0	0	0	0	0	0	0	0	0	0	0									0	0	0	0	0	0	0	0	0	0	0	0	0	0									0	0
704	M	6	F5d	1	1	1					1															0	0	0					0															0	0
705	M	5	F5d
706	M	8	F10d
707	F	9	F10d	0	1	0	0	0	0	0	0	0	0	0	0											0	0	0	0	0	0	0	0	0	0	0	0											0	0
708	F	8	F10d		0	0	1	0	0	0	0	0	0														0	0	0	0	0	0	0	0	0														0
709	M	8	F10d	0	0	0		0	0	0	0	0	0													0	0	0		0	0	0	0	0	0													0	0
710	F	5	F5d	0	0	0	0	0	0	0	0															0	0	0	0	0	0	0	0															0	0
711	F	9	F10d		1	1	1	1	1			1	0	0													1	1	1	0	1			0	0	0													0
712	F	5	F5d	0	0	0	0	0	0	0																0	0	0	0	0	0	0																0	0
713	M	5	F5d	0	1	1	0	0	0	0																0	0	0	0	0	0	0																0	0
714	F	8	F10d	0	0	0	0	0	0	0	0	0	0													0	0	0	0	0	0	0	0	0	1													0	1
715	F	4	F5d
716	F	14	F15d	0	0	0	0	0	0	0	0	0	0	0	0		0	0	0	0						0	0	1	1	0	0	0	0	0	0	0	0		0	0	1	0						0	0
717	F	14	F15d	1	0	1	0	0	0	0	0	0	0	0	0	0	0	0	0							0	0	1	0	1	0	0	0	0	0	0	0	0	0	0	1							0	0
718	M	13	F15d
719	F	8	F10d	1	1	0	1																			0	0	0	0																			0	0
720	M	14	F15d	0	0	0	0			0	0	0	0	0	0	0	0	0	0							0	0	1	0			1	1	1	1	1	1	1	1	1	0							0	0
721	F	15	F15d	0	1	0	0	0	0	0	0	0	0	0	0	0	0	0	0	0						0	0	0	1	0	0	0	0	0	0	0	0	0	0	0	0	0						0	0
722	F	14	F15d	1	1	1	1	0	1	0	0	0	0	0	0	0	0	0	0							1	0	1	1	1	1	0	1	0	0	0	1	0	0	0	0							0	0
723	M	9	F10d	0	0	0	0	0	0	0	0	0	0	0	0	0	0	0								0	0	0	0	0	0	0	0	0	0	0	0	0	0	0								0	0
724	F	5	F5d		0	1	1	0	0	0	0																1	1	1	1	1	1	1																0
725	F	10	F10d	0	0	0	0	0	0	0	0	0	0	0	0											0	1	0	0	1	0	0	1	0	0	1	1											0	0
726	F	8	F10d	0	1	0				0	0															0	0	0				0	0															0	0
727	M	9	F10d	0	0	0	0	0	0	0	0	0	0	0	0											1	1	0	1	0	0	0	1	0	1	0	1											0	0
728	M	6	F5d	0	1	0	0	0	0	0	0															0	0	0	0	0	0	0	0															0	1
729	M	6	F5d	1	0	1	1	0	0	0																0	0	1	0	1	1	0																0	0
730	M	5	F5d
731	F	6	F5d	1	0	1	0	0	0	1	0	0		0	0											1	1	1	1	1	1	1	0	0		0	0											1	0
732	F	5	F5d		0	0	0	0	0	0																	0	0	0	0	0	0																	0
733	F	5	F5d	0	0	0	1	0	0	0																0	0	0	0	0	0	1																0	0
734	M	8	F10d	1	0	1	1	1	0	0	0	0	0													1	0	1	1	1	1	1	1	1	1													1	1
735	F	5	F5d	0	1	0		0	0	0																0	0	0		0	0	0																0	0
736	F	5	F5d	1	0	0	0	0	0	0																0	0	0	0	0	0	0																0	1
737	F	5	F5d	0	1	1	0	0	0	0	0															0	0	1	0	0	0	0	0															0	0
738	F	6	F5d	0	0	0	0	0	0	0	0	0	0													0	0	0	0	0	0	0	0	0	0													0	0
739	M	4	F5d		0	0	0	0	0	0																	0	1	0	0	0	0																	1
740	M	9	F10d	1	1	1	1	1	1	0	0	0	0	0												0	0	0	0	0	0	0	0	0	0	0												0	0
741	M	8	F10d	0	0	0	0	0	0	0	0	0	0	0	0	0										0	0	0	0	0	0	0	0	0	0	0	0	0										0	0
742	F	5	F5d
743	F	8	F10d
744	M	5	F5d	1	0	0	0	0	0	0	0															0	0	0	0	0	0	0	0															0	0
745	F	8	F10d	0	0	0		0	0	0	0	0														0	0	0		1	1	0	0	0														0	0
746	F	5	F5d	0	0	0	0	0	0	0																0	0	1	0	0	1	0																0	0
747	F	14	F15d	0	1	0	0	0	0	0	0	0	0	0	0	0	0	0	0							0	0	1	1	1	1	1	1	1	0	0	0	0	0	0	0							0	0
748	F	14	F15d	0	1	0	0	0	0	0	0	0	0	0	0	0	0		0							1	0	0	0	0	0	0	0	0	0	0	0	0	0		1							0	0
749	F	5	F5d	1	1	1	1	1	1	0																0	0	0	0	0	0	0																0	0
750	M	5	F5d	0	0	0	0	0	0	0																0	0	0	0	0	0	0																0	0
751	F	5	F5d	1	1	0	0	0	0	0																0	0	0	0	0	0	0																0	0
752	F	5	F5d	0			0																			0			0																			0
753	F	5	F5d		0	0	1	1	0	0	0																0	0	1	1	0	0	1																0
754	M	10	F10d
755	M	6	F5d		0	0	0	0	0	0	0	0	0	0	0												0	0	0	0	0	0	0	0	0	0	0												0
756	M	14	F15d		0	0			0	0	0	0	0			0					0						0	0			0	0	0	0	0			0					0						0
757	M	5	F5d
758	M	10	F10d	0	0	0	0	0	0	0	0	0	0	0	0											1	1	1	0	1	0	0	0	0	0	1	1											0	0
759	F	14	F15d	1	1	0	0	0	0	0	0	0	0	0	1	0	0	0	0	0						0	0	0	0	0	0	0	0	0	0	0	0	0	0	0	0	0						0	0
760	M	8	F10d
761	M	5	F5d	1	1	1	0	1	0	1	0															1	1	0	0	0	0	1	0															1	0
762	F	8	F10d
763	F	8	F10d	0	0	0	0	0	0	0	0	0	0													1	1	1	1	1	1	1	1	1	1													0	0
764	M	9	F10d		0		0	0				0	0														0		0	0				0	0														0
765	F	5	F5d	0	1	1	1	0	1	1	0															0	0	0	0	0	0	0	1															0	0
766	F	8	F10d	1	1	1	1	1	1	1	1	1	1	1												0	0	0	0	0	1	1	1	1	1	1												1	1
767	M	8	F10d	0	0	0	0	1	1	0	0	0		1												0	0	0	0	0	0	0	0	0		0												0	0
768	F	8	F10d
769	M	5	F5d
770	M	6	F5d	0	0	0	1	0	0	0	0															0	0	0	0	0	0	0	0															0	0
771	F	5	F5d	1	1	1	0	0	0	0																1	0	1	1	1	1	1																1	1
772	M	5	F5d	0	0	0	0	0	0	0																0	0	0	0	0	0	0																0	0
773	F	8	F10d		0	0	0	0	0		0	0															0	0	0	0	0		0	0															0
774	M	5	F5d	1	1	0	0	0	1	1																0	0	0	0	1	0	0																0	0
775	M	9	F10d	0	0	0	0	0	0	0	0	0	0	0	0											1	0	0	0	0	0	1	1	1	1	1	1											0	0
776	M	8	F10d	0	0	1	0	0	0	0	0	0	0	0												0	0	0	0	1	0	0	0	0	0	0												0	0
777	F	8	F10d	0	1	0	0	0	0	0	0	0	0	0												0	0	0	0	1	1	1	0	1	1	1												0	0
778	M	8	F10d		0	0	0	0	0	0	0	0	0														0	0	0	0	0	0	0	0	0														0
779	F	6	F5d	0	1	0	0	0	0	0	0															0	0	0	0	0	0	0	0															0	0
780	F	9	F10d	1	0	0	0	0	0	1	0	0	0	0	0											0	0	0	0	0	0	0	0	0	0	0	0											1	0
781	F	14	F15d	0	0	0	0	0	0	0	0	0	0	0	0	0	0	0	0	0						0	0	0	0	0	0	0	0	0	0	0	0	0	0	0	0	0						0	0
782	F	8	F10d
783	F	8	F10d	1	1	0	0	0	0	0	0	0		0												0	0	0	1	0	0	0	0	0		0												0	0
784	M	5	F5d	0	0	0	0	0	0	0																0	0	0	0	0	0	0																0	0
785	F	5	F5d
786	F	8	F10d	0	1	1	0	0	0	0	0	0	0	0												1	0	0	1	0	0	0	1	0	0	0												0	1
787	M	8	F10d	0	0	0	0	0	0	0	0	0	0													0	0	0	0	0	0	0	0	0	0													1	1
788	F	5	F5d	0	0	0	0	0	0	0																0	0	0	0	0	0	0																0	0
789	F	5	F5d
790	M	14	F15d	1	1	0	0	0	0	0	0	0	0	0	0	0	0	0	0	0						0	0	0	0	0	0	0	0	0	0	0	0	0	0	0	0	0						0	0
791	F	5	F5d	0	0	0	0	0	0	0																0	0	0	0	0	0	0																0	0
792	F	14	F15d	0	0	0	0	0	0	0	0	0	0	0	0	0	0	0	0							0	0	0	0	0	0	0	0	0	0	0	0	0	0	0	0							1	0
793	F	5	F5d	1	1	1	1	0	1	1																1	1	1	0	0	0	0																1	1
794	F	5	F5d	1	0	0	0	0	0	0																0	1	0	0	0	0	0																0	1
795	F	5	F5d	0	1	0			0	0																1	1	1			1	1																1	1
796	M	5	F5d	0	0	0	0	0	0	0																1	1	1	1	0	0	1																0	0
797	F	8	F10d	0	1	0	0	0	0	0	0	0	0	0	0	0										0	0	0	0	0	0	0	0	0	0	0	0	0										0	0
798	M	9	F10d	1	1	1	0	0	1	1	0	0	0	0	0											1	0	0	0	0	0	0	0	0	0	0	0											0	0
799	F	14	F15d	0	0	0	0	0	0	0	0	0	0	0	0	0	0	0	0	0	0					1	1	1	1	1	1	1	1	1	1	1	1	1	1	1	1	1	1					0	0
800	M	5	F5d	0				0																		0				0																		0
801	M	8	F10d	0	1	1	1	0	0	1	0	0	0	0												0	0	0	0	0	0	0	0	0	0	0												0	1
802	F	8	F10d	0	0	0	0	0	0	0	0	0	0	0												1	0	1	1	1	1	1	1	0	1	0												1	0
803	M	8	F10d	1	1	1	1	0	0	0	0	0	0													0	0	1	1	1	1	1	1	1	1													0	0
804	M	8	F10d	0	1	1	1	1	1	1	1	0	0	0												1	1	0	0	0	0	0	0	0	0	0												0	0
805	F	8	F10d
806	F	5	F5d
807	F	5	F5d
808	M	5	F5d	0	0	0	1	0	0	0																0	0	0	0	0	0	0																0	0
809	F	8	F10d	1	0	0	0	0	0	0	0	0	0													1	0	1	1	0	0	1	1	1	0													1	1
810	F	5	F5d	0	0	0	0	0	0	0	0															0	0	0	0	0	0	0	0															0	1
811	M	5	F5d	0	0	0	0	0	0																	0	0	0	0	0	0																	0	0
812	M	8	F10d		0	0	1	0	1	0	0	0	1	0													0	0	0	0	0	0	0	0	0	0													0
813	F	8	F10d	1	1	1	0	0	0	0	0	0	0	0												0	0	0	1	1	0	0	0	0	0	0												0	0
814	M	6	F5d	1	0		0	0	0	0	0															1	0		0	1	0	1	0															1	0
815	F	6	F5d	1	0	1	0	0	0	0	0															1	1	1	0	0	0	0	0															1	0
816	F	5	F5d	1	1	0	0	0	0	0	0															0	0	0	0	1	1	1	0															0	0
817	F	5	F5d	1	1	1	0	0	0	0	0															0	0	0	0	0	0	0	0															0	0
818	F	5	F5d		0	0	0	0	0	0	0	0	0														0	0	0	0	0	1	0	1	0														0
819	M	5	F5d	0	1	1	1	0	1	1	1	1														0	0	0	0	0	0	0	0	0														0	0
820	F	4	F5d	0	0	0	1	0	0	0	0															0	0	0	0	0	0	0	0															0	0
821	F	14	F15d
822	F	15	F15d
823	M	4	F5d	1	1	0	0	0	0	0	0															0	0	1	1	1	1	0	0															1	1
824	F	15	F15d
825	F	5	F5d	0	1	0	1	0	0	0																0	0	0	0	1	0	0																0	0
826	F	7	F5d	0	0	0	0	0	0	0	0	0														0	0	0	0	0	0	0	0	0														0	0
827	F	13	F15d	1	1	0	0	0	0	0	0	0	0	0												0	1	1	1	1	1	1	1	0	0	1												0	1
828	M	5	F5d	0	0	0	0	0	0	0																0	0	0	0	0	0	0																0	0
829	F	5	F5d
830	F	5	F5d
831	M	5	F5d	0	0		0	0	0	0																0	0		0	0	0	0																0	0
832	F	8	F10d
833	F	11	F10d	0	0	0	0	0	0	0	0	0	0	0	0	0	0									0	0	0	0	0	0	0	0	0	0	0	0	0	0									0	0
834	F	8	F10d	0	1	0	0	0	0	0	0	0	0													0	0	0	0	0	0	0	0	0	0													1	1
835	F	13	F15d	1	1	1	1	1	1	0	0	0	0	0	0	0	0	0	0							0	0	1	1	1	1	0	1	1	1	0	1	1	1	1	1							0	0
836	F	15	F15d	0	0	0	0	0		0	0	0	0	0	0	0	0	0	0	0						0	0	1	0	0		0	0	0	0	0	0	0	0	1	1	0						1	1
837	F	5	F5d
838	F	13	F15d	0	0	0	0	0	0		0	0	0	0	0	0	0		0							0	0	1	0	0	1		1	1	1	0	0	0	0		0							1	1
839	F	14	F15d
840	F	10	F10d	0	1	0	0	0	0	0	0	0	0	0	0											0	0	0	0	0	0	0	0	0	0	0	0											0	0
841	M	5	F5d		1	0	0	0	0	0	0	0															0	0	0	0	0	0	0	0															0
842	F	5	F5d
843	F	6	F5d		0	0	1	0	0	0	0	0	0														0	0	1	1	1	1	1	1	1														0
844	F	5	F5d	1	1	1	0	0	0	0	0															0	0	0	0	0	0	0	0															0	0
845	F	5	F5d	0	0	0	0	0	0	0	0															0	0	0	0	0	0	0	0															1	0
846	F	8	F10d	1	1	1	0	0	0	0			0													0	0	0	0	0	0	0			0													0	0
847	M	10	F10d
848	F	8	F10d	0	0	0	0	0	0	0	0	0	0													0	0	0	1	0	1	0	0	0	0													0	0
849	F	9	F10d	1	1	1	0	0	0	0	0	0	0	0	0	0										0	0	0	0	0	0	0	0	0	0	0	0	0										0	0
850	F	8	F10d
851	F	8	F10d	0	0	0	0	0	0	0	0	0	0	0												0	0	1	0	0	0	0	0	0	0	0												0	0
852	M	14	F15d		0	0	0	0	0	0	0	0	0		0	0	0	0	0	0	0	0	0				0	0	0	0	0	0	0	0	0		0	0	0	0	0	0	0	0	0				0
853	F	8	F10d	1	1	1	0	0	0	0	0	0	0	0	0											0	0	0	0	0	0	0	0	0	0	0	0											0	0
854	M	14	F15d	0	0	0	0	0	0	0	0	0	0						0	0	0					0	0	1	0	0	0	0	0	0	0						0	0	0					0	0
855	F	5	F5d	1	1	0	1	0	0	0																0	1	0	1	1	0	0																0	0
856	F	5	F5d	0	0	0	0	0	0	0																0	0	0	1	0	1	0																0	0
857	M	6	F5d	1	0	1	0	0	0	0	0															1	1	1	1	1	0	0	0															0	1
858	M	5	F5d	0	0	0	0	0	0	0																0	0	0	1	1	1	0																0	0
859	M	8	F10d
860	F	5	F5d	0	0	0	0	0	0	0																0	0	0	0	0	0	1																1	0
861	M	5	F5d	1	0	0	0	0																		1	1	1	1	0																		0	0
862	F	5	F5d		0	1	0	0	0	0	0	0															0	0	0	0	0	0	0	0															0
863	M	8	F10d
864	M	7	F5d		0	0	0	0	0	0	0	0															0	0	0	0	1	0	0	0															1
865	F	6	F5d			0	1	0	0	0	0	0	0															0	1	0	0	0	0	0	0
866	F	5	F5d	1	0	0	0	0	0	0																0	0	0	0	0	0	0																1	0
867	F	5	F5d		1				0	0																	1				0	0																	0
868	M	8	F10d	1	0	0	0	0	0	0	0	0	0													0	0	0	0	0	0	0	0	0	0													0	0
869	F	8	F10d	0	1	0	0	1	0	0	0	0	0	0	0	0	0									0	0	1	0	1	1	1	1	1	1	1	1	0	0									0	0
870	M	8	F10d
871	F	21	F20d	0	1	1	0	0	0	0	0	0	0	0	0	0	0	0	0	0	0	0	0	0	0	0	1	1	0	0	0	0	0	0	0	0	0	0	0	0	0	0	0	0	0	0	0	0	0
872	M	8	F10d	0	0	0	0	0	0	0	0	0	0	0												0	0	0	0	0	0	0	0	0	0	0												0	0
873	F	13	F15d	1	1	0	0	1	0	0	0	0	0	0	0	0	0	0	0							0	0	1	1	0	0	0	1	0	0	1	0	1	1	0	0							0	0
874	F	8	F10d	1	0	1	0	0	0	0	0	0	0													1	0	0	1	1	1	1	1	1	1													0	0
875	F	5	F5d	1	0	0	0	0	0	0	0															0	0	0	0	0	0	0	0															0	0
876	F	9	F10d	1	0	0	0	0	0	0	0	0	0	0	0											0	0	0	0	0	0	0	0	0	0	0	0											0	0
877	M	8	F10d	0	1	1	0	0	0	0	0	0	0	0												0	0	1	1	1	0	1	0	1	0	0												0	0
878	M	9	F10d
879	F	8	F10d	0	0	0	0	0	0	0	0	1	0	0												1	1	1	1	0	1	1	1	1	0	1												0	0
880	M	8	F10d	0	0	0	0	0	0		0	0	0													0	0	0	0	1	0		1	1	1													0	0
881	F	21	F20d	1	0	0	1	0	1	0	0	0	0	0	0	0	0	0	0	0	0	1	0	1	0	0	0	0	1	1	1	1	0	0	0	0	0	0	0	0	0	0	0	0	0	0	0	0	0
882	M	21	F20d	0	0	0	0	0	0	0	0	0	0	0	0	0	0		0	0	0	0	0	0	0	0	0	0	0	0	0	0	0	0	0	0	0	0	0		0	0	0	0	0	0	0	0	0
883	M	8	F10d	0	0	0	0	0	0	0	0	0	0	0												0	0	0	0	0	0	0	0	0	0	0												0	0
884	M	15	F15d	0	1	0	1	0	0	0	0	0	0	0	0	0	0	0	0	0	0	0	0			0	0	0	0	0	0	0	0	0	0	0	0	0	0	0	0	0	0	0	0			0	0
885	F	8	F10d
886	F	6	F5d	0	0	0	0	0	0	1	0		0													0	0	0	0	0	0	0	0		0													0	0
887	M	5	F5d	0	0	0	0	0	0	0																0	0	1	1	1	1	1																0	1
888	F	7	F5d
889	F	14	F15d	0	0	0	0	0	0	0	0	0	0	0	0	0	0	0	0	0						0	0	0	0	0	0	0	0	0	0	0	0	0	0	0	0	0						0	0
890	F	5	F5d	1	1	1	0	0	0	0																1	1	1	0	0	0	0																0	1
891	F	13	F15d	0	0	0	0	0	0	0	0	0	0	0	0	0	0	0								0	0	0	0	0	0	0	0	0	0	0	0	0	0	0								0	0
892	F	8	F10d		1	1	1	1	1	1	1	0	0	0	0	0											0	1	1	0	1	0	0	0	0	0	0	0											0
893	F	19	F20d	1	0	0	0	0	0	0	0	0	1	0	0	0	0	0	0	0	0	0	0	0	0	0	0	0	0	0	0	0	0	0	0	0	0	0	0	0	0	0	0	0	0	0	0	0	0
894	F	8	F10d		0	0	0		0	0	0	0	0	0	0	0											0	0	0		0	0	0	0	0	0	0	0											0
895	F	5	F5d	0	1	1	1	1	1	0	0	0														0	1	1	1	0	1	0	0	0														0	0
896	M	5	F5d	1	0	1	0	0	0	0	1	0														0	0	0	0	0	0	0	0	0														0	0
897	F	8	F10d	0	1	1	1	1	1	1	0	1	1													1	1	1	1	1	1	1	0	0	1													0	0
898	M	8	F10d	0	0	0	0	0	0	0	0	0	0													0	0	0	0	0	0	0	0	0	0													0	0
899	F	14	F15d	0	0	0	0	0	0	0	0	0	0	0	0	0	0	0	0	0						0	0	0	0	0	0	0	0	0	0	0	0	0	0	0	0	0						0	0
900	M	14	F15d	0	0	0	0	0	0	0	0	0	0	0	0	0	0	0	0	0						0	0	0	0	0	0	0	0	0	0	0	0	0	0	0	0	0						0	0
901	F	20	F20d
902	M	13	F15d	0	0	0	0	0	0	0	0	0	0		0	0	0	0	0							0	0	0	0	0	0	0	0	0	0		0	0	0	0	0							0	0
903	F	9	F10d	0	0	0	0	0	0	0	0	0	0	0												1	0	0	0	1	1	1	1	1	1	1												1	1
904	F	9	F10d	0	0	0	0	0			0															0	0	0	0	0			0															0	0
905	F	8	F10d
906	M	14	F15d	0	1	1	1	0	0	0	0	0	0	0	0		0	0	0	0						0	0	0	0	0	0	0	0	0	0	0	0		0	0	0	0						0	0
907	M	8	F10d		1	0	0	0																			0	0	0	0																			0
908	F	8	F10d	1	0	0	0	0	0	0	0	0	0	0	0											0	0	0	1	1	0	0	0	0	0	0	0											0	0
909	M	5	F5d
910	F	6	F5d	1	1	1	1	0	0	0	0	0														0	0	0	0	0	0	0	0	0														0	0
911	M	14	F15d	0	1	1	1	0	0	0	0	0	0	0	0	0	0	0	0							1	0	0	0	1	1	0	0	0	1	0	0	1	0	0	0							1	1
912	F	6	F5d	1	0	0	1	0	0	0	0															0	0	0	1	1	1	1	1															0	0
913	M	6	F5d	0	0	0	0	0	0	0	0	0														0	0	0	0	0	0	1	1	0														0	0
914	M	14	F15d	0	0	0	0	0	0	0	0		0	0	0		0	0	0	0	0					0	0	0	0	0	0	0	0		0	0	0		0	0	0	0	0					0	0
915	F	14	F15d	0	1	1	1	1	1	0	0	0	1	0	0	0	0	0	0	0						1	0	0	0	0	0	0	0	0	0	0	0	0	0	0	0	0						0	0
916	F	14	F15d	1	1	0	0	0	1	0	0	1	0	0	0	0	0	0	0	1	1					0	0	0	0	0	1	0	0	0	0	0	0	0	0	1	1	1	0					0	0
917	M	7	F5d	0	0	0	0		0	0	0	0														0	0	0	0		0	0	0	0														0	0
918	M	12	F10d	0	0	0	0	1	0	0	0	0	0	0	0	0										0	0	0	0	0	0	0	0	0	0	0	0	0										0	0
919	M	21	F20d
920	F	9	F10d	1	0	0	0	0	0	0	0															0	0	0	0	0	1	1	0															0	0
921	F	5	F5d	0	0	0	0	0	0	0	0															0	0	0	1	0	0	0	0															0	0
922	M	5	F5d	1	1	0	0	0	0	0																0	1	1	0	0	0	0																1	1
923	F	5	F5d	1	0	1	0	0	0	0																0	0	0	0	0	0	0																0	0
924	M	14	F15d	0	0	0		0			0						0									0	0	0		1			0						0									0	0
925	F	5	F5d	0	0	0	0	0	0	0	0	0														0	0	0	0	0	0	1	0	0														0	0
926	M	9	F10d
927	F	5	F5d	1	1	0	0	0	0	0	0	0														0	0	0	0	0	0	0	0	0														0	0
928	F	6	F5d		0	1	1	0	0	0	0	0	0														1	0	0	0	0	0	0	0	0														0
929	F	8	F10d	1	1	1	0	0	0	0	0	0	0	0												0	0	0	0	0	0	0	0	0	0	0												0	0
930	F	21	F20d	0	0	0	0	0	0	0	0	0	0	0	0	0	0	0	0	0	0	0	0	0	0	0	0	0	0	0	0	0	0	0	0	0	0	0	0	0	0	0	0	0	0	0	0	0	0
931	F	21	F20d		0	0	0	0	0	0	0	0	0	0	0	0	0	0	0	0	0	0	0	0	0		0	0	0	0	0	0	0	0	0	0	0	0	0	0	0	0	0	0	0	0	0		0
932	M	8	F10d	1	1	0	0	0	0	0	0	0		0												0	0	0	0	0	0	0	0	0		0												0	0
933	F	9	F10d	0	0	0	0	0	0	0	0	0	0	0												0	0	0	0	0	0	0	0	0	0	0												0	0
934	F	8	F10d	0	0	0	0	0	0	0		0	0													0	0	0	0	0	0	0		0	0													0	0
935	M	4	F5d	1	0	0	0	0	0	0																0	0	0	0	1	1	0																0	0
936	F	8	F10d			0		0	0	0	0	0	0															1		1	0	1	0	0	0
937	F	9	F10d	1	0	0	0	0	0	0	0	0	0	0	0											0	1	1	0	0	0	0	0	0	0	0	0											0	0
938	F	11	F10d		1	1	0	0	0	0	0	0	0	0	0	0	0										0	0	1	0	0	0	0	0	0	0	0	0	0										0
939	M	5	F5d	0	0	0	0	0		0																1	1	1	1	1		0																0	0
940	F	8	F10d	1	1	1	0	0	0	0	0	0	0													0	0	0	0	0	0	0	0	0	0													0	0
941	M	5	F5d
942	F	6	F5d
943	M	6	F5d	0	0	0	0	0	0	0	0															0	0	0	0	0	0	0	1															0	0
944	M	5	F5d	0	1	0	0	0	0	0																0	0	1	1	1	1	1																1	0
945	F	5	F5d
946	F	10	F10d	0	0	0	0	0	0	0	0	0	0	0	0											0	0	0	0	0	0	0	0	0	1	1	0											0	0
947	M	8	F10d	0	0	0	1	1	0	0	0	0	0	0	0	0	0									0	0	0	0	0	1	1	1	1	1	1	0	1	1									0	0
948	F	8	F10d	1	0	1	0	0	0	0	0	0	0	0												1	0	0	0	0	0	0	0	0	1	0												1	0
949	F	8	F10d	0	0	0	1	1	0	0	0	0	0	0												1	1	1	1	1	1	1	1	1	1	1												0	0
950	M	9	F10d		0																						0																						0
951	M	7	F5d		0		0	0		0	0	0	0														0		0	0		0	0	0	0														0
952	F	10	F10d		0	1		1	1	1	1	1	1	1	1												0	0		0	0	0	0	0	0	0	0												0
953	F	5	F5d	1	1	0	0	0	0	0	0	0														1	1	0	0	0	0	0	0	0														1	0
954	M	8	F10d	0	0	0	0	0	0	0	0	0	0	0												0	0	0	0	0	0	0	0	0	0	0												0	0
955	F	7	F5d
956	F	8	F10d
957	F	8	F10d	1	0	1	0	0	0	0	0	0	0													1	1	1	1	1	0	0	1	1	1													1	0
958	M	12	F10d	1			1	0																		0			0	0																		0
959	M	7	F5d	1	1	1	1	1	0	0	0	0	0													0	0	0	0	1	0	0	0	0	0													0	0
960	M	5	F5d	1	1	1	1	1	0	0	0															0	0	0	0	0	0	0	0															0	0
961	F	5	F5d	1	0	0	0	0	0	0																0	0	0	0	0	0	0																0	0
962	F	14	F15d	0		0	0	0	0		0	0	0	0	0	0	0	0								0		0	0	0	0		0	0	0	0	0	0	0	0								0
963	M	9	F10d	0	0	0	0	0	0	0	0	0	0	0	0	0	0									0	1	0	0	0	0	0	0	0	0	0	0	0	0									0	0
964	F	5	F5d	1	1	0	0	0	0	0																0	0	0	0	0	0	0																0	0
965	M	5	F5d	0	0		0	0		0	0															0	0		0	0		0	0															1	0
966	F	5	F5d	1		0	0	0	0	0																0		0	0	0	0	0																0
967	M	17	F15d
968	F	7	F5d
969	M	5	F5d	0	1	0		0	0	0																0	0	0		0	0	0																0	0
970	F	5	F5d	1	1	1	0	0	0	0																0	0	1	1	1	0	0																0	0
971	F	6	F5d	0	1	1	1	0	0	0		0	0													0	0	0	0	0	0	0		0	0													0	1
972	F	16	F15d	0	0	0	0		0	0	0	0	0		0		1	0	0	1	0	0	0			0	0	0	0		1	0	0	0	0		0		0	1	1	1	1	1	0			1	1
973	F	7	F5d	1	1	1	1	0	0	0	0	0														0	0	0	1	0	0	0	0	0														0	0
974	F	14	F15d	1	1	0	0	0	0	0	0	0	0		0	1	0	0	0	1						1	1	1	1	1	1	0	0	0	1		0	0	0	0	1	1						0	0
975	M	9	F10d
976	M	8	F10d	0	1	1	1	1	0	0	1	1	0													0	0	0	0	0	0	0	0	0	0													0	0
977	M	7	F5d
978	F	15	F15d		0	0	0	0	0	0	0	0	0	0	0	0	0	0	0	0	0	0					0	0	0	0	0	0	0	0	0	0	0	0	0	0	0	0	0	0					0
979	F	14	F15d
980	F	5	F5d	1	0	0	0	0	0	0																0	0	0	0	0	1	0																0	0
981	F	7	F5d	1	1	0	0		0	0	0	0	1	0												0	0	1	0		0	0	0	0	0	0												0	0
982	M	8	F10d
983	F	15	F15d	1	1	1	1	0	0	0	0	0	0	0	0	0	0	0	0	0						0	0	0	0	1	0	0	0	0	0	0	0	0	0	0	0	0						0	0
984	F	14	F15d	1	0	1	0	0	0	0	0	0	0	0	0	0	0		0	0						0	0	0	0	0	0	0	1	0	0	0	0	0	0		0	0						0	0
985	F	5	F5d	1	0	0	0	0	0																	0	0	0	0	0	0																	0	1
986	F	9	F10d	0	0	0	0	0	0	0	0	0	0	0	0	0										0	0	0	1	0	0	0	0	0	0	0	0	0										0	1
987	F	5	F5d	1	0	0	0			0																1	1	1	1			1																1	1
988	F	8	F10d	0	0	0	0		0	0	0	0					0				0					0	0	0	0		0	0	0	0					0				0					0	1
989	F	5	F5d	1	1	0	0	0	0	0	0															0	0	0	1	1	1	1	1															0	1
990	F	7	F5d	1	1		0	0	0	0	0															0	0		1	0	1	1	0															0	0
991	F	8	F10d
992	M	5	F5d
993	M	13	F15d		0	0	0	0	0	0	0	0	0	0	0	0	0	0	0								0	0	0	0	1	1	1	1	1	1	1	1	0	0	0								1
994	M	5	F5d	0	0	0	0	1	0	0	0															0	0	0	0	0	0	0	0															0	0
995	M	5	F5d	0	0	0	0	0	0	0	0	0	0													0	0	0	0	0	0	0	0	0	0													0	0
996	F	6	F5d
997	F	6	F5d
998	F	5	F5d	0	1	1	0	0	0	0	0	0														0	0	1	1	1	1	1	1	1														0	0
999	F	5	F5d	1	1	1	1	0	0	1																1	0	0	0	1	1	0																0	0
1000	F	8	F10d	1	1		1	0																		0	0		1	0																		0	0
1001	M	6	F5d	0	0	1	0	0	0	0	0															0	0	0	0	0	0	0	0															0	0
1002	F	16	F15d	0	1	0	0	0	0	0	0	0	0	0	0	0	0	0	0	0	1	1				0	0	0	0	0	0	0	0	0	0	0	0	0	0	0	0	0	0	0				0	0
1003	F	6	F5d
1004	M	20	F20d	1	1	1	0		0	0	0	0	0	0	0	0	0	0	0	0	0	0	0	0	0	1	1	1	0		0	0	0	0	0	0	0	0	0	0	0	0	0	0	0	0	0	0	0
1005	M	8	F10d	1	1	1	0	0	1	0	0	1	0													0	0	0	0	0	0	0	0	0	0													0	0
1006	M	7	F5d		0	0	0	0	0	0	0	0															0	0	0	1	0	1	0	0															0
1007	F	14	F15d	1	1	0	0	1	0	0	0	0	0	0	0	0	0	0								1	1	0	0	1	0	1	1	1	1	1	1	1	1	0								0	0
1008	M	5	F5d	0	0	0	0	0	0	0																1	1	1	1	1	1	0																0	0
1009	F	6	F5d	0	0	0	0	0	0	0	0															0	0	1	1	1	1	0	0															0	0
1010	M	6	F5d	0	0	0	0	0	0	0	0															0	0	0	1	1	1	1	1															0	0
1011	M	8	F10d	0	0	0	0	0	0	0	0	0	0	0												0	0	0	0	0	0	0	0	0	0	0												0	0
1012	F	14	F15d	1	0	0	0	0	0	0	0	0	0	0	0	0	0	0	0	0						0	0	0	0	0	0	0	0	0	0	0	0	0	0	0	0	0						0	0
1013	F	9	F10d		0	0	0	0	0	0	0	0	0	0	0	0	0										0	0	0	0	0	0	0	0	0	0	0	0	0										0
1014	M	6	F5d	0	0	0	0	0	0	0	0															0	0	0	1	0	1	0	0															0	0
1015	F	6	F5d	0	0	0	0	0	0	0	0															0	0	0	0	1	0	0	0															0	0
1016	F	9	F10d				0		1	0		0			0	0													0		0	0		0			0	0
1017	F	9	F10d	0	0	0	0	0	0	0	0	0	0	0	0											1	0	0	1	1	1	0	0	0	1	1	1											0	1
1018	F	5	F5d	1	1	0	0	0	1		0															1	0	0	1	1	0		0															0	0
1019	F	5	F5d	1	0	0	0	0	0	0																0	1	1	1	0	0	0																0	0
1020	M	8	F10d	1	1	1	0	0	0	0	0	0	0	0												0	0	0	0	0	0	0	0	0	0	0												1	0
1021	F	8	F10d	1	1	0	0	0	0	0	0	0		0	0											0	0	0	0	0	0	0	0	0		0	0											0	0
1022	F	9	F10d	1	0	0	0	0	0	0	0	0	0	0	0	0										0	0	1	1	1	1	1	1	1	1	0	0	1										0	0
1023	F	7	F5d	0	0	0	0	0	0	0	0	0	0	0												0	0	0	0	0	0	0	0	0	0	0												0	0
1024	F	14	F15d	0	1	0	0	0	0				0	0	1	0	0	0	0							0	0	0	0	0	0				0	0	0	0	0	0	0							0	0
1025	F	14	F15d	1	1	1	0	0	0	1	0	0	0	0	0	0	0	0	0	0						0	0	0	0	1	1	0	0	0	0	0	0	0	0	1	0	0						0	0
1026	F	9	F10d	0	1	0	0	0	0	0	0	0	0	0												0	0	0	0	0	1	0	0	0	0	0												0	0
1027	F	8	F10d	0	0	0	0	0	0	0	0	0	0	0												0	0	0	0	0	1	1	1	1	1	1												0	0
1028	F	8	F10d	1	1	0	0	0	0	0	0	0														0	0	0	0	0	0	0	0	0														0	1
1029	M	9	F10d
1030	M	6	F5d	0	0	0	0																			0	0	0	0																			0	0
1031	M	7	F5d	0	0	0	0																			0	0	0	0																			0	1
1032	F	8	F10d		0	0	0		0	0	0	0	0														0	0	1		0	1	1	1	1														0
1033	F	6	F5d	1	1	1	1	0	0	0	0															1	1	1	1	0	1	1	1															0	0
1034	F	6	F5d	0	0	0	0	0	0	0	0															0	1	1	1	1	0	0	0															0	0
1035	M	5	F5d	0	0	0	0	0	0	0																0	0	0	0	0	0	0																1	0
1036	F	6	F5d	0	1	0	0	0	0	0		0	0													0	0	0	1	0	0	0		0	0													0	0
1037	F	5	F5d	0	0	0	1	0	0	0																0	0	0	0	0	0	0																0	0
1038	F	5	F5d	0	1	0	0	0	1	0																0	0	0	0	0	0	0																0	0
1039	F	14	F15d
1040	F	8	F10d
1041	M	14	F15d	0	0	0	0	0	0	0	0	0	0	0	0	0	0	0	0	0						0	0	0	0	0	0	0	0	0	0	0	0	0	0	0	0	0						0	0
1042	F	5	F5d	0	1	1	0	0	0	0																1	0	1	1	1	1	1																0	0
1043	M	14	F15d	1	1	1	0	0	0	0	0	0	0	0	0	0	0	0	0	0						1	0	1	1	1	1	1	1	1	1	1	1	1	1	1	1	1						0	0
1044	M	8	F10d		0	1	0	0		0		0		0													1	0	1	1		1		1		1													0
1045	F	8	F10d	0	1	1	1	1	0	0	1	0	1	1												0	0	1	1	1	1	0	1	1	1	1												0	0
1046	M	5	F5d
1047	F	8	F10d	0	1	0	0	1	0	0	1	0	0													0	0	0	0	1	0	0	0	1	0													0	1
1048	F	6	F5d
1049	M	6	F5d
1050	F	6	F5d
1051	M	6	F5d
1052	M	5	F5d
1053	F	6	F5d	1	1	1	0	0	0	0	0															1	1	0	1	0	0	1	0															0	0
1054	M	14	F15d	0	1	1	0	0	0	0	0	0	0	0	0	0	0	0	0	0						0	0	0	0	0	0	0	0	0	0	0	0	0	0	0	0	0						0	0
1055	F	13	F15d
1056	F	5	F5d
1057	M	8	F10d
1058	F	10	F10d
1059	M	5	F5d
1060	M	8	F10d
1061	M	7	F5d
1062	M	14	F15d	0	0	0	0	0		0		0														0	0	0	0	0		0		0														0	0
1063	M	9	F10d	1	0	0	1	0	0	0	0	0	0	0	0											0	1	1	0	1	0	1	1	1	1	0	0											0	0
1064	F	6	F5d	0	0	0	0	0	0	0	0	0														1	1	1	1	1	1	1	1	1														1	0
1065	M	15	F15d
1066	M	14	F15d	0	1	1	0	0	0	0	0	0	0	0	0	0	0	0	0	0						1	1	0	1	0	1	0	1	1	1	0	0	1	1	0	0	1						0	0
1067	F	14	F15d	0	1	0	0	1	0	0	0	0	0	0	0	0	0	0	0	0						0	1	0	1	0	0	1	0	0	0	0	0	0	0	0	0	0						1	1
1068	F	14	F15d	0	0	0	0	0	0	0	0	0	0	0	0	0	0	0	0	0						0	0	0	1	1	1	1	0	0	0	0	0	0	0	0	0	0						0	0
1069	F	8	F10d	0	0	0	0	0	0	0	0	0	0													0	0	0	0	0	1	1	1	0	0													0	0
1070	F	13	F15d		0	0	0	0	0	0	0	0	0	0	0	0	0	0	0	0							1	0	0	0	0	0	0	0	0	0	0	0	0	0	0	0							0
1071	F	12	F10d	0	0	0	0	0	0																	0	0	1	0	1	0																	0	0
1072	F	5	F5d	1	0	0	0	0	0	0	0															0	1	0	1	1	1	1	1															0	1
1073	F	14	F15d	1	1	0	0	0	0	0	0	0	0	0	0	0	0	0	0							0	0	0	0	1	1	1	1	1	1	1	1	0	0	0	0							0	0
1074	F	14	F15d	1	0	0	0	0	0	0	0	0	0	0	0	0	0	0	0	0						0	0	0	0	1	0	0	0	0	0	0	0	0	0	0	0	0						0	0
1075	F	9	F10d	1	1	1	1	0	0	0	0	0	0	0												1	1	1	1	1	1	1	0	0	0	0												0	0
1076	F	10	F10d		1	0	0	0	0	0	0	0	0	0													0	0	0	0	0	0	0	0	0	0													0
1077	F	14	F15d	0	1	0	0	0	0	0	0	0	0	0	0	0	0	0	0	0						1	1	1	1	1	1	1	1	1	1	1	0	1	1	1	0	1						0	0
1078	F	8	F10d	0	0	0	0	0	0	0	0	0	0	0												0	0	0	0	0	0	0	0	0	0	0												0	0
1079	F	8	F10d		1	0			0	0			0														0	1			0	0			0														0
1080	F	8	F10d
1081	F	8	F10d
1082	F	8	F10d
1083	F	14	F15d
1084	F	13	F15d	1	1	1	0	0	0	0	0	0	0	0	0	0	0	0								0	0	0	0	1	1	0	0	1	0	0	0	1	1	0								0	0
1085	F	5	F5d	1	0	0	0	0	0	0	0															0	0	0	0	0	0	0	0															0	0
1086	F	14	F15d	1	0	0	1	0	0	0	0	0	0	0		0	0	0	0	0						0	0	0	0	0	0	0	0	0	0	0		0	0	0	0	0						0	0
1087	F	5	F5d	1	0	0	1	0	0	0																1	1	0	0	0	1	1																0	0
1088	F	5	F5d	1	1	0	0	0	0	0																1	0	0	0	0	0	0																1	0
1089	M	8	F10d	0	0	0	0	0	0	0	0	0	0	0												0	0	0	0	0	0	0	0	0	0	0												0	0
1090	M	9	F10d
1091	M	8	F10d	0	0	0	0	0	0	0	0	0	0	0	0	0										0	0	0	0	0	0	0	0	0	0	0	1	0										0	0
1092	M	11	F10d
1093	M	7	F5d	0	0	0	0	0	0	0	0	0														0	0	0	0	0	0	0	0	0														0	0
1094	F	8	F10d	0	0	0	0	0	0	0	0	0	0	0												1	0	0	0	0	0	0	0	0	0	0												0	0
1095	M	14	F15d	0	0	0	0	0	0	0	0	0	0	0	0	0	0	0	0							0	0	0	1	0	0	0	0	0	0	0	0	0	0	0	0							0	0
1096	F	8	F10d
1097	F	8	F10d	0	0	0	0	0	0	0	0	0	0	0												0	0	0	0	0	0	0	0	0	0	0												0	0
1098	F	14	F15d	0	0	1	1	0	1	0	1	0	0	0	0	0	0	0	0	0						1	0	0	0	0	1	0	0	1	0	1	0	0	1	0	0	0						0	0
1099	M	9	F10d
1100	M	5	F5d
1101	F	7	F5d	0	0	0	0	0	0	0	0															1	0	1	1	0	0	0	0															0	0
1102	F	8	F10d	0	1	0	0	0	0	0	0	0	0													1	0	1	1	1	1	1	1	0	0													0	0
1103	M	8	F10d	1	0	0	0	0	0	0	0	0	0													0	1	0	0	1	0	0	1	0	0													0	0
1104	F	14	F15d	0	0	0	0	0	0	0	0	0	0	0	0	0	0	0	0	0						0	0	0	0	0	0	0	0	0	0	0	0	0	0	0	0	0						0	0
1105	F	8	F10d	0	0	0	0	0	0	0	0	0	0													0	0	0	0	0	0	0	0	0	0													0	0
1106	M	8	F10d	0					1	1																0					0	0																0
1107	F	5	F5d	0	0	0	0	0	1	0																0	0	0	0	0	0	0																1	1
1108	M	18	F20d	0	0	0	0	0	0	0	0	0	0	0	0	0	0	0	0	0	0	0	0	0		0	0	0	0	0	0	0	0	0	0	0	0	0	0	0	0	0	0	0	0	0		0	0
1109	M	5	F5d	1	1	1	1	0	0	0	0	0	0	0												0	0	0	0	0	0	0	0	0	0	0												1	1
1110	F	5	F5d	1	0		0		0	0	0															0	0		0		1	0	0															0	0
1111	M	8	F10d	0	0	0	1	0		1	0	0	0													0	0	0	0	0		0	0	0	0													0	0
1112	F	5	F5d
1113	F	8	F10d
1114	F	8	F10d
1115	M	5	F5d
1116	F	6	F5d	1	1	0	0	0	0	0	0	0	0													0	0	0	0	0	0	0	0	0	0													0	0
1117	M	5	F5d	0	1	0	0	0		0	0															0	0	0	0	0		0	0															0	0
1118	M	5	F5d	1	1	1	1	0	0	0	0															1	0	0	0	0	1	1	0															0	0
1119	M	5	F5d	1	1	0	0	0	0	0																0	0	0	0	1	1	0																1	0
1120	M	8	F10d	0	0	0	0	0	0	0	0	0	0													1	1	1	1	0	0	0	1	1	0													0	0
1121	F	4	F5d	0	0		0	0	0	0	0															0	0		0	0	0	0	0															0	0
1122	F	5	F5d	1	0	0			0	0																0	1	1			1	0																0	0
1123	F	20	F20d
1124	F	18	F20d	0	1	0	0	0	0	0	0	0	0	0	0	0	0	0	0	0	0	0	0			0	0	0	0	0	0	0	0	0	0	0	0	0	0	0	1	0	0	0	0			0	0
1125	M	7	F5d	0	0	0	0	0	0	0	0	0	0	0	0											0	0	0	0	0	0	0	0	0	0	0	0											0	0
1126	F	9	F10d
1127	M	5	F5d
1128	M	12	F10d	1	0				0																	0	0				0																	0	0
1129	F	8	F10d	0	1	1	1	1	0	0	1	0	1	0												0	0	0	0	0	0	0	0	0	0	0												0	0
1130	F	8	F10d	0	0	0	0	0	0		0	0	0	0												1	1	1	0	0	0		0	0	0	0												0	1
1131	F	4	F5d	0	1	0	0	0	0	0																0	0	0	0	0	0	0																0	0
1132	M	5	F5d	0	0	0	0	0	0	0																0	0	0	0	0	0	0																0	0
1133	F	5	F5d	1	1	1	0	0	0	0																0	0	0	0	0	0	1																0	0
1134	F	9	F10d	0	0	0	0	0	0	0	0	0	0	0	0											0	0	0	0	0	0	0	0	0	0	0	1											0	0
1135	F	7	F5d	1	0	0	0	0	0	0	0	0														0	0	0	0	0	0	0	0	0														0	1
1136	M	5	F5d	0	0	1	1	0	0	0																0	0	0	0	0	0	0																1	0
1137	M	12	F10d
1138	M	5	F5d
1139	F	13	F15d	1	1	1	1	1	1	1	1	0	0	0	0	0	0	0	0							0	1	1	1	0	1	0	0	0	0	0	0	0	0	0	0							1	0
1140	F	7	F5d	1	0	0	0	0	0	0	0	0														0	0	0	0	0	0	0	0	0														0	0
1141	F	6	F5d		0	1	0	1	1	0	0	0	0	0													0	0	0	0	0	0	0	0	0	0													0
1142	F	5	F5d	0	0	0	0	0	0	0	0	0	0													0	0	0	1	0	0	0	0	0	1													0	0
1143	M	5	F5d
1144	F	5	F5d	1	0	1	0	0		0	1	1	0													0	0	0	0	0		0	0	0	0													0	0
1145	F	9	F10d	0		0	0	0	0	0	0	0														0		0	0	0	0	0	0	0														0
1146	M	8	F10d	0	1	1	1	0	0	0	0	0	0	0	0											0	0	0	0	0	0	0	0	0	0	0	0											0	0
1147	F	8	F10d
1148	F	14	F15d	1	1	0	0	0	0	0	0	0	0	0	0	0	0	0	0	0						0	0	0	0	0	0	0	0	0	0	0	0	0	0	0	0	0						0	0
1149	F	5	F5d
1150	F	5	F5d	0	0		0	0	0	0	0	0	0	0												0	0		0	0	0	0	0	0	0	0												0	0
1151	M	14	F15d
1152	F	6	F5d
1153	F	6	F5d	1	0	0	0	0	0	0	0															1	1	1	1	1	1	1	1															0	0
1154	F	8	F10d	0	0	0	0	0			0	1	0	0												0	0	0	0	0			0	0	0	0												0	0
1155	F	14	F15d	0	1	1	0	0	0	1	0	0	0	0	0	0	0	0	0							1	1	1	0	0	0	0	0	0	0	0	0	0	0	0	0							0	0
1156	M	5	F5d
1157	F	5	F5d		0	0	0	0		0																	1	1	1	1		1																	0
1158	F	5	F5d	0	1	0	0	0	0	0	1															0	0	0	0	0	0	0	0															0	0
1159	F	5	F5d	0	1	0	0	1	0	0	0	0	0													1	0	0	0	0	0	0	0	0	0													0	0
1160	M	5	F5d	0	1	0	0	0	0	0	0	0	0													0	0	0	0	0	0	0	0	0	0													0	0
1161	F	5	F5d
1162	M	8	F10d	0	1	1	1	0	1	0	0	0	0	0												0	0	0	0	0	0	0	0	0	0	0												0	0
1163	F	4	F5d	1	1	0	0	0	0																	0	0	0	1	1	1																	0	0
1164	M	4	F5d
1165	F	8	F10d
1166	M	5	F5d	0	0	1	0	1	0	0																0	1	0	1	1	1	1																1	0
1167	M	5	F5d	0	0	0	0	0	0	0																0	0	0	0	0	0	0																0	0
1168	F	9	F10d	0	0	0		0	0		0	0	0	0		0										1	0	0		0	1		1	1	0	1		1										0	0
1169	F	8	F10d					0			0	0	0																	1			0	0	0
1170	F	5	F5d
1171	M	10	F10d	0	0	0	0	0	0	0	0	0	0	0	0											0	0	0	0	0	0	0	0	0	0	0	0											0	0
1172	F	8	F10d	0	1	0	0	1	0	0	0	0	0	0	0	0										0	0	0	0	0	0	0	0	0	0	0	0	0										0	0
1173	F	8	F10d		0	0	1	1	0	0	0	0	0	0	0	0											0	0	0	0	0	0	0	0	0	0	0	0											0
1174	M	8	F10d	0	0	0	0	0	0	0	0	0	0													0	0	0	0	0	0	0	0	0	0													0	0
1175	M	8	F10d	1	0	0	0	0	0	0	0	0	0													0	0	0	0	0	0	0	0	0	0													0	0
1176	F	8	F10d	0	0	0	0	0	0	0				0												1	1	1	1	1	1	1				1												0	0
1177	F	8	F10d
1178	F	7	F5d
1179	M	8	F10d
1180	M	7	F5d
1181	F	5	F5d	0	0	0	0	0	0	0	0	0	0													1	0	1	0	1	1	1	1	1	1													0	0
1182	M	5	F5d	1	1	0	0	0	0	0	0	0	0													1	0	0	0	1	0	0	0	0	0													0	0
1183	F	5	F5d	0	1	1	1	0	0	0																1	1	1	1	1	1	1																0	1
1184	M	6	F5d
1185	F	5	F5d	0	0	1	1	0	0	0																1	0	0	1	0	0	0																0	0
1186	M	5	F5d		1	1	0	0	0	0	0	0															0	0	0	0	1	1	1	1															1
1187	F	5	F5d	0	1	0	0	0	0	0	0															0	0	0	0	0	0	0	0															0	0
1188	F	5	F5d
1189	F	5	F5d	0	0		0	0		0																0	0		0	1		0																0	0
1190	F	5	F5d	0	0	0	0	0	0	0																1	1	1	1	1	1	1																0	0
1191	M	7	F5d		0	0	0	0	0	0	0	0	0	0	0												0	0	0	0	0	0	0	0	0	0	0												0
1192	M	5	F5d	0	1	0		0	0	0	0	0	0													0	0	0		0	0	0	0	0	0													0	0
1193	F	5	F5d	1	1	0	0	0	0	1																1	0	1	1	1	1	1																0	1
1194	F	5	F5d	0	0	1	0	0	0	0																0	0	0	0	0	0	0																0	0
1195	F	8	F10d	0	0	0	0		0	0	0	0	0													0	0	1	0		0	0	0	0	0													0	0
1196	F	7	F5d
1197	M	8	F10d	0	1	0	0	1	0	0	0	0	0	0	0	0										0	0	0	0	1	1	0	0	1	0	0	0	0										0	0
1198	F	8	F10d	0	0	0	0	0	0	0	0	0	0													0	0	0	0	0	0	0	0	0	0													0	0
1199	F	7	F5d
1200	M	5	F5d	0	0	0	0	0	0	0																0	0	1	1	1	1	1																0	0
1201	F	9	F10d	0	0	0	0	0	0	0	0	0	0	0	0											0	0	0	0	1	0	0	0	0	0	0	0											1	0
1202	F	8	F10d		0	0	0	0		0	0	0	0	0	0	0											0	1	0	0		1	1	1	1	1	1	0											0
1203	M	10	F10d		0	0	0	0	0	0	0	0	0	0	0	0	0										0	0	0	0	0	0	0	0	0	0	0	0	0										0
1204	M	8	F10d	0	1	0	1	1	0	1	0			0												0	1	0	1	1	1	1	1			0												0	0
1205	F	8	F10d	0	0	0	0	0	0	0	0	0	0	0												1	0	0	1	1	1	0	1	1	1	0												0	0
1206	M	8	F10d	0	0	0			0	0	0	0	0													0	0	0			0	0	0	0	0													0	0
1207	F	15	F15d			0	0	0	0	1	0	0	0	0	0	0	0	0	0	0	0	0	0					0	0	0	0	0	1	0	0	1	1	1	1	0	0	0	0	0	0
1208	M	16	F15d	0	0	0	0	0	0	0	0	0	0	0	0	0	0	0	0	0	0	0	0	0		0	0	0	0	0	0	0	0	0	0	0	0	0	0	0	0	0	0	0	0	0		0	0
1209	F	6	F5d	1	1	1	0	0	0	0	0															0	0	0	0	0	0	1	0															0	0
1210	F	5	F5d
1211	M	7	F5d
1212	F	8	F10d		1	0	0	0	0	0	0	0	0	0		0											0	0	0	1	0	0	0	0	0	0		0											0
1213	F	14	F15d	0	0	0	0	0	0	0	0	0	0	0	0	0	0	0	0	0						0	0	0	0	0	0	0	0	0	0	0	0	0	0	0	0	0						0	0
1214	F	5	F5d	0	1	0	0	0	0	0	0															0	0	0	1	1	1	1	1															1	0
1215	M	5	F5d
1216	F	8	F10d
1217	F	8	F10d
1218	F	5	F5d	0	1	1	0	0	0	0																0	0	0	0	0	1	0																0	0
1219	F	5	F5d	1	1	1	1	0	0	0																1	1	1	1	1	1	1																0	0
1220	F	5	F5d	0	0	0	0	0	0	0																0	0	0	1	1	1	1																0	0
1221	F	5	F5d	0	0	0	0	0	0	0																1	1	0	1	0	1	0																0	0
1222	F	4	F5d	0	0	0	0	0	0	0	0	0														0	0	1	0	1	1	1	0	0														0	0
1223	F	5	F5d	1	1	1	1	0	0	0																0	0	0	0	0	0	0																0	0
1224	F	9	F10d	0	0	0	0	0	1	0	0	0	0	0	0											1	0	0	0	0	0	0	1	0	0	1	0											0	0
1225	M	9	F10d		0	0		0	0		0	0	0	0		0											0	0		0	0		0	0	0	1		0											0
1226	F	8	F10d
1227	F	9	F10d	1	1	1	1	0	0	0	0	0	0	0												0	0	1	1	1	1	0	0	0	0	0												0	0
1228	F	8	F10d
1229	F	5	F5d	1																						0																						0
1230	F	5	F5d	0	0	0	0	0	0	0	0															0	0	1	1	1	1	1	0															0	0
1231	F	5	F5d	0	1	1		0	0	0	0															0	1	0		0	1	1	1															0	0
1232	M	8	F10d
1233	F	5	F5d	1	0	0	0	0	0	0																0	0	1	1	1	1	1																0	0
1234	M	9	F10d	0	0	0	0	0	0	0	0	0	0	0												0	0	0	0	0	0	0	0	0	0	0												0	0
1235	F	7	F5d
1236	F	9	F10d
1237	M	8	F10d
1238	M	14	F15d
1239	F	8	F10d
1240	M	5	F5d	0	0	0	0	0	0	0																0	0	1	1	0	0	0																0	0
1241	M	5	F5d
1242	M	8	F10d	0	0	0	0	0	0	0	0	0	0													0	0	0	0	0	0	0	0	0	0													0	0
1243	M	5	F5d			0	0	0	0	0	0																	0	0	0	0	0	0
1244	F	5	F5d	1	1	0	0	0	1	0																0	0	0	0	0	0	0																0	1
1245	F	14	F15d	1	1	1	1	0	1	1	1	1	1	1	1	1	0	0	0	0						0	0	0	0	0	0	0	0	0	0	0	0	0	0	0	0	0						0	0
1246	M	5	F5d		0		0	0	0	1																	0		0	0	0	0																	1
1247	F	5	F5d
1248	F	5	F5d	0	0	0	0	0	0	0																0	0	0	0	0	0	0																0	0
1249	F	4	F5d	1	0	0	1	0	0	0	0															0	1	0	1	0	0	0	0															0	0
1250	F	5	F5d	1	1		0	0	0	0	0															0	0		1	0	0	0	0															0	0
1251	F	5	F5d	0	1	1	0	1	1	1	1	0														0	0	0	0	0	0	0	0	0														0	0
1252	F	5	F5d	0	1	0	0	0	0	0																0	0	0	0	0	0	0																0	0
1253	F	4	F5d	0	1	0	0	0	0	0	0															0	0	0	0	0	0	1	0															0	0
1254	M	4	F5d	0	1	1	1	1	1	0	0															0	0	1	0	0	0	0	0															0	0
1255	F	14	F15d	0	1	1	1	1	0	0	0	0	0	0	0	0	0	0		0	1	0	0			0	1	1	1	1	1	1	1	1	1	1	1	1	1	1		1	0	0	0			0	0
1256	F	4	F5d				0		0			0																	1		0			0
1257	F	5	F5d	0	0	0	0																			0	0	0	0																			0	0
1258	M	5	F5d
1259	F	8	F10d	1	1	1	1	1	1	0	0	0	0	0	0											1	1	1	0	1	1	0	1	0	0	0	0											0	0
1260	F	8	F10d	1	0	0	1	1	0	0	0	0	0	0												0	0	0	0	0	0	0	0	0	0	0												0	0
1261	M	8	F10d	0	1	0	0	0	0	0	0	0														0	0	0	0	0	0	0	0	0														0	0
1262	M	8	F10d	0	0	0	0	0	0	0	0	0	0													0	0	0	0	0	0	0	0	0	0													0	0
1263	F	8	F10d	0	0	0	0	0	0	0	0	0	0													0	0	0	0	0	1	0	0	1	0													0	1
1264	M	8	F10d
1265	M	13	F15d				0		0		0	0	0	0	0		0	0	0										1		1		1	0	1	0	1		1	1	1
1266	M	14	F15d			0		0																				0		0
1267	M	14	F15d	1	1	1	1	1	0	0	0	0	0	0	0	0	0	0	0	0						1	1	1	1	1	1	1	1	1	1	1	1	1	1	1	1	1						0	0
1268	M	9	F10d
1269	F	8	F10d	1	0	0	1	1	0	0	0	0	0													0	0	0	0	1	1	0	1	1	1													0	0
1270	F	14	F15d	1	0		0	0	1	0	0	0	0	0	1	0	0		0	0						1	1		1	1	1	0	0	1	1	1	1	1	1		0	0						0	0
1271	M	6	F5d
1272	M	5	F5d	0	1		0	0			1	1														1	0		0	0			0	0														0	0
1273	F	6	F5d
1274	M	5	F5d		0	0	0	0	0	0	0	0	0														0	0	0	0	0	0	0	0	0														0
1275	F	5	F5d	0	1	1	1	0	0	0	0	0	0													0	1	1	1	0	0	0	0	0	0													0	0
1276	F	8	F10d	1	1	1	0	0	0	1	0	0	0													1	0	0	0	0	0	0	1	0	0													0	1
1277	F	11	F10d	1	0	1	0	0	0	0	0	0	0	0		0	0									0	0	0	0	0	0	0	0	0	0	0		0	0									0	0
1278	F	8	F10d	0	0	0	0	0	0	0	0	0	0	0												0	0	0	0	0	0	0	0	0	0	0												0	0
1279	F	14	F15d	1	1	0	0	0	0	0	0	0	0	0	0	0	0	0	0	0						0	0	0	0	0	0	0	0	0	0	0	0	1	0	0	1	1						0	0
1280	M	5	F5d	0	0	0	0	0	0	0																1	1	1	1	1	1	1																0	0
1281	F	5	F5d
1282	M	8	F10d	0	0	0	0	0	0	0	0	0	0													0	0	0	0	0	0	0	0	0	0													0	0
1283	F	6	F5d		1	0	0	0	0	0	0	0	0	0	0	0											1	1	1	1	1	1	1	1	1	1	1	1											0
1284	F	9	F10d	0	1	0	0	0	0	0	0	0	0	0	0	0										0	0	0	0	0	0	0	0	0	0	0	0	0										0	0
1285	M	7	F5d
1286	M	5	F5d		1	0	0	0		0																	0	1	1	1		0																	0
1287	F	5	F5d	0	0	0	0	0	0	0	0															0	0	0	0	0	0	0	0															0	0
1288	M	8	F10d	0		0	0	0	0	0	0	0	0	0												0		0	0	0	0	0	0	0	0	0												0
1289	F	8	F10d	1	1	1	0	0	0	0	1	0	0													1	1	1	0	0	0	0	1	1	1													1	1
1290	F	8	F10d	0	1	1	0	0	0	0	1	0	0		0											1	1	1	1	1	0	0	0	0	0		0											0	0
1291	F	8	F10d
1292	F	8	F10d	0	0	0	0	0	0	0	0		0	0												1	0	0	0	1	1	1	1		0	1												0	0
1293	F	10	F10d
1294	F	13	F15d	0	0	0	0	0	0	0	0	0	0	0	0	0	0	0	0	0						0	0	0	0	0	0	0	0	0	0	0	0	0	0	0	0	0						0	0
1295	F	14	F15d	0	0	0	0	0	0	0	0	0	0	0	0	0	0	0	0	0	0					1	1	1	1	1	1	1	1	1	1	1	1	1	1	1	1	1	1					0	0
1296	M	8	F10d
1297	F	9	F10d	0	1	0		0	0	0	0	0	0	0												0	0	0		0	0	0	0	0	0	0												0	0
1298	M	8	F10d	1	0	0	0																			1	1	0	0																			0	0
1299	F	21	F20d	0		0	0	0	0	0	0	0	0	0	0	0	0	0	0	0	0	0	0	0		0		0	0	0	0	0	0	0	0	0	0	0	0	0	0	0	0	0	0	0		0
1300	F	5	F5d
1301	M	8	F10d
1302	M	8	F10d		1	0	0	0	0	0	0	0	0														1	0	1	1	0	0	0	0	0														0
1303	F	8	F10d	0	0	1	0	0	0	0	0	0	0													0	0	1	0	1	1	1	0	0	1													0	0
1304	F	8	F10d	0	1	0	0	0	0	0	0	0	0	0												1	0	0	0	0	0	1	0	0	0	0												0	0
1305	M	8	F10d	0	0	0	0	0	0	0	0	0	0	0												0	0	0	1	1	1	1	1	1	1	1												0	0
1306	M	8	F10d	1	0	0	0	0	1	0	0	0	0													0	0	1	1	1	1	1	0	0	0													0	0
1307	F	9	F10d	1	1	0	0	0	0	0	0	0	0	0	0	0	0	0								0	0	0	0	0	0	0	0	0	0	0	0	0	0	0								0	0
1308	F	5	F5d	0	1	1	1	1	0	0	1	0	1													1	1	1	1	1	1	1	1	0	0													0	0
1309	F	14	F15d	0	1	0	0	0	0	0	0	0	0	0	0	0	0	0	0	0	0					0	0	0	0	0	0	0	0	0	0	0	0	0	0	0	0	0	0					0	0
1310	F	5	F5d
1311	F	5	F5d	0	0	0	0	0	0	0	0															1	0	0	0	0	0	0	0															0	0
1312	M	14	F15d
1313	F	5	F5d	0	1	0	0	0	0	0																1	1	0	1	1	1	1																0	0
1314	M	8	F10d	0	1		0				0	0														1	0		0				0	0														0	0
1315	F	8	F10d	1	0	0	0	0	0	0	0	0	0													0	0	0	0	0	0	0	0	0	0													0	0
1316	M	5	F5d	1	1	1	0	0	0	0																0	1	1	0	1	1	1																0	0
1317	M	8	F10d	0		0	0	1	1	0																0		0	0	1	0	1																0
1318	F	8	F10d
1319	F	5	F5d		0	0	0		0	0	0	0	0														0	0	0		1	0	0	0	0														0
1320	M	5	F5d
1321	F	8	F10d
1322	M	8	F10d
1323	F	8	F10d	1	1	1	1	0	0	0	0	0	0													1	0	0	0	1	1	0	0	0	0													1	1
1324	F	8	F10d	0	0	0	0	0	0	0	0	0														0	0	0	0	1	0	0	0	0														0	0
1325	F	8	F10d	1	1	1	1	1	0	1	1	0	1	1												0	0	0	0	0	1	1	1	0	1	1												0	0
1326	M	8	F10d	1	1	0	0	0	0	0	1	0	0	0												0	0	0	0	0	0	0	0	0	0	0												0	0
1327	F	10	F10d	0	1	0	0	0	0	0	0	0	0	0	0	0	0	0								0	0	0	0	0	0	0	0	0	0	0	0	0	0	0								0	0
1328	F	14	F15d	1	0	0	0	0	0	0	0	0	0	0	0	0	0	0	0							0	0	0	0	1	0	1	0	0	0	0	1	0	0	0	1							0	0
1329	F	7	F5d	0	0	0	0	0	0	0	0	0														0	1	0	0	0	0	0	0	0														0	0
1330	M	8	F10d
1331	F	8	F10d	0	0	0	0	0	0	0	0	0	0													1	0	0	1	1	0	0	1	0	1													0	0
1332	M	8	F10d		1	1	0	0	0	0	0	0	0														0	0	0	0	1	0	0	0	0														1
1333	M	9	F10d
1334	F	8	F10d	0	0	0	0	0	0		0	0			0	0	0									0	0	0	0	0	0		0	0			0	0	0									0	0
1335	M	14	F15d	0	0	0	0	0	0	0	0	0	0	0	0	0	0	0	0	0						0	0	0	0	0	0	0	0	0	0	0	0	0	0	0	0	0						0	0
1336	F	14	F15d	0	0	0	0	0	0	0		0	0				0	0	0	0						0	0	0	0	0	0	1		1	0				0	0	0	1						0	0
1337	F	15	F15d
1338	M	8	F10d		0	0	0	0	0	0	0	0	0	0	0	0											0	0	0	0	0	0	0	0	0	0	0	0											0
1339	M	8	F10d
1340	F	5	F5d	0	1	0	0	0	0	0																0	0	0	1	1	1	1																0	0
1341	F	5	F5d	0	1	0	0	0	0	1	0															0	0	0	0	0	0	0	0															0	0
1342	F	5	F5d	1	0		0	0	0	0	0	0														1	0		0	0	0	0	0	0														0	0
1343	F	5	F5d
1344	M	8	F10d	1	1	1	0	0	0	0		0														0	0	0	0	1	0	0		0														0	0
1345	F	8	F10d	0	1	0	0	0	0	0	0	0														0	0	0	0	1	0	0	0	0														0	0
1346	M	8	F10d	0	1	0	0	0	0	0	0	0	0													0	0	0	0	0	0	0	0	0	0													0	0
1347	F	5	F5d
1348	M	5	F5d	0	1	1		1	0																	0	0	0		1	1																	0	0
1349	M	5	F5d	1	1	1	1	0	0	0																0	0	1	1	1	0	0																0	0
1350	F	8	F10d	1	1	1	1	1	0	1	0	0	0	0	0											0	0	1	1	1	1	1	0	0	0	0	0											1	0
1351	M	8	F10d
1352	M	14	F15d	0	0	0	0	0	0	0	0	0	0	0	0	0	0	0		0	0					0	0	0	0	0	0	0	0	0	0	0	0	0	0	0		0	0					0	0
1353	M	8	F10d	0	0	0	0	0	0	0	0	0	0	0												0	0	0	0	0	0	0	0	0	0	0												0	0
1354	F	8	F10d
1355	F	13	F15d	0	0	0	0	0	0	0	0		0	0	0	0	0	0	0							0	0	1	0	1	0	0	0		0	0	0	0	0	0	0							0	0
1356	F	13	F15d	1	0	1	1	0	0	0	0	0	0	0	0	0	0	0								0	0	0	0	0	0	0	0	0	0	0	0	0	0	0								0	0
1357	F	8	F10d
1358	F	13	F15d	0	1	0	0	0	0	0	0	0	0	0	0	0	0	0								0	0	0	0	0	0	0	0	0	0	0	0	1	0	0								0	0
1359	M	5	F5d	0	0	1	1	0	1	0	1	0														0	0	0	0	0	0	0	0	0														0	1
1360	M	5	F5d	1	1	0	0	1	1	0																0	0	1	0	0	0	0																0	0
1361	F	8	F10d
1362	F	12	F10d	1	0	0	1	0	0	0	0	0	0	0	0	0	0									0	0	0	0	0	0	0	0	0	1	0	0	0	0									0	0
1363	M	8	F10d
1364	M	5	F5d			0	1		0	0				0														0	0		0	0				0
1365	M	7	F5d	1	1	0		0		0																0	0	1		0		0																0	0
1366	M	7	F5d		1	0	0	0	0	0	0																0	0	0	0	0	0	0																0
1367	M	14	F15d	0	1	0	0	0	0	0	0	0	0	0	0	0	0	0	0							0	0	0	0	0	0	0	0	0	0	0	0	0	0	0	0							0	0
1368	F	9	F10d	0	0	0	1	0	1	0	1	1	0	0												0	0	0	0	0	0	0	0	0	0	0												0	0
1369	M	9	F10d	0	0	0	0	0	0	0	0	0	0		0											0	0	0	0	0	0	0	0	0	0		0											0	0
1370	F	14	F15d	0	0	0	0	1	1	0	1	0	0	0	0	0	0	0	0	0	0					0	0	0	0	0	0	0	0	0	0	0	1	1	1	1	1	0	0					0	0
1371	F	8	F10d	0	1	1	1	0	0		0	0	0	0	0	0										0	0	1	1	1	0		0	0	0	0	0	0										0	1
1372	M	8	F10d	1	1	0	0	0	0	0	0	0	0	0												1	0	0	1	1	1	0	0	0	0	0												0	0
1373	M	16	F15d		0	1	0	0	0	0		0	0	0	0	0	0	0	0	0		0	0				1	1	1	1	1	1		1	1	1	1	1	1	1	1	1		1	1				1
1374	F	8	F10d
1375	F	8	F10d
1376	M	14	F15d	0	0	0	0	0	0	0	0	0	0	0	0	0	0	0	0	0	0					0	1	1	1	0	0	0	0	0	0	0	0	0	0	0	0	0	0					0	0
1377	M	15	F15d		0		0	0	0	0	0	0	0	0	0	0	0	0	0	0	0	0	0				0		0	0	0	0	0	0	0	0	0	0	0	0	0	0	0	0	0				0
1378	F	21	F20d	0	0	0	0	0	0	0	0	0	0	0	0	0		0	0	0	0	0	0	0		0	0	0	0	0	0	0	0	1	1	0	0	0		1	0	0	0	0	0	1		0	0
1379	F	5	F5d	0	0	0	0	0	1	0																0	0	0	0	0	1	0																0	0
1380	F	5	F5d	0	0	1	0	0	0	0	0	0	0													0	1	1	1	1	1	1	1	1	1													0	0
1381	M	8	F10d	0	0	0	0	0	0	0	0	0	0													0	0	0	0	0	0	0	0	0	0													0	1
1382	F	8	F10d	0	1	1	1	0	0	1	0	0	0													0	0	0	0	0	0	0	0	0	0													0	0
1383	F	8	F10d	1	0	0	0	0	0	0	0	0	0													1	0	0	0	1	0	0	0	0	0													0	0
1384	F	21	F20d	0	1	1	1	0	0	0	0	0	0	0	0	0	0	0	0	0	0	0	0	0	0	0	0	1	1	1	0	0	0	0	1	0	0	0	0	0	0	0	0	0	0	0	0	0	0
1385	M	7	F5d	0	1	1	1	1	1	0	1	1	1	1	1	1	1									0	0	0	0	1	0	0	0	0	0	0	0	0	0									0	0
1386	M	8	F10d	0	0	0	0	0	0	0	0	0	0	0												0	0	0	0	0	1	1	1	1	1	1												0	0
1387	F	5	F5d
1388	M	7	F5d	0	0	0	0	1	0	0	0	0	0	0	0	0	0									0	0	0	0	0	0	0	0	1	0	0	0	0	0									0	0
1389	F	8	F10d	0	1	1	1	0	0	0	0	0	0													0	0	1	1	1	0	0	0	0	0													0	0
1390	F	12	F10d	1	0	0	0	0	0	0	0	0	0	0	0	0	0	0								1	1	1	1	1	1	0	0	0	0	0	0	0	0	0								0	1
1391	F	12	F10d	1	1	0	0			0		0														0	0	1	1			0		1														0	1
1392	F	5	F5d
1393	M	8	F10d	0	1	0	0			0	0	0	0	0												0	0	0	0			0	0	0	0	0												0	0
1394	F	20	F20d	0	0	0	0	0	0	0	0	0	0	0	0	0	0	0	0	0	0	0	0	0	0	0	1	0	0	0	0	0	1	0	0	0	1	0	0	0	0	0	0	0	0	0	0	0	0
1395	F	5	F5d	1	1	1	1	0	0	0	0															1	1	1	1	1	0	0	0															0	0
1396	M	6	F5d
1397	F	9	F10d	0	1	0	0	0	0	0	0	0	0	0	0											0	1	0	1	1	1	1	1	1	1	1	1											0	0
1398	F	5	F5d	1	1	0	0	0	0	0	0	0	0													0	0	0	0	0	1	0	0	0	0													0	0
1399	F	5	F5d
1400	M	5	F5d	1		0	1	0	0	0	0	0	0													0		1	0	0	0	0	0	0	0													0
1401	F	5	F5d		1	0	0	0	0	0	0	0	0														0	0	0	1	1	0	0	0	0														0
1402	F	5	F5d	0	0	0	0	1	0	0																0	0	0	1	0	0	0																0	0
1403	M	5	F5d	0	0	0	0	0	0	0	0															0	0	0	1	1	1	0	0															1	1
1404	M	7	F5d
1405	M	5	F5d
1406	M	7	F5d
1407	F	5	F5d
1408	F	6	F5d
1409	F	5	F5d
1410	M	5	F5d
1411	F	7	F5d	1	1	1																				0	0	0																				0	0
1412	F	6	F5d	0	0	1		0	0	0		0														0	0	0		0	0	0		0														0	0
1413	F	5	F5d	0	0	0	0	0	0																	0	0	0	0	0	0																	0	0
1414	F	14	F15d
1415	F	8	F10d
1416	F	14	F15d
1417	F	14	F15d
1418	M	6	F5d
1419	F	8	F10d
1420	M	5	F5d		0	1	0	0	0	0	0	0	0														0	0	0	0	0	0	0	0	0														0
1421	F	5	F5d	1	1			0																		0	0			0																		0	0
1422	M	5	F5d	0	0	0	0	0	0	0																0	0	0	0	0	0	0																0	0
F, female; M, male, F5d, fasting 5±2 days; F10d, fasting 10±2 days; F15d, fasting 15±2 days; F20d, fasting 20±2 days; before, day before starting the fast; day 1-21, fasting day 1-21
[truncated: 42 more columns]

## Sheet: Tabelle2
record_id	cluster	fall_id	pat_id	sex	age	fall	stay	Hypertonika	fasting_days	blood_f_days	headache_pre	headache_F1	headache_F2	headache_F3	headache_F4	headache_F5	headache_F6	headache_F7	headache_F8	headache_F9	headache_F10	headache_F11	headache_F12	headache_F13	headache_F14	headache_F15	headache_F16	headache_F17	headache_F18	headache_F19	headache_F20	headache_F21	headache_F22	headache_F23	headache_F24	headache_F25	headache_F26	headache_F27	headache_F28	headache_F29	headache_F30	headache_F31	headache_F32	headache_F33	headache_F34	headache_F35	headache_F36	headache_F37	headache_F38
2	1	225443	129170	1	57	9	10	0	8	6	1	1	0	0	0	0	0	0	0	0
3	2	226445	106237	1	67	4	15	0	12	11		0	0	0	0	0	0	0	0	0	0	0	0	0
7	1	225951	220541	1	73	3	10	0	7	6	0	0	0	0	0	0	0	0
8	1	225900	182395	1	66	3	10	0	8	6		0	0	0	0	0	0	0	0	0
9	1	224881	189737	1	43	2	10	0	6	5	0	0	0	0	0	0	0
10	1	225903	225902	1	45	1	10	0	7	6	0	1	0	0	0	0	0	0
11	2	223845	178470	1	62	3	14	0	10	9	1	1	0	0	0	0	0	0	0	0	0
12	1	225808	161817	0	50	6	10	0	7	6	0	0	0	0	0	0	0	0
14	2	218449	135846	0	55	9	14	0	11	8
17	1	226299	158475	0	64	2	10	2	9	6				0
18	2	226732	59866	1	74	28	13	0	11	9		0	0	0	0	0	0	0	0	0	0	0	0
19	2	225131	184810	1	66	5	14	0	11	9	0	0	0	0	0	0	0	0	0		0	0	0
20	2	225130	47233	1	69	10	14	1	10	8
22	2	218727	208689	1	51	4	15	0	10	9	0	0	0	0	0	0	0	0	0	0	0
23	2	225359	166640	1	59	4	12	0	9	8	1	1	0	0	0	0	0	0	0	0	0
25	2	223669	193744	0	53	3	14	0	11	8
26	2	223668	193747	1	52	3	14	0	11	8
27	1	224037	186434	1	64	2	10	0	7	6	0	0	0	0	0	0	0	0
28	1	226033	226032	1	71	1	10	0	6	5	0	0	0	0	0	0	0
30	1	227202	227201	0	49	1	11	0	7	5	1	0	0	0	0	0	0	0
32	1	227163	227162	1	57	1	10	1	6	5	1	0	0	0	0	0	1
33	1	224942	173323	0	66	5	10	0	8	5	1	1	1	1	0	1	1
34	1	223747	195052	0	48	2	10	0	7	5	0		1	1	0	0	0	0
46	2	224144	176534	1	68	2	15	1	10	9	0	0	0		0	0	0	0	0	0
47	1	224022	159535	1	57	2	10	0	6	5	1	1	0	0	0	0	0
48	1	224030	224029	0	58	1	10	0	6	5	0	0	0	0	0	0	0
49	3	221388	193792	0	61	2	20	1	16	15	1	1	1	0	0	0	0	0	0	0	0	0	0	0	0	0	0
50	1	224305	224304	1	45	1	10	0	6	4	0	1	1	0	0	1	0
51	2	223873	223872	1	36	1	14	0	9	8	0	0	0	0	0	0	0	0	1	0
52	3	224026	224025	0	67	1	28	1	20	17	0	0	0	0	0	0	0	0	0	0	0	0	0	0	0	0	0	0	0	0	0
53	2	224213	131244	0	52	6	21	0	13	12	0	0	0	0	0	1	1	0	1	1	0	0	0	0
54	2	224005	216910	1	19	2	15	0	11	10		0	0	0	0	0	0	0	0	0	0	0	0
55	2	222409	208529	0	49	2	14	0	11	9
57	2	223691	194856	1	54	2	14	0	12	10	0	1	0	0	0	0	0	0	0	0	0	0	0	0
58	1	224373	193379	1	45	2	12	0	7	6	0	0	0	0	0	0	0	0
60	1	222994	208516	1	46	1	10	0	7	5	0	0	0	0	0	0	0	0
61	1	224406	224404	0	47	1	14	0	10	7	0	0	0	0	0	0	0	0	0	0	0
62	1	224372	194571	1	68	2	12	0	7	6	0	0	0	0	0	0	0	0
63	2	223185	223184	1	36	1	13	0	9	8	1	0	1	0	0	0	0	0	0	0
64	3	224419	224418	1	60	1	21	1	15	14	1	1	0	0	0	0	0	0	0	0	0	0	0	0	0	0
65	3	224282	224281	1	54	1	21	0	15	14	1	0	0	0	0	0	0	0	0	0	0	0	0	0	0	0
67	2	223460	223459	0	31	1	14	0	9	8
68	2	223458	175971	1	70	5	14	1	9	8	0	0	0	0	0	0	0	0	0	0
69	3	223962	223564	1	64	1	26	1	16	15	1	1	1	0	0	1	1	0	0	0	0	0	0	0	0	0	0
70	1	220207	192483	0	53	3	11	0	10	7	1	0	0	0	0	0	0	0	0	0	0
71	4	221093	136472	1	55	11	28	0	20	19	0	1	0	0	0	0	0	0	0	0	0	0	0	0	0	0	0	0	0	0	0
72	2	222453	193486	0	45	2	13	1	10	8	0	0	0	0	0	0	0	0	0	0	0	0
73	2	208273	1340	1	80	34	16	1	12	10	0	0	0	0	0	0	0	0	0	0	0	0	0
74	2	220206	190768	0	59	4	11	0	11	8							0
75	2	224291	224290	0	34	1	12	0	10	9	1	1	1	1	1	1	1	0	1	1	1	1
76	1	224374	224366	0	33	1	10	0	7	5	0	0	0	0	0	0	0	0
77	3	222954	183782	1	61	3	21	0	16	14	1	1	0	0	0	0	0	0	0	0	0	0	0	0	0	0	0
78	3	224640	224639	1	51	1	21	1	16	14	1	1	0	0	0	0	0	0	1	0	0	0	0	0	0	0	0
79	1	224046	224045	1	55	1	10	0	6	5	0	0	1	0	0	0	0
80	1	224044	224043	0	51	1	10	3	6	5	0	0	0	0	0	0	0
81	2	218968	192247	0	91	2	15	0	11	9	0	0	0	0	0	0	0	0	0	0	0	0
82	1	223965	223964	0	46	1	10	0	7	5	0	0	0	0	0	0	0	0
85	1	222852	194356	0	50	2	10	1	9	5		1	1	1	0	0	0	0	0	0
86	2	224774	224773	1	47	1	14	1	10	9
87	3	221101	221100	0	25	1	21	0	16	14	1	0	0	0	0	0	0	0	0	0	0	0	0	0	0	0	0
89	1	223175	194045	0	56	2	10	0	8	7	1	1	0	0	0	0	0	0	0	0
90	2	224042	224041	0	43	1	14	0	9	8	1	0	0	0	0	0	0	0	0	0
91	2	224506	224505	1	25	1	14	0	10	9	1	0	0	0	0	0	0	0	0	0	0
93	3	223888	223887	1	27	1	20	0	15	14	0	1	1	0	0	0	0	0	0	0	0	0	0	0	0	0
95	3	221096	186175	1	64	3	21	0	16	14	0	1	1	0	0	0	0	0	0	0	0	0	0	0	0	0	0
96	3	221097	186172	0	69	3	21	1	16	14	1	1	0	0	0	0	0	0	0	0	0	0	0	0	0	0	0
97	2	223193	111221	0	66	9	14	0	12	9	0	0	1	1	0	0	0	0	0	0	0	0	0	0
98	3	221033	184497	1	68	3	21	0	16	14	0	0	0	0	0	0	0	0	0	0	0	0	0	0	0	0	0
99	3	221099	221098	0	60	1	21	0	16	14	1	1		0	0	0		0	0	0	0	0	0	0	0	0	0
101	2	224197	189410	1	47	1	14	0	9	8	0	1	0	0	0	0	0	0	0	0
102	1	224191	224190	0	42	1	10	0	6	5	0	1	0	0	1	0	0
106	3	224600	208780	1	27	2	21	0	15	14	1	1	0	0	0	0	0	0	0	0	0	0	0	0	0	0
107	3	224740	224739	1	38	1	21	0	16	14	0	0	0	0	0	0	0	0	0	0	0	0	0	0	0	0	0
108	2	224726	224725	0	44	1	15	0	10	8	0	0	0	0	0	0	0	0	0	0	0
109	1	224683	224682	0	51	1	10	0	6	5	0	0	0	0	0	0	0
110	2	224809	164079	0	57	5	14	0	10	8
112	1	224561	208103	1	72	2	10	1	6	5	0	0	0	0	0	0	0
113	1	224559	189650	1	59	3	10	0	6	5	0	0	0	0	0	0	0
114	1	224889	139054	0	51	7	12	0	8	6
115	3	222699	158204	0	52	8	21	0	16	13
116	2	224274	178194	1	48	4	15	0	14	9	1	1	0	0	0	0	0	0	0	0	0	0	0	0
118	2	224594	224593	1	78	1	14	2	9	8	0	1	0	0	0	0	0	0	0	0
119	4	224893	224892	1	56	1	28	0	23	18	0	1	0	0	0	0	0	0	0	0	0	0	0	0	0	0	0	0	0	0	0	0	0	0
120	2	224767	221559	1	29	2	17	0	12	10
121	1	224720	224719	0	42	1	10	0	6	5	0	0	0	1	0	0	0
122	1	224715	221231	0	44	2	10	0	6	4	0	0	0	0	0	0	0
124	2	224336	224335	1	56	1	14	0	10	8	1	1	1	0	0	0	0	0	0	0	0
125	2	224642	157045	0	78	10	15	1	11	10	0	0	0	0	0	0	0	0	0	0	0	0
126	3	223181	218704	0	68	2	21	0	16	14	0	0	0	0	0	0	0	0	0	0	0	0	0	0	0	0	0
129	2	224166	210332	1	77	1	14	0	10	8	1	0	0	0	0	0	0	0	0	0	0
130	1	225070	165766	1	56	4	10	0	7	5
131	1	222193	174970	1	62	4	10	0	6	5	0	0	0	0	0	0	0
133	1	223354	223353	0	58	1	10	0	7	5	1	1	0	0	0	0	0	0
134	2	224890	4792	0	80	19	42	2	17	8	0	0	0	0	0	0	0	0	0	0	0	0	0	0	0	0	0	0
135	1	223348	184150	1	68	2	10	2	8	6		0	1	0	0	0	0	0	0
136	3	222281	193040	1	55	3	20	0	15	13	0	0	0	0	0	1	0	0	0	0	0	0	0	0	0	0
138	2	224668	223409	0	48	2	14	0	9	8	0	1	1	1	1	1	0	0	1	1
140	1	223713	130701	1	48	6	13	0	10	7	0	1	1	0	0	0	0	0	0	0	0
141	2	223406	217739	0	83	2	14	1	12	9	1	1	0	0	0	0	0	0	1	0	0	0	0	0
142	2	223416	217737	1	69	2	14	0	12	9	0	0	0	0	0	0	0	0	0	0	0	0		0
143	1	224717	224716	1	50	1	10	0	8	6		1	1	1	0	0	0	0	0
144	2	224655	224654	1	47	1	14	0	10	9
146	2	221701	167632	1	56	4	14	1	11	9	0	1	0	0	0	0	0	0	0	0	0	0	0
147	3	222280	193037	1	76	3	20	0	15	13	0	0	0	0	0	0	0	0	0	0	0	0	0	0	0	0
149	3	223688	194080	0	60	3	21	2	16	13	0	0	0	0	0	0	0	0	0	0	0	0	0	0	0	0	0
150	1	222086	222085	1	55	1	10	0	6	5	1	0	1	1	0	0	0
151	1	225050	180585	1	21	3	16	0	7	6
152	1	222088	222087	1	65	1	10	0	6	5	0	1	1	1	1	1	1
153	3	224986	224985	0	51	1	21	0	16	14	1	1	1	1	1	0	1	0	0	0	0	1	1	1	1	1	1
154	1	223767	174634	1	59	4	10	0	9	6		0	0	0	0	0	0	0	0	0
155	1	224919	224918	0	71	1	11	1	8	7	1	1	1	0	1	0	0	0	0
158	1	223526	155058	1	64	10	12	0	9	7	0	0	0	0	0	0	0	0	0	0	0
159	1	224188	194984	0	46	2	10	0	10	6	0	1	1	1	1	0	0	0	0	0	0
160	1	223929	223928	0	59	1	10	0	6	5	0	1	0	0	0	1	1
161	1	223927	223926	1	59	1	10	0	6	5	0	1	1	0	0	0	1
162	2	224177	215215	1	51	1	14	0	11	9	1	1	1	1	1	1	1	1	0	0	0	0	0
163	1	224745	224744	0	28	1	10	0	6	5	0	0	0	0	0	0	0
164	1	220068	220067	0	50	1	12	0	8	7	1	0	0	0	0	0	0	0	0
165	1	224742	18606	1	59	26	10	0	7	5	0	1	0	0	0	0	0	0
166	1	224743	96844	0	33	4	10	0	6	4	0	0	0	0	0	0	0
167	1	225031	96846	1	30	8	10	0	7	5	0	1	0	0	1	0	0	0
168	1	222394	222393	0	59	1	12	0	9	7
169	1	223293	223292	1	66	1	10	0	6	5	1	1	0	0	0	0	0
170	1	220063	208209	0	64	2	13	2	9	7	0	0	0	0	0	0	0	0	0	0
172	1	220066	220065	0	55	1	12	0	8	7
174	3	223325	223324	0	46	1	21	1	16	14	0	0	0	0	0	0	0	0	0	0	0	0	0	0	0	0	0
175	1	224276	224275	1	48	1	10	0	6	4	0	1	0	1	1	0	0
176	1	223342	151407	1	67	5	11	0	8	7	0	1	1	0	0	0	0	0	0	0
177	1	225393	225392	1	26	1	10	0	7	5	0	1	1	0	0	0	0	0
178	3	220102	220101	1	66	1	26	0	16	14	0	1	0	1	1	0	0	0	0	0	0	0	0	0	0	0	0
180	1	224941	224940	0	49	1	10	0	7	5	0	0	0	1	1	1	1	0
181	1	224525	127183	1	62	10	10	0	7	5	0	0	0	0	0	0	0	0
182	3	222952	111137	0	73	3	20	1	15	14
184	2	224757	171112	1	38	2	16	0	13	10	0	0	0	0	0	0	0	0	0	0	0	0	0	0	0
185	3	225021	120894	1	49	2	21	0	22	14		0	1	0	0	0	0	0	0	0	0	0	0	0	0	0	0	0	0	0	0	0	0
186	2	224664	172381	0	60	8	11	1	9	8	0	0	0	0	0	0	0	0	0	0	0
187	2	224665	172384	1	60	8	11	0	9	8	0	1	0	0	0	0	0	0
190	1	224073	123361	0	53	7	10	0	8	6	0	0	1	0	0	0	0	0	0	0
191	1	225200	225199	0	59	1	10	0	6	5	1	1	0	0	0	0	1
192	1	225248	225247	1	36	1	11	0	9	6	1	1	1	0	0	0	0	0	0	0
193	3	222987	217676	1	52	3	18	0	14	13	0	0	0	0	0	0	0	0	0	0	0	0	0	0	0	0
194	2	224308	141754	1	44	5	15	0	12	11	1	1	1	1	0	0	0	0	0	0	0	0	0	0
195	2	224427	136836	1	51	6	14	0	13	11	0	1	0	0	0	0	0	0	0	0	0	0	0	0
199	2	224564	116557	1	56	10	14	0	11	10	1	1	0	0	0	0	0	0	0	0	0	0	0
200	4	225507	225506	0	50	1	35	0	26	21	1	0	0	0	0	0	0	0	0	0	0	0	0	0	0	0	0	0	0	0	0	0	0	0	0	0	0
201	3	224586	224585	1	73	1	23	1	15	14	0	0	0	0	0	0	0	0	0	0	0	0	0	0	0	0
203	1	224378	224377	0	54	1	10	0	6	5	1	1	1	0	0	0	0
204	1	225523	225522	1	35	1	10	0	9	6	0	0	0	0	0	0	0	0	0	0
206	1	225127	143952	0	60	2	10	1	7	5	0	1	1	1	0	0	0	0
208	3	224301	224300	0	49	1	21	2	16	14	0	0	0	0	0	0	0	0	0	0	0	0	0	0	0	0	0
210	2	225497	152446	1	74	7	14	2	12	10	0	0	0	0	0	0	0	0	0	0	0	0	0	0
211	4	223524	223523	1	59	2	28	2	23	21	1	0	0	0	0	0	0	0	0	0	0	0	0	0	0	0	0	0	0	0	0	0	0	0
213	2	225103	225102	0	61	1	14	1	10	8	0	0	0	0	0	0	0	0	0	0	0
216	1	189087	169396	0	58	5	12	1	8	7	1	1	0	0	0	0	0	0	0
217	1	220976	220975	1	58	1	10	0	8	6	0	0	0	0	0	0	0	0	0	0
218	1	220978	220977	0	62	1	10	0	8	6	0	0	1	0	0	0	0	0	0	0
219	1	224169	224168	1	40	1	11	0	8	5	1	1	0	0	1	0	0	0	0
223	3	223299	123613	1	63	5	21	0	16	14	0	0	0	0	0	0	0	0	0	1	0	0	0	0	0	0	0
224	1	224563	224562	1	47	1	10	0	6	5	0	1	1	0	0	0	0
225	1	224644	224643	1	60	1	10	0	6	5	1	0	1	0	0	0	0
226	1	224917	104379	1	60	3	10	0	6	4	0	1	1	0	0	0	0
227	2	225399	1871	1	59	29	12	0	10	9	1	1	0	0	0	0	0	0	0	0	0	0
228	4	225445	182755	1	56	5	21	0	19	18	1	0	0	0	0	0	0	0	0	0	0	0	0	0	0	0	0	0	0	0
229	3	218447	165554	0	60	6	21	1	16	14	0	0	0	0	0	0	0	0	0	0	0	0	0	0	0	0	1
230	3	218448	165550	1	59	6	21	0	16	14	0	1	1	0	0	0	0	0	1	1	1	0	0	0	0	0	0
231	3	224970	224969	1	53	1	21	0	16	14	1	1	0	0	0	0	0	0	0	0	0	0	0	0	0	0	0
232	1	223012	222261	1	58	2	10	1	6	5	1	0	0	0	0	0	0
233	1	224319	224318	1	51	1	10	0	9	6	1	1	1	1	0	0	0	1	0	0	0
234	2	224472	122313	0	80	3	14	0	11	9	0	0	0	0	0	0	0	0	0	0	0	0	0
237	2	224039	184321	1	53	3	14	0	11	9	0	1	0	0	0	0	0	0	0	0	0	0	0
238	2	224867	187333	0	57	2	14	1	10	8	0	0	0	0	0	0	0	0	0	0	0
239	1	225456	225405	1	58	1	14	2	7	6	1	1	1	0	0	0	0	0
240	2	225767	186475	1	46	3	14	0	9	8	0	1	1	1	0	0	0	0	0	0
241	3	225788	217142	1	46	2	21	0	15	14	1	0	1	1	0	0	0	0	0	0	0	0	0	0	0	0
242	1	216862	20524	0	76	25	13	1	9	7	0	0	0	0	0	0	0	0	0	0
244	2	221550	221548	1	52	1	14	0	9	9	0	0	0	0	0	0	0	0	0	0
245	1	221848	221847	1	60	1	10	0	5	4	0	1	0	0	0	0
246	2	222282	134113	1	56	6	14	0	9	8	0	0	0	0	0	0	0	0	0	0
247	2	222284	222283	1	22	1	14	0	9	8	1	0	0	0	0	0	0	0	0	0
248	3	223988	223987	1	60	1	21	0	15	14	0	0	0	0	0	0	0	0	0	0	0	0	0	0	0	0
249	3	223991	223989	0	69	1	21	1	13	14	1	0	0	0	0	0	0	0	0	0	0	0	0	0
250	1	224732	221785	0	62	2	10	2	6	4	0	0	0	0	0	0	0
251	1	224804	224803	0	44	1	10	0	7	4	0	0	0	0	0	0	0	0
252	1	225099	153613	1	53	3	11	0	8	6	1	1	0	0	0	0	0	0	0
253	1	225571	221368	0	50	2	14	0	9	7	0	0	0	0	0	0	0	0	0	0
254	1	224795	218844	1	76	2	10	0	6	5	0	1	0	0	1	0	1
255	1	225017	225016	1	48	1	10	0	6	5	0	0	0	0	0	0	0
256	4	225326	225325	0	67	1	27	1	21	19	0	0	0	0	0	0	0	0	0	0	0	0	0	0	0	0	0	0	0	0	0	0
257	1	223323	102188	1	67	27	11	1	9	7
260	1	225267	225266	0	30	1	11	0	7	6	0	1	1	1	0	1	0	0
261	1	225269	225268	1	27	1	11	0	7	6	1	1	0	1	0	0	0	0
262	1	225574	225573	1	44	1	10	0	9	6
264	2	224584	105374	1	63	43	16	0	10	9	0	0	0	0	0	0	0	0	0	0	0
265	1	224814	224813	0	50	1	10	0	7	5	0	0	0	0	0	0	0	0
266	1	224816	224815	1	51	1	10	0	7	5	0	0	0	1	0	1	0	0
267	1	224884	186552	0	59	2	10	0	6	5	0	0	0	0	0	0	0
269	2	225563	184480	0	50	3	14	0	13	9		0	0	0	0	0	0	0	0	0	0	0	0	0
270	2	225878	158930	1	40	3	17	0	13	12	0	0	0	0	0	0	0	0	0	0	0	0	0	0
272	4	225029	225026	0	68	1	28	3	23	21	0	0	0	0	0	0	0	1	0	0	0	0	0	0	0	0	0	1	0	0	0	0	0	0
278	2	225748	225746	0	56	1	14	0	11	10
279	1	225761	180740	1	62	3	10	0	8	5	1	1	0	0	0	0	0	0	0	0
280	3	223316	102141	1	40	4	17	0	14	13	1	1	0	0	0	0	0	0	0	0	0	0	0	0	0
281	1	223753	161226	1	55	4	10	0	11	6		0	0	1	1	0	0	0	0	0	0	0
283	1	225558	156213	0	75	7	11	2	8	6	0	0	0	0	0	0	0	0	0
285	2	221727	221726	1	66	1	14	0	9	8	1	0	0	0	0	0	1	0	0	0
286	2	223229	130604	1	58	16	13	0	10	8				0
287	2	223230	130584	1	58	18	13	0	10	8	1	1	0	0	0	1	1	1	0	0	0
289	1	223493	161522	0	62	12	12	0	10	7	0	0	0	0	0	0	0	0	0	0	0
290	3	223529	223528	1	68	1	20	0	14	13
291	2	223731	175726	1	45	2	14	0	12	9	0	0	1	0	0	0	0	0	0	0	0	0	0	0
292	2	224070	149923	1	62	7	14	0	12	10
293	3	224196	224194	1	55	1	21	0	18	14	1	0	1	0	1	0	1	1	1	1	0	0	0	0	0	1	0	0	0
294	3	224395	224394	1	66	1	21	0	17	14	1	1	1	0	0	0	0	0	1	0	1	0	0	0	0	0	0	1
295	3	224397	224396	0	80	1	21	1	15	14	0	0	0	0	0	0	0	0	0	0	0	0	0	0	0	0
297	2	225676	165448	1	51	9	13	0	11	9	0	0	0	0	0	0	0	0	0	0	0	0	0
299	2	225838	66904	0	52	5	14	0	12	8	0	0	0	0	0	0	0	0	0	0	0	0
300	2	226006	226005	1	57	1	15	0	11	9	1	1	0	0	0	0	0	0	0	0	0	0
302	1	224251	224250	0	56	1	12	0	8	7	0	0	0	0	0	0	0	0	0
303	4	224988	224987	1	52	1	28	2	22	21	0	0	0	0	0	0	0	0	0	1	1	0	1	1	1	1	0	0	0	0	0	0	0
304	1	225228	225227	1	42	1	12	0	8	7	0	0	0	0	0	0	0	0	0
306	3	222718	106726	1	58	3	22	2	18	15	0	0	0	0	0	0	0	0	0	0	0	0	0	0	0	0	0	0	0
307	3	225049	225048	0	46	1	21	0	17	14	1	0	0	0	0	0	0	0	0	0	0	0	0	0	0	0	0	0
308	1	225700	180743	0	60	2	10	0	8	5	0	0	0	0	0	0	0	0	0	0
309	1	224951	18274	0	82	2	10	0	7	5	1	0	0	1	0	0	0	0
310	2	225452	173482	0	60	2	15	0	12	10	0	0	0	0	0	0	0	0	0	1	0	0	0
313	2	225745	158083	1	46	3	17	0	13	11	0	0	1	0	0	0	0	1	0	0	0	0	0	0	0
314	2	225760	166491	0	49	3	17	0	13	11	0	0	0	0	0	0	0	0	0	0	0	0	0	0	0
315	2	226225	223464	0	66	2	15	0	13	12	0	0	0	0	0	0	0	0	0	0	0	0	0	0	0
316	2	222512	184752	0	63	4	14	0	11	10	1	1	0	0	1	0	0	0	0	0	0	0	0
317	2	222530	184756	1	72	4	14	0	11	10	0	1	0	0	0	0	0	0	0	0	0	0	0
318	1	223756	172312	1	65	9	10	0	8	6	0	0	1	0	0	0	0	0	0	0
320	1	224174	224116	0	77	1	10	0	8	6	0		0		0		0		0
321	1	224176	224175	0	51	1	10	0	6	4
322	2	224417	223091	0	64	1	16	3	12	9							0	0	0	0	0	0	0
323	1	224622	224621	0	46	1	10	0	7	5	1	0	0	0	0	0	0	0
324	2	224841	224840	1	31	1	14	0	11	10	1	1	1	0	0	0	0	0	0	0	0	0	0
327	2	225883	225882	1	70	1	17	0	12	10													0
329	1	226154	157601	0	57	8	11	1	8	6	1	1	1	1	0	0	0	0	0
330	2	223243	131587	0	63	9	14	0	12	8	0	0	0	0	0	0	0	0	0	0	0	0	0	0
331	2	224539	104289	0	52	13	16	0	13	11	0	1	1	0	0	0	0	0	0	1	0	0	0	0	0
332	1	224712	224711	0	43	1	10	0	9	5	1	1	0	1	0	0	0	0	0	0
333	1	224714	224713	1	39	1	10	0	9	5	1	0	0	0	0	0	0	0	0	0
334	1	224730	153407	0	65	6	10	1	7	5	0	1		0	0	0	0	0
338	1	223786	223785	1	47	1	10	0	6	5	1	0	1	0	0	0	0
339	1	223788	223787	0	44	1	10	0	6	5	0	0	0	0	0	0	0
340	1	225047	191914	1	37	2	10	0	8	6	0	0	1	1	0	0	0	0	0	0
342	2	217630	217256	1	60	2	14	0	10	8	1	1	1	1	0	1	0	1	1	1	0
343	1	224433	97335	0	88	20	10	0	9	5
345	2	224848	140947	0	71	3	13	1	10	9
346	2	224849	208451	0	51	2	13	0	10	9	1	0	0	0	0	0	0	0	0	0	0	0
347	1	224861	186582	0	53	2	10	0	6	5	1	0	0	0	0	0	0
348	1	224916	224915	1	42	1	10	0	6	5	1	1	1	0	1	0	0
349	2	225314	181222	1	44	4	14	0	14	9	0	1	0	0	0	0	0	0	0	0	0	0	0	0	0
352	2	222945	221406	1	57	2	11	0	11	9	0	1	0	0	0	0	0	0	0	0	0	0
353	4	223412	223411	0	53	1	27	1	22	21	0	0	0	0	0	0	0	0	0	0	0	0	0	0	0	0	0	0	0	0	0	0	0
355	1	224751	153980	0	79	15	10	1	7	6	1	1	1	1	0	0	0	0
356	2	225556	225555	0	50	1	14	0	9	8	1	1	1	0	1	1	1	0	1	1
357	2	225561	225560	1	48	1	14	0	9	8	1	1	1	1	1	1	0	0	1	0
359	2	225910	167996	1	60	2	16	1	13	12	0	1	0	0	0	0	0	0	0	0	0	0	0	0
360	3	226159	223696	1	55	1	20	0	17	16	0	0	0	0	0	1	0	0	0	0	0	0	0	0	0	1	0	0	0
362	1	224835	133323	1	45	3	10	0	9	5	0	0	1	1	0	0	0	0	0	0
368	3	224542	178596	1	63	5	18	0	15	14		0	0	0	0	0	0	0	0	0	0	0	0	0	0	0
369	2	224826	219960	1	69	1	14	0	12	9	1	1	0	0	0	0	0	0	0	1	0	0	0	0
370	2	224831	224829	1	35	1	14	0	13	9	1	1	0	0	0	0	0	0	0	0	0	0	0	0
371	3	225018	218384	0	61	2	21	0	15	14	0	1	0	0	0	0	0	0	0	0	0	0	0	0	0	0
373	2	225963	225962	1	71	1	14	2	10	8	0	0	0	0	0	0	0	0	0	0	0
374	3	226560	226557	1	68	1	21	0	17	16	1	1	0	0	0	1	0	0	0	0	0	0	0	0	0	0	0	0
375	3	217036	4552	1	68	25	21	0	15	14	0	1	0	0	0	0	0	0	0	0	0	0	0	0	0	0	0
376	2	222813	163462	1	61	5	15	0	10	9	0	1	1	0	0	0	0	0	0	0	0
378	2	225690	225689	1	59	1	14	1	10	8	0	0	0	0	0	0	0	0	0	0	0
379	2	225692	225691	0	63	1	14	0	10	8	0	0	0	0	0	0	0	0	0	0	0
380	2	225978	185336	0	61	3	14	0	11	8	1	0	0	0	0	0	0	0	0	0	0	0
381	1	225987	179925	1	40	6	10	0	7	6	1	0	1	0	0	0	0	0
382	1	226662	226492	0	54	1	10	0	9	5			0	0	0	1	0	0	0	0
383	2	217635	208328	0	75	2	13	0	9	8	0	0	0	0	0	0	0	0	0	0
384	2	218051	218049	1	75	1	13	0	9	8	1	0	0	0	0	0	0	0	0	0
385	1	222695	122908	1	61	8	10	2	7	6	0	0	0	0	0	0	0	0
389	3	225055	225054	0	53	1	19	1	15	13	0	0	0	0	0	0	0	0	0	0	0	0	0	0	0	0
391	2	225230	225229	0	77	1	14	0	9	8	0	0	0	0	0	0	0	0	0	0
392	2	225232	225231	1	74	1	14	1	9	8	0	0	0	0	0	0	0	0	0	0
393	3	225540	195034	0	61	2	21	0	16	14	1	0	0	0	0	0	0	0	0	0	0	0	0	0	0	0	0
396	3	223022	223021	1	73	1	21	2	17	14	0	0	0	0	0	0	0	0	0	0	0	0	0	0	0	0	0	0
397	3	223024	223023	0	59	1	21	0	17	14	0	0	0	0	0	0	0	0	0	0	0	0	0	0	0	0	0	0
398	2	225327	177314	1	60	3	14	0	10	8	1	1	1	1	0	0	0	0	0	0	0
399	2	225328	185513	0	67	2	14	0	10	8	0	1	1	1	0	0	1	0	0	0	0
400	1	225462	225461	0	28	1	10	0	7	6	0	1	0	0	0	0	0	0
401	1	225464	225463	0	29	1	10	0	7	6	0	0	0	1	0	0	0	0
402	1	225209	19048	1	77	18	11	0	8	6	0	1	0	0	0	0	0	0	0	0
403	1	223241	183767	1	71	3	10	1	6	5
404	3	226505	226503	0	54	1	21	0	17	14	0	1	1	0	0	0	0	0	0	0		0	0	0	0	0	0	0	0
405	3	225217	52038	1	68	5	19	0	16	14	0	0	1	0	0	0	0	0	0	0	0	0	0	0	0	0	0
406	2	224635	107160	0	63	13	12	0	9	8	0	0	0	0	0	0	0	0	0	0	0
408	1	225437	151384	0	54	2	10	0	10	6	0	0	0	0	0	0	0	0	0	0
409	1	225436	127228	0	53	4	10	0	10	6	1	1	0	1	0	0	0	0	0	0
410	1	223986	223985	1	50	1	10	0	6	5	1	1	0	0	0	0	0
411	1	223984	223983	0	52	1	10	2	6	5	1	1	0	0	0	0
412	3	226632	226631	0	40	1	16	2	15	13	0	0	0	0	0	0	0		0	0	0	0	0	0	0	0	0
414	2	224906	188258	1	59	5	18	1	14	12	1	1	0	1	1	0	0	0	0	0	0	0	0	0	0
416	2	226141	174441	0	45	2	10	0	10	8	1	1	1	0	0	0	0	0	0	0
417	2	222803	132101	0	62	6	15	0	11	10	0	0	0	0	0	0	0	0	0	0	0	0
419	1	226454	226453	1	75	1	10	0	8	5
420	2	223190	163312	1	28	3	14	0	10	9	1	1	1	0	0	0	0	0	0	0	0	0
422	1	194235	168071	1	57	5	10	0	8	5		0	0		0	0	0	0	0
423	1	226327	226326	0	71	1	10	2	6	5			0
424	1	225653	225652	1	64	1	10	0	7	5	0	0	0	0	0	0	0
425	1	225822	225821	1	65	1	10	0	6	4	0	1	0	0	0	0	0
427	2	226878	226877	0	42	1	13	0	10	8	0	1		0	0	0	0	0	0	0	0
428	2	221743	18528	1	59	9	13	0	11	9	0	1	1	0	0	0	0	0	0	0	0	0	0
429	2	225912	159967	0	74	6	13	0	9	8	0	0	0	0	0	0	0	0	0	0
431	2	225503	225502	0	56	1	14	1	9	8	0	0	0	0	0	0	0	0	0	0
432	2	225060	225059	0	66	1	14	0	9	8	0	0		0		0		0	0	0
433	3	222717	222716	0	61	1	21	0	16	14	0	0	0	1	1	0	0	0	0	0	0	0	0	0	0	0	0
435	2	225062	225061	1	60	1	14	0	9	8	1	0	0	0	0	0	0	0	0
436	1	225792	117716	0	82	6	11	2	7	7	0	0	0	0	0	0	0	0
437	1	225794	117723	1	72	6	11	1	8	7			0		0	0	0	0
438	2	223639	56462	1	65	13	14	0	9	8	0	0	0	0	0	0	0	0	0	0
439	1	224498	111569	1	66	13	15	0	7	5	0	0	0	0	0	0	0	0
441	1	224866	224865	0	51	1	10	0	6	5	1	1	1	1	0	1	1
442	1	225855	225854	0	65	1	10	2	6	5	1	1	0	0	0	0	0
443	1	224864	224863	1	50	1	10	0	6	5	0	0	0	0	0	0	0
444	2	226443	122938	1	64	8	12	0	9	8	0	0	0	0	0
445	2	224700	27863	0	72	10	12	1	10	8		0	0	0	0	0		0	0	0	0
446	1	224818	224817	0	43	1	10	0	7	5	0	0	1	0	0	0	0	0
447	1	227097	226934	0	45	1	16	0	10	7
448	1	225673	225672	1	44	1	14	0	10	7	1	1	1	1	0				0	0	0
449	1	226853	220967	1	44	1	16	0	10	7
450	1	225671	223738	1	44	1	14	0	9	7	0	0	0	0	0	0	0		0
451	1	224625	224624	1	60	1	10	0	7	5	1	1	0	0	0	0	0	0
453	2	225918	225916	1	60	1	21	0	16	12	1	0	0	0	0	0	0	0	0	0	0	0	0	0	0	0	0
455	1	226923	226922	0	72	1	10	0	7	5	0	0	0	0	0	0	0	0
456	2	226446	221827	1	41	2	14	0	12	10	0	0	0	0	0	0	0	0	0	0	0	0	0	0
458	2	226213	226211	1	84	1	14	0	10	9	0	0	0	0	0	0	0	0	0	0	0	0
461	2	225940	225939	1	30	1	14	0	11	8	0	0	0	0	0	0	0	0	0	0	0	0
462	2	226691	226690	0	68	1	13	0	10	8	1	1	1	0	0	0	0	0	0	0	0
465	1	226607	226607	1	27	4	10	0	7	5		1	0	0	0	0	0	0
466	1	226856	124898	1	25	5	10	0	6	4	0	1	0	0	0	0	0
467	1	226576	162067	0	79	5	10	0	7	5	1	1	0	0	0	0	0
468	1	226449	31911	1	70	12	12	0	10	7	0	0	0	0	0	0	0	0	0	0	0	0
469	2	224515	58269	1	62	3	13	0	9	8	1	0	0	0	0	0	0	0	0	0
470	1	224500	144812	0	68	6	13	1	9	7	0	0	0	0	0	0	0	0	0	0
473	1	224553	57203	1	62	15	10	0	9	6	0	0	0	0	0	0	0	0	0	0	0
474	1	226208	226207	1	56	1	10	0	7	5	1	1	1	1	1	1	0	0
475	1	225828	172728	1	53	4	10	0	7	5	1	0	0	1	0	0	0	0
477	1	225981	181027	1	59	2	10	0	7	5	1	1	0	0	1	0	0	1
478	1	226791	226790	1	52	1	14	0	9	7	0	1	1	1	0	0	0	0	0	0
479	2	224015	208254	1	74	2	14	0	9	8	1	1	1	1	1	1	1	1	0	0
480	2	224017	224016	0	77	1	14	2	9	8	0	0	0	0	0	0	0	0	0	0
481	1	226759	226758	1	56	1	14	0	9	7	0	1	0	1	0	0	0	0	0	0
482	2	226364	106848	0	61	5	15	0	12	8
483	1	226525	226524	0	36	1	10	0	6	5	1	0	0	0	0	0	0
484	1	226523	226522	0	37	1	10	0	6	5	1	0	0	0	0	0	0
485	1	226584	226583	1	76	1	10	1	7	5
486	2	224330	224329	1	63	1	14	0	9	8	0	0	0	0	0	0	0		0
489	2	225204	225203	1	54	1	14	0	9	8	0	1	1	1	1	0	0	0	0	0
490	2	189277	3352	0	79	23	17	0	12	11	0	0	0	0	0	0	0	0	0	0	0	0	0
491	1	223930	176245	0	52	3	10	1	9	6	0	0	0	0	1	1	0	0	0	0	0
492	1	224729	208140	1	55	2	10	0	7	4	1	0	0	0	0	0	0	0
494	2	225246	225245	1	51	1	14	0	10	8	0	0	0	0	0	0	0	0	0	0	0
495	1	226234	153067	0	60	11	10	1	8	6		1	0	1	0	0	0	0
496	1	225880	225879	1	34	1	10	0	7	5	1	0	0	0	0	0	0	0
497	1	223701	148046	1	61	3	10	0	7	5	0	1	0		0	0	0	0
498	1	224675	224674	0	48	1	10	0	8	6	0	1	0	0	0	0	0	0	0	0
499	1	226331	226330	1	56	1	10	1	7	5	1	1	0	0	0	1	0	0
500	2	224599	219916	1	63	2	14	0	10	8	0	0	0	0	0	1	0	0	0	0	0
501	2	224598	219914	0	62	2	14	0	10	8	1	1	1		1	0	0	0	0	0	0
502	1	226907	226906	1	54	1	10	0	6	5	1	0	0	0	0	0	0
503	2	224708	224707	0	58	1	14	1	11	8		1	1	0	0	0	0	0	0	0	0	0
504	3	225398	225397	0	75	1	21	0	15	14	1	1	0	0	1	0	0	0	1	0	0		0	0	0	0
505	2	226689	217297	1	67	3	15	0	13	10	0	0	0	0	0	0	0	0	0	0	0	0	0	0	0
506	3	222465	193801	1	49	3	20	0	18	16	1	1	1	0	0	0	1	0	0	0	0	0	0	0	1	0	0	1	0	0
508	2	225145	176582	1	48	4	10	0	9	8	0	1	1	0	0	0	0	0	0	0	0
509	1	225147	225146	0	40	1	10	1	7	5	0	0	0	0	0	0	0	0
510	1	225511	219414	1	85	3	10	0	7	4
511	1	224220	224219	0	58	1	10	0	7	5	0	0	0	0	0	0	0	0
512	1	227432	227431	1	53	1	10	0	6	4	1	1	1	1	1	1	1
513	1	227444	227443	1	28	1	10	0	6	4	1	0	1	1	0	0	0
514	1	224722	105772	1	76	8	10	0	8	5	0	0	0	1	1	0	0	0	0	0
515	2	227463	194147	1	52	2	14	2	10	8	1	1	0	0	0	0	0	0	0	0	0
518	1	226476	226474	0	74	1	14	0	10	7	0	0	0	0	0	0	0	1		0	0
520	1	224143	224142	0	73	1	10	0	7	5	0	0	0	0	0	0	0	0
521	2	224098	164192	0	80	3	10	1	9	8		0	0		0	0	0		0	0
522	2	224099	159425	1	77	5	10	0	9	8		0	1	0	1	0	0	0	0	0
523	1	226873	146776	1	53	6	10	0	7	5	1	0	0	0	0	0	0	0
524	2	226872	146773	0	56	7	14	1	9	8	0	0	0	0	0	0	0	0	0	0
525	1	224952	174823	0	40	5	10	0	9	7	0	0	0	0	0	0	0		0	0
526	1	225928	225927	0	64	1	11	1	8	6
528	1	226530	173165	0	56	4	10	1	10	6	1	1	0	0	0	0	0	0	0	0
529	1	225772	170718	0	25	7	10	0	8	5
530	2	224474	224473	1	60	1	17	0	12	11	1	0	1	1	0	1	0	0	0	0	0	0	0
531	1	226534	226531	0	33	1	10	0	8	6	0	1	0	0	0	0	0	0
532	1	195148	150630	1	52	9	11	0	8	7		1	1	1
533	1	225370	225369	0	58	1	10	0	6	5	0	0	0	0	0	1	0
534	1	226174	226173	1	59	1	11	0	9	6	1	1	1	1	0	0	1	0	0	0
535	1	224669	221845	1	59	2	11	0	9	6	1	1	0	0	0	0	0	0	0	0
536	4	218648	188236	0	66	4	23	1	21	18			0	1	1	0	0	0	0	0	0		0	0			0	0	0	0	0	0	0
537	1	225469	225468	1	48	1	10	0	7	5	0	1	1	0	0	0	0	0
538	1	225467	183429	0	52	2	10	0	7	5	1	0	0	0	0	0	0
540	2	223604	114340	1	68	3	14	2	9	8
542	2	224221	185706	1	57	2	14	0	10	8	1	1	0	0	0	0	0	0	0	0	0
543	2	224869	224868	1	49	1	14	0	9	8	0	1	0	0	0	0	0	0	0	0
545	2	223011	181252	0	52	6	14	0	10	9	1	1	0	0	0	0	0	0	0	0	0
547	2	224979	224977	0	50	1	14	0	10	8
548	2	223615	125672	1	71	9	14	3	9	8	0	0	0	0	0	0	0	0	0	0
549	2	224198	216828	0	49	3	14	0	12	8
550	2	224723	223000	1	58	2	15	0	11	9	0	0	0	0	0	0	0	0	0	0	0	0
551	2	224034	169684	0	71	4	14	1	9	8	0	0	0	0	0	0	0	0	0	0
552	1	224105	178635	1	32	4	12	0	8	6
553	2	224697	218125	1	54	3	14	1	12	8
556	2	225356	175644	0	58	6	14	0	10	9
562	1	227641	227640	1	36	1	10	0	6	5	1	0	0	0	0	0	0
563	1	223440	23347	1	69	9	11	2	9	7	0	0	1	0	0	1	0	0	0	0	0
564	2	225971	135116	0	79	4	12	1	9	8	0	0	0	0	0	0	0	0	0	0	0
565	1	219060	216972	1	57	2	10	0	9	6	0	0	1	0	0	0	0	0	0	0	0
566	2	220016	94899	1	72	16	14	0	12	10
567	2	224121	115528	0	67	16	14	1	10	9	1	0	0	0	0	0	0	0	0	0	0	0
568	1	227270	220009	0	51	3	10	1	9	7	0	1	0	0	0	0	0	0	0	0
571	1	223923	167020	0	41	4	10	0	7	5	1	0	0	0	0	0	0	0
572	1	225207	128714	1	70	6	10	0	9	6	0	0	0	1	0	0	0	0	0	0
573	1	224591	224590	1	60	1	10	0	6	5	1	0	0	0	0	0	0
574	1	227060	227059	1	47	1	10	0	6	5	1	1	0	1	0	0	0
578	3	224550	224549	0	63	1	23	0	18	16	0	0	0	0	0	0	0	0	0	0	0	0	0	0		0	0	0	0
580	1	223256	192480	1	66	2	10	1	6	5	0	0	0	0	0	0	0
581	1	223258	223257	1	34	1	10	0	6	5	0	0	0	0	0	0	0
582	1	227566	152467	1	55	12	12	0	8	7
584	1	225107	225106	1	59	1	10	0	6	5	1	1	1	0	0	0	0
585	1	225105	225104	0	64	1	10	1	6	5	0	1	1	0	0	0	0
586	1	226712	226711	1	54	1	10	0	7	6	1	0	0	0	0	0	0	0
587	3	223199	158011	0	54	10	21	1	14	13	0	0	0	0	0	0	0	0	0	0	0	0	0	0	0
589	4	221790	181525	1	67	4	27	0	22	20	0	0	0	0	0	0	0		0	0	0
592	2	223291	178765	1	52	3	14	0	10	8	0	0	0	0	0	0	0	0	0	0	0
593	2	184990	111631	1	74	12	15	0	12	11	0	0	0	0	0	0	0	0	0	0	0	0	0	0
595	2	224937	184144	1	60	2	13	0	8	8	0	0	0	0		0			0
596	2	224672	194489	1	45	2	14	0	9	8	0	0	0	0	0	0	0	0	0	0
597	2	224766	181531	1	76	3	14	1	11	8
598	2	223909	221759	0	40	2	14	0	11	10	0	0	1	1	1	1	0
599	2	222410	181037	1	52	4	14	0	10	9	0	1	1	1	0	1	0	0	0	0	0
600	2	223910	221756	1	63	2	14	0	11	9	0	0	0	0	0	0	0	0	0	0	0	0
601	2	219801	525	1	84	4	14	1	11	10	0	0	0	0	0	0	0	0	0	0	0	0	0
602	2	221651	144315	0	70	8	15	0	14	12		0	0	0	0	0	0	1	0	0	0	0	0	0	0
603	3	224908	224907	0	56	1	21	0	16	13			0	0		0	0	0	0	0	0	0	0	0	0	0	0
608	1	226287	226286	0	55	1	10	1	5	4	1	0	0	0	0	0
609	1	226146	226145	1	71	1	11	0	7	6		0	0	0	0	0	0	0
610	1	219082	175250	1	58	4	10	0	8	6		1	0	0		0	0	0	0	0
611	1	222771	66459	0	69	25	11	1	8	6	0	0	0	0	0	0	0	0	0	0
612	2	228282	178620	1	37	1	14	0	13	9
613	2	224224	150438	0	40	3	16	0	14	11
614	1	225376	179756	1	48	4	10	0	7	6	1	1	1	0	0	0	0	0
623	2	225339	208985	1	37	2	14	0	11	9		0	0	1	0	1	0		0	0	0	0
628	1	227712	152920	1	50	5	10	1	7	6	0	0	0	0	0	0	1	0
630	1	218774	131294	1	70	19	11	0	8	6
631	2	223703	177799	0	48	4	12	0	9	8	0	0	0	0	0	0	0	0	0	0
634	2	224268	161943	0	68	10	14	0	12	9		0	0	0	0	0	0	0	0	0	0	0	0	0
635	2	224255	137032	0	64	14	14	0	15	9
637	1	225433	225432	1	49	1	10	0	8	6	1	1	1	1	1	1	1		1	1
639	1	227497	227496	0	55	1	11	0	8	7	1	1	0		0	0	0	0
640	1	227728	227727	0	70	1	10	1	7	6	0	0	0	0		0	0	0
641	1	227730	227729	1	60	1	10	0	7	6	0	1	1	0	0	0	0	0
644	2	225373	217	1	71	9	12	0	12	8		0	0	0	0	0	0	0		0	0	0	0
646	1	224790	224788	1	33	1	10	0	7	6
648	1	227280	173158	1	63	4	10	0	8	6	0	0	0	0	0	0	0	0	0	0
649	1	226735	226734	1	60	1	10	0	7	5	0	0	0	0	0	0	0	0
652	2	219260	153616	1	64	7	14	0	11	10	0	1	1	1	1	0	0	0	0	0	0	0	0
653	1	225187	222506	1	58	2	10	0	7	6	1	1	1	1	0	0	0
654	3	227996	227995	0	52	1	23	1	18	14	0	0	0	0	0	0	0	0	0	0	0	0	0	0	0	0	1		0
655	2	225663	225662	1	67	1	14	0	11	9	1	0	0	0	0	0	0	0	0	0	0	0
657	2	226634	226629	0	75	1	14	1	10	9
661	1	219200	168202	0	65	4	14	0	8	7	1	1	1	1	1	0	0	0	0
663	1	219208	168205	1	55	4	14	0	8	7		1
664	2	224984	154699	1	74	7	14	2	12	9		0	0	0	0	0	0	0	0	0	0	0	0	0
666	2	224761	217386	0	48	2	14	0	10	9	0	1	0	0	0	0	0	0	0	0	0
671	1	189863	113194	0	68	18	10	0	7	6	0	1	0	0	0	0	0	0
672	1	189868	115899	1	62	19	10	0	7	5	0	0	0	0	0	0	0	0
673	2	225280	224885	1	57	2	14	0	10	9
674	1	225717	170759	0	43	3	10	2	8	6		0	0		0	0	0	0	0	0
675	1	225889	225888	0	33	1	10	0	8	6		1	0	0	0	0	0	1	0
676	1	226479	226201	1	51	1	10	0	7	5	0	0	0	0	0	0	0	0
677	1	226481	226480	0	52	1	10	0	8	6	0	0	0	0	0	0	0	0	0
679	1	226709	173044	1	41	3	10	0	7	5	1	1	1	1	0	0	0	0
680	1	226981	221422	1	42	2	10	0	7	5	1	0	0	0	0	0		0
682	2	219718	188313	0	60	3	14	0	12	9	0	0	0	0	0	0	0	0	0	0	0	0	0	0
683	1	226901	180025	0	45	3	10	0	9	6		0	0	1	1	0	0	0	1	0
684	2	223006	208636	0	55	2	15	0	10	9	0	0	0	0	0	0	0	0	0	0	0
686	1	223956	223955	0	60	1	10	0	6	5	0	0	0	0	0	0	0
687	1	223070	223069	1	53	1	10	0	8	6	1	1	1	0	0	0	0	0
688	1	223050	220729	0	61	2	10	0	8	6		1	1	1	1
689	1	223051	170949	0	60	6	10	1	8	6	0	0	1	0	0	0	0	0	0	0
690	2	223486	171100	1	63	5	14	0	10	8
691	1	225108	179537	1	60	4	10	0	6	5	0	0	0	0	0	0	0
692	2	226271	226270	1	40	1	14	0	10	8	0	1	0	0	0	0	0	0	0	0	0
693	1	223356	166709	1	58	9	10	0	6	5	1	1	1	0	0	0	0
694	1	223358	223357	1	67	1	10	1	7	5	0	1	0	0	0	0	0	0
695	2	223485	171103	1	68	3	14	1	10	8	0	0	0	0	0	0	0	0	0	0	0
696	2	223582	223581	1	72	1	14	0	10	8	1	1	1	0	0	0	0	1
698	1	219937	219935	1	59	1	10	0	7	5	1	1	0	0	0	0	0	0
699	2	223055	192357	1	59	3	14	0	10	8	0	0	0	0	0	0	0	0	0	0	0
700	1	219943	219941	1	57	1	10	0	6	5		0	0	0	0	0	0
702	2	226890	226889	1	61	1	14	0	9	8	0	1	1	1	0	0	0	0	0	0
704	1	219940	219938	1	77	1	10	1	6	5
705	2	222558	221199	1	59	2	14	0	10	8	1	0	1	1	0	0	0	0	0	0	0	0
706	2	227138	227136	1	59	1	10	0	9	8	1	1	1	0	0	0	0	0	0	0
707	1	219893	217065	0	49	2	10	0	7	5	0	0	0	0	0	0	0	0
708	1	226696	226694	0	58	1	10	0	6	5
710	1	227333	227332	0	54	1	10	0	6	5	1	1	0	0	0	0	0
711	3	227919	138246	1	66	9	20	0	16	14	0	0	0	0	0	0	0	0		0	0	0	0	0	0	0	0
713	2	226118	155429	1	55	6	14	0	10	8	0	0	0	0	0	0	0	0	0	1	0
714	2	225161	221477	1	60	2	14	1	9	8	0	0	0	0	0	0	0	0	0	0
715	3	225823	192805	0	56	3	21	2	16	14	0	0	0	0	0	0	0	0	0	0	0	0	0	0	0	0	0
716	1	219878	190158	1	57	3	10	0	7	6	1	1	0	0	0	0	0	0
717	1	219904	219902	0	61	1	10	0	6	5
718	3	224027	221536	1	46	2	22	0	19	15	0	0	0	0	0	0	0	0	0	0	0	0	0	0	0	0	0	0	0	0	0
719	1	222865	148350	0	83	16	10	1	6	5
720	1	227892	227891	0	58	1	10	0	7	5	1	1		0	0	0
721	1	222205	165055	0	58	4	10	0	8	5
722	2	226222	226217	1	57	1	15	0	11	9	0	0	0	0	0	0	0	0	0	0	0	0
723	2	226960	226959	1	41	1	14	0	10	9	0	0	0	0	0	0	0	0	0	0	0
724	1	227390	227389	1	39	1	10	0	6	5	1	1	0	0	0	0	0
725	1	226751	226750	1	78	1	11	0	7	6	0	1	1	1	1	0	0	0
727	2	225961	225960	0	60	1	14	0	10	8	0	1	0	0	0	0	1	1	0	0	0
728	1	225023	225022	0	62	1	10	1	8	5	0	0	0	0	0	0	0	0	0
729	1	225073	225072	1	61	1	10	0	6	5	0	0	0	0	0	0	0
730	2	223510	184062	1	72	3	14	0	10	9	0	0	0	0	0	0	0	0	0	0	0	0
731	2	223911	222594	1	39	2	14	0	9	8	1	0	1	1	0	0	0		0	0
732	2	228056	155184	0	65	3	13	5	9	8		0	0	0			0
734	1	226952	226464	1	49	1	10	0	6	5	1	0	1	0	0	0	0
736	1	219281	182457	1	74	4	10	0	8	6
738	2	223511	192966	0	33	2	14	0	10	9	0	0	0	0	0	1	0	0	0	0	0	0
741	3	226628	30770	0	45	16	21	0	18	14
749	1	226989	226988	0	62	1	10	0	6	5
750	4	227532	184027	0	65	2	28	1	23	21		0	0	0	0	0	0	0	0	0	0	0	0	0	0	0	0	0	0	0	0	0	0	0
751	1	225955	189524	1	72	4	10	0	8	5
754	2	223475	222139	0	68	2	14	0	10	8	0	0	0	0	0	0	0	0	0	0	0
756	1	220606	208093	0	56	2	11	0	8	6	0	0	0	0	0	0	0	0	0	0
757	3	225363	136188	1	52	3	21	0	16	14	1	1	1	0	1	0	0	0	0	0	0	0	0	0	0	0	0
758	1	227533	154733	0	69	7	11	2	8	6		0	0	0	0	0	0	0
759	2	228335	219296	0	40	3	14	0	12	9							0	0	0	0	0	0	0	0
760	1	226323	144105	1	41	6	10	0	9	5
762	3	226316	226314	0	61	1	21	0	15	14	0	1	1	0	0		0	0	0	0	0	0	0	0	0	0
764	3	225362	117885	0	59	4	21	0	16	14
765	2	228854	228853	0	49	1	14	0	10	8			0	0	0	0	0	0	0	0	0
766	1	225510	225509	0	62	1	10	2	7	6	1	1	1	1	0	0	0	0
767	1	226725	226724	1	61	1	11	0	8	5		0	0	0	0	0	0	0	0
768	1	226727	226726	1	65	1	10	2	8	5	0	0	1	0	0	0	0	0	0
769	2	224316	217924	1	65	2	14	1	11	8		0	0	0	0	0	0	0	0	0	0	0	0
770	1	225122	190768	0	59	5	10	0	10	6
771	1	225159	163334	1	40	2	10	0	7	6	1	0	0	0	0	0	0	1
773	2	229027	229026	0	23	1	12	0	10	9	1	1	1	0	0	1	0	0	0	0	0	0
774	2	227982	190400	1	22	3	12	0	10	8
775	1	227221	227219	1	78	1	10	0	6	5	0	0	0	0	0	0	0
776	1	227426	227425	0	75	1	10	0	6	5
777	1	228798	185754	1	40	4	10	0	8	5	0	0	0	0	0	0	0	0	0	0
778	1	227007	227006	1	53	1	10	0	6	5	1	1	0	0	0	0	0
779	1	227009	227008	0	62	1	10	2	6	5	0	0	0	0	0	0	0
780	3	225476	2967	1	76	12	21	1	18	14	0	0	0	0	0	0	0	0
782	3	224462	218704	0	68	3	21	0	15	14	0	1	0	0	0	0	1	0	0	0		0	0	0	0
784	2	224611	224610	0	30	1	14	0	10	8	0	1	0	0	0	0	0	0	0	0	0
786	3	158449	15640	0	77	47	21	1	20	16		0	0	0	0	1	0	1	1	0	0	0	0	0	0	0	0	0	0	0	0
787	4	227130	224656	1	54	1	28	1	25	19
788	1	226342	226341	0	67	1	10	0	10	5	0	0	0	1	0	0	0	0	0	0
789	1	227065	222619	1	45	1	10	0	7	5	1	0	0	0	0	0	0	0
790	2	225371	1874	0	66	4	12	2	10	8		0	0	0	0	0		0	0	0	0
791	1	227064	227063	0	73	1	10	0	7	5	0	1	0	0	0	0	0	0
792	1	225056	156833	0	66	5	12	1	8	7
793	1	226338	226335	1	63	1	10	1	10	5	0	0	0	0	0	0	0	0	0	0	0
794	2	228638	109407	1	72	13	15	0	10	8	0	0	0	0	0
796	2	225490	218373	1	52	2	14	0	11	8		1	1	0	0	0	0	0	0	0	0	0	0
797	1	226436	123893	0	75	3	10	0	7	6
798	2	225043	182899	1	54	4	12	0	11	9	0	0	0	0	0	0	0	0	0	0	0	0	0
799	1	222713	188292	1	56	2	10	0	7	5
800	1	227300	227299	1	54	1	10	0	7	5
801	1	222712	188289	0	56	2	10	0	7	5
803	1	226428	226427	0	59	1	10	0	7	5	0	0	0	0	0	0	0	0
805	1	226425	181475	1	20	2	10	0	7	5	1	1	0	0	0	0	0	0
806	2	228915	228915	0	38	1	14	0	10	8
810	1	219976	195086	1	47	2	10	0	7	5	1	1	0	0	0	0	0	0
811	2	224185	222996	0	74	2	14	0	9	8	0	0	0	0	0	0	0		0	0
812	2	224187	224186	1	73	1	14	0	9	8	0	1	0	0	0	0	0	0	0	0
813	2	225793	225791	1	43	1	14	0	9	8
814	2	225915	225914	1	36	1	14	0	9	8
815	2	220056	163893	0	53	7	14	2	9	8	0	0	0	0	0		0	0	0	0
816	2	222340	28111	1	81	5	14	2	10	8		1	1	0	1	1	0	0	0	0	0	0
819	2	172681	58818	0	74	18	14	2	12	9	0		0	0	0	0	0	0	0	0	0	0	0	0
820	1	226421	226420	0	57	1	10	0	6	5	1	0	0	0	0	0	1
821	1	226722	226721	0	42	1	10	0	7	6
822	1	226828	220348	1	57	1	10	0	6	5	0	1	1	1	0	0	0
823	3	227827	227330	0	66	2	21	1	15	14	0	0	1	1	0	0	0	0	0	0	0	0	0	0	0	0
824	2	229115	229113	0	41	1	18	0	14	11
825	3	220378	220377	1	51	1	21	0	15	14	1	0	0	0	0	0	0	0	0	0	0	0	0	0	0	0
826	2	226486	189324	0	54	3	17	2	12	11	0	0	0	1	0	0	0	0	0	0	0	0	0
827	2	226793	226792	1	33	1	14	0	11	8
828	4	227168	177112	0	56	2	30	1	25	20		1	0	0	0	0	0	0	0	0	0	0	0	0	0	0	0	0	0	0	0	0	0	0	0
829	1	227575	227573	0	50	1	10	0	6	5	0	1	1	1	0	0	0
830	2	226999	226998	0	53	1	14	2	11	9	0	0	0	0	0	0	0	0	0	0	0	0	0
833	2	227171	227170	1	51	1	13	0	9	8	1	1	1	0		0	0	0	0	0
834	1	229202	229201	0	50	1	15	0	12	7
836	1	229052	218652	0	26	2	11	0	8	6
837	3	226676	226675	1	69	1	21	0	17	14	1	1	0	0	0	0	0	0	0	0	0	0	0	0	0		0	0
838	3	227734	227733	0	52	1	21	0	20	14	0	0	0	0	0	0	0	0	0	0	0	0	0	0	0	0	0	0	0	0	0
839	2	227813	178868	0	60	6	14	2	9	10	0	0	0	0	0	0			0	0
840	1	225404	225403	1	71	1	10	0	8	5
841	2	220781	218163	0	67	2	11	1	11	9	0	0	0	0	0	0	0	1	0	1	0
843	2	228307	191701	0	32	2	13	0	9	8	0	0	0	0	0	0	0	0	0	0
844	2	228308	191704	1	21	2	13	0	9	8
845	1	220450	220449	1	63	1	10	0	9	6	1	1	1	1	1	1	0	1	1	1
846	1	225486	225485	1	43	1	10	0	6	6
847	1	226761	226760	1	43	1	10	1	6	5
848	3	226973	226972	1	58	1	21	0	17	14	1	1	1	1	1	1	1	1	1	1	1	1	1	1	1	1	1	1
850	4	227326	227325	1	18	1	27	0	21	20	0	0	0	0	0	0	0	0	0	0	0	0	0	0	0	0	0	0	0	0	0	0
851	1	223009	218255	0	41	2	10	0	8	5	0	0	0	0		0	0	0	0
852	2	227675	227674	0	31	1	14	0	9	8	0	0	0		0	0		0	0	0
853	1	227125	227124	0	76	1	10	0	8	5	0	0	0	0		0	0	0	0
855	2	227567	166142	1	50	6	12	0	12	9
856	1	227424	227423	1	53	1	10	0	6	5	0	0	0	0	0	0	0
857	1	227452	227451	0	53	1	10	0	6	5	0	0	0	0	0	0	0
858	4	226957	226956	0	70	1	28	0	24	21	0	0	0	0	0	0	0	0	0	0	0	0	0	0	0	0	0	0	0	0	0	0	0	0	0
859	4	225234	225233	1	64	1	28	0	23	21	1	0	1	0	0	0	0	0	0	0	0	0	0	0	0	0	0	0	0	1		0	0	0
863	2	225166	185207	0	74	3	14	3	11	8
864	2	225167	185211	1	71	3	14	0	10	8	0	0	0	0	0	0	0	0	0	0	0
865	2	229379	194856	1	55	3	12	0	10	8	0	0	1	1	1	0	0	0
867	4	226763	226762	0	63	1	27	0	21	20	0	0	0	0	1	1	0	0	0	1	0	0	0	0	0	0	0	0	0	0	0	0
868	1	227542	227541	0	49	1	10	0	7	5	0	0	0	0	0	0	0	0
869	3	220900	118723	0	68	7	17	2	15	14
870	2	224975	192084	0	75	2	14	3	9	8
872	3	225884	149291	0	44	8	21	0	18	14	0	0	0	0		0
873	2	227643	227157	1	71	1	14	2	9	8	1	1	0		0	0				0
874	2	226545	226544	1	22	1	15	0	12	10
875	3	227247	227246	1	60	1	21	0	17	14
876	1	223625	214077	0	56	2	10	0	8	5		0
880	3	227090	227089	1	72	1	21	1	16	14	0	1	1	0	0	0	0	0	0	0	0	0	0	0	0	0	0
881	1	227150	188603	0	58	3	10	1	6	5	0	0	0		0	0	0
882	1	227151	195107	0	52	2	12	0	6	5	0	1	0	0	0	1	1
883	2	228305	228304	0	63	1	14	0	10	8	0	1	0	1	1	0	0	0	0	0	0
884	1	228672	228671	1	42	1	10	0	7	5
885	1	225866	189352	1	54	3	10	0	8	6	0	0	0	0	0	0	0	0	0	0
886	1	224503	224502	1	71	1	10	0	6	5	0	0	0	0	0	0
887	4	227203	222355	1	74	1	28	0	23	21	0	0	0	0	1	0	0	0	0	0	0	0	0	0	0	0	0		0	0	0	0	0	0
893	1	227698	175273	0	67	6	10	0	7	6	1	1	1	1	0	0	0	1
894	4	220871	129096	1	80	12	28	0	27	21	0	0	0	0	0	0	0	0	0	0	0	0	0	0	0	0	0	0	0	0	0	0	0	0	0	0	0	0
895	2	225447	180845	0	69	4	14	0	9	8	0	0	0	0	0	0	0	0	0	0
896	1	227406	164162	0	59	3	10	1	9	6	0	0	0	0	0	0	0	0	0	0
900	2	227095	227094	0	68	1	12	1	8	8	0	0	0			0	0		0
901	1	227349	227348	1	36	1	10	0	7	5	0	0	0	0	0	0	0	0
902	1	227351	227350	1	39	1	10	0	6	5	0	0	0	0	0	0	0
903	1	227486	227485	0	56	1	10	1	6	5	0		0	0
904	2	225134	225133	0	57	1	14	0	10	8	0	0	0	0	0	0	0	0	0	0	0
905	1	228974	172194	1	35	2	11	0	9	6
906	1	228855	56525	0	66	5	10	2	7	6
909	1	225877	225876	0	43	1	10	0	6	5		1	0
910	2	225924	225594	1	44	1	14	0	11	8	1	0	0	0	0	0	0	0	0	0	0	0
911	3	226882	226881	0	62	1	21	0	17	14	0	0	0	0	0	0	0	0	0	0	0	0	0	0	0	0	0	0
912	3	226975	226974	1	60	1	21	0	16	14	1	0	0	0	0	0	0	0	0	0	0	0	0	0	0	0	0
913	1	227790	166260	1	65	2	10	0	8	5	0	0	0	0	0	0	0	0	0
914	1	227792	227791	0	70	1	10	1	7	5
915	4	228164	228163	1	51	1	25	0	21	18	1	1	0	0	0	0	0	0	0	0	0	0	0	0	0	0	0	0	0	0	0	0
916	1	227309	153980	0	79	16	10	1	7	6	0	0
917	2	227233	227232	0	51	1	14	0	10	8	1	1	0	0	0	1	0	0	0	0	0
918	1	227278	227277	1	61	1	10	0	7	5	0	0	0	0	0	0	0	0
919	2	223157	163655	1	78	5	16	0	12	10	0	0	0	0	0	0	0	0	0	0	0	0	0	0
921	2	226579	226578	1	68	1	14	2	9	8	0	0	0	0	0	0	0	0	0	0
922	1	228573	228572	0	59	1	10	2	8	5	0	0	0	0	0	0	0	0	0
923	1	228575	228574	1	50	1	10	0	8	5	1	0	0	0	0	0	0	0	0
924	2	225424	225423	1	66	1	14	1	11	8	1	0	0	0	0	0	1	0	0	0	0	0	0
925	3	226883	159729	1	64	2	19	0	16	14
926	1	227812	180389	0	58	6	10	0	8	5	1	1			0	0
927	1	227549	227548	1	51	1	10	0	7	5	1	1	1	0	0	1	1	1
928	2	229079	222441	1	46	2	13	0	12	8	0	0	0	0	0	0	0	0		0		0
930	1	225466	150170	0	53	2	10	0	6	5		1
931	1	227022	227020	0	48	1	10	0	6	5	1	0	1	0
932	3	228041	228040	1	67	1	21	1	17	14		0					0	0	0	0	0	0	0	0	0		0	0
933	3	229174	149585	1	61	3	21	0	21	15	0	0	0	0	0	0	0	0	0	0	0	0	0	0	0	0	0	0	0	0	0	0
934	1	228316	194067	1	68	3	11	0	11	7	0	0	0	0		0	0	0	0	0	0	0
935	3	226830	226829	0	62	1	21	0	18	15	1	1	0	0	0	0	0	0	0	0	0	0	0	0	0	0	0	0	0	0
936	1	225837	192990	1	41	3	11	0	9	6	1	1	1	0	0	0	0	0	0	0	0
937	2	227574	227572	0	52	1	14	1	12	8	1	1	0	0	0	0	0	0	0	0	0	0	0
938	3	227436	227435	1	48	1	21	0	16	14	0	0	0	0	0	0	0	0	0	0	0	0	0	0	0	0	0
939	1	225678	220809	0	57	2	11	2	7	6					0	1	1
940	3	227434	227433	0	59	1	21	0	16	15	0	0	0	0	0	0	0	0	0	0	0	0	0	0	0	0	0
941	1	225836	192987	1	46	2	11	0	8	6	0	0		0	0	0	0	0	0	0
943	1	229008	229007	1	37	1	10	0	6	5	0	0	0	0	0	0	0
944	1	229010	220422	0	40	1	10	0	8	5		0	0	0	0	0	0	0	0
945	2	227821	227820	1	35	1	14	0	10	8
946	2	224879	224878	1	61	1	14	0	11	8
947	1	227850	47147	1	58	5	10	1	7	5
948	2	227818	227817	0	32	1	14	0	10	8
949	2	224877	224876	0	61	1	14	1	11	8
950	2	227753	187313	1	45	3	13	0	10	8	0	0	0	0	0	1	0	0	0	0	0
951	2	226753	226752	0	52	1	14	0	11	8
953	1	219894	217059	0	61	2	10	1	6	5
954	1	227165	112447	0	72	5	10	0	7	6	0	0	1	0	0	0	0	0
955	1	223255	188148	1	60	3	10	0	7	5	0	0	1		0	0	1	0
956	3	227459	227458	1	31	1	21	0	16	15	1	1	1	0	0		0	0	0	0	0	0		0	1	0	0
957	3	227448	219829	1	21	1	21	0	14	13
958	1	228416	228415	1	40	1	12	0	8	7	1	1	1	0	0	0	0	0	0
959	1	228418	228417	0	45	1	12	0	8	7	1	0	0	0	0	0	0	0	0
960	1	226500	125192	1	86	10	12	0	8	7	0	0	0	0		0
963	2	225623	172384	1	60	9	15	0	13	9	0	0	0	0	1	1	0	0	0	0	0	0		0
964	2	225624	172381	0	60	9	15	1	13	9	0	0	0	0	0	0	0	0	0	0	0	0	0	0
965	1	228550	228549	1	40	1	10	0	7	5
966	2	225642	219965	1	59	2	15	0	10	10	1	0	0	0	0	0	0	0		0
967	2	227356	188445	1	49	3	14	0	10	8	0	0	0	0	0	0	0	0	0	0	0
968	2	228332	228331	1	65	1	14	0	10	8
972	1	227745	217770	1	53	3	10	0	7	4	1	1	1	0	0	0	0	0
973	1	228506	228505	1	66	1	10	0	6	5
976	2	229586	180750	0	32	2	14	0	12	8	0	0	0	0	0	0	0	0	0	0	0	0	0	0
977	1	226645	220137	0	49	2	10	0	8	6	1	1	1					1
978	1	226648	226646	0	39	1	10	0	7	5
980	2	227355	208312	0	71	2	14	0	11	8
981	2	226122	154074	1	57	7	14	0	11	9	0	1	0	0	0	0	0	0	0	0	0	0
982	2	227002	227001	1	61	1	14	0	9	8		0	0	1	0	0	0	0	0	0
983	2	227004	227003	0	59	1	14	0	9	8	0	0	0		0	0	0	0	0	0
984	1	228251	228250	1	67	1	10	0	7	5	0	0	0	0	0	0	0	0
985	2	228979	18606	1	59	27	13	0	10	9		1	1	1	1	1			1	0	0
989	1	229870	123265	1	57	5	10	1	6	5	0	0	0	0	0	0	0
990	1	227152	208567	0	56	2	10	0	6	5	0	1	1	0	0	0	0
991	2	225739	225738	1	67	1	14	0	9	8	0	0	0	0	0	0	0	0	0	0
992	1	220462	22371	1	66	5	10	0	5	4
994	3	228642	228641	1	46	1	20	0	16	14	0	0	0	0	0	0	0	0	0	0	0	0		0	0	0	0
995	3	225487	149652	1	58	2	21	0	15	14	1	0	1	0	0	0	0	0	0	0	0	0	0	0	0	0
996	3	227857	4574	0	76	8	20	0	15	13
997	2	227140	208111	1	53	2	13	0	9	8	1	1	0	1
998	3	227981	227980	0	59	1	21	0	15	14	0	0	0	0			0	0	0	0	0	0	0	0	0	0
999	3	228443	170826	1	63	3	20	0	16	15	0	1	0	0	0	0	0	0	0	0	0	0	0	0	0	0	0
1001	3	226888	226887	1	57	1	21	0	15	14	1	1	1	1	0	1	0	0	0	0	0	0	0	0	0	0
1002	2	228044	115528	0	67	17	16	1	13	9	0	0	0	0	0	0	0	0	0	0	0	0	0	0	0
1004	1	226419	226418	1	57	1	10	0	7	5		0	1	1	0	0	0	0
1005	2	226650	145860	1	62	14	16	1	12	10	0	0	0	0	0	0	0	0	0	0	0	0
1006	2	228154	220696	1	71	2	14	0	10	8	0	1	0				0	0
1009	2	227877	227876	0	52	1	14	0	10	9	0	0	0	0	0	0	0	0	0	0	0	0
1010	1	227462	227461	0	37	1	10	0	7	6	0	1	0	0	0	0	0	0
1012	1	229135	229134	0	57	1	10	2	6	6	1	0	1	1	0	0	0
1013	1	229252	156587	0	63	2	10	0	9	5
1014	1	229546	229544	1	49	1	12	0	10	6	1	0	1	0	0	0	1	0	0		0	0
1016	1	224997	187757	1	45	2	10	0	6	5		0	0	0	0	0	0
1017	1	224998	66055	1	77	4	10	3	6	5	0	0	0	1	0	0	0
1018	2	228238	228236	0	49	1	14	2	9	8	1	0	1	1	1	0	0	0	0	0
1019	1	228958	228957	1	42	1	10	1	6	5	0	1	0		0	0	0
1020	1	229101	229100	1	28	1	10	0	6	5	1	0	0	0	0	0	0
1021	1	229709	229708	1	57	1	10	0	7	5	0	1	1	0	0	0	0	0
1022	1	224280	139488	1	50	6	10	2	9	6	0	0	0	0	0	0	0	0	0	0
1023	1	229529	229528	0	49	1	10	1	6	4		0	0	0	0	0	0
1024	2	228566	217248	0	44	2	14	0	10	9	1	1	1	1	1	1	0	0	0	0	0
1025	2	220998	218542	0	69	2	14	0	11	8	0	0	0	0	0	0	0	0	0	0	0	0	0
1026	1	228920	228919	1	36	1	10	0	6	5
1027	2	225727	219310	1	47	2	14	0	9	8
1028	1	227143	156877	0	68	7	10	1	7	5	1	0	0	0	0	0	0	0
1029	2	228173	228172	1	58	1	14	0	9	8	0	0	0		0	0	0	0	0
1030	1	227121	189098	1	53	3	10	0	6	5	0	0	0	0	0	0	0
1032	3	228014	228013	1	49	1	21	0	15	14	0	1	0	0	0	0	0	0	0	0	0	0	0	0	0	0
1034	3	226749	209765	1	64	1	21	0	15	14	0	1	0	0	0	0	0	0	0	0	0	0	0	0		0
1036	1	219013	208752	1	53	2	10	0	6	5	1	1	1	1	1	1	0
1037	1	229121	229120	0	64	1	10	1	6	5	0	0	0	0	0	0	0
1038	1	229118	228902	1	55	1	10	0	6	5	1	1	0	0	0	0	0
1039	1	227644	227642	1	19	1	10	0	6	5	0			0
1041	1	230064	230063	1	44	1	10	0	7	5		0	0	1	1	0	0	0
1042	2	227639	172991	0	52	3	16	0	12	10
1043	1	225974	172994	0	82	5	14	2	11	6		0	0	0	0	0	0	0	0	0	0	0
1044	3	229636	185906	0	53	3	18	0	16	14		0	0			0	0	0	0	0			0					0
1045	1	229324	229323	0	42	1	10	0	6	5
1047	2	222722	36766	0	74	4	16	0	11	10	0	0	0	0	0	0	0	0	0	0	0	0
1048	3	226298	226297	1	70	1	21	1	16	14	1	1	0	0	0	0	0	0	0	0	0	1	0	0	0	0	0
1049	2	227979	192327	0	57	3	14	3	9	8
1051	1	228508	215503	0	43	1	10	0	7	5	1	1	1	0	1	0	1	0
1052	2	229343	229342	1	20	1	14	0	9	8
1053	2	228892	228890	1	53	1	14	0	9	8	0	0	0	0	0	0	0	0	0	0
1054	2	220984	219979	0	45	2	14	0	12	9		0		0	0				0	0
1055	1	228507	228124	1	50	1	10	0	7	5	0	1	1	1	0	1	1	0
1056	2	228377	228376	1	29	1	14	0	10	8	1	1	1	1	1	1	1	1	1	1	1
1057	2	223685	173004	0	57	3	14	0	10	8	0	0	0	0	1	1	0	0	0		1
1059	2	223687	194697	1	32	2	14	0	10	8
1060	1	227841	219441	0	71	2	10	1	6	5
1061	1	228558	155554	0	55	3	10	0	7	6	0	0	0	1	0	0	0	0
1062	1	228562	228561	1	22	1	10	0	6	5	1	1	1	0	0	0	0
1064	1	229290	229289	0	54	1	10	1	6	5	0	0	0	0	0	0	0
1066	2	227208	227207	1	59	1	14	2	10	8		0	0	0	0	0		0	0
1067	1	227840	219443	0	69	3	10	2	6	5	1	1	0	0	0	1	1
1068	2	228276	162360	0	76	3	15	2	11	9	0	0	0	0	0	0	0	0	0	0	0	0
1069	2	221083	188708	0	65	3	13	0	10	8	0	0	1	0	0	0	0	0	0	0	0
1070	2	221084	188729	1	69	3	13	0	10	8	0	1	0	0	0	0	0	0	0	0	0
1071	2	223360	161639	0	67	5	14	0	9	8		0	0	0	0	0	0	0	0	0
1072	1	226585	221959	1	43	2	11	0	7	6	0	1	0	0	0	0	0	0
1073	2	226857	103447	1	58	10	14	0	11	9	1	0	0	0	0	0	1	0	0	0	0	0
1074	3	227928	227926	1	81	1	21	0	16	14	0	0	0	0	0	0	0	0	0	0	0	0	0	0	0	0	0
1075	2	228263	228262	1	25	1	14	0	9	8
1076	2	228726	228725	1	49	1	14	0	10	8	1	1	0	0	0	0	0	0	0		0
1078	1	229770	229769	0	56	1	10	0	6	5	0	0	0	0	0	0	0
1081	1	223391	223390	1	73	1	10	0	7	5
1083	2	226917	226916	1	40	1	14	0	10	8	0	1	1	0	0	0	0	0	0	0	0
1084	2	228923	228922	0	62	1	14	1	9	8	0	0	0	0	0	0	0	0	0	0
1086	1	228060	228059	1	40	1	10	0	6	5	0	0	0	0	0	0	0
1088	1	229818	229817	1	52	1	10	0	6	5
1090	3	227925	227924	0	53	1	21	0	16	14	1	1	0	0	0	0	0	0	0	0	0	0	0	0	0	0	0
1091	1	229522	229521	1	69	1	10	2	6	5	0	0	0	0	0	0	0
1093	3	227611	227610	1	54	1	21	0	16	14	0	0	0	0	0	0	0	0	0	0	0	0	0	0	0	0
1095	1	227974	227973	1	31	1	10	0	6	5	1	1	1	1	0	1	1
1097	1	227603	227602	1	46	1	10	0	6	5	1	0	0	0	0	0	0
1098	1	229997	229996	1	52	1	10	0	6	5	0	1	0			0	0
1099	1	228019	228017	0	73	1	10	0	6	5	0	0	0	0	0	0	0
1100	2	229388	180355	1	52	2	14	0	11	8	0	1	0	0	0	0	0	0	0	0	0	0	0
1101	2	228531	228530	0	28	1	15	0	11	9	1	1	1	0	0	1	1	0	0	0	0	0
1102	3	228313	228312	1	49	1	21	0	17	14	0	0	0	0	0	0	0	0	0	0	0	0	0	0	0	0	0	0
1104	1	227723	227722	0	51	1	10	0	8	5	0				0
1108	2	228186	173895	0	33	2	13	0	10	8	0	1	1	1	0	0	1	0	0	0	0
1109	2	228184	228183	1	28	1	13	0	10	8	0	0	0	0	0	0	0	0	0	0	0
1110	2	227781	227780	0	51	1	14	0	9	8	1	1	1	1	0	0	0	0	0	0
1111	2	228905	177842	0	61	2	14	1	10	8	0	1	1	1	1	1	1	1	0	0	0
1112	2	228230	228229	1	74	1	14	2	11	8
1118	1	228532	189801	1	41	3	10	0	7	5
1119	1	228533	189804	1	39	2	10	0	7	5
1120	1	226798	226796	0	73	1	10	3	6	5	0	0	0	1	0	0	0
1122	2	229410	229409	1	50	1	14	0	9	8	1	0	0	0	0	0	0	0	0	0
1123	1	229517	229516	1	66	1	10	0	7	5	0	0	0	0	0	0	0	0
1124	1	229456	229455	0	69	1	10	1	7	5	0	0	0	0	0	0
1126	2	227338	190172	0	70	3	14	2	10	8		0	0	1	0	1	0	0	0	1	0
1127	2	226244	190172	1	70	1	14	2	10	8	1	1	1	0	0	0	0	0	0	0	0
1128	1	226948	226947	0	55	1	10	0	7	6	1	0		0	0	0	0	0
1129	1	229800	229799	1	21	1	10	0	7	6	1	0	1	0	0	0	0	0
1131	1	229173	229172	1	32	1	10	0	7	5	1	1	0	0	0	0	0	0
1133	1	225042	225041	1	52	1	10	0	7	5	1	1	1	0	0	0	0	0
1134	1	225317	115786	1	65	5	10	0	9	5		0	0	0	0	0	0	0	0	0
1135	1	225318	151815	0	66	7	10	0	8	5	0	1	1	1	0	1	1	1	1
1136	1	228790	226466	1	40	1	10	0	7	4	0	0	0	1	0	0	0	0
1137	3	228770	228769	1	49	1	21	0	15	14
1138	3	224860	224859	1	62	1	28	0	16	15
1139	1	229054	228791	0	48	1	10	0	7	4	1	1	0	0	0	0	0	0
1140	3	224858	224857	1	60	1	28	0	16	15
1141	1	228254	228115	1	37	1	10	0	6	5	0	1	0	1	0	0	0
1142	1	228341	228339	1	47	1	14	0	8	7	0	0	0	0	0	0	0	0	0
1143	3	228927	228926	1	57	1	19	0	14	13	1	1	0	0	0	0	0	0	0	0	0
1150	1	228321	130302	0	57	8	10	1	6	5	0	0	0	0	0	0	0
1151	1	228322	218611	1	57	2	10	1	6	5
1152	1	228325	228323	1	22	1	10	0	6	5
1153	1	229728	229727	0	52	1	11	0	6	5	0	0		0	0	0	0
1154	2	229932	189218	1	47	2	13	0	12	8
1155	2	229969	229968	1	39	1	17	0	13	11	0	0	0	0	0	0	0	0	0	0	0	0	0	0
1156	2	221870	219862	1	62	2	14	0	9	8	0	1	0	0	0	0	0	0	0	0
1159	3	225857	225856	1	27	1	21	0	16	13	1	1	1	1	1	1	0	0	0	0	0	0	0	0	0	0
1160	3	225859	225858	1	29	1	21	0	16	15	0	0	0	0	0		0	0	0	0	0	0	0	0	0	0	0
1162	1	227536	227535	1	47	1	10	0	6	5
1165	3	228824	228823	1	59	1	19	0	15	13	0	0	0	0	0	0		0	0	0	0	0	0	0		0
1166	3	229549	229548	1	25	1	19	0	15	14
1168	2	227819	225137	1	49	1	14	0	11	10	0	1	0	0	0	0	0	0	0	0	0	0
1169	1	228756	228755	0	52	1	10	0	8	5		1	0	0	0	0	0	0	0
1170	1	228841	228840	1	36	1	10	0	7	5
1175	1	230477	155984	1	55	7	10	0	11	6		0	0	1	0	0	0	0	0	0
1176	1	227902	227897	1	46	1	10	0	7	5	1	1	1	0	0	0	0	0
1177	1	226592	137000	1	61	2	10	0	7	5	0	0	0	0	0	0	0	0
1179	2	226703	226702	1	45	1	13	0	9	8	1	1	1	0	0	0	0			0
1181	2	224151	169428	0	58	6	16	1	12	10
1182	2	229463	229462	1	55	1	14	0	9	8	0	0	0	0	0	0	0	0	0	0
1184	2	229606	120254	1	68	4	14	1	12	9	1	1	1	0	0	0	0	0	0	0	0	0	0
1187	2	225316	225315	1	73	1	14	0	10	8
1188	2	227942	172326	1	63	3	14	0	10	8	0	0	0	0	0	0	0	0	0	0	0
1189	3	224617	145184	0	54	2	21	0	19	14		0	0	0	0	0	0	0	0	0		0	0	0	0	0	0	0	0	0
1190	2	227079	227078	1	57	1	14	0	11	8	1	1	1	0	0	0	0	0	0	0	0	0
1192	3	228655	228654	0	58	1	21	0	17	14	0	0	0	0	0	0	0	0	0	0						0	0	0
1193	1	230208	150904	1	55	3	10	0	6	5	1	1	0	1	0	0	0
1195	1	230588	230587	1	24	1	10	0	6	5	0	0	0	0	0	0	0
1196	1	225919	170239	0	43	5	10	0	7	6	1	0	1	0	0	0	0	0
1197	1	228298	228297	0	38	1	10	0	6	5	0	0	0	0	0	0	0
1200	2	229917	184030	0	72	3	14	1	9	8
1202	1	229999	222261	1	59	3	10	1	6	5	0	0	0	0	0	0	0
1203	1	227914	227913	0	54	1	10	0	8	5	1	0	0	0	0
1204	1	225361	188157	1	43	2	10	0	8	5		0	1	0	0	0	0	0	0
1205	2	229466	182305	0	79	3	14	0	12	8
1206	1	229595	229594	0	45	1	11	0	9	7		0	0	0	0	0	0	0	0
1207	1	229597	229596	1	44	1	11	0	9	6			0	1	0	0	0	0	0	0
1209	1	229123	229122	1	47	1	10	0	6	5	1	0	0	0	0	0	0
1210	1	230326	230325	1	56	1	10	0	7	5		1				0	0
1211	2	230178	230177	0	63	1	14	0	9	8	1	0	0	0	0	0	0	0	0	0
1214	2	228918	228917	1	49	1	14	0	13	8	0	1	0	0	1	0	0	0	0	0	0	0	0	0
1216	2	228454	228453	0	41	1	14	0	9	8
1219	4	227027	227026	1	56	1	28	0	23	21	0	1	1	0	0	0	0	0	0	0	0	0	0	0	0	0	0	0	0	0	0	0	0	1
1222	2	229537	229345	0	55	1	14	0	10	8	0	0	0	0	0	0	0	0	0	0	0
1224	3	229103	229102	1	50	1	18	0	15	13	1	1	0	0	1	0	0	0	0	0	0	0	0	0	0	0
1225	2	229302	229300	1	57	1	14	0	9	8	1	0	1	0	0	0	0	0	0	0
1226	1	225457	170417	1	58	5	10	1	7	5	1	0	0	0	0	0	0	0
1227	2	228260	228259	1	49	1	14	0	11	9	1	0	0	0	0	0	0	0	0	0	0	0
1228	2	230324	230323	0	59	1	14	0	10	8	0	1	1	0	0	0	0	0	0	0	0
1229	2	230415	120117	0	43	5	15	0	11	9
1230	2	229499	229498	1	62	1	14	0	10	8	0	0	0	0	0	0	0	0	1	0	0
1231	2	229448	229447	0	73	1	14	2	9	8	0	0	0	0	0	0		0	0	0
1233	4	227786	121254	1	58	2	28	0	22	21	1	0	0	1	0	1	0	0	0	0	0	0	0	0	0	0	0	0	1	0	1	0	0
1234	4	227789	227787	0	57	1	28	1	22	21	0	0	0	0	0	0	0	0	0	0	0	0	0	0		0	0	0	0	0	0	0	0
1238	2	229165	119507	0	75	4	12	3	9	8	0	0	0	0	0	0	0	0	0	0	0
1240	3	229539	229538	0	50	1	21	0	18	15	0	1	0	1	0	0	0	0	0	0	0	0	0	0	0	0	0	0	0	0
1241	2	229611	163206	1	34	4	12	0	10	8
1242	1	229426	220295	1	33	2	11	0	8	6	0	0	0	0	0	0	1	0		0
1243	1	229081	229080	0	31	1	10	0	6	5	0	0	0	0	0	0	0
1244	1	228851	228850	1	69	1	17	0	15	7
1245	3	227894	227893	1	21	1	21	0	16	14	0	0	0	0	0	0	0	0	0	0	0	0	0	0	0	0	0
1246	1	229157	229156	1	53	1	10	0	6	5	1	1	1	0	0	0	0
1247	3	229020	133279	1	67	5	21	0	14	13	0	0	0	0	0	0	0	0	0	0	0	0	0	0	0
1249	2	229400	131102	1	37	8	14	0	11	8		1	1	1	1	1	1	1	0	0	0	0	0
1252	4	229280	229279	1	37	1	28	0	21	19	1	0	0	0	0	0	0	0	0	1	0	0	0	0	0	0	0	0	0	0	0	0
1253	2	229723	154877	1	42	3	14	0	12	8		0	0	0		0	0	0	0	0	0	0	0
1254	1	227971	227970	1	65	1	10	0	8	5	0	1	1	1	1	1	0	0	0
1255	1	227967	227966	0	69	1	10	0	8	5	1	0	1	0	0	0	0	1	0
1260	2	227370	227369	1	48	1	14	0	9	8	0	1	1	1	1	1	1	0	1	1
1261	2	227953	227951	0	51	1	14	3	9	8	0	0	0	0	0	0	0	0	0	0
1262	3	229680	229679	1	55	1	21	0	16	14	0	0	0	0	0	0	0	0	0	0	0	0	0	0	0	0	0
1263	3	229682	229681	0	57	1	21	0	16	14	0	0	0	0	0	0	0	0	0	0	0	0	0	0	0	0	0
1264	4	228222	114743	1	61	9	28	2	22	20
1265	3	192119	188347	0	82	2	21	1	15	13	0	0	0	0	0	0	0	0	0	0		0	0	0	0	0
1267	2	221833	189408	1	71	4	14	0	12	9	0	0	0	0	0	0	0	0	0	0	0
1268	2	221834	189405	1	42	3	14	0	12	9	0	0	0	0	0			0
1269	2	227743	227742	1	28	1	14	0	9	8
1270	3	227958	172258	0	48	3	21	0	16	14	0	1	1	1	0	0	0	0	0	0	0	0		0	0	0	0
1271	2	229348	229347	0	53	1	14	0	11	8		1	0	0	0
1272	2	229350	229349	1	47	1	14	0	11	8	1	0	0	0	0	0	0	0	0	0	0	0
1273	1	229454	229453	0	72	1	10	0	8	5
1274	1	229762	220802	1	42	2	10	0	8	6	1	1	1	1	0	0	0	0	0
1275	3	229788	229787	0	54	1	20	0	15	14	0	1	1	1	0	0	0	0	0	0	0	0	0	0	0	0
1276	1	230096	230095	1	39	1	10	0	7	6	1	0	0	1	0	0	0	0
1277	1	230148	230146	0	55	1	10	0	9	6	0	0	0	0	0	0	0	0	0
1279	3	227081	227080	0	62	1	21	0	17	14	0	0	0	0	0	0	0	0		0	0	0		0	0	0	0	0
1280	3	227083	227082	1	57	1	21	0	16	14	0	1	1	1	1	1	0	0	0	1	0	0	0	0	0	0	0
1281	3	227085	227084	1	24	1	21	0	17	14	1	1	0	0	0	1	0	0	1	0	0	0	0	0	0	0	1	1
1282	1	227131	218339	0	57	2	13	0	8	7	0	0	0	0		0	0	0	0
1283	2	229501	229500	0	50	1	18	1	13	12	0	0	0	0	1	0	0	0	0	0	0	0	0
1284	4	229632	229631	0	66	1	28	0	22	21
1285	2	229947	229946	1	50	1	14	0	11	9	1	0	0	0	0	0	0	0
1286	1	230307	230306	1	44	1	10	0	7	5	0	0	0	0	0	0	0	0
1287	1	230501	230500	0	67	1	10	1	6	5	1	1	0	0	0	0	0
1288	1	230774	228372	1	47	1	10	1	6	5	1	0	1	0	0	0	0
1291	3	225687	127948	0	66	4	21	1	16	14	0	0	0		0			0						0
1292	1	228117	228116	1	42	1	10	0	8	5	0	0	0	0	0	0	0	0	0
1293	2	229616	218120	0	50	3	15	0	12	9
1294	1	228278	228277	1	41	1	10	0	8	5	1	1	0	0	0	0	0	0	0
1295	1	226817	218015	1	60	2	10	0	8	6		0	1	1	0	0	0	0	0	0
1297	2	229412	229411	1	51	1	14	0	10	8	1	1	1	0	0	0	0	0	0	0	0
1298	4	230780	179165	1	19	2	26	0	23	21	0	0	0	0	0	0	0	0	0	0	0	0	0	0	0	0	0	0	0	0	0	0
1299	4	230779	174057	1	24	3	26	0	23	21		0	0	0	0	0	0	0	0	0	0	0	0	0	0	0	0	0	0	0	0	0
1300	2	228437	228435	0	72	1	14	1	10	8	1	1	0	0	0	0	0	0	0		0
1301	2	225930	187010	1	46	2	14	0	11	9	0	0	0	0	0	0	0	0	0	0	0
1302	2	229823	229822	1	76	1	14	0	9	8	0	0	0	0	0	0	0		0	0
1303	1	230559	230557	0	62	1	10	0	6	4	1	0	0	0	0	0	0
1304	2	229257	229256	1	54	1	14	0	10	8			0		0	0	0	0	0	0
1305	2	229868	229867	1	51	1	17	0	11	9	1	0	0	0	0	0	0	0	0	0	0	0
1306	2	229760	30284	1	74	19	15	1	12	11		1	1	0	0	0	0	0	0	0	0	0	0	0
1307	1	229404	229403	0	70	1	10	1	6	5	0	0	0	0	0		0
1308	2	228720	228719	1	56	1	14	0	9	8	1	1	1	0	0	0	0	0	0	0
1309	1	228274	228273	0	55	1	10	0	7	5
1310	1	230850	141278	1	60	2	10	0	10	6
1311	1	227804	221835	0	37	2	10	0	7	6	0	0	0	0	0	0	0	0
1314	1	229210	229209	0	67	1	10	1	6	5	0	1	0	0	0	0	0
1315	1	228272	228271	1	55	1	10	0	7	5
1316	2	228492	228491	1	26	1	16	0	11	10	0	0	0	0	0	0	0	0	0	0	0	0
1317	2	219639	156210	0	61	7	14	1	12	8	0	0	0	1	1	0	0	0	0	0	0	0	0	0
1318	2	230464	230463	1	54	1	14	0	10	8	1	0	1	0	0	0	0	0	0	0	0
1319	2	230740	230739	1	50	1	14	0	10	8	0	0	0	1	1	0	0	0	0	0	0
1320	2	219640	156213	0	76	8	14	2	10	9		0
1321	1	230245	230244	0	48	1	14	0	9	7		0		0	0		0	0	0	0
1324	2	228490	228489	1	63	1	16	0	11	10		0	1		1	1	1	1	1	1	1	1
1325	1	230873	230872	1	43	1	10	0	8	5	1	1	0	0	0	0	0	0	0
1326	2	230420	230419	0	50	1	13	0	10	8	0	0	0	0	0	0	0	0	0	0	0
1328	1	229641	173656	1	66	2	12	0	8	7
1329	2	230479	230478	1	42	1	15	0	9	8
1330	2	225942	225941	1	52	1	14	0	9	8	1	0	1	0	0	0	0	0	0	0
1331	2	228772	228771	0	46	1	18	0	13	12	1			1	0
1333	1	230366	173646	0	65	4	11	3	8	7	1	1	1	1	1	0	0	0	0	0
1334	1	230805	230804	0	37	1	10	0	7	5	1	1	1	1	1	0	0	0
1335	1	230571	230570	1	23	1	10	0	6	5	1	0	0	0	0	0	0
1336	3	227455	227454	1	63	1	21	0	16	14	0		0	0	0	0		0	0	0	0	0	0	0	0
1337	2	230124	102903	0	70	9	15	0	12	9	0	0	0	0	0	0	0	0	0	0	0	0	0	0
1338	1	229414	229413	1	48	1	10	0	6	5	1	1	0	0	0	0	0
1339	1	229418	229417	0	49	1	10	0	7	5	0	0		0	0		0	0
1340	1	229715	229714	1	45	1	10	0	6	5	1		0	0	0	0	0
1341	3	222330	49150	0	54	8	23	1	20	17
1343	1	229670	181505	1	20	2	12	0	8	7
1345	1	227457	218384	0	62	3	10	0	6	5	0	1	0		0	0	0
1348	1	230660	219026	1	70	2	10	2	6	5	1	1	1	0	0	0	0
1349	1	229344	171451	1	78	3	10	0	8	6	0	1	1	1	0	0	0		0	0
1350	3	229774	179789	1	30	5	23	0	19	16	0	0	0	0		0	0	0	0	0		0		1	0	0	1	0	0	0
1351	1	229236	21446	1	44	9	14	0	8	7	1	1	1	1	0	0	0	0	0
1353	3	228653	228652	1	57	1	21	0	16	14	1	1	0	0	0	0	0	0	0	0		0	1	0	0	0	1
1354	2	230029	230025	0	47	1	14	0	12	9
1355	2	229558	229557	0	58	1	14	2	9	8	0	1	1	1	1	0	0	1	1	0
1357	1	230293	230292	0	62	1	12	0	9	7
1358	3	224705	151986	1	64	2	21	0	18	15		0	0	0	0	0	0	0	0	0	0	0	0	0	0	0	0	0	0
1359	3	229433	172755	1	77	2	21	2	16	14
1360	1	230150	228887	1	59	1	10	0	6	5	1	0	0	0	0	0	0
1362	1	230359	193879	1	35	3	11	0	9	7	1	1	0	0		0	0	0	0	1	0
1363	2	230486	230485	0	35	1	14	0	11	8
1364	3	230152	230151	1	64	1	21	0	16	15	1	1	1	1	0	0	0	0	0	0	0	0	0	0	0	0	0
1365	3	224439	224438	1	54	1	21	0	16	14	1	0	1	0	0	0	0	0	0	0	0	0	0	0		0	0
1366	1	228842	163371	1	60	2	10	0	6	5	1	0	0	0	0	0
1367	2	229040	191518	1	55	2	14	0	11	9	0	0	0	0	0	0	0	0	0	0	0	0	0
1369	1	229861	218007	1	58	2	10	0	7	5	1	0	0	0			0
1371	2	227653	227652	1	19	1	28	0	19	8	0	0	0	0		0	0	0	0					0				0
1373	1	229888	175870	1	67	3	10	0	7	5	1	1	0	0	0	0	0	0
1374	1	230638	163620	1	56	5	10	0	7	7	1	1		0	0	0	0	0
1375	2	226304	218495	1	76	2	14	0	10	8
1376	1	229944	174115	0	30	2	10	0	6	5
1377	3	231052	167031	0	65	4	16	1	14	13		0	0	0	0	0	0	0	0	0	0	0	0	0	0	0
1379	1	229782	166928	0	67	9	10	0	7	5	0	0	0	0	1	0	0	0
1380	1	227875	227874	0	51	1	10	0	8	5	0	0	0	0	0	0	0	0	0	0
1381	1	230074	216998	1	50	2	10	0	7	6
1382	1	230075	217001	1	24	2	10	0	7	6
1383	1	230153	192745	1	72	2	10	0	8	5	0	1	1	0	0	0	0	0	0
1384	1	230454	230453	1	66	1	10	0	6	5	1	1	1	1	0	0	1
1385	2	230354	230353	1	33	1	14	0	9	8	1	1		1	0
1386	1	229803	229802	0	53	1	10	1	7	6	0	0	1	0	0	0	0	0
1387	3	228667	228666	1	43	1	21	1	17	16	0	1	0	0	0	0	0	0	0	0	0	0	0	0	0	0	0	1	1
1388	1	231041	186820	1	24	2	10	0	8	6
1389	4	228943	156171	0	53	5	27	0	21	20	1	1	1	0		0	0	0	0	0	0	0	0	0	0	0	0	0	0	0	0	0
1390	2	229855	229854	0	47	1	14	0	9	8	1	1	1	0	0	1	0	0	1	0
1391	1	230834	230833	0	54	1	12	0	8	7		0	0	0	0	0	0	0	0
1392	3	230380	230379	1	44	1	21	0	16	14	1	1	0	0	1	0	0	0	0	0	0	0	0	0	0
1393	1	230622	230586	0	55	1	10	2	6	5	0	0	0	0	0	0	0
1394	1	229815	183051	1	72	4	11	1	7	6	0	0	0	0	0	0	0	0
1395	1	229816	183055	0	41	2	11	0	7	6	0	0	0	0	0	0	0	0
1396	2	230309	230308	0	74	1	14	1	10	8	0	0	0	0	0	0	0	0	0	0	0
1397	3	230339	230338	1	48	1	21	0	16	14	1	0	0	0	0	0	0	0	0	0	0	0	0	0	0	0	0
1398	2	221652	148072	1	58	7	14	0	12	9		0	0	0	0	0	0	0	0	0	0	0	0	0
1399	1	222209	191160	0	62	3	10	0	7	6	0	0	0	0	0	0	0	0
1400	1	222210	191163	1	61	3	10	0	7	6	0	0	0	0	0	0	0	0
1402	2	222534	179240	1	60	6	14	0	11	9				0		1	0		0			0	0
1403	2	227251	227249	1	54	2	14	0	10	9	0	0	0	0	0	0	0	0	0	0	0	0
1404	1	227265	227264	1	53	1	10	0	7	5	1	1	0	0	0	1		0
1405	1	227402	227401	1	57	1	10	0	6	5	1	0	0	0	0	0	0
1406	2	228081	228078	0	56	1	14	0	10	8	1	1	1	0	0	0	0	0	0	0	0
1409	2	229839	140823	1	53	5	15	0	11	8	1	1	0	0	0	0	0	0	0		0	0
1410	2	229938	229936	1	62	1	14	0	11	9	1	0	0	0	0	0	0	0	0	0	0	0	0
1412	1	229730	103601	1	77	8	14	0	10	7	0	0	0	0	0	0	0	0	0	0	0
1413	3	228983	149467	1	41	5	21	0	16	14	0	1	0	0	0	0				0	0	1	0	0	0	0
1414	3	229025	229024	1	36	1	21	0	16	14	1	1	1	0	0	0	1	0	0	0	0	0	0	0	0	0	0
1417	2	229214	229213	1	48	1	14	0	10	9	0	1	0	0	0	0	0	0	0	0	0
1418	2	229773	183032	1	54	4	14	0	10	8	0	0	0	0	0	0	0	0	0	0	0
1419	2	230225	106734	1	53	3	14	0	9	8	1	1	0	0	0	0	0	0	0
1420	2	230715	220287	0	32	2	15	0	10	9
1421	1	230689	230688	0	64	1	11	0	9	6	0	0	0	0
1422	1	230996	220705	0	32	2	11	0	9	7	0	0	0	0
1423	2	231040	231039	1	65	1	14	0	10	8		0	0	0		0	0	0	0	0
1424	1	229303	222217	1	66	1	10	0	7	6	1	1	1	1	0	0	0	0
1426	1	229307	229305	1	64	1	10	0	7	6	0	0	0	0	0	0	0	0
1427	1	231271	231270	0	62	1	10	0	6	5	0	0	0	0	0	0	0
1428	1	230539	105618	1	39	11	11	0	8	6	0	1	0	0	0	0	0		0	0
1429	1	230385	230384	1	43	1	11	1	6	5	0	0	0	1	0	0	0
1430	1	231398	231397	1	63	1	10	0	6	5	0	1	0	0	0	1	0
1431	3	230933	179796	1	73	2	21	1	16	14
1432	2	230261	1238	1	71	8	14	0	11	8
1433	3	228498	140895	0	63	5	21	1	16	14	0	0	0	0	0	0	0	0	0	0	0	0	0	0	0	0	0
1435	1	229136	218838	1	60	2	10	0	6	5	0	1	1	0	0	0	0
1436	3	225114	208882	0	85	3	21	1	16	14	1	1	1	0	0	0	0	0	0	0	0	0	0	0	0	0	0
1439	2	224904	163860	0	66	7	12	3	10	8		0	1	0	0		0		0		0
1440	2	224905	163863	1	65	7	12	1	9	8	0	1	1	1	1	0	0	1	0	1	1
1441	1	229552	229551	0	53	1	10	0	6	5
1442	2	230328	230327	1	50	1	14	0	9	8	0	1	0	0	1	0	0	1	0	0
1443	1	230882	230881	1	20	1	11	0	8	6
1444	1	230884	230883	0	53	1	11	0	8	6
1445	1	230888	230886	1	55	1	11	0	8	6
1446	1	230890	230889	0	27	1	11	0	8	6
1447	1	231446	191957	0	47	2	10	0	7	5
1448	1	231223	157143	1	41	2	10	0	7	6	1	1	1	0	0	0	0	0
1451	3	224172	222783	0	48	1	20	2	16	14	0	1	1	0	0	0	0	0	0	0	0	0	0	0	0	0	0
1452	3	230258	230257	1	23	1	21	0	14	13
1453	1	230260	230259	1	20	1	10	0	7	5
1454	2	231211	231208	0	47	1	14	0	10	8
1455	2	231224	157485	1	42	4	14	0	11	10
1456	1	231444	179101	0	49	2	10	0	8	5
1457	2	230902	154837	0	37	4	14	0	14	8
1458	1	231463	217664	0	45	3	12	1	10	7
1459	3	229321	229320	0	69	1	21	0	18	14	0	0	0	0	0		0		0
1460	2	228599	184410	0	60	4	15	0	11	9	1	0	0	1	0	0	0	0	0	0	0	0
1461	1	229297	229296	1	43	1	14	0	8	6	0	0	0	0	0	0	0	0	0
1462	3	229318	229317	0	43	1	21	1	18	15
1464	3	227906	227905	0	46	1	21	0	16	14	0	1	1	0	0	0	0	0	0	0	0	0	0	0	0	0	0
1465	3	227909	227907	1	52	1	21	0	16	14	0	1	0	0	1	0	0	0	0	0	0	0	0	0	0	0	0
1466	3	226514	223523	1	60	2	21	1	16	14	0	0	0	0	0	0	0	0	0	0	0	0	0	0	0	0	0
1467	2	226971	221547	1	74	2	14	0	9	8	0	0	0	0	0	0	0	0	0	0
1468	3	227921	227917	1	62	1	19	0	15	13		0	0	0	0	0	0	0	0	0	0	0	0	0	0	0	0
1469	2	228571	228569	1	55	1	18	0	13	12	0	0	0	0	0	0
1470	1	229965	223336	1	48	1	10	0	7	5	1	0	0	0	0	0	0	0
1471	3	230377	229794	1	38	1	20	0	15	14	1	1	0	0	0	0	0	0	0	0	0	0	0	0	0	0
1472	3	230624	230623	1	30	1	21	0	16	14	1	0	0	0	0	0	0	0	0	0	0	0	0	0	0	0	0
1473	2	230906	230903	1	55	1	14	0	10	9	1	1	1	1	0	0	0	0	0	0	0
1474	2	231302	191386	1	59	2	18	0	11	10		1	0	0	0	0	0	0	0	0	0
1475	3	231466	231465	1	54	1	20	0	16	14	0	1	0	0	0	0	0	0	0	0	0	0	0	0	0	0	0
1476	2	231530	231529	1	67	1	14	0	10	8	0	0	0	0	0	0	0	0	0	0	0
1477	2	231521	175603	1	69	2	14	1	9	8		1	0			0	0			0
1479	2	231372	231371	1	51	1	13	0	9	8
1481	2	231157	231156	1	57	1	16	0	10	8
1482	2	231159	231158	1	28	1	16	0	10	8
1483	3	231591	231590	1	58	1	25	0	19	14
1485	3	229926	229925	1	62	1	21	0	14	13	1	1	1	0	0	0	0	0	0	0	0	0	0	0	0
1486	1	230734	230733	1	62	1	10	0	7	5	1	0	0	0	0	0	0	0
1487	3	230764	185109	1	59	2	21	0	16	14	1	0	0	1	0	0	0	0	0	0	0		0	0	0	0	0
1489	1	231120	231119	1	51	1	10	0	6	5	1	0	0	1	0	0	0
1491	1	229931	229930	1	58	1	10	0	6	5	1	1	0	0	0	0	0
1492	2	229184	229183	0	66	1	14	0	10	8	0	0	0	0	0	0	0	0	0	0	0
1493	2	229543	229542	0	60	1	14	2	10	9
1494	2	230305	223374	0	63	2	14	0	11	8	0	0	0	0	0	0	0	0	0	0	0	0	0
1495	2	231200	171026	0	53	2	21	0	19	11
1496	1	229980	229979	0	65	1	12	0	8	7	0	0	0	0	0	0	0	0	0
1498	2	227512	227511	1	40	1	14	0	10	8	0	0	0	0	0	0	0	0	0	0	0
1499	3	228036	220700	0	58	1	21	0	15	14	0	0	0	0	0	0	0	0	0	0	0	0	0	0	0	0
1500	2	229820	130604	1	58	17	13	0	10	8
1504	2	230620	181165	1	72	4	14	0	10	8	0	0	0	0	0	0	0	0	0	0	0
1505	3	230726	155937	1	36	2	21	0	16	14	0	0	1	1	0	1	0	1	0	0	0	0	0	0	0	0	0
1584	2	223010	149517	0	43	7	15	0	12	9
1585	1	230994	230993	0	31	1	10	0	7	5
1586	1	229982	229981	1	56	2	12	0	8	7	0	0	0	0	0	0	0	0
1587	2	231644	231643	1	41	1	14	0	9	8	0	1	0	0	0	0	0	0	0	0
1588	2	228780	228779	0	49	1	14	0	9	8	1	0	0	0	0	0	0	0	0	0
1589	3	230585	124080	1	63	17	21	1	16	14	0	0	0	0	0	0	0	0	0	0	0	0	0	0	0	0	0
1590	2	231214	64545	1	53	9	14	0	9	8	0	0	0	0	0	0	0	0	0	0
1591	2	230346	230345	0	44	1	14	0	9	8	0					1	1
1593	1	230549	230548	1	37	1	10	0	6	5	0	0	0	0	0	1	0
1595	4	227236	108064	0	60	11	29	0	20	18	0	0	0	0	0	0	0	0	0	0	0	0	0	0	0	0	0	0	0	0	0
1596	1	223649	183159	0	70	4	10	1	10	5	1	1	1	1	0	0	0	0	0	0	0
1597	1	223670	183156	1	72	4	10	1	7	5	1	0		0		0	0	0
1598	2	229942	178868	0	61	7	14	2	9	8	0	0	0	1	0		1	0	0	0
1599	1	230840	230839	1	63	1	10	1	7	5
1600	2	225553	27283	1	55	12	14	0	11	8
1601	2	231519	175308	1	29	2	14	0	9	8
1602	1	231002	490036	0	45	1	10	1	8	5
1603	1	230078	229908	1	42	2	10	0	10	6	1	1	0	0	0	0	0	0	0	0
1604	1	231014	231013	0	47	1	10	0	7	5	0	1	0	0	0		0	0
1605	1	231007	231006	0	54	1	10	0	7	5	1	1	1	1	0	0	0	0
1606	1	231009	231008	0	55	1	10	1	6	5	1	1	0	0	0	0	0
1607	2	231342	230665	0	75	2	14	1	9	8	0	0	0	0	0	0	0	0	0	0
1608	1	230682	96141	1	67	5	10	1	7	4	0	0		0	0	0	0	0
1610	1	231727	231726	1	58	1	10	0	6	5	1	0	0			0	0
1611	4	228737	183084	1	45	4	35	0	21	20
1612	4	231149	231148	1	67	1	25	0	19	18	0	1	0	0	0	0	0	0	0	0	0	0	0	0	0	0	0	0	0	0
1613	1	231747	231746	0	39	1	12	0	10	7	0	0	0	0	0	0	0	0	0	0	0	0
1614	2	231173	3744	1	67	8	18	0	15	9
1616	1	231099	231098	0	34	1	10	0	8	5
1617	2	231803	141671	0	63	2	18	0	13	12	1	0				0
1618	2	230704	178188	1	68	2	14	2	10	8	0	1	1	1	1	0	0	1	0	1	0
1620	2	230973	129197	1	75	4	14	1	10	8	0	0	0	0	0	0		0	0	0	0
1621	1	231036	231035	1	57	1	10	0	6	4	0	1	0	0	0	0	0
1622	1	231322	231321	0	68	1	10	1	6	5	0	0	0	0	0	0	0
1623	1	230784	222261	1	59	4	10	1	6	5	1	1	1	0	0	0	0
1624	2	227538	140043	1	60	6	14	0	11	9	0	0	0	0	0	0	0	0	0	0	0	0
1626	1	230007	230006	1	24	1	14	0	8	7	1	0	0	0	0	0	0	0	0
1628	1	231189	231188	0	56	1	10	0	6	5	0	0	1	1	0	0	0
1629	2	231430	192226	0	79	2	20	0	15	12
1631	1	228921	170040	0	53	6	10	1	8	5
1632	3	229469	229468	1	54	1	20	2	15	13	1	1	1	1	1	1	1	1	0	0	0	0	0	0	0	0
1635	1	231190	231139	1	74	1	12	0	8	7	1	0	0	0	0	0	0	0	0
1637	1	231215	140826	1	58	8	10	0	10	6		0	1	0	1	1	0	0	0	0	0
1639	1	231760	149779	1	39	4	10	0	8	5	0	0	0	0	0	0	0	0	0	0
1641	1	222941	153158	0	63	8	10	0	9	5
1643	1	231826	231825	1	45	1	10	0	9	5	1	0	1	0	0		0	1	1	0
1645	2	227751	170044	1	59	4	15	1	10	9	0		0	0	0	0	0	0	0
1648	2	223121	51283	0	42	5	14	0	10	8	0	1	1	1	0	0	0	0	0	0	0	0
1649	2	227669	226211	1	85	2	14	0	11	8
1650	3	229258	229255	1	55	1	21	0	16	14	1	1	0	0	0	0	0	0	0	0	0	0	0	0	0	0	0
1651	1	231178	231177	1	55	1	10	0	7	5
1652	1	228738	226173	1	60	2	10	0	10	5	0	0		0	0	0	0	0	0	0	0
1654	3	223111	146227	0	54	4	21	1	16	14
1655	1	229971	191904	1	76	3	11	0	7	6
1656	1	229972	191907	1	74	3	11	0	7	6	1	0	0	0	0	0	0	0
1657	2	230761	181162	1	85	4	14	2	10	8	0	0	0	0	0			0	1	0	0
1658	3	228973	224788	1	34	2	20	0	15	14	0	1	1	0	0	0	1	0	0	0	0	0	0	0	0	0
1659	1	189864	113194	0	68	15	10	0	6	5
1660	1	189869	115899	1	63	16	10	0	6	5		0	0	0	0		0
1661	1	229766	179427	1	63	4	10	0	7	5	0	1	0	0	0	0	0	1
1663	1	230885	172381	1	60	10	10	0	8	5	0	1	0	0	1	0	0	0	0	0
1664	1	230887	172381	0	60	10	10	1	8	5	0	1	0	0	0	0	0	0	0	0
1665	1	231442	231441	1	57	1	10	1	8	5
1666	2	230414	230413	0	61	1	14	0	10	8	0	1	1	1	0	1	0	0	0	0	0
1667	1	231870	231869	1	55	1	10	0	6	4	1	1	0	0	0	0
1668	1	229949	228078	0	56	3	10	0	8	4
1670	2	230179	106136	1	79	5	28	2	10	8
1671	1	231202	231201	0	60	1	10	0	6	5	0	0	1	0	1	0	0
1672	1	231204	231203	0	21	1	10	0	6	5	0	0	0	0	0	0	0
1674	2	229224	225962	1	72	2	15	2	13	9	0	0	0		0	0		0	0	0	0		0
1675	2	229340	208392	1	35	3	13	0	10	8					0			0	0	0
1676	1	231926	231925	1	51	1	10	0	8	5
1677	2	227382	225058	0	72	1	21	2	11	10	0	0	0	0	0	0	0	0	0	0	0	0
1678	2	231678	220990	1	52	2	14	0	11	8	0	1	0	0	1	0	0	0	0	0	0	0	0
1679	2	231679	220994	1	49	2	14	0	11	8		0	0	1	1	0	0	0	0	0	0	0	0
1680	2	227884	135799	0	77	8	14	0	10	8	0	0	0	0	0	0	0	0	0	0
1681	2	227070	226358	0	53	1	14	4	9	8	1	0	0	0	0	0	0	0	0	0
1682	2	231717	231716	1	52	1	14	0	10	8	0	0	0	0	0	0	0				0
1685	2	226953	226951	1	60	1	14	0	9	8
1686	1	231564	231563	1	47	1	12	0	8	7
1687	2	232038	193767	0	47	2	13	0	10	8
1688	1	228985	18	0	85	32	12	2	9	7
1689	1	231144	231143	1	54	1	10	0	8	5	0	0	0	0	0	0	0	0	0	0
1690	1	231147	231146	0	55	1	10	0	8	5	1	1	0	0	0	0	0	0	0	0
1691	1	230915	230914	1	48	1	10	0	6	5	0	1	1	1	0	0	0
1692	1	232033	232032	0	62	1	10	0	8	6
1694	1	230809	230808	1	60	1	10	0	6	5	0	0	1	1	0	0	0
1695	1	231531	139603	0	61	7	10	0	8	5		1	1	0	0	0	0	0	0
1696	1	231765	231246	1	63	1	10	0	7	5	0	1	0	0	0	0	0	0
1697	1	231863	229085	1	39	1	10	0	6	5
1698	1	232067	232066	1	59	1	10	1	6	5	0	0		0	0		0
1700	1	231160	127469	1	60	5	10	0	6	5	0	0	0	0	0	0	0
1701	1	231205	221151	0	69	2	14	1	10	7		0	0	0	0	0	0	0	0	0	0	0
1702	1	230905	157923	0	51	6	10	0	8	5	0	1	0		0	0	0	0	0	0
1704	1	224754	224753	1	33	1	10	0	6	5	1	1	0	0	0	0	1
1705	1	224756	224755	1	65	1	10	0	6	5	0	0	1	0	0	0	0
1706	2	230350	222377	1	44	2	14	0	11	8	0	0	0	0		0	0	0	0	0
1710	1	228584	131294	1	71	20	11	0	9	7
1712	2	228732	170949	0	60	7	14	1	11	8	0	1	0	0	1	0	0	0	0	0	0	0	0
1713	2	231152	231150	1	60	1	14	0	9	8	0	0	0	0	0	0	0	0	0	0
1714	1	231891	231890	1	40	1	19	0	8	7
1717	1	227149	227148	0	69	1	10	1	6	5	0	0	0	0	0	0	0
1720	2	228187	123051	1	62	6	14	1	11	9	0	0	0	0	0	0	0	0	0	0	0	0
1722	2	230337	111365	1	70	8	14	1	11	8		0	0	0	0		0	0	0	0	0	0	0
1723	2	232166	139409	0	62	6	14	0	13	10		0	0	0	0	0	0	0	0	0	0	0	0	0
1724	2	223277	219914	0	63	3	13	0	10	8	0	1	0	1	1	0	1	0			0
1725	2	223278	219916	1	64	3	13	0	10	8	0	0	0	0	0	0	0	0	0	0	0
1726	2	231021	231020	0	53	1	14	0	9	8	0	0	0			0	0	0	0	0
1727	3	231285	102019	1	70	8	21	0	20	15			0	0	0	0	1	0	0	0	0	0	0	0	0	0	0	0	0	0
1728	3	224759	106291	0	70	15	25	1	20	16	0	0	0	0	0	0	0	0	0	0	0	0	0	0	0	0	0	0	0	0	0
1729	1	231164	231163	1	60	1	10	0	7	6	1	1	1	0	0	0	0	0
1730	1	231127	231126	1	45	1	10	0	7	5
1731	1	229376	156833	0	66	6	12	1	8	7
1732	2	226692	222119	1	48	2	14	0	11	8		1	0	0	0	0	0	0	0	0	0		0
1734	3	231547	174524	1	73	3	19	3	16	14	0	0	0	0	0	0	0	0	0	0	0	0	0	0	0	0	0
1735	1	231500	54994	1	54	11	10	0	7	5	0	1	0	0	0	0	0	0
1736	1	231865	231864	0	73	1	10	1	6	5
1737	2	231461	109330	1	65	17	13	0	9	8
1738	2	231896	231894	1	36	1	13	0	10	8
1739	1	226468	217922	1	49	2	10	1	6	5	0	1	1	0	0	0	0
1740	1	231382	187322	1	46	3	10	0	6	5	1	1	1	1	0	0	0
1741	1	231384	231383	1	49	1	10	0	6	5	0	0	0	0	0	0	0
1742	1	232106	232105	1	74	1	10	0	6	5	0	0	0	0	0	0	0
1743	1	229261	229260	1	70	1	10	0	8	4	0	0	0	0	0	0	0	0	0
1744	1	231987	231985	1	78	1	11	1	6	5	1	1	1	1	0	0	0
1746	2	223576	135420	1	66	9	15	0	11	9	0	0	0	0	0	1	0	0	0	0	0	0
1747	2	223577	173447	0	63	5	15	0	11	9		0	0		0	0		0	0	0	0		0
1749	2	229059	181788	1	50	3	14	0	10	8
1751	2	232112	232111	1	35	1	14	0	10	9	1	1	1	1	0	0	0	0	0	0	0
1753	2	232119	232113	1	50	1	14	0	11	8
1756	1	229293	229292	1	48	1	10	0	6	5	1
1757	1	230014	230013	1	32	1	10	0	7	5	0	0	0	0	0	0	0	0
1758	1	230017	230015	1	29	1	10	0	8	5	0	1	1		0	0	0	0
1759	2	230966	230965	0	47	1	14	0	10	8
1761	1	231740	231739	1	46	1	10	0	6	5	1	0	0	0	0	0	0
1762	2	227492	132101	0	62	7	15	0	10	9	0	0	0	0	0	0	0	0	0	0	0
1763	1	232073	178620	1	38	3	12	0	12	7
1764	2	231079	147425	1	75	4	14	0	11	9
1765	2	231235	231234	0	59	1	14	0	10	8
1766	3	230757	182736	0	79	4	21	2	17	14
1769	2	232096	232095	1	58	1	13	0	9	8
1770	1	231526	226814	0	78	1	10	0	6	5	0	0	0	0	0	0	0
1771	1	230554	230553	0	47	1	10	0	6	5
1772	2	231425	231424	0	43	1	14	0	9	8	0	0	0	0	0	0	0	0	0	0
1773	1	230846	221785	0	63	4	10	2	7	5			0	0	0	0	0	0
1774	1	230847	221788	1	62	2	10	0	6	5	1	1	0	0	0	1	0
1776	3	231477	231476	1	56	1	21	0	16	14	1	1	1	1	0	1	1	1	1	1	1	1	1	0	0	0	0
1777	1	228762	228761	0	69	1	10	0	6	5		0		0	0	0	1
1778	1	231686	208735	1	75	2	10	0	8	5
1780	1	232399	229521	1	69	2	10	2	6	5	0	0	0	0	0	0	0
1781	1	223663	222341	1	71	2	11	1	7	4	1	0	0	1	0	0	0	0
1782	1	223676	190304	1	58	3	11	0	8	5	1	1		0	0	0	0	0
1783	1	223675	190307	1	73	3	11	1	8	5	0	1	1	0	1	1	1	1	0
1784	1	231244	231243	1	46	1	10	0	6	5	0	1	0	0	0	0	0
1785	1	230418	193863	1	63	2	10	0	7	4	0	1	0	0	0	0	0	0
1786	1	230426	230425	0	65	1	10	0	7	4	0	1	1	1	1	1	0	0
1787	3	223783	221003	1	65	2	21	0	18	14	0	1	1	1	1	0	0	0	0	0	0	0	0	0	0		0	1	0	0
1788	1	232217	125350	1	37	15	10	0	8	4				0		0			0
1790	1	232254	110687	1	71	10	10	0	8	5	0	0	0	0
1792	1	230363	226796	0	74	2	10	3	6	5
1794	2	223752	186329	1	58	3	14	0	11	8	1	1	1	1	1	1	0	0	0	0	0	0
1795	2	223806	178727	1	56	4	14	1	10	8	1	0	0	1	1	0	0	0	0	0	0
1796	2	225143	223755	0	56	1	14	0	9	8	0	1	0	0	0	0	0	0	0
1797	2	230723	230722	0	49	1	14	2	9	8	0	0	0	0	0	0	0	0	0	0
1798	2	231469	231468	1	33	1	14	0	9	8	0	0	0	0	0	0	0	0	0	0
1799	2	231832	225199	0	60	2	14	0	10	8
1800	3	231960	158624	0	55	2	20	1	16	13				0		0		0	0	0	0	0		0	0	0
1801	3	230648	49545	0	74	27	21	3	18	14			0		0
1802	3	231560	231559	0	62	1	21	1	16	14	1	1	1	1	1	0	0	0	0	0	0	0	0	0	0	0	0
1803	2	232296	232295	0	33	1	13	0	9	9
1804	2	231291	231290	1	46	1	13	0	9	8	1	0	0	1	1	0	0	0	0	0
1810	3	230273	230272	1	22	1	21	0	16	14	1	0		0	0	1	0	0	0	0	0	1	0	0		0	0
1811	1	232494	217664	0	45	3	14	1	11	6
1812	1	232522	169621	0	60	2	10	0	9	5	0	1		0	0			1	1
1813	1	230584	136457	1	66	8	13	0	8	6
1815	1	226565	224116	0	78	2	10	0	8	5		0	0	0	0	0	0	0	0	0
1816	1	223757	172312	1	66	12	10	0	8	5	0	1	1	1	0	0	0	0	0	0
1817	2	230958	230956	1	52	1	14	0	9	8	1	1	1	0	0	0	1	0	0	0
1818	2	223661	171156	1	69	5	17	0	13	11	1	0	1	0	0	0	0	0	0	0	0		0	0
1819	2	223742	192453	1	65	3	14	0	10	8	0	0	0	0	0	0	0	0	0	0	0
1820	3	227466	227465	1	56	1	21	1	16	14	1	1	0	0	0	0	0	0	0	0	0	0	0	0	0	0	0
1821	1	231125	231124	0	45	1	10	0	6	5	0	0	0	0	0	0	0
1822	1	232053	232052	1	55	1	10	0	7	5
1823	2	231435	231434	0	65	1	14	3	9	8	0	0	0	0	0	0	0	0	0	0
1824	1	223682	190344	1	72	3	15	0	11	6		1	0	0	0	0	0	0	0	0	0	0	0
1825	2	223684	190347	1	68	3	15	0	11	9	0	1	0	0	0	0	0	0	0	0	0	0	0
1826	1	231835	231834	0	50	1	10	0	8	7
1827	1	231976	191707	0	65	2	10	0	6	5		1	0	0	0		0
1828	1	229758	25150	1	74	9	12	0	7	5	0	0	0	0	0	0	0	0
1829	2	230004	230003	0	60	1	14	0	10	8	0		0	0	0	0	0	0	0	0	0
1830	2	223735	221062	1	56	3	14	1	10	8	1	1	1	0	0	0	0	1	0	0
1831	2	230002	156103	1	61	5	14	0	10	8	0	1	1	0	0	0	0	1	0	0		0
1832	2	223814	222439	1	60	2	14	0	10	8
1833	2	225807	225805	1	68	1	14	0	10	8	0	0	0	0	0	0	0	0		0	0
1834	2	224122	179506	1	49	5	16	0	12	10
1835	3	232638	173335	1	50	6	19	1	15	13	0	0	0	0	0	0	0	0	0	0	0	0	0	0	0	0	0
1836	3	231280	231191	1	74	1	21	0	17	14	0	0	0	0	0	0	0	0	0	0	0	0	0	0	0	0	0	0
1838	2	225801	225800	0	68	1	14	1	11	8
1839	2	225474	225473	1	37	1	14	0	10	9	0	1	0		0	0	0	0	0	0	0
1840	2	231523	231522	0	62	1	14	0	10	8	1	0	0	0
1841	4	231525	231524	1	60	1	28	3	23	21	0		0	0	0	0	0	0	0	0	0	0	0	0	0	0	0	0	0	0	0
1842	1	232029	232028	1	38	1	10	0	6	5
1844	2	231852	231850	0	55	1	13	0	9	8
1845	2	221653	194112	0	44	2	13	0	10	8		1	0	0	0	0	0	0	0	0
1846	2	230777	175649	1	57	4	14	0	9	8	0	0	1	0	0	0	0	0	0	0
1847	2	229834	229833	1	57	1	14	0	10	8	0	1	0	0	0	0	0	0	0	0	0
1848	2	229832	229826	0	61	1	14	0	10	8	0	0	0	0	0	0	0	0	0	0	0
1849	2	230776	167416	0	59	5	14	0	9	8	1	0	0	0	0	1	0	0	0	0
1850	2	231338	231337	1	61	1	21	0	16	9	1	1	0	0	0	0	0	0	0	0	0	0	0	0	0
1851	1	231423	144456	1	60	4	10	0	8	5	0	1	1	1	1	0	0	1	0	1
1852	3	231057	231056	1	51	1	21	0	17	14	0	1	0	0	0	0	0	0	0	0	0	0	0	0	0	0	0	0
1853	1	232601	176930	1	47	2	10	0	7	5
1854	1	231341	231340	1	68	1	11	0	7	5	0	0	0	0	0	0	0	0
1855	3	231536	1369	0	90	11	21	0	16	14
1856	1	230221	230220	1	48	1	10	0	7	5	0	1	0	0	0	0	0
1857	2	231574	231573	0	64	1	14	0	9	8	0	1		0				0	0
1858	2	230893	136053	1	62	2	14	3	9	8	1	0	0	0	0	0	0	0	0	0
1859	1	231562	231562	0	47	1	10	0	6	5	1	1	1	0	0	0	0
1860	2	232303	140343	0	64	13	14	0	10	8	0		0	0	1	1	0
1861	2	232305	139904	1	60	12	14	0	10	8
1863	1	223521	131424	1	59	10	10	1	9	5		0	0	0		0	0	0	0	0
1864	1	231418	143974	0	63	5	10	2	7	5
1866	2	231389	224071	1	49	2	13	1	10	8
1867	2	231390	223444	0	56	2	13	0	10	8
1869	2	232127	232126	1	49	1	13	0	9	8	1	1	1	1	0	0	0	0	0	0
1870	2	232001	232000	1	43	1	14	0	9	8	0	0	0	0	0	0	0	0	0
1871	2	232065	232064	1	45	1	15	0	10	8	1	1	1	1	1	0	1	1	0	1	1
1872	2	232467	232466	0	48	1	14	1	10	8	1	1	0	0	0	0	0	1	0	0	0
1873	2	231620	162533	1	70	2	15	0	13	10	0	1	0	0	0	0	0	0	0	0	0	0	0	0	0
1874	3	231676	231675	1	53	1	21	0	15	14	1	0	0	0	0	0	0	0	0	0	0	0	0	0	0	0
1876	1	231257	126033	1	75	10	12	0	8	7	0	0	0	0	0	0	0	0	0
1877	2	231393	231392	0	59	1	13	0	10	8
1880	2	231299	231298	1	61	1	14	0	9	8	0	0	0	0	0	0	0	0	0	0
1881	2	231763	231762	0	63	1	14	1	9	8		1	1	0	0	0	0	0	0	0
1882	2	232354	232353	0	47	1	14	0	10	9
1883	2	232423	95022	1	66	18	14	0	12	8	0	0	0	0	0	0		0	0			0	0	0
1885	3	230921	222078	0	35	2	21	0	16	14	0	0	0	0	0	0	0	0	0	0	0	0	0	0	0	0	0
1886	3	232206	232205	1	57	1	21	1	16	14	0	0	0	0	0	0	0		0	0				0	0	0	0
1889	3	231339	5831	1	70	4	21	0	16	15
1890	2	231794	231792	0	65	1	14	0	11	8		0	0	0	0	0	0	0	0	0	0	0	0
1892	2	232805	182573	0	53	3	14	0	10	8
1894	1	231776	231775	1	53	1	10	0	6	5	0	1	0	0	0	0	0
1895	1	232777	129987	1	51	4	10	0	7	5	0	1	0	0	0	0	1	0
1896	1	231784	231783	1	37	1	10	0	8	5	1	0		0	0	0	0	0	0
1898	1	232595	232594	1	70	1	10	1	7	5
1900	2	231878	231877	0	66	1	14	0	9	8	1	1	1	0	0	0	0		0
1901	2	231611	231610	1	54	1	14	0	9	8	0	1	0	0	0	0	0	0	0
1902	2	231613	231612	0	52	1	14	0	9	8	0	1	0	0	0	0	0	0	0	0
1903	1	232333	158395	1	33	6	10	0	7	5
1904	1	232114	175953	0	51	4	10	0	8	5	0	1	1		1	0
1905	1	231648	231647	0	48	1	11	0	7	5	1	1	1	1	0	0	0
1906	2	229494	183748	1	66	4	13	2	11	8	1	1	1	1	1	0	1	0	0	0	0	0
1907	2	230591	119417	0	70	6	14	0	12	8
1909	3	231822	231820	0	61	1	21	2	17	14	0	0	0	0	0	0	0	0	0	0	0	0	0	0	0		0	0
1910	2	232104	232103	0	40	1	14	0	10	8	0	0	0	0	0	0	0	0	0	0	0
1914	2	232063	194067	1	69	4	14	0	13	8
1915	3	231946	231945	1	54	1	20	0	15	13	0	0	0	0	0	0	0	0		0	0	0	0	0	0	0
1916	3	228776	228775	1	66	1	20	0	14	13	1	0	1	1	0	0	0	0	0	0	0	0	0	0	0
1918	2	232491	152467	1	55	13	14	0	10	8
1919	3	230450	230449	1	68	1	19	0	14	13	0	1	0	0	0	0	0	0	0	0	0	0	0	0	0
1921	1	231708	231707	0	48	1	10	0	8	5	0	0	1	1	0	1	0	1	0
1922	1	231576	231575	0	55	1	10	0	6	5	1	1	0	0	1	1	0
1923	2	232465	232463	1	44	1	14	0	10	8
1925	2	232454	167560	1	49	2	18	0	13	12	1	0	0	1	0	0	0	0	0	0	0	0	0	0
1926	2	231572	225927	0	65	2	14	2	10	8
1928	1	232686	232685	0	47	1	10	0	11	5			0	1		0	0				0
1929	1	232852	232851	0	35	1	12	0	8	7	1	1	0		0		0
1930	1	232621	232281	0	53	1	12	0	9	7		1	0	0	0	0	0	0
1932	3	229693	183458	0	51	2	20	2	15	14	0	1	0	0	0	0	0	0	0	0	0	0	0	0	0	0
1935	2	232335	148887	1	63	2	14	1	10	9	0	0	0	1	0	1	0	1	1	0	0
1937	2	232931	232930	0	63	1	15	0	11	9	0	0	0	0	0	0	0	0	0	0		0
1939	3	229095	226485	1	60	1	21	0	17	14	0	0	0	0	1	1	0	1	0	0	0	0	0	0	0	0	0	0
1941	2	232484	217070	1	33	2	14	0	11	8	0	1	1	1	0	0		0	0	0	0	0	0
1942	2	231475	231474	0	56	1	14	1	10	8	1	1	0	0	0	0	0	0	0	0	0
1943	3	232498	232497	0	49	1	21	0	18	16		0	1	0	0	0	0		0	0	0	0	0	0	0	0	0		0	0
1944	2	233051	175497	1	44	3	13	0	9	8
1945	2	232204	139496	1	44	6	14	0	9	8
1946	3	230167	230166	0	60	1	21	1	17	14	0	0	0	0	0	0	0	0	0	0	0	0	0	0	0	0	0	0
1948	3	232203	139499	0	77	6	22	1	19	15		0		0	0	0	0	0	0	0	0	0	0	0	0	0	0	0	0	0
1949	4	232479	232478	1	75	1	28	0	23	21	0	0	0	0	0	0	0	0	0	0	0	0	0		0	0	0	0	0	0	0
1951	1	232219	232218	1	24	1	10	0	6	5	0	0	0	0	0	1	0
1954	1	232776	184188	1	47	5	10	0	10	5	0	0	1	0	0	0	0	0	0	0
1960	2	231810	231809	0	58	1	14	0	9	8	0	0	0	0	0	0	0	0	0	0
1961	2	231812	231811	1	40	1	14	0	9	8	0	1	1	1	0	0	1	0	0	0
1962	2	231953	231943	1	59	1	14	0	9	8	1	0	0	0	0	0	0	0	0	0
1963	4	225664	224019	1	63	2	28	0	24	21	0	1	1	1	0	0	0	0	0	0	0	0	0	0	0	0	0	0	0	0	0	0	0	0	0
1964	1	232666	224290	0	34	2	13	0	12	7	0	1	1	1	1	1	0	1	1	1	1	1	1	1
1965	2	232866	147407	0	72	3	14	2	10	8	0	0	0	0	0	0	0	0	0	0	0
1966	1	233157	233156	1	34	1	12	0	10	5
1967	1	233127	210619	0	58	1	14	2	12	7	0	0	0	0	1	0	0	0	0	0	0	0	0	0
1968	2	232578	232577	1	55	1	14	1	9	8	0	1	1	1	0	0	0	0	0	0
1970	2	231845	222115	1	47	2	18	0	14	12	1	0	0	0	0	0	0	0	0	0	0	0	0	0	0
1971	2	231846	222121	1	61	2	18	1	14	12	1	1	0	0			0		0
1972	1	233230	233229	1	30	1	10	0	7	5
1973	2	231637	231636	0	58	1	14	0	10	8	0	1	0	0			0	0	0	0	0
1977	4	231400	231399	1	40	1	26	0	25	20	0	0	0	0	0	0	0	0	0	0	0	0	0	0	0	0	0	0	0	0	0	0	0	0	0	0	0
1979	1	233279	233278	1	53	1	10	0	7	5	1	1	1	1	0	0	0	0
1980	1	231279	231278	0	52	1	11	0	8	6
1982	2	232214	224523	1	33	2	15	0	11	9	0	1	0	0	0	0	0	0	0	0	0	0
1983	1	231104	141278	1	60	3	10	0	8	5	1	1	0	0	0	0	0	0	0	0
1985	1	232606	223864	1	48	2	10	0	8	5
1986	1	232141	177629	0	62	4	11	0	8	5	1		0	1	0	0	0	0	0	0
1987	1	232142	177632	1	61	5	11	0	8	5		1	0	0	0	0	0	0	0	0
1990	1	231256	231255	1	54	1	10	1	6	5	0	0	0	0	1	0	0
1991	1	232586	232585	0	51	1	10	0	7	5	0	0	0	0	0	0	0	0
1992	1	233031	61679	0	80	17	12	1	9	7
1993	1	233219	224302	0	64	2	10	2	9	5
1995	1	230641	192497	0	51	5	12	0	10	7
1996	1	232953	232952	1	64	1	10	0	9	5
1997	1	233194	217031	1	50	3	10	0	8	6
1998	1	232247	194562	1	46	2	10	1	7	5
1999	1	232249	232248	0	52	1	10	1	7	5
2000	1	232697	221845	1	60	3	12	0	10	7	1	1	1
2001	1	233257	233256	1	48	1	10	0	8	6	0	0	1		0	0	0		0
2002	1	233183	232868	1	79	1	10	0	5	5	0	0	0	0	0	0
2003	3	233090	183177	1	42	2	21	0	16	14
2005	2	228538	181037	1	53	5	14	0	10	8
2006	3	232453	158983	1	39	2	21	0	17	14
2007	3	232660	232659	1	41	1	21	0	15	14
2008	1	233394	227589	0	63	2	12	1	8	6
2010	2	224996	223784	1	59	2	14	0	9	8
2012	1	233534	143064	0	48	8	10	0	9	5		0	1	0	0	0	0	0	0	0
2014	1	233599	231643	1	41	2	10	0	7	5	1	1			0
2016	1	232062	232061	0	53	1	10	0	6	5	0	0	0	0	0	0	0
											360	432	271	180	103	93	66	48	33	31	12	9	6	5	5	5	7	7	2	1	1	0
											1014	1105	1094	1085	1077	1076	1066	882	740	671	482	351	290	249	200	181	147	74	56	48	36	28
											35.503	39.095	24.7715	16.5899	9.5636	8.64312	6.19137	5.44218	4.45946	4.61997	2.48963	2.5641	2.06897	2.00803	2.5	2.76243	4.7619	9.45946	3.57143	2.08333	2.77778	0
											35.503	39.095	24.7715	16.5899	9.5636	8.64312	6.19137	5.44218	4.45946	4.61997	2.48963	2.5641	2.06897	2.00803	2.5	2.76243	4.7619	9.45946	3.57143	2.08333	2.77778	0
											35.503
											39.095
											24.7715
											16.5899
											9.5636
											8.64312
											6.19137
											5.44218
											4.45946
											4.61997
											2.48963
											2.5641
											2.06897
											2.00803
											2.5
											2.76243
											4.7619
											9.45946
											3.57143
											2.08333
											2.77778
											0
										5	174	207	127	82	48	43	30	20	18	18	5	3	3	3	4	5	4	4	0	1	0	0
											509	550	552	544	542	545	537	448	371	346	246	181	154	128	100	88	72	38	31	25	22	18
											34.1847	37.6364	23.0072	15.0735	8.85609	7.88991	5.58659	4.46429	4.85175	5.20231	2.03252	1.65746	1.94805	2.34375	4	5.68182	5.55556	10.5263	0	4	0	0
										MW	0.341847	0.376364	0.230072	0.150735	0.0885609	0.0788991	0.0558659	0.0446429	0.0485175	0.0520231	0.0203252	0.0165746	0.0194805	0.0234375	0.04	0.0568182	0.0555556	0.105263	0	0.04	0	0
										SD	0.474795	0.484914	0.421261	0.35812	0.284371	0.269829	0.229877	0.206749	0.215147	0.222395	0.141398	0.128025	0.138657	0.151883	0.196946	0.232822	0.230669	0.311012	0	0.2	0	0
										10	140	152	103	68	36	35	25	16	11	9	4	3	1	1	1	0	3	2	2	0	1	0
											361	398	385	385	380	376	376	308	255	224	168	121	93	85	70	69	53	23	16	14	9	8
											38.7812	38.191	26.7532	17.6623	9.47368	9.30851	6.64894	5.19481	4.31373	4.01786	2.38095	2.47934	1.07527	1.17647	1.42857	0	5.66038	8.69565	12.5	0	11.1111	0
										15	39	64	36	27	17	15	11	12	4	4	3	3	2	1	0	0	0	1	0	0	0	0
											126	138	138	139	138	139	136	113	101	90	62	45	40	33	28	23	21	12	8	8	4	1
											30.9524	46.3768	26.087	19.4245	12.3188	10.7914	8.08824	10.6195	3.9604	4.44444	4.83871	6.66667	5	3.0303	0	0	0	8.33333	0	0	0	0
										20	7	9	5	3	2	0	0	0	0	0	0	0	0	0	0	0	0	0	0	0	0	0
											18	19	19	17	17	16	17	13	13	11	6	4	3	3	2	1	1	1	1	1	1	1
											38.8889	47.3684	26.3158	17.6471	11.7647	0	0	0	0	0	0	0	0	0	0	0	0	0	0	0	0	0
[truncated: 990 more columns]
